# Supplementary material for: Fungal communities in sediments of subtropical Chinese seas as estimated by DNA metabarcoding
Source: PubMed Central journal article supplement (PMC4873734; doi:10.1038/srep26528), 2016-05-20
Supplement: srep26528-s1.pdf [file srep26528-s1.pdf]

Fungal communities in sediments of subtropical Chinese seas as estimated  
by DNA metabarcoding

Wei Li<sup>1\*</sup>, Meng Meng Wang<sup>1</sup>, Xi Guang Wang<sup>2</sup>, Xiao Li Cheng<sup>1,3</sup>, Jia Jia Guo<sup>1</sup>, Xiao

Meng Bian<sup>1</sup> & Lei Cai<sup>3\*</sup>

<sup>1</sup> College of Marine Life Sciences, Ocean University of China, Qingdao 266003, China

<sup>2</sup> Institute of Agricultural Information, Chinese Academy of Agricultural Sciences, Beijing  
100081, China

<sup>3</sup> State Key Laboratory of Mycology, Institute of Microbiology, University of Chinese  
Academy of Sciences, Beijing 100101, China

\*Corresponding authors: liwei01@ouc.edu.cn; cail@im.ac.cn

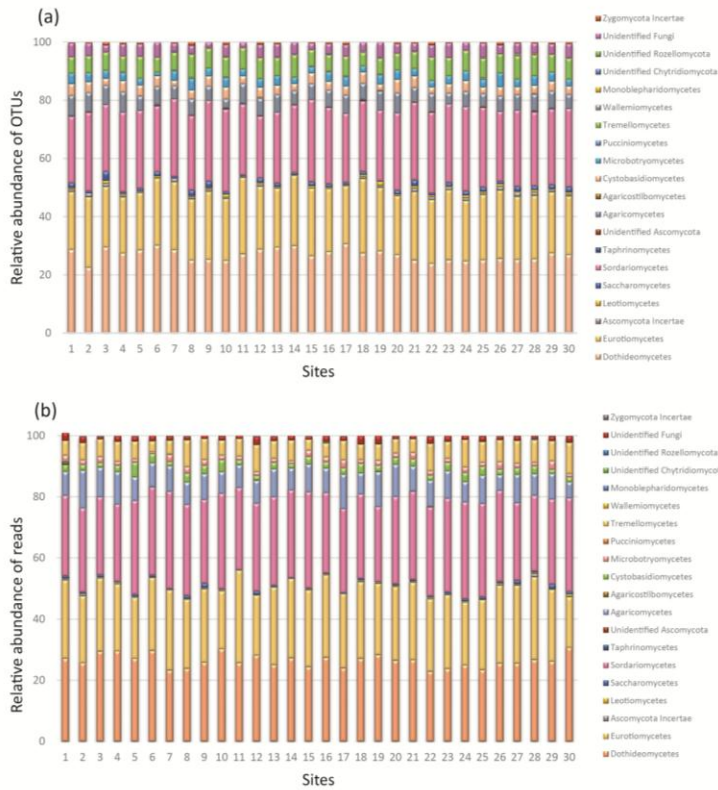

Supplementary Figure S1. Relative abundances of (a) OTU and (b) read numbers at class level in different sampled sites.

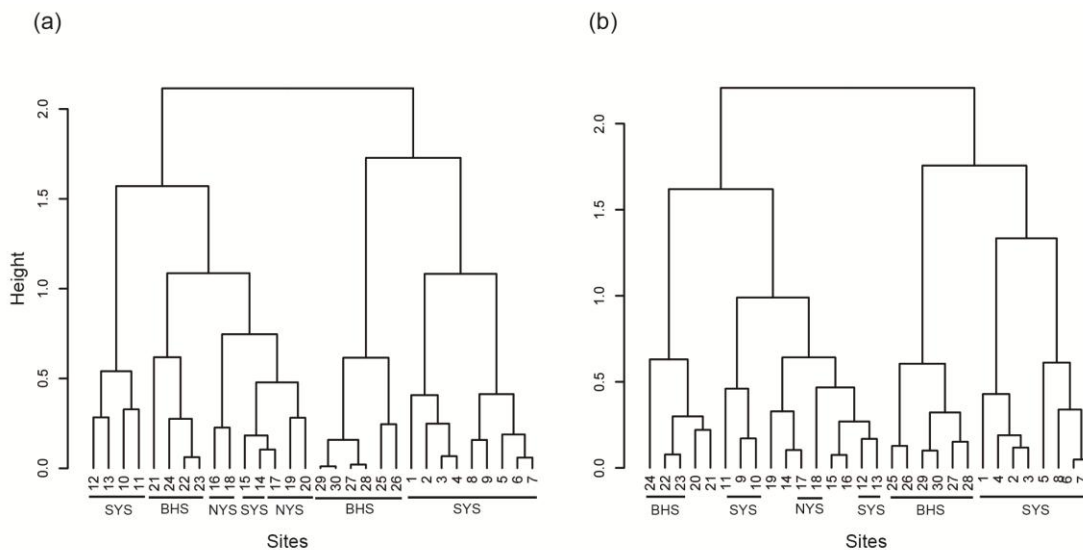

Supplementary Figure S2 Hierarchic clustering of sampled sites using the Euclidean distance of scores for the first two axes of the db-RDA model without variable selection tests (a) and after variable selection tests (b).

Supplementary Table S1. Information of sampled sites including spatial and environmental factors, OTU richness, Shannon index, and evenness values.

| Site | Region | Longitude (°) | Latitude (°) | WD (m) | TBW (°C) | Salinity(‰) | TOC (mg/g) | TN (mg/g) | C/N   | pH   | Richness<br>of OTU | Shannon<br>index | Pielou'<br>evenness |
|------|--------|---------------|--------------|--------|----------|-------------|------------|-----------|-------|------|--------------------|------------------|---------------------|
| 1    | SYS    | 123           | 31.2         | 63     | 19.8743  | 34.019      | 0.92       | 0.06      | 15.1  | 8.36 | 391                | 4.847397         | 0.8121351           |
| 2    | SYS    | 124.78        | 32.27        | 47.8   | 14.6316  | 31.945      | 1.13       | 0.08      | 14.04 | 8.55 | 293                | 4.730683         | 0.8328414           |
| 3    | SYS    | 125.67        | 32.8         | 90     | 12.5611  | 33.293      | 1.85       | 0.08      | 23.85 | 8.26 | 288                | 4.6663           | 0.8240037           |
| 4    | SYS    | 122.22        | 32.47        | 25     | 20.4331  | 30.381      | 1.36       | 0.07      | 20    | 8.02 | 332                | 4.745514         | 0.8174683           |
| 5    | SYS    | 123           | 32.93        | 32     | 14.4658  | 31.323      | 0.97       | 0.07      | 14.79 | 8.15 | 344                | 4.847999         | 0.8300456           |
| 6    | SYS    | 124           | 33.13        | 60     | 10.8012  | 32.679      | 1.33       | 0.09      | 14.13 | 8.16 | 346                | 4.701174         | 0.8041089           |
| 7    | SYS    | 123           | 34           | 67.2   | 9.9863   | 32.955      | 1.23       | 0.12      | 10.59 | 8.37 | 312                | 4.706288         | 0.819482            |
| 8    | SYS    | 124           | 34           | 78.9   | 8.8943   | 32.82       | 1.13       | 0.1       | 11.19 | 8.43 | 352                | 4.778653         | 0.8149648           |
| 9    | SYS    | 122           | 35           | 50.5   | 8.1514   | 32.105      | 0.79       | 0.08      | 9.83  | 8.3  | 368                | 4.858158         | 0.8222902           |
| 10   | SYS    | 123           | 35           | 73     | 9.3679   | 32.981      | 1.29       | 0.14      | 9.38  | 8.27 | 342                | 4.718191         | 0.808628            |
| 11   | SYS    | 124           | 35           | 80.8   | 8.8383   | 32.735      | 0.83       | 0.09      | 9.03  | 8.17 | 258                | 4.5413           | 0.8178161           |
| 12   | SYS    | 122           | 36           | 43.5   | 7.4973   | 31.458      | 1.13       | 0.1       | 11.59 | 8.23 | 373                | 4.755529         | 0.8030846           |
| 13   | SYS    | 123           | 36           | 70     | 8.6907   | 32.742      | 1.39       | 0.18      | 7.93  | 8.15 | 336                | 4.625713         | 0.7951908           |
| 14   | SYS    | 122.67        | 37           | 34     | 14.3032  | 31.085      | 1.04       | 0.06      | 17.14 | 8.36 | 364                | 4.662401         | 0.7906189           |
| 15   | SYS    | 123.52        | 37           | 73     | 7.8796   | 32.168      | 1.02       | 0.06      | 18.49 | 8.4  | 348                | 4.561595         | 0.7794663           |
| 16   | NYS    | 123.18        | 38.05        | 64.3   | 6.384    | 32.081      | 0.8        | 0.07      | 11.13 | 8.14 | 369                | 4.764123         | 0.8060036           |
| 17   | NYS    | 122.69        | 37.48        | 48.5   | 13.2141  | 31.158      | 0.79       | 0.03      | 26.61 | 8.19 | 350                | 4.77172          | 0.8145739           |
| 18   | NYS    | 122.18        | 38.19        | 52.8   | 4.3177   | 31.642      | 1.73       | 0.2       | 8.54  | 8.21 | 281                | 4.612119         | 0.8179902           |
| 19   | NYS    | 122.47        | 37.77        | 34     | 9.8419   | 31.177      | 1.06       | 0.05      | 19.21 | 8.22 | 380                | 4.738954         | 0.7977807           |
| 20   | NYS    | 121.04        | 38.09        | 24.3   | 13.6521  | 30.887      | 0.94       | 0.05      | 18.91 | 8.22 | 365                | 4.630726         | 0.7848824           |
| 21   | BHS    | 119.08        | 38.22        | 17     | 17.583   | 29.598      | 1.97       | 0.07      | 27.97 | 8.29 | 352                | 4.609745         | 0.7861588           |
| 22   | BHS    | 119.54        | 38.66        | 27.5   | 15.222   | 30.736      | 1.25       | 0.11      | 11.41 | 8.17 | 310                | 4.608213         | 0.8033043           |
| 23   | BHS    | 120           | 39.09        | 22.7   | 18.4987  | 30.596      | 0.79       | 0.05      | 15.34 | 8.16 | 319                | 4.564712         | 0.7917712           |

|    |     |        |       |      |         |        |      |      |       |      |     |          |           |
|----|-----|--------|-------|------|---------|--------|------|------|-------|------|-----|----------|-----------|
| 24 | BHS | 120.12 | 39.85 | 21   | 13.5339 | 29.515 | 1.03 | 0.09 | 11.22 | 8.19 | 211 | 4.456939 | 0.8327834 |
| 25 | BHS | 121    | 39.03 | 35   | 14.5109 | 30.76  | 0.74 | 0.05 | 15.65 | 8.14 | 343 | 4.707228 | 0.8063455 |
| 26 | BHS | 118.87 | 39.02 | 21.3 | 17.1929 | 30.405 | 0.74 | 0.05 | 14.11 | 8.14 | 318 | 4.748065 | 0.8240234 |
| 27 | BHS | 118.97 | 38.62 | 24.5 | 11.8816 | 30.433 | 1.67 | 0.08 | 20.86 | 8.37 | 337 | 4.759442 | 0.8177619 |
| 28 | BHS | 119.28 | 38.09 | 17.5 | 18.4314 | 29.079 | 1.66 | 0.06 | 29.3  | 8.3  | 362 | 4.729922 | 0.8028186 |
| 29 | BHS | 119.48 | 37.96 | 18.3 | 18.2201 | 29.308 | 1.62 | 0.06 | 25.15 | 8.28 | 357 | 4.807908 | 0.8179864 |
| 30 | BHS | 119.88 | 37.7  | 16.4 | 20.9746 | 29.281 | 1.25 | 0.05 | 24.77 | 8.26 | 376 | 4.724247 | 0.7967242 |

Supplementary Table S2. Read counts of OTUs in different sampled sites.

| OTUs  | 1   | 2   | 3   | 4   | 5   | 6   | 7   | 8   | 9   | 10  | 11  | 12  | 13  | 14  | 15  | 16  | 17  | 18  | 19  | 20  | 21  | 22  | 23  | 24 | 25  | 26  | 27  | 28  | 29  | 30  | sum  |
|-------|-----|-----|-----|-----|-----|-----|-----|-----|-----|-----|-----|-----|-----|-----|-----|-----|-----|-----|-----|-----|-----|-----|-----|----|-----|-----|-----|-----|-----|-----|------|
| OTU1  | 300 | 140 | 96  | 157 | 120 | 150 | 66  | 109 | 86  | 134 | 75  | 191 | 109 | 143 | 91  | 150 | 107 | 113 | 165 | 180 | 138 | 122 | 133 | 44 | 162 | 103 | 109 | 179 | 126 | 267 | 4065 |
| OTU2  | 13  | 130 | 117 | 156 | 130 | 192 | 150 | 222 | 217 | 136 | 137 | 129 | 188 | 270 | 259 | 244 | 184 | 124 | 185 | 0   | 3   | 0   | 1   | 0  | 0   | 0   | 0   | 0   | 1   | 0   | 3188 |
| OTU3  | 13  | 10  | 9   | 11  | 4   | 1   | 13  | 11  | 42  | 193 | 101 | 331 | 221 | 267 | 233 | 159 | 207 | 113 | 172 | 259 | 204 | 164 | 218 | 87 | 10  | 17  | 9   | 16  | 10  | 28  | 3133 |
| OTU4  | 7   | 7   | 0   | 5   | 79  | 169 | 159 | 144 | 85  | 125 | 83  | 115 | 129 | 203 | 221 | 128 | 154 | 74  | 167 | 171 | 205 | 106 | 123 | 47 | 5   | 5   | 7   | 7   | 4   | 11  | 2745 |
| OTU5  | 167 | 144 | 115 | 196 | 111 | 144 | 123 | 157 | 153 | 168 | 75  | 84  | 27  | 29  | 34  | 30  | 31  | 14  | 39  | 27  | 14  | 32  | 29  | 4  | 153 | 72  | 166 | 123 | 129 | 111 | 2701 |
| OTU6  | 95  | 0   | 1   | 0   | 0   | 0   | 0   | 1   | 2   | 0   | 1   | 1   | 2   | 46  | 63  | 58  | 65  | 43  | 78  | 74  | 72  | 59  | 41  | 14 | 195 | 187 | 224 | 255 | 199 | 151 | 1927 |
| OTU7  | 12  | 11  | 8   | 9   | 12  | 9   | 15  | 10  | 15  | 10  | 4   | 87  | 116 | 127 | 162 | 121 | 171 | 66  | 232 | 228 | 151 | 80  | 140 | 34 | 10  | 4   | 12  | 7   | 13  | 5   | 1881 |
| OTU8  | 34  | 26  | 18  | 22  | 23  | 25  | 22  | 34  | 38  | 20  | 14  | 23  | 29  | 41  | 33  | 30  | 38  | 12  | 46  | 291 | 297 | 193 | 160 | 52 | 29  | 17  | 22  | 30  | 23  | 28  | 1670 |
| OTU9  | 183 | 92  | 83  | 76  | 81  | 99  | 110 | 139 | 79  | 1   | 0   | 0   | 0   | 0   | 3   | 0   | 0   | 0   | 0   | 2   | 0   | 0   | 1   | 0  | 0   | 8   | 89  | 150 | 114 | 284 | 1594 |
| OTU10 | 44  | 68  | 35  | 51  | 37  | 44  | 33  | 99  | 82  | 44  | 40  | 25  | 33  | 81  | 77  | 81  | 45  | 35  | 41  | 79  | 53  | 26  | 33  | 13 | 27  | 48  | 41  | 50  | 42  | 32  | 1439 |
| OTU11 | 63  | 20  | 42  | 69  | 51  | 44  | 38  | 74  | 54  | 49  | 42  | 27  | 56  | 62  | 45  | 51  | 53  | 15  | 80  | 61  | 21  | 29  | 19  | 12 | 37  | 45  | 62  | 58  | 33  | 36  | 1348 |
| OTU12 | 46  | 9   | 5   | 6   | 4   | 18  | 59  | 53  | 62  | 81  | 39  | 64  | 67  | 64  | 58  | 80  | 57  | 22  | 57  | 79  | 71  | 41  | 48  | 12 | 28  | 33  | 25  | 38  | 34  | 83  | 1343 |
| OTU13 | 33  | 33  | 19  | 45  | 19  | 17  | 24  | 109 | 102 | 4   | 27  | 39  | 34  | 65  | 24  | 20  | 40  | 14  | 31  | 31  | 37  | 42  | 18  | 17 | 0   | 0   | 12  | 35  | 61  | 83  | 1035 |
| OTU14 | 45  | 36  | 30  | 38  | 21  | 34  | 21  | 37  | 48  | 36  | 27  | 35  | 40  | 35  | 41  | 57  | 23  | 13  | 34  | 45  | 53  | 18  | 22  | 15 | 23  | 25  | 45  | 29  | 25  | 62  | 1013 |
| OTU15 | 51  | 12  | 22  | 16  | 7   | 47  | 12  | 43  | 29  | 41  | 26  | 36  | 19  | 42  | 57  | 25  | 19  | 15  | 55  | 29  | 29  | 41  | 19  | 12 | 28  | 39  | 38  | 40  | 45  | 43  | 937  |

|       |     |    |    |     |    |    |    |    |    |     |    |    |    |    |    |    |    |    |    |    |    |    |    |    |     |     |    |    |    |     |     |
|-------|-----|----|----|-----|----|----|----|----|----|-----|----|----|----|----|----|----|----|----|----|----|----|----|----|----|-----|-----|----|----|----|-----|-----|
| OTU16 | 100 | 67 | 55 | 58  | 60 | 5  | 1  | 0  | 1  | 0   | 0  | 0  | 0  | 1  | 9  | 1  | 4  | 1  | 5  | 5  | 11 | 0  | 1  | 0  | 105 | 75  | 84 | 68 | 65 | 115 | 897 |
| OTU17 | 51  | 32 | 26 | 29  | 17 | 46 | 44 | 62 | 16 | 7   | 0  | 2  | 3  | 0  | 0  | 2  | 8  | 0  | 0  | 0  | 5  | 0  | 6  | 2  | 157 | 123 | 42 | 32 | 36 | 74  | 822 |
| OTU18 | 9   | 1  | 3  | 4   | 1  | 2  | 0  | 9  | 43 | 57  | 39 | 50 | 27 | 48 | 62 | 33 | 46 | 23 | 58 | 78 | 91 | 45 | 42 | 23 | 2   | 3   | 7  | 2  | 2  | 4   | 814 |
| OTU19 | 208 | 11 | 13 | 25  | 21 | 44 | 22 | 33 | 44 | 13  | 30 | 19 | 22 | 46 | 40 | 46 | 36 | 17 | 18 | 20 | 22 | 15 | 12 | 12 | 6   | 0   | 5  | 2  | 0  | 2   | 804 |
| OTU20 | 66  | 37 | 59 | 71  | 26 | 65 | 33 | 44 | 27 | 22  | 10 | 11 | 9  | 27 | 22 | 21 | 23 | 13 | 30 | 14 | 29 | 12 | 5  | 5  | 0   | 0   | 0  | 0  | 0  | 66  | 747 |
| OTU21 | 145 | 44 | 29 | 47  | 37 | 44 | 8  | 10 | 11 | 9   | 5  | 11 | 10 | 4  | 7  | 7  | 6  | 1  | 9  | 11 | 7  | 4  | 5  | 1  | 46  | 44  | 48 | 55 | 48 | 29  | 742 |
| OTU22 | 9   | 10 | 5  | 4   | 8  | 6  | 12 | 13 | 23 | 36  | 13 | 64 | 42 | 56 | 40 | 49 | 29 | 16 | 55 | 51 | 39 | 30 | 37 | 10 | 9   | 10  | 0  | 17 | 7  | 27  | 727 |
| OTU23 | 13  | 14 | 10 | 11  | 2  | 6  | 10 | 9  | 13 | 8   | 9  | 7  | 16 | 42 | 44 | 64 | 61 | 20 | 42 | 51 | 34 | 32 | 52 | 9  | 19  | 14  | 29 | 13 | 12 | 14  | 680 |
| OTU24 | 91  | 22 | 21 | 25  | 21 | 16 | 19 | 30 | 22 | 15  | 11 | 17 | 24 | 22 | 23 | 15 | 12 | 9  | 10 | 12 | 13 | 5  | 6  | 1  | 38  | 29  | 43 | 43 | 25 | 31  | 671 |
| OTU25 | 51  | 23 | 26 | 52  | 28 | 57 | 22 | 50 | 43 | 30  | 26 | 38 | 26 | 39 | 17 | 12 | 8  | 0  | 0  | 14 | 8  | 7  | 17 | 5  | 1   | 0   | 0  | 0  | 29 | 37  | 666 |
| OTU26 | 40  | 21 | 18 | 32  | 32 | 35 | 21 | 41 | 13 | 28  | 4  | 31 | 9  | 28 | 16 | 18 | 8  | 10 | 22 | 22 | 16 | 8  | 10 | 2  | 9   | 8   | 3  | 29 | 23 | 64  | 621 |
| OTU27 | 22  | 12 | 10 | 15  | 39 | 13 | 15 | 28 | 9  | 16  | 12 | 17 | 16 | 16 | 30 | 14 | 27 | 20 | 32 | 24 | 22 | 22 | 26 | 15 | 39  | 18  | 19 | 13 | 11 | 26  | 598 |
| OTU28 | 44  | 18 | 9  | 10  | 16 | 5  | 28 | 40 | 33 | 24  | 8  | 15 | 18 | 6  | 13 | 23 | 26 | 18 | 25 | 20 | 23 | 34 | 16 | 1  | 12  | 11  | 23 | 7  | 21 | 22  | 569 |
| OTU29 | 28  | 11 | 14 | 13  | 7  | 2  | 5  | 20 | 8  | 36  | 15 | 17 | 8  | 18 | 3  | 15 | 41 | 19 | 13 | 23 | 20 | 33 | 18 | 1  | 37  | 36  | 44 | 9  | 11 | 43  | 568 |
| OTU30 | 25  | 13 | 13 | 21  | 2  | 9  | 8  | 10 | 24 | 27  | 8  | 51 | 4  | 20 | 16 | 9  | 23 | 12 | 63 | 8  | 15 | 21 | 10 | 6  | 11  | 12  | 52 | 35 | 19 | 15  | 562 |
| OTU31 | 16  | 13 | 22 | 11  | 22 | 8  | 12 | 22 | 23 | 19  | 14 | 15 | 9  | 13 | 12 | 33 | 43 | 16 | 24 | 8  | 10 | 10 | 29 | 0  | 9   | 35  | 16 | 20 | 26 | 15  | 525 |
| OTU32 | 2   | 2  | 0  | 6   | 26 | 18 | 20 | 27 | 30 | 41  | 9  | 24 | 25 | 35 | 28 | 36 | 16 | 18 | 32 | 29 | 22 | 27 | 23 | 17 | 0   | 2   | 0  | 0  | 1  | 2   | 518 |
| OTU33 | 19  | 8  | 6  | 30  | 27 | 3  | 4  | 14 | 38 | 8   | 3  | 48 | 6  | 8  | 9  | 16 | 23 | 8  | 0  | 5  | 11 | 27 | 23 | 21 | 16  | 15  | 13 | 31 | 6  | 48  | 494 |
| OTU34 | 19  | 10 | 12 | 19  | 23 | 34 | 9  | 36 | 32 | 16  | 15 | 9  | 9  | 39 | 7  | 17 | 11 | 18 | 9  | 37 | 17 | 3  | 21 | 4  | 15  | 8   | 7  | 22 | 11 | 1   | 490 |
| OTU35 | 24  | 10 | 6  | 21  | 11 | 5  | 17 | 31 | 39 | 9   | 5  | 9  | 9  | 19 | 11 | 27 | 29 | 12 | 21 | 29 | 21 | 19 | 18 | 2  | 17  | 14  | 16 | 3  | 13 | 10  | 477 |
| OTU36 | 19  | 7  | 7  | 19  | 6  | 11 | 8  | 6  | 20 | 17  | 4  | 20 | 5  | 17 | 15 | 10 | 18 | 5  | 17 | 34 | 39 | 14 | 16 | 5  | 10  | 11  | 13 | 16 | 17 | 40  | 446 |
| OTU37 | 50  | 34 | 23 | 30  | 20 | 4  | 5  | 5  | 8  | 33  | 2  | 3  | 9  | 7  | 6  | 4  | 1  | 4  | 2  | 4  | 8  | 1  | 1  | 0  | 38  | 17  | 16 | 28 | 21 | 56  | 440 |
| OTU38 | 0   | 6  | 37 | 29  | 22 | 26 | 35 | 63 | 37 | 48  | 33 | 68 | 13 | 0  | 0  | 1  | 1  | 1  | 1  | 0  | 0  | 0  | 0  | 0  | 0   | 0   | 0  | 0  | 0  | 0   | 421 |
| OTU39 | 8   | 5  | 10 | 15  | 11 | 5  | 4  | 14 | 17 | 13  | 8  | 11 | 10 | 24 | 17 | 16 | 10 | 6  | 36 | 40 | 25 | 15 | 16 | 4  | 11  | 11  | 13 | 17 | 14 | 9   | 415 |
| OTU40 | 2   | 5  | 9  | 12  | 21 | 3  | 11 | 23 | 33 | 21  | 16 | 10 | 7  | 13 | 27 | 17 | 11 | 6  | 30 | 17 | 33 | 23 | 5  | 6  | 5   | 5   | 1  | 2  | 6  | 1   | 381 |
| OTU41 | 13  | 33 | 2  | 100 | 35 | 47 | 9  | 1  | 0  | 119 | 4  | 0  | 4  | 0  | 3  | 1  | 0  | 0  | 0  | 0  | 0  | 0  | 0  | 1  | 0   | 0   | 7  | 0  | 1  | 0   | 380 |

---

|       |    |    |    |    |    |    |    |    |    |    |    |    |    |    |    |    |    |    |    |    |    |    |    |   |    |    |    |    |    |    |     |
|-------|----|----|----|----|----|----|----|----|----|----|----|----|----|----|----|----|----|----|----|----|----|----|----|---|----|----|----|----|----|----|-----|
| OTU42 | 8  | 18 | 9  | 15 | 7  | 4  | 9  | 13 | 6  | 17 | 14 | 22 | 11 | 20 | 2  | 3  | 10 | 7  | 46 | 5  | 10 | 14 | 5  | 5 | 19 | 7  | 17 | 22 | 13 | 9  | 367 |
| OTU43 | 24 | 8  | 11 | 25 | 3  | 13 | 5  | 10 | 22 | 21 | 6  | 14 | 6  | 8  | 12 | 5  | 16 | 6  | 11 | 9  | 12 | 9  | 3  | 3 | 9  | 19 | 26 | 9  | 16 | 12 | 353 |
| OTU44 | 10 | 4  | 14 | 3  | 7  | 14 | 8  | 18 | 16 | 11 | 3  | 22 | 11 | 7  | 6  | 10 | 19 | 6  | 6  | 4  | 13 | 6  | 13 | 1 | 31 | 32 | 17 | 14 | 16 | 6  | 348 |
| OTU45 | 18 | 4  | 8  | 16 | 19 | 15 | 8  | 20 | 31 | 16 | 14 | 12 | 6  | 10 | 8  | 24 | 20 | 3  | 13 | 9  | 10 | 5  | 4  | 2 | 1  | 9  | 2  | 9  | 10 | 21 | 347 |
| OTU46 | 20 | 5  | 8  | 6  | 16 | 13 | 8  | 12 | 12 | 7  | 20 | 10 | 8  | 20 | 11 | 12 | 17 | 11 | 29 | 22 | 13 | 6  | 9  | 1 | 6  | 7  | 4  | 12 | 10 | 4  | 339 |
| OTU47 | 15 | 4  | 8  | 16 | 7  | 12 | 8  | 17 | 5  | 6  | 2  | 21 | 14 | 25 | 4  | 7  | 13 | 16 | 12 | 16 | 8  | 9  | 12 | 3 | 16 | 16 | 12 | 10 | 0  | 24 | 338 |
| OTU48 | 14 | 8  | 8  | 31 | 9  | 8  | 14 | 25 | 6  | 17 | 12 | 15 | 10 | 14 | 7  | 7  | 19 | 1  | 14 | 23 | 13 | 6  | 6  | 3 | 3  | 4  | 15 | 7  | 6  | 5  | 330 |
| OTU49 | 2  | 2  | 2  | 2  | 4  | 2  | 1  | 3  | 2  | 1  | 2  | 3  | 15 | 32 | 27 | 33 | 31 | 17 | 25 | 27 | 34 | 17 | 26 | 6 | 2  | 0  | 1  | 3  | 3  | 5  | 330 |
| OTU50 | 2  | 1  | 1  | 28 | 29 | 31 | 23 | 37 | 30 | 23 | 37 | 24 | 19 | 16 | 0  | 1  | 2  | 1  | 4  | 5  | 3  | 2  | 2  | 1 | 2  | 1  | 3  | 0  | 0  | 1  | 329 |
| OTU51 | 0  | 0  | 0  | 0  | 0  | 0  | 0  | 0  | 0  | 4  | 0  | 0  | 0  | 5  | 1  | 2  | 2  | 1  | 1  | 1  | 3  | 1  | 3  | 0 | 90 | 35 | 63 | 37 | 50 | 28 | 327 |
| OTU52 | 5  | 10 | 4  | 12 | 3  | 9  | 7  | 11 | 12 | 8  | 7  | 5  | 6  | 13 | 5  | 12 | 10 | 3  | 70 | 24 | 8  | 8  | 11 | 3 | 12 | 6  | 3  | 10 | 3  | 8  | 308 |
| OTU53 | 20 | 13 | 22 | 13 | 7  | 11 | 16 | 5  | 25 | 11 | 5  | 19 | 7  | 16 | 17 | 5  | 4  | 1  | 6  | 4  | 2  | 2  | 5  | 3 | 6  | 9  | 9  | 16 | 6  | 19 | 304 |
| OTU54 | 6  | 15 | 11 | 7  | 10 | 7  | 4  | 11 | 5  | 7  | 11 | 14 | 15 | 18 | 5  | 7  | 10 | 15 | 21 | 15 | 26 | 6  | 12 | 1 | 6  | 13 | 3  | 11 | 4  | 7  | 303 |
| OTU55 | 14 | 18 | 12 | 1  | 12 | 18 | 2  | 14 | 3  | 23 | 21 | 6  | 4  | 17 | 10 | 18 | 16 | 8  | 18 | 29 | 3  | 5  | 7  | 3 | 1  | 0  | 1  | 7  | 4  | 5  | 300 |
| OTU56 | 22 | 17 | 4  | 14 | 14 | 11 | 9  | 11 | 16 | 13 | 3  | 17 | 7  | 15 | 2  | 12 | 9  | 8  | 1  | 32 | 7  | 7  | 12 | 2 | 10 | 2  | 3  | 3  | 4  | 8  | 295 |
| OTU57 | 51 | 17 | 22 | 1  | 2  | 0  | 3  | 1  | 0  | 0  | 1  | 0  | 1  | 0  | 1  | 0  | 1  | 1  | 0  | 1  | 2  | 0  | 0  | 0 | 31 | 23 | 54 | 28 | 18 | 19 | 278 |
| OTU58 | 4  | 7  | 1  | 9  | 2  | 1  | 4  | 2  | 18 | 18 | 15 | 19 | 35 | 19 | 6  | 12 | 11 | 10 | 11 | 14 | 6  | 2  | 5  | 4 | 8  | 8  | 5  | 11 | 2  | 3  | 272 |
| OTU59 | 18 | 9  | 8  | 0  | 12 | 16 | 7  | 10 | 10 | 5  | 8  | 7  | 7  | 2  | 1  | 5  | 15 | 4  | 3  | 13 | 13 | 3  | 3  | 0 | 7  | 26 | 9  | 27 | 5  | 9  | 262 |
| OTU60 | 0  | 6  | 3  | 1  | 1  | 2  | 2  | 8  | 0  | 19 | 4  | 24 | 8  | 5  | 25 | 16 | 23 | 17 | 22 | 9  | 25 | 13 | 7  | 4 | 3  | 2  | 3  | 2  | 5  | 0  | 259 |
| OTU61 | 3  | 10 | 0  | 7  | 4  | 2  | 19 | 17 | 12 | 14 | 10 | 10 | 10 | 0  | 14 | 15 | 32 | 2  | 15 | 18 | 0  | 2  | 2  | 3 | 15 | 7  | 0  | 5  | 5  | 0  | 253 |
| OTU62 | 13 | 12 | 3  | 9  | 1  | 2  | 1  | 3  | 9  | 5  | 10 | 11 | 6  | 2  | 7  | 17 | 8  | 3  | 6  | 14 | 10 | 6  | 6  | 0 | 17 | 14 | 18 | 18 | 13 | 7  | 251 |
| OTU63 | 18 | 8  | 9  | 5  | 11 | 12 | 13 | 11 | 9  | 13 | 8  | 12 | 3  | 12 | 7  | 10 | 7  | 7  | 3  | 6  | 9  | 6  | 9  | 3 | 6  | 4  | 4  | 2  | 6  | 12 | 245 |
| OTU64 | 0  | 4  | 1  | 20 | 5  | 2  | 4  | 19 | 17 | 40 | 2  | 5  | 5  | 7  | 12 | 12 | 9  | 1  | 18 | 10 | 5  | 9  | 0  | 1 | 8  | 2  | 0  | 11 | 5  | 8  | 242 |
| OTU65 | 9  | 12 | 11 | 7  | 8  | 9  | 11 | 5  | 28 | 8  | 2  | 7  | 3  | 7  | 6  | 4  | 7  | 4  | 14 | 17 | 8  | 8  | 5  | 1 | 0  | 2  | 6  | 14 | 7  | 11 | 241 |
| OTU66 | 6  | 2  | 2  | 4  | 3  | 5  | 23 | 0  | 12 | 14 | 5  | 12 | 8  | 7  | 8  | 23 | 10 | 1  | 11 | 15 | 4  | 3  | 19 | 0 | 7  | 5  | 6  | 13 | 4  | 9  | 241 |
| OTU67 | 15 | 9  | 3  | 10 | 2  | 4  | 5  | 0  | 9  | 17 | 7  | 13 | 9  | 5  | 7  | 6  | 4  | 2  | 13 | 11 | 11 | 7  | 5  | 1 | 17 | 8  | 9  | 6  | 8  | 16 | 239 |

---

---

|       |    |    |    |    |    |    |    |    |    |    |    |    |    |    |    |    |    |    |    |    |    |    |    |   |    |    |    |    |    |    |     |
|-------|----|----|----|----|----|----|----|----|----|----|----|----|----|----|----|----|----|----|----|----|----|----|----|---|----|----|----|----|----|----|-----|
| OTU68 | 35 | 10 | 7  | 50 | 0  | 0  | 0  | 0  | 0  | 1  | 0  | 0  | 0  | 0  | 0  | 0  | 0  | 0  | 0  | 0  | 1  | 0  | 1  | 3 | 17 | 32 | 20 | 16 | 14 | 29 | 236 |
| OTU69 | 15 | 5  | 1  | 4  | 17 | 0  | 13 | 22 | 3  | 4  | 3  | 9  | 13 | 14 | 19 | 19 | 4  | 1  | 1  | 4  | 2  | 5  | 5  | 0 | 6  | 15 | 4  | 2  | 9  | 12 | 231 |
| OTU70 | 16 | 7  | 9  | 13 | 6  | 17 | 25 | 27 | 2  | 0  | 0  | 0  | 0  | 0  | 1  | 0  | 0  | 0  | 0  | 1  | 2  | 0  | 0  | 0 | 18 | 23 | 7  | 18 | 15 | 21 | 228 |
| OTU71 | 0  | 1  | 5  | 1  | 1  | 0  | 0  | 0  | 0  | 0  | 2  | 1  | 0  | 2  | 1  | 0  | 17 | 5  | 33 | 50 | 29 | 43 | 24 | 7 | 0  | 1  | 0  | 2  | 1  | 2  | 228 |
| OTU72 | 43 | 2  | 14 | 3  | 5  | 8  | 3  | 7  | 17 | 8  | 1  | 8  | 3  | 8  | 11 | 11 | 13 | 8  | 9  | 3  | 13 | 2  | 3  | 0 | 0  | 1  | 4  | 1  | 8  | 11 | 228 |
| OTU73 | 7  | 22 | 8  | 20 | 15 | 29 | 12 | 33 | 27 | 3  | 0  | 1  | 0  | 0  | 1  | 0  | 0  | 0  | 0  | 0  | 0  | 0  | 1  | 0 | 0  | 0  | 1  | 0  | 19 | 26 | 225 |
| OTU74 | 2  | 5  | 3  | 4  | 1  | 8  | 2  | 4  | 4  | 1  | 3  | 9  | 3  | 3  | 5  | 5  | 11 | 1  | 11 | 28 | 19 | 23 | 26 | 4 | 4  | 4  | 5  | 7  | 10 | 9  | 224 |
| OTU75 | 10 | 2  | 2  | 8  | 13 | 11 | 0  | 14 | 12 | 30 | 4  | 3  | 4  | 4  | 8  | 6  | 6  | 8  | 13 | 6  | 13 | 2  | 9  | 1 | 13 | 2  | 2  | 5  | 4  | 2  | 217 |
| OTU76 | 6  | 8  | 2  | 10 | 3  | 5  | 14 | 19 | 2  | 10 | 10 | 2  | 13 | 12 | 4  | 3  | 3  | 9  | 11 | 16 | 1  | 4  | 4  | 1 | 5  | 7  | 8  | 6  | 11 | 6  | 215 |
| OTU77 | 7  | 18 | 1  | 14 | 10 | 3  | 0  | 1  | 5  | 0  | 1  | 17 | 3  | 5  | 9  | 2  | 7  | 0  | 25 | 4  | 5  | 4  | 0  | 2 | 29 | 8  | 17 | 7  | 2  | 6  | 212 |
| OTU78 | 7  | 8  | 3  | 4  | 0  | 9  | 10 | 6  | 9  | 0  | 0  | 20 | 20 | 8  | 20 | 11 | 2  | 1  | 8  | 1  | 4  | 13 | 2  | 1 | 0  | 2  | 14 | 5  | 13 | 9  | 210 |
| OTU79 | 2  | 1  | 1  | 0  | 10 | 8  | 0  | 10 | 1  | 10 | 1  | 18 | 2  | 12 | 3  | 1  | 7  | 0  | 6  | 20 | 5  | 11 | 4  | 3 | 12 | 13 | 8  | 26 | 7  | 5  | 207 |
| OTU80 | 12 | 9  | 1  | 0  | 0  | 0  | 0  | 0  | 7  | 0  | 5  | 11 | 1  | 12 | 3  | 8  | 9  | 5  | 4  | 3  | 6  | 7  | 6  | 2 | 14 | 10 | 21 | 22 | 19 | 10 | 207 |
| OTU81 | 0  | 1  | 0  | 0  | 26 | 39 | 9  | 14 | 33 | 36 | 0  | 2  | 1  | 5  | 4  | 0  | 3  | 1  | 9  | 11 | 0  | 4  | 3  | 1 | 0  | 0  | 0  | 0  | 0  | 0  | 202 |
| OTU82 | 4  | 6  | 9  | 1  | 11 | 8  | 1  | 8  | 5  | 6  | 1  | 5  | 5  | 14 | 3  | 9  | 8  | 10 | 13 | 10 | 14 | 4  | 5  | 4 | 5  | 2  | 2  | 11 | 12 | 4  | 200 |
| OTU83 | 2  | 2  | 7  | 11 | 2  | 13 | 8  | 6  | 1  | 3  | 6  | 2  | 5  | 4  | 12 | 13 | 14 | 2  | 13 | 21 | 6  | 8  | 5  | 4 | 4  | 5  | 5  | 5  | 9  | 1  | 199 |
| OTU84 | 7  | 10 | 14 | 4  | 6  | 5  | 2  | 11 | 4  | 13 | 2  | 6  | 2  | 11 | 11 | 5  | 15 | 5  | 11 | 11 | 7  | 5  | 1  | 4 | 3  | 5  | 11 | 3  | 3  | 2  | 199 |
| OTU85 | 16 | 9  | 0  | 6  | 2  | 10 | 5  | 5  | 3  | 14 | 7  | 15 | 7  | 11 | 6  | 0  | 6  | 3  | 6  | 8  | 5  | 5  | 12 | 1 | 3  | 3  | 10 | 8  | 2  | 9  | 197 |
| OTU86 | 4  | 5  | 4  | 4  | 2  | 6  | 3  | 5  | 6  | 1  | 1  | 3  | 4  | 4  | 7  | 1  | 2  | 1  | 2  | 34 | 43 | 9  | 22 | 4 | 4  | 2  | 0  | 7  | 3  | 4  | 197 |
| OTU87 | 0  | 0  | 0  | 11 | 17 | 15 | 14 | 20 | 48 | 14 | 16 | 18 | 0  | 0  | 0  | 0  | 5  | 1  | 0  | 0  | 4  | 0  | 0  | 0 | 0  | 0  | 0  | 0  | 0  | 0  | 183 |
| OTU88 | 15 | 1  | 1  | 21 | 10 | 6  | 7  | 14 | 8  | 2  | 8  | 3  | 2  | 10 | 0  | 9  | 11 | 0  | 16 | 0  | 2  | 4  | 5  | 0 | 1  | 4  | 4  | 8  | 7  | 3  | 182 |
| OTU89 | 10 | 7  | 3  | 1  | 5  | 1  | 3  | 4  | 5  | 10 | 12 | 5  | 2  | 4  | 4  | 2  | 9  | 3  | 7  | 8  | 7  | 7  | 5  | 1 | 2  | 2  | 12 | 6  | 10 | 14 | 171 |
| OTU90 | 0  | 0  | 0  | 0  | 0  | 0  | 0  | 0  | 0  | 0  | 0  | 0  | 0  | 20 | 40 | 28 | 23 | 53 | 0  | 0  | 0  | 0  | 0  | 0 | 0  | 0  | 0  | 0  | 0  | 0  | 164 |
| OTU91 | 15 | 6  | 4  | 11 | 1  | 1  | 2  | 5  | 1  | 6  | 2  | 4  | 4  | 5  | 8  | 7  | 9  | 5  | 5  | 5  | 8  | 1  | 3  | 0 | 3  | 4  | 8  | 8  | 9  | 6  | 156 |
| OTU92 | 0  | 0  | 0  | 1  | 0  | 0  | 3  | 11 | 6  | 3  | 8  | 17 | 3  | 6  | 12 | 21 | 2  | 2  | 29 | 9  | 10 | 5  | 6  | 0 | 0  | 1  | 0  | 0  | 0  | 0  | 155 |
| OTU93 | 25 | 1  | 2  | 3  | 4  | 8  | 6  | 10 | 7  | 13 | 3  | 10 | 1  | 3  | 2  | 8  | 4  | 1  | 1  | 2  | 3  | 0  | 0  | 1 | 11 | 7  | 1  | 4  | 4  | 7  | 152 |

---

|        |    |    |    |    |   |    |    |    |    |    |    |    |    |    |    |    |    |   |    |    |    |    |    |   |    |    |    |    |    |     |     |
|--------|----|----|----|----|---|----|----|----|----|----|----|----|----|----|----|----|----|---|----|----|----|----|----|---|----|----|----|----|----|-----|-----|
| OTU94  | 35 | 22 | 18 | 19 | 0 | 0  | 4  | 0  | 0  | 0  | 0  | 1  | 0  | 0  | 0  | 0  | 0  | 0 | 0  | 0  | 1  | 0  | 0  | 0 | 0  | 0  | 18 | 22 | 10 | 150 |     |
| OTU95  | 5  | 6  | 5  | 6  | 2 | 7  | 11 | 8  | 3  | 1  | 6  | 3  | 7  | 2  | 5  | 5  | 6  | 4 | 7  | 4  | 7  | 3  | 5  | 0 | 3  | 4  | 7  | 13 | 2  | 2   | 149 |
| OTU96  | 11 | 3  | 0  | 3  | 7 | 6  | 4  | 5  | 6  | 2  | 3  | 4  | 6  | 8  | 12 | 6  | 7  | 4 | 4  | 3  | 4  | 3  | 3  | 3 | 7  | 6  | 6  | 3  | 6  | 2   | 147 |
| OTU97  | 6  | 2  | 0  | 1  | 6 | 8  | 7  | 5  | 8  | 2  | 5  | 6  | 5  | 6  | 7  | 6  | 9  | 5 | 4  | 7  | 8  | 3  | 4  | 1 | 2  | 5  | 1  | 10 | 4  | 4   | 147 |
| OTU98  | 0  | 0  | 1  | 0  | 1 | 4  | 0  | 1  | 2  | 0  | 0  | 1  | 15 | 8  | 25 | 18 | 26 | 6 | 9  | 6  | 9  | 4  | 5  | 0 | 0  | 1  | 0  | 2  | 1  | 2   | 147 |
| OTU99  | 1  | 4  | 2  | 1  | 2 | 0  | 9  | 11 | 2  | 2  | 4  | 3  | 3  | 6  | 3  | 3  | 9  | 0 | 11 | 5  | 23 | 12 | 5  | 1 | 1  | 2  | 9  | 2  | 8  | 2   | 146 |
| OTU100 | 12 | 7  | 5  | 13 | 6 | 4  | 7  | 11 | 8  | 1  | 0  | 0  | 2  | 10 | 3  | 0  | 2  | 0 | 1  | 6  | 1  | 1  | 5  | 0 | 10 | 4  | 11 | 2  | 4  | 9   | 145 |
| OTU101 | 6  | 6  | 1  | 0  | 5 | 7  | 13 | 1  | 6  | 4  | 1  | 11 | 2  | 4  | 1  | 5  | 4  | 5 | 0  | 13 | 1  | 2  | 5  | 0 | 12 | 13 | 14 | 2  | 1  | 0   | 145 |
| OTU102 | 0  | 0  | 12 | 1  | 0 | 9  | 0  | 6  | 8  | 4  | 6  | 4  | 7  | 18 | 2  | 2  | 3  | 1 | 22 | 1  | 4  | 4  | 1  | 0 | 9  | 3  | 6  | 1  | 0  | 10  | 144 |
| OTU103 | 11 | 4  | 5  | 7  | 4 | 2  | 7  | 13 | 8  | 5  | 1  | 4  | 4  | 2  | 8  | 4  | 3  | 0 | 1  | 2  | 4  | 2  | 3  | 0 | 5  | 10 | 6  | 1  | 12 | 3   | 141 |
| OTU104 | 31 | 0  | 4  | 3  | 3 | 2  | 2  | 3  | 4  | 19 | 1  | 4  | 2  | 3  | 1  | 2  | 4  | 1 | 2  | 8  | 2  | 1  | 1  | 1 | 0  | 0  | 4  | 9  | 7  | 16  | 140 |
| OTU105 | 0  | 0  | 0  | 0  | 0 | 16 | 13 | 18 | 19 | 25 | 13 | 31 | 1  | 1  | 0  | 1  | 0  | 0 | 0  | 0  | 1  | 0  | 0  | 0 | 0  | 0  | 0  | 0  | 0  | 0   | 139 |
| OTU106 | 2  | 5  | 5  | 1  | 3 | 3  | 3  | 1  | 1  | 2  | 2  | 4  | 4  | 7  | 2  | 4  | 2  | 3 | 8  | 8  | 13 | 6  | 2  | 2 | 4  | 10 | 12 | 1  | 3  | 13  | 136 |
| OTU107 | 17 | 0  | 3  | 8  | 0 | 11 | 3  | 3  | 5  | 0  | 3  | 4  | 5  | 2  | 7  | 2  | 4  | 0 | 8  | 4  | 6  | 1  | 3  | 1 | 3  | 3  | 10 | 4  | 4  | 9   | 133 |
| OTU108 | 1  | 0  | 0  | 3  | 1 | 2  | 0  | 0  | 1  | 11 | 4  | 6  | 6  | 10 | 17 | 18 | 7  | 6 | 4  | 12 | 9  | 2  | 11 | 0 | 0  | 1  | 0  | 0  | 0  | 0   | 132 |
| OTU109 | 0  | 0  | 2  | 9  | 9 | 2  | 0  | 8  | 12 | 0  | 3  | 6  | 5  | 8  | 1  | 2  | 3  | 7 | 0  | 5  | 6  | 0  | 2  | 5 | 4  | 2  | 11 | 8  | 4  | 8   | 132 |
| OTU110 | 14 | 11 | 3  | 5  | 8 | 4  | 4  | 5  | 7  | 3  | 2  | 3  | 2  | 0  | 0  | 0  | 0  | 7 | 3  | 0  | 2  | 5  | 8  | 1 | 4  | 6  | 9  | 12 | 0  | 0   | 128 |
| OTU111 | 11 | 13 | 1  | 2  | 0 | 0  | 2  | 11 | 0  | 0  | 1  | 2  | 2  | 2  | 12 | 10 | 13 | 0 | 0  | 13 | 13 | 4  | 1  | 0 | 4  | 2  | 2  | 1  | 2  | 2   | 126 |
| OTU112 | 8  | 1  | 5  | 3  | 5 | 2  | 2  | 2  | 7  | 6  | 1  | 15 | 8  | 6  | 17 | 17 | 7  | 2 | 11 | 0  | 0  | 0  | 0  | 0 | 0  | 0  | 0  | 0  | 0  | 0   | 125 |
| OTU113 | 8  | 12 | 4  | 4  | 2 | 3  | 2  | 2  | 8  | 2  | 1  | 5  | 2  | 4  | 5  | 3  | 10 | 3 | 7  | 5  | 3  | 1  | 0  | 0 | 7  | 1  | 7  | 10 | 2  | 2   | 125 |
| OTU114 | 16 | 5  | 5  | 7  | 8 | 1  | 6  | 0  | 20 | 6  | 0  | 4  | 0  | 1  | 3  | 0  | 2  | 2 | 3  | 3  | 5  | 2  | 3  | 0 | 3  | 5  | 6  | 3  | 0  | 5   | 124 |
| OTU115 | 5  | 3  | 2  | 0  | 3 | 5  | 1  | 5  | 11 | 5  | 4  | 1  | 6  | 16 | 3  | 1  | 3  | 1 | 5  | 8  | 5  | 5  | 5  | 1 | 5  | 5  | 2  | 3  | 2  | 2   | 123 |
| OTU116 | 3  | 0  | 1  | 0  | 1 | 3  | 1  | 17 | 22 | 0  | 1  | 2  | 7  | 0  | 0  | 0  | 2  | 1 | 4  | 2  | 2  | 2  | 0  | 2 | 5  | 7  | 0  | 0  | 21 | 15  | 121 |
| OTU117 | 12 | 0  | 5  | 5  | 1 | 12 | 2  | 7  | 0  | 3  | 0  | 5  | 3  | 1  | 6  | 3  | 4  | 5 | 1  | 7  | 7  | 1  | 3  | 1 | 0  | 4  | 4  | 0  | 1  | 16  | 119 |
| OTU118 | 3  | 6  | 6  | 7  | 2 | 3  | 0  | 7  | 0  | 7  | 3  | 1  | 2  | 7  | 7  | 9  | 2  | 3 | 2  | 9  | 3  | 5  | 8  | 0 | 4  | 0  | 0  | 6  | 6  | 1   | 119 |
| OTU119 | 27 | 0  | 7  | 1  | 5 | 7  | 0  | 3  | 4  | 5  | 3  | 5  | 1  | 3  | 3  | 3  | 1  | 0 | 4  | 6  | 5  | 5  | 1  | 0 | 2  | 2  | 3  | 4  | 4  | 4   | 118 |



|        |    |    |   |    |    |    |    |    |    |    |   |    |   |    |    |    |    |   |    |    |    |    |    |   |   |    |    |    |    |    |     |    |
|--------|----|----|---|----|----|----|----|----|----|----|---|----|---|----|----|----|----|---|----|----|----|----|----|---|---|----|----|----|----|----|-----|----|
| OTU120 | 10 | 6  | 3 | 0  | 1  | 1  | 0  | 2  | 7  | 5  | 0 | 1  | 2 | 1  | 2  | 3  | 3  | 3 | 7  | 2  | 4  | 2  | 5  | 1 | 4 | 5  | 5  | 6  | 15 | 9  | 115 |    |
| OTU121 | 13 | 3  | 6 | 5  | 4  | 4  | 4  | 6  | 5  | 5  | 0 | 1  | 6 | 3  | 2  | 3  | 7  | 1 | 2  | 6  | 5  | 1  | 1  | 1 | 3 | 3  | 3  | 5  | 4  | 3  | 115 |    |
| OTU122 | 12 | 6  | 2 | 5  | 11 | 2  | 7  | 3  | 6  | 0  | 0 | 10 | 2 | 0  | 9  | 1  | 0  | 2 | 0  | 10 | 5  | 3  | 3  | 0 | 5 | 3  | 0  | 5  | 0  | 3  | 115 |    |
| OTU123 | 4  | 3  | 5 | 4  | 5  | 3  | 2  | 3  | 6  | 0  | 3 | 1  | 1 | 7  | 3  | 5  | 6  | 2 | 3  | 10 | 2  | 2  | 7  | 3 | 6 | 2  | 9  | 3  | 2  | 2  | 114 |    |
| OTU124 | 13 | 1  | 3 | 1  | 3  | 4  | 8  | 5  | 7  | 3  | 2 | 6  | 3 | 4  | 5  | 4  | 3  | 1 | 4  | 6  | 9  | 0  | 5  | 1 | 2 | 3  | 3  | 2  | 2  | 1  | 114 |    |
| OTU125 | 2  | 0  | 3 | 1  | 4  | 0  | 2  | 26 | 12 | 0  | 4 | 7  | 5 | 3  | 3  | 0  | 11 | 0 | 4  | 4  | 1  | 0  | 9  | 0 | 0 | 2  | 5  | 0  | 2  | 2  | 112 |    |
| OTU126 | 1  | 4  | 5 | 0  | 1  | 4  | 1  | 3  | 6  | 1  | 4 | 2  | 1 | 2  | 10 | 1  | 7  | 6 | 8  | 2  | 5  | 12 | 5  | 1 | 0 | 6  | 0  | 0  | 12 | 1  | 111 |    |
| OTU127 | 1  | 3  | 0 | 4  | 0  | 6  | 1  | 3  | 4  | 3  | 5 | 10 | 1 | 2  | 2  | 4  | 6  | 3 | 7  | 3  | 2  | 4  | 3  | 2 | 1 | 11 | 7  | 3  | 0  | 8  | 109 |    |
| OTU128 | 5  | 0  | 0 | 11 | 6  | 7  | 1  | 5  | 1  | 0  | 0 | 3  | 1 | 14 | 4  | 0  | 6  | 6 | 0  | 5  | 5  | 0  | 1  | 0 | 9 | 2  | 13 | 0  | 2  | 1  | 108 |    |
| OTU129 | 4  | 2  | 3 | 6  | 1  | 10 | 8  | 4  | 5  | 3  | 6 | 3  | 0 | 2  | 11 | 4  | 1  | 1 | 1  | 7  | 3  | 5  | 1  | 0 | 1 | 2  | 4  | 2  | 4  | 2  | 106 |    |
| OTU130 | 4  | 2  | 9 | 2  | 2  | 0  | 16 | 6  | 3  | 1  | 2 | 2  | 4 | 2  | 2  | 4  | 4  | 1 | 4  | 3  | 0  | 3  | 5  | 1 | 1 | 10 | 2  | 4  | 0  | 5  | 104 |    |
| OTU131 | 10 | 5  | 1 | 3  | 2  | 1  | 7  | 3  | 2  | 4  | 2 | 3  | 3 | 4  | 2  | 2  | 4  | 2 | 4  | 2  | 4  | 2  | 5  | 0 | 0 | 3  | 10 | 10 | 1  | 3  | 104 |    |
| OTU132 | 1  | 3  | 2 | 0  | 0  | 1  | 1  | 4  | 3  | 5  | 1 | 5  | 1 | 1  | 4  | 0  | 2  | 2 | 1  | 0  | 1  | 2  | 0  | 0 | 9 | 12 | 9  | 6  | 9  | 19 | 104 |    |
| OTU133 | 5  | 2  | 2 | 4  | 1  | 5  | 0  | 8  | 0  | 4  | 0 | 13 | 9 | 1  | 5  | 6  | 2  | 1 | 5  | 1  | 1  | 1  | 1  | 3 | 4 | 1  | 6  | 2  | 1  | 9  | 103 |    |
| OTU134 | 12 | 0  | 2 | 4  | 4  | 6  | 0  | 2  | 5  | 4  | 0 | 8  | 1 | 10 | 2  | 0  | 2  | 0 | 0  | 1  | 3  | 2  | 7  | 2 | 0 | 0  | 4  | 13 | 1  | 6  | 101 |    |
| OTU135 | 4  | 2  | 2 | 0  | 3  | 2  | 3  | 3  | 6  | 3  | 0 | 0  | 6 | 9  | 7  | 1  | 4  | 2 | 4  | 4  | 6  | 2  | 1  | 0 | 7 | 2  | 14 | 0  | 0  | 1  | 98  |    |
| OTU136 | 1  | 0  | 0 | 0  | 0  | 0  | 0  | 0  | 0  | 0  | 0 | 3  | 0 | 9  | 5  | 12 | 4  | 1 | 18 | 16 | 16 | 5  | 7  | 0 | 0 | 0  | 0  | 0  | 0  | 0  | 97  |    |
| OTU137 | 10 | 4  | 1 | 10 | 1  | 5  | 0  | 0  | 0  | 8  | 0 | 0  | 2 | 2  | 1  | 0  | 0  | 0 | 3  | 1  | 5  | 0  | 4  | 0 | 6 | 7  | 4  | 11 | 3  | 8  | 96  |    |
| OTU138 | 7  | 5  | 2 | 1  | 0  | 0  | 0  | 1  | 5  | 4  | 2 | 7  | 2 | 4  | 9  | 1  | 4  | 0 | 3  | 1  | 5  | 5  | 1  | 0 | 2 | 4  | 1  | 6  | 6  | 7  | 95  |    |
| OTU139 | 13 | 20 | 7 | 22 | 4  | 5  | 1  | 0  | 0  | 0  | 0 | 0  | 0 | 0  | 0  | 0  | 0  | 0 | 0  | 0  | 0  | 0  | 0  | 0 | 0 | 0  | 0  | 13 | 1  | 2  | 6   | 94 |
| OTU140 | 4  | 0  | 1 | 3  | 0  | 1  | 3  | 9  | 6  | 1  | 0 | 1  | 5 | 4  | 1  | 3  | 7  | 1 | 0  | 5  | 6  | 8  | 1  | 1 | 0 | 2  | 8  | 1  | 6  | 2  | 90  |    |
| OTU141 | 0  | 0  | 0 | 0  | 0  | 5  | 3  | 0  | 1  | 0  | 3 | 2  | 0 | 0  | 1  | 14 | 11 | 2 | 12 | 6  | 8  | 4  | 14 | 0 | 0 | 0  | 0  | 1  | 1  | 2  | 90  |    |
| OTU142 | 2  | 7  | 0 | 9  | 8  | 2  | 0  | 3  | 1  | 0  | 0 | 0  | 0 | 8  | 0  | 4  | 11 | 2 | 0  | 0  | 0  | 0  | 0  | 0 | 1 | 5  | 7  | 6  | 3  | 9  | 88  |    |
| OTU143 | 0  | 1  | 0 | 0  | 2  | 0  | 0  | 15 | 8  | 11 | 0 | 17 | 1 | 3  | 1  | 9  | 2  | 0 | 0  | 2  | 0  | 8  | 6  | 0 | 0 | 0  | 2  | 0  | 0  | 0  | 88  |    |
| OTU144 | 12 | 0  | 0 | 5  | 1  | 10 | 1  | 8  | 0  | 2  | 8 | 1  | 0 | 2  | 7  | 5  | 2  | 1 | 1  | 3  | 0  | 0  | 2  | 0 | 0 | 4  | 0  | 3  | 7  | 2  | 87  |    |
| OTU145 | 17 | 0  | 3 | 4  | 2  | 7  | 4  | 1  | 1  | 0  | 0 | 8  | 0 | 1  | 2  | 0  | 5  | 0 | 2  | 2  | 4  | 2  | 0  | 0 | 1 | 0  | 1  | 2  | 5  | 13 | 87  |    |

|        |    |   |   |    |   |   |   |    |   |    |    |   |    |   |    |    |    |   |    |    |    |   |   |   |    |   |   |   |    |    |    |
|--------|----|---|---|----|---|---|---|----|---|----|----|---|----|---|----|----|----|---|----|----|----|---|---|---|----|---|---|---|----|----|----|
| OTU146 | 13 | 0 | 3 | 1  | 1 | 1 | 1 | 2  | 6 | 4  | 3  | 2 | 3  | 4 | 3  | 1  | 3  | 4 | 4  | 5  | 2  | 0 | 2 | 0 | 6  | 0 | 1 | 0 | 5  | 6  | 86 |
| OTU147 | 0  | 3 | 1 | 5  | 2 | 6 | 7 | 15 | 2 | 2  | 2  | 5 | 1  | 8 | 8  | 7  | 8  | 3 | 0  | 0  | 0  | 0 | 0 | 0 | 0  | 0 | 0 | 1 | 0  | 86 |    |
| OTU148 | 7  | 3 | 4 | 3  | 5 | 1 | 7 | 5  | 8 | 4  | 2  | 0 | 2  | 1 | 0  | 5  | 2  | 2 | 0  | 2  | 1  | 2 | 2 | 0 | 3  | 3 | 5 | 3 | 1  | 3  | 86 |
| OTU149 | 6  | 3 | 2 | 3  | 5 | 7 | 4 | 1  | 0 | 2  | 1  | 2 | 2  | 7 | 7  | 6  | 1  | 3 | 2  | 1  | 2  | 2 | 0 | 1 | 2  | 5 | 3 | 1 | 4  | 0  | 85 |
| OTU150 | 1  | 5 | 7 | 4  | 9 | 4 | 2 | 6  | 2 | 2  | 1  | 4 | 0  | 1 | 1  | 2  | 0  | 1 | 2  | 11 | 5  | 2 | 3 | 0 | 3  | 0 | 3 | 3 | 1  | 0  | 85 |
| OTU151 | 9  | 2 | 1 | 2  | 1 | 4 | 3 | 5  | 4 | 4  | 1  | 0 | 4  | 3 | 3  | 5  | 3  | 3 | 1  | 2  | 2  | 1 | 6 | 0 | 1  | 1 | 4 | 3 | 2  | 2  | 82 |
| OTU152 | 3  | 0 | 4 | 6  | 1 | 3 | 1 | 5  | 0 | 4  | 0  | 1 | 4  | 3 | 5  | 3  | 7  | 1 | 6  | 6  | 3  | 5 | 2 | 1 | 2  | 0 | 2 | 0 | 3  | 1  | 82 |
| OTU153 | 5  | 0 | 4 | 3  | 1 | 2 | 1 | 3  | 1 | 3  | 0  | 6 | 2  | 6 | 4  | 1  | 0  | 1 | 2  | 3  | 8  | 3 | 6 | 1 | 6  | 0 | 3 | 2 | 2  | 3  | 82 |
| OTU154 | 2  | 0 | 0 | 1  | 1 | 1 | 2 | 4  | 1 | 2  | 2  | 0 | 2  | 0 | 0  | 2  | 4  | 4 | 1  | 4  | 2  | 1 | 2 | 1 | 27 | 8 | 3 | 4 | 0  | 0  | 81 |
| OTU155 | 4  | 0 | 0 | 5  | 6 | 3 | 3 | 2  | 1 | 2  | 2  | 6 | 4  | 6 | 1  | 7  | 1  | 1 | 9  | 1  | 2  | 1 | 5 | 3 | 2  | 1 | 0 | 0 | 1  | 1  | 80 |
| OTU156 | 0  | 0 | 0 | 2  | 1 | 4 | 2 | 0  | 0 | 6  | 0  | 3 | 2  | 0 | 7  | 11 | 11 | 4 | 9  | 0  | 3  | 2 | 0 | 0 | 0  | 0 | 8 | 2 | 0  | 0  | 77 |
| OTU157 | 0  | 0 | 0 | 3  | 4 | 4 | 4 | 3  | 0 | 2  | 1  | 6 | 5  | 3 | 1  | 9  | 3  | 0 | 4  | 6  | 0  | 2 | 0 | 0 | 5  | 5 | 0 | 3 | 2  | 2  | 77 |
| OTU158 | 4  | 0 | 1 | 1  | 0 | 0 | 2 | 13 | 2 | 4  | 0  | 0 | 10 | 0 | 6  | 10 | 7  | 2 | 0  | 5  | 2  | 2 | 0 | 0 | 0  | 0 | 4 | 0 | 0  | 1  | 76 |
| OTU159 | 2  | 4 | 3 | 3  | 3 | 0 | 5 | 2  | 6 | 0  | 1  | 2 | 0  | 0 | 12 | 5  | 3  | 0 | 0  | 1  | 9  | 0 | 0 | 4 | 3  | 5 | 0 | 1 | 2  | 0  | 76 |
| OTU160 | 2  | 0 | 3 | 2  | 6 | 0 | 4 | 1  | 1 | 3  | 0  | 5 | 3  | 4 | 0  | 2  | 4  | 2 | 4  | 1  | 3  | 2 | 2 | 0 | 1  | 2 | 4 | 6 | 4  | 3  | 74 |
| OTU161 | 0  | 0 | 1 | 4  | 0 | 2 | 0 | 4  | 2 | 2  | 0  | 0 | 1  | 0 | 6  | 3  | 0  | 3 | 6  | 17 | 4  | 9 | 0 | 0 | 0  | 0 | 0 | 0 | 0  | 10 | 74 |
| OTU162 | 0  | 0 | 0 | 0  | 2 | 4 | 1 | 3  | 3 | 0  | 3  | 5 | 6  | 5 | 6  | 2  | 0  | 4 | 4  | 7  | 2  | 0 | 2 | 2 | 0  | 2 | 0 | 4 | 2  | 4  | 73 |
| OTU163 | 16 | 0 | 6 | 1  | 9 | 0 | 2 | 0  | 0 | 10 | 2  | 0 | 0  | 0 | 0  | 0  | 0  | 0 | 4  | 0  | 0  | 0 | 0 | 0 | 0  | 5 | 9 | 2 | 6  | 0  | 72 |
| OTU164 | 0  | 0 | 0 | 0  | 0 | 0 | 0 | 6  | 1 | 0  | 10 | 0 | 5  | 0 | 0  | 9  | 0  | 3 | 0  | 5  | 18 | 0 | 0 | 0 | 15 | 0 | 0 | 0 | 0  | 0  | 72 |
| OTU165 | 3  | 3 | 2 | 1  | 0 | 4 | 2 | 3  | 7 | 0  | 2  | 1 | 1  | 4 | 4  | 1  | 3  | 1 | 11 | 3  | 5  | 1 | 4 | 0 | 0  | 0 | 0 | 0 | 0  | 6  | 72 |
| OTU166 | 0  | 5 | 0 | 11 | 0 | 0 | 0 | 4  | 0 | 0  | 1  | 0 | 1  | 6 | 0  | 2  | 1  | 0 | 11 | 7  | 1  | 4 | 0 | 3 | 7  | 2 | 0 | 2 | 4  | 0  | 72 |
| OTU167 | 7  | 5 | 0 | 8  | 0 | 0 | 6 | 0  | 0 | 4  | 1  | 0 | 0  | 0 | 0  | 2  | 0  | 0 | 0  | 0  | 0  | 2 | 0 | 0 | 6  | 0 | 2 | 3 | 10 | 15 | 71 |
| OTU168 | 3  | 4 | 0 | 6  | 1 | 7 | 3 | 6  | 3 | 3  | 2  | 4 | 1  | 2 | 1  | 3  | 2  | 0 | 3  | 6  | 2  | 1 | 1 | 0 | 0  | 1 | 0 | 1 | 2  | 3  | 71 |
| OTU169 | 1  | 0 | 1 | 1  | 1 | 2 | 0 | 6  | 6 | 14 | 0  | 3 | 4  | 1 | 0  | 4  | 4  | 0 | 0  | 3  | 0  | 0 | 1 | 2 | 0  | 0 | 2 | 3 | 8  | 4  | 71 |
| OTU170 | 7  | 1 | 1 | 2  | 3 | 4 | 3 | 3  | 1 | 3  | 2  | 0 | 4  | 3 | 0  | 3  | 2  | 0 | 3  | 1  | 5  | 1 | 0 | 0 | 2  | 2 | 3 | 0 | 4  | 7  | 70 |
| OTU171 | 1  | 1 | 1 | 1  | 3 | 1 | 2 | 4  | 5 | 2  | 2  | 0 | 1  | 7 | 3  | 12 | 4  | 0 | 1  | 3  | 3  | 0 | 2 | 0 | 3  | 2 | 3 | 1 | 1  | 1  | 70 |

|        |    |   |   |    |    |   |   |   |    |    |   |    |   |    |   |   |    |   |    |    |    |    |    |   |    |   |    |   |   |    |    |    |
|--------|----|---|---|----|----|---|---|---|----|----|---|----|---|----|---|---|----|---|----|----|----|----|----|---|----|---|----|---|---|----|----|----|
| OTU172 | 4  | 1 | 3 | 0  | 1  | 3 | 6 | 0 | 2  | 2  | 6 | 2  | 0 | 3  | 6 | 5 | 2  | 1 | 4  | 7  | 1  | 1  | 0  | 0 | 3  | 1 | 0  | 2 | 2 | 2  | 2  | 70 |
| OTU173 | 1  | 2 | 0 | 7  | 2  | 3 | 7 | 3 | 1  | 6  | 1 | 5  | 0 | 4  | 2 | 0 | 8  | 0 | 2  | 3  | 3  | 0  | 1  | 0 | 1  | 3 | 3  | 0 | 0 | 1  | 69 |    |
| OTU174 | 3  | 0 | 0 | 0  | 0  | 5 | 0 | 1 | 0  | 2  | 0 | 22 | 7 | 5  | 0 | 0 | 4  | 8 | 1  | 0  | 0  | 0  | 0  | 0 | 4  | 0 | 0  | 0 | 0 | 7  | 69 |    |
| OTU175 | 2  | 1 | 0 | 4  | 0  | 1 | 3 | 4 | 11 | 2  | 0 | 0  | 2 | 3  | 7 | 1 | 4  | 1 | 1  | 1  | 0  | 0  | 3  | 2 | 4  | 4 | 2  | 2 | 1 | 2  | 68 |    |
| OTU176 | 2  | 9 | 0 | 5  | 1  | 0 | 8 | 0 | 1  | 0  | 2 | 2  | 1 | 1  | 1 | 2 | 1  | 0 | 4  | 2  | 1  | 5  | 0  | 0 | 4  | 1 | 1  | 2 | 4 | 8  | 68 |    |
| OTU177 | 0  | 0 | 0 | 0  | 0  | 0 | 0 | 0 | 0  | 0  | 0 | 1  | 0 | 0  | 0 | 0 | 0  | 0 | 4  | 26 | 5  | 13 | 12 | 5 | 0  | 0 | 0  | 1 | 0 | 0  | 67 |    |
| OTU178 | 2  | 4 | 0 | 6  | 4  | 0 | 0 | 6 | 5  | 1  | 0 | 0  | 2 | 3  | 0 | 1 | 2  | 1 | 1  | 5  | 4  | 0  | 2  | 0 | 1  | 0 | 4  | 1 | 1 | 11 | 67 |    |
| OTU179 | 3  | 2 | 0 | 0  | 4  | 1 | 0 | 8 | 0  | 1  | 0 | 3  | 0 | 1  | 0 | 9 | 3  | 0 | 0  | 0  | 2  | 3  | 7  | 0 | 0  | 2 | 2  | 3 | 3 | 10 | 67 |    |
| OTU180 | 4  | 2 | 0 | 2  | 0  | 0 | 2 | 0 | 2  | 6  | 2 | 8  | 0 | 1  | 1 | 3 | 2  | 4 | 1  | 2  | 1  | 0  | 2  | 0 | 3  | 5 | 2  | 0 | 2 | 9  | 66 |    |
| OTU181 | 4  | 1 | 5 | 3  | 5  | 0 | 0 | 0 | 0  | 0  | 0 | 3  | 1 | 6  | 0 | 7 | 0  | 5 | 6  | 9  | 5  | 1  | 0  | 0 | 0  | 1 | 0  | 2 | 2 | 0  | 66 |    |
| OTU182 | 1  | 6 | 0 | 4  | 2  | 0 | 0 | 1 | 0  | 3  | 0 | 0  | 2 | 5  | 2 | 7 | 4  | 2 | 3  | 4  | 0  | 5  | 0  | 0 | 5  | 1 | 2  | 0 | 3 | 3  | 65 |    |
| OTU183 | 3  | 3 | 1 | 3  | 3  | 3 | 1 | 1 | 9  | 2  | 5 | 0  | 6 | 1  | 3 | 0 | 3  | 4 | 4  | 0  | 3  | 2  | 0  | 0 | 0  | 1 | 0  | 0 | 2 | 2  | 65 |    |
| OTU184 | 6  | 1 | 1 | 2  | 2  | 1 | 0 | 0 | 2  | 2  | 0 | 0  | 0 | 6  | 6 | 1 | 0  | 2 | 1  | 3  | 4  | 3  | 6  | 6 | 3  | 0 | 4  | 1 | 1 | 1  | 65 |    |
| OTU185 | 2  | 0 | 1 | 3  | 1  | 2 | 3 | 2 | 2  | 0  | 1 | 5  | 2 | 1  | 6 | 4 | 0  | 3 | 2  | 4  | 2  | 3  | 2  | 0 | 3  | 2 | 3  | 2 | 3 | 1  | 65 |    |
| OTU186 | 5  | 4 | 2 | 7  | 5  | 2 | 2 | 1 | 0  | 0  | 0 | 0  | 5 | 0  | 1 | 1 | 5  | 4 | 7  | 0  | 1  | 1  | 5  | 0 | 0  | 1 | 0  | 1 | 2 | 2  | 64 |    |
| OTU187 | 0  | 0 | 0 | 0  | 0  | 4 | 0 | 1 | 3  | 7  | 0 | 12 | 0 | 1  | 0 | 7 | 4  | 0 | 0  | 1  | 1  | 3  | 0  | 2 | 10 | 2 | 1  | 2 | 3 | 0  | 64 |    |
| OTU188 | 4  | 0 | 3 | 3  | 0  | 0 | 1 | 1 | 0  | 2  | 0 | 0  | 2 | 8  | 0 | 0 | 7  | 0 | 5  | 5  | 15 | 0  | 0  | 0 | 0  | 0 | 7  | 0 | 0 | 0  | 63 |    |
| OTU189 | 1  | 0 | 1 | 2  | 1  | 0 | 6 | 1 | 0  | 2  | 0 | 0  | 0 | 0  | 1 | 0 | 0  | 1 | 1  | 2  | 0  | 1  | 1  | 2 | 16 | 4 | 12 | 5 | 2 | 1  | 63 |    |
| OTU190 | 0  | 4 | 0 | 4  | 0  | 9 | 0 | 0 | 2  | 10 | 2 | 0  | 0 | 10 | 1 | 7 | 3  | 0 | 3  | 0  | 3  | 0  | 0  | 0 | 2  | 0 | 2  | 0 | 0 | 0  | 62 |    |
| OTU191 | 4  | 1 | 0 | 11 | 0  | 0 | 0 | 4 | 0  | 0  | 0 | 3  | 2 | 0  | 6 | 0 | 1  | 3 | 10 | 0  | 1  | 0  | 4  | 3 | 0  | 0 | 0  | 1 | 5 | 3  | 62 |    |
| OTU192 | 4  | 2 | 1 | 3  | 1  | 2 | 1 | 0 | 3  | 1  | 0 | 0  | 2 | 2  | 1 | 4 | 10 | 0 | 5  | 2  | 4  | 3  | 1  | 1 | 1  | 1 | 1  | 2 | 3 | 1  | 62 |    |
| OTU193 | 13 | 0 | 7 | 0  | 11 | 3 | 0 | 1 | 0  | 0  | 2 | 1  | 1 | 0  | 0 | 0 | 17 | 1 | 0  | 0  | 0  | 1  | 0  | 0 | 0  | 0 | 0  | 0 | 0 | 4  | 62 |    |
| OTU194 | 6  | 0 | 2 | 2  | 1  | 4 | 1 | 0 | 2  | 0  | 0 | 5  | 2 | 1  | 5 | 1 | 0  | 0 | 1  | 9  | 0  | 0  | 0  | 1 | 2  | 3 | 3  | 2 | 3 | 6  | 62 |    |
| OTU195 | 1  | 3 | 3 | 2  | 2  | 7 | 2 | 0 | 0  | 0  | 0 | 2  | 0 | 1  | 0 | 2 | 1  | 4 | 3  | 0  | 4  | 1  | 1  | 3 | 4  | 0 | 0  | 8 | 0 | 7  | 61 |    |
| OTU196 | 9  | 3 | 0 | 9  | 0  | 9 | 0 | 0 | 0  | 1  | 1 | 2  | 1 | 1  | 2 | 1 | 3  | 2 | 1  | 0  | 2  | 4  | 1  | 0 | 1  | 2 | 3  | 0 | 3 | 0  | 61 |    |
| OTU197 | 3  | 1 | 1 | 0  | 1  | 2 | 0 | 1 | 1  | 2  | 1 | 0  | 4 | 0  | 0 | 3 | 1  | 2 | 0  | 1  | 0  | 2  | 1  | 0 | 20 | 5 | 9  | 0 | 0 | 0  | 61 |    |

|        |    |   |   |   |   |   |   |    |   |   |    |    |    |    |    |   |   |   |    |    |   |   |   |   |    |    |    |    |   |    |    |
|--------|----|---|---|---|---|---|---|----|---|---|----|----|----|----|----|---|---|---|----|----|---|---|---|---|----|----|----|----|---|----|----|
| OTU198 | 12 | 0 | 0 | 1 | 3 | 2 | 0 | 2  | 3 | 0 | 1  | 3  | 2  | 4  | 3  | 1 | 4 | 0 | 0  | 1  | 4 | 1 | 1 | 2 | 2  | 2  | 4  | 2  | 0 | 1  | 61 |
| OTU199 | 2  | 2 | 1 | 1 | 5 | 7 | 0 | 3  | 7 | 2 | 3  | 0  | 0  | 0  | 2  | 0 | 2 | 2 | 6  | 1  | 2 | 0 | 0 | 2 | 7  | 0  | 0  | 1  | 1 | 2  | 61 |
| OTU200 | 1  | 0 | 0 | 0 | 1 | 7 | 0 | 13 | 0 | 6 | 1  | 6  | 10 | 4  | 0  | 0 | 2 | 0 | 2  | 3  | 1 | 0 | 0 | 0 | 0  | 0  | 0  | 0  | 1 | 2  | 60 |
| OTU201 | 3  | 1 | 0 | 1 | 1 | 2 | 4 | 2  | 3 | 2 | 2  | 1  | 7  | 3  | 3  | 3 | 0 | 6 | 1  | 0  | 6 | 0 | 2 | 0 | 2  | 2  | 3  | 0  | 0 | 0  | 60 |
| OTU202 | 3  | 0 | 0 | 0 | 8 | 0 | 0 | 4  | 4 | 2 | 0  | 0  | 4  | 0  | 0  | 1 | 2 | 1 | 0  | 0  | 2 | 0 | 0 | 0 | 7  | 1  | 8  | 13 | 0 | 0  | 60 |
| OTU203 | 0  | 0 | 0 | 5 | 1 | 0 | 1 | 6  | 0 | 5 | 3  | 5  | 5  | 1  | 0  | 4 | 0 | 3 | 0  | 0  | 4 | 0 | 0 | 0 | 0  | 2  | 1  | 6  | 2 | 6  | 60 |
| OTU204 | 2  | 0 | 0 | 0 | 0 | 4 | 1 | 0  | 0 | 2 | 2  | 4  | 4  | 2  | 1  | 7 | 0 | 0 | 3  | 7  | 7 | 2 | 3 | 1 | 3  | 0  | 0  | 4  | 0 | 1  | 60 |
| OTU205 | 1  | 6 | 0 | 1 | 1 | 1 | 1 | 4  | 3 | 2 | 0  | 0  | 5  | 3  | 2  | 5 | 4 | 4 | 1  | 0  | 3 | 0 | 2 | 0 | 3  | 3  | 1  | 0  | 2 | 1  | 59 |
| OTU206 | 4  | 2 | 1 | 1 | 0 | 4 | 2 | 5  | 2 | 1 | 1  | 1  | 1  | 4  | 0  | 1 | 3 | 5 | 0  | 0  | 4 | 1 | 4 | 0 | 2  | 1  | 2  | 1  | 5 | 1  | 59 |
| OTU207 | 0  | 2 | 0 | 2 | 0 | 1 | 7 | 5  | 7 | 1 | 0  | 0  | 1  | 0  | 0  | 0 | 2 | 0 | 3  | 0  | 0 | 0 | 1 | 0 | 2  | 0  | 5  | 0  | 0 | 20 | 59 |
| OTU208 | 1  | 0 | 0 | 0 | 0 | 0 | 0 | 2  | 1 | 2 | 0  | 3  | 9  | 6  | 0  | 2 | 1 | 3 | 0  | 3  | 4 | 2 | 2 | 6 | 1  | 1  | 0  | 2  | 2 | 4  | 57 |
| OTU209 | 1  | 0 | 1 | 0 | 1 | 0 | 1 | 1  | 1 | 0 | 1  | 2  | 1  | 1  | 4  | 1 | 2 | 0 | 1  | 2  | 1 | 1 | 0 | 0 | 11 | 17 | 3  | 0  | 2 | 1  | 57 |
| OTU210 | 0  | 6 | 0 | 5 | 0 | 0 | 0 | 6  | 0 | 2 | 0  | 0  | 3  | 0  | 13 | 0 | 6 | 0 | 0  | 3  | 0 | 0 | 1 | 2 | 2  | 0  | 0  | 3  | 4 | 0  | 56 |
| OTU211 | 8  | 0 | 1 | 0 | 0 | 3 | 0 | 0  | 4 | 0 | 0  | 0  | 2  | 2  | 0  | 0 | 6 | 0 | 0  | 1  | 5 | 0 | 2 | 0 | 2  | 0  | 12 | 5  | 0 | 2  | 55 |
| OTU212 | 0  | 3 | 0 | 2 | 0 | 0 | 1 | 8  | 5 | 7 | 0  | 2  | 1  | 3  | 0  | 3 | 0 | 1 | 2  | 5  | 0 | 0 | 0 | 0 | 2  | 3  | 3  | 1  | 0 | 3  | 55 |
| OTU213 | 0  | 1 | 0 | 0 | 0 | 0 | 0 | 1  | 1 | 1 | 0  | 8  | 1  | 0  | 6  | 0 | 2 | 0 | 0  | 0  | 2 | 3 | 3 | 0 | 4  | 10 | 8  | 0  | 0 | 4  | 55 |
| OTU214 | 6  | 6 | 2 | 1 | 0 | 1 | 0 | 2  | 1 | 3 | 11 | 1  | 0  | 0  | 1  | 2 | 0 | 0 | 1  | 1  | 2 | 2 | 0 | 0 | 3  | 1  | 1  | 0  | 3 | 4  | 55 |
| OTU215 | 4  | 2 | 1 | 3 | 3 | 1 | 1 | 4  | 3 | 1 | 3  | 1  | 1  | 3  | 1  | 3 | 0 | 2 | 1  | 2  | 3 | 1 | 0 | 0 | 3  | 1  | 2  | 2  | 2 | 0  | 54 |
| OTU216 | 0  | 4 | 2 | 0 | 0 | 0 | 0 | 0  | 3 | 5 | 1  | 0  | 1  | 10 | 3  | 5 | 0 | 0 | 1  | 0  | 7 | 0 | 0 | 0 | 1  | 0  | 1  | 4  | 6 | 0  | 54 |
| OTU217 | 1  | 2 | 0 | 2 | 4 | 3 | 1 | 0  | 1 | 5 | 0  | 3  | 2  | 2  | 0  | 0 | 5 | 0 | 2  | 2  | 3 | 1 | 2 | 0 | 1  | 2  | 1  | 1  | 2 | 6  | 54 |
| OTU218 | 1  | 4 | 1 | 1 | 2 | 1 | 0 | 2  | 3 | 0 | 1  | 2  | 3  | 3  | 4  | 2 | 4 | 0 | 3  | 2  | 3 | 1 | 2 | 0 | 3  | 0  | 1  | 2  | 1 | 1  | 53 |
| OTU219 | 0  | 1 | 0 | 0 | 3 | 2 | 3 | 0  | 1 | 3 | 0  | 2  | 2  | 0  | 1  | 2 | 1 | 2 | 0  | 8  | 1 | 3 | 4 | 0 | 1  | 0  | 11 | 1  | 0 | 1  | 53 |
| OTU220 | 1  | 0 | 6 | 4 | 3 | 1 | 1 | 2  | 0 | 0 | 2  | 2  | 1  | 2  | 3  | 0 | 0 | 0 | 5  | 4  | 3 | 1 | 2 | 0 | 1  | 1  | 2  | 2  | 1 | 3  | 53 |
| OTU221 | 8  | 6 | 0 | 0 | 1 | 2 | 0 | 0  | 0 | 0 | 0  | 15 | 1  | 0  | 0  | 5 | 5 | 0 | 0  | 0  | 0 | 1 | 0 | 0 | 4  | 0  | 0  | 2  | 0 | 2  | 52 |
| OTU222 | 0  | 0 | 0 | 0 | 6 | 0 | 2 | 0  | 2 | 6 | 2  | 3  | 0  | 5  | 6  | 0 | 3 | 0 | 0  | 0  | 0 | 5 | 1 | 0 | 0  | 3  | 3  | 4  | 1 | 0  | 52 |
| OTU223 | 0  | 1 | 0 | 0 | 0 | 0 | 0 | 1  | 1 | 1 | 0  | 0  | 0  | 0  | 0  | 3 | 2 | 0 | 10 | 11 | 4 | 5 | 1 | 5 | 2  | 0  | 1  | 2  | 1 | 1  | 52 |

|        |    |    |    |   |   |   |   |   |   |   |    |   |   |   |    |   |   |   |   |   |   |   |   |   |   |    |   |    |   |    |    |    |
|--------|----|----|----|---|---|---|---|---|---|---|----|---|---|---|----|---|---|---|---|---|---|---|---|---|---|----|---|----|---|----|----|----|
| OTU224 | 9  | 2  | 10 | 4 | 0 | 2 | 0 | 1 | 1 | 1 | 0  | 0 | 0 | 0 | 0  | 0 | 0 | 0 | 0 | 0 | 0 | 0 | 0 | 0 | 0 | 4  | 3 | 11 | 2 | 0  | 51 |    |
| OTU225 | 0  | 1  | 0  | 0 | 0 | 5 | 2 | 2 | 5 | 1 | 3  | 4 | 4 | 3 | 3  | 1 | 3 | 0 | 7 | 1 | 4 | 1 | 0 | 0 | 0 | 0  | 1 | 0  | 0 | 0  | 51 |    |
| OTU226 | 7  | 1  | 0  | 1 | 4 | 2 | 0 | 4 | 0 | 0 | 0  | 4 | 0 | 0 | 0  | 2 | 0 | 0 | 8 | 0 | 0 | 0 | 0 | 2 | 2 | 12 | 2 | 0  | 0 | 51 |    |    |
| OTU227 | 13 | 0  | 1  | 2 | 2 | 0 | 2 | 0 | 1 | 1 | 1  | 3 | 1 | 1 | 2  | 0 | 3 | 1 | 3 | 1 | 2 | 2 | 1 | 0 | 0 | 2  | 2 | 1  | 0 | 3  | 51 |    |
| OTU228 | 0  | 2  | 0  | 0 | 1 | 4 | 0 | 6 | 0 | 1 | 13 | 0 | 0 | 6 | 0  | 3 | 0 | 1 | 1 | 2 | 0 | 0 | 4 | 0 | 1 | 0  | 0 | 0  | 0 | 5  | 50 |    |
| OTU229 | 2  | 3  | 2  | 1 | 4 | 0 | 3 | 2 | 0 | 0 | 0  | 1 | 3 | 1 | 2  | 1 | 3 | 0 | 1 | 1 | 0 | 0 | 2 | 1 | 1 | 0  | 2 | 4  | 3 | 7  | 50 |    |
| OTU230 | 1  | 0  | 3  | 3 | 1 | 0 | 1 | 2 | 0 | 1 | 0  | 1 | 1 | 3 | 0  | 2 | 3 | 1 | 2 | 5 | 6 | 2 | 4 | 0 | 1 | 2  | 1 | 1  | 0 | 2  | 49 |    |
| OTU231 | 0  | 0  | 0  | 4 | 5 | 0 | 5 | 3 | 2 | 0 | 0  | 0 | 0 | 0 | 4  | 6 | 1 | 1 | 0 | 6 | 5 | 3 | 0 | 0 | 2 | 0  | 0 | 2  | 0 | 0  | 49 |    |
| OTU232 | 0  | 1  | 0  | 3 | 1 | 1 | 0 | 0 | 4 | 4 | 0  | 1 | 3 | 3 | 1  | 0 | 3 | 1 | 1 | 3 | 1 | 5 | 0 | 3 | 0 | 1  | 0 | 5  | 0 | 3  | 48 |    |
| OTU233 | 2  | 2  | 1  | 0 | 1 | 1 | 0 | 2 | 1 | 1 | 0  | 2 | 3 | 4 | 0  | 1 | 0 | 1 | 3 | 4 | 6 | 5 | 0 | 0 | 1 | 1  | 0 | 3  | 2 | 1  | 48 |    |
| OTU234 | 1  | 0  | 1  | 1 | 1 | 3 | 3 | 0 | 3 | 3 | 1  | 0 | 1 | 0 | 2  | 4 | 3 | 0 | 1 | 1 | 0 | 0 | 0 | 0 | 0 | 2  | 4 | 6  | 3 | 4  | 48 |    |
| OTU235 | 2  | 1  | 5  | 0 | 0 | 0 | 0 | 1 | 3 | 0 | 1  | 9 | 2 | 2 | 0  | 3 | 3 | 0 | 0 | 1 | 1 | 2 | 1 | 5 | 0 | 0  | 1 | 2  | 0 | 3  | 48 |    |
| OTU236 | 1  | 2  | 1  | 1 | 0 | 1 | 1 | 0 | 2 | 0 | 0  | 1 | 0 | 0 | 1  | 3 | 3 | 0 | 2 | 1 | 3 | 2 | 1 | 0 | 3 | 1  | 2 | 9  | 2 | 4  | 47 |    |
| OTU237 | 2  | 1  | 2  | 1 | 3 | 1 | 1 | 5 | 2 | 2 | 0  | 4 | 1 | 0 | 1  | 3 | 1 | 0 | 1 | 6 | 1 | 1 | 2 | 0 | 1 | 0  | 1 | 1  | 3 | 0  | 47 |    |
| OTU238 | 21 | 0  | 0  | 0 | 0 | 4 | 0 | 0 | 0 | 0 | 0  | 0 | 0 | 0 | 7  | 0 | 4 | 0 | 0 | 0 | 0 | 0 | 0 | 0 | 0 | 6  | 1 | 0  | 0 | 0  | 47 |    |
| OTU239 | 0  | 0  | 0  | 0 | 0 | 0 | 0 | 1 | 3 | 0 | 0  | 0 | 0 | 0 | 10 | 0 | 0 | 7 | 1 | 0 | 0 | 0 | 0 | 6 | 0 | 0  | 5 | 9  | 0 | 5  | 0  | 47 |
| OTU240 | 0  | 0  | 0  | 1 | 0 | 0 | 0 | 0 | 1 | 1 | 0  | 1 | 0 | 0 | 0  | 0 | 0 | 1 | 0 | 0 | 0 | 0 | 0 | 1 | 0 | 21 | 9 | 7  | 0 | 2  | 1  | 46 |
| OTU241 | 5  | 1  | 0  | 2 | 0 | 2 | 3 | 2 | 1 | 1 | 4  | 0 | 0 | 0 | 1  | 3 | 1 | 0 | 2 | 2 | 1 | 0 | 2 | 0 | 3 | 0  | 1 | 4  | 4 | 1  | 46 |    |
| OTU242 | 7  | 0  | 1  | 2 | 1 | 2 | 1 | 4 | 1 | 2 | 1  | 0 | 2 | 0 | 0  | 0 | 3 | 0 | 0 | 0 | 0 | 0 | 0 | 0 | 0 | 6  | 2 | 3  | 2 | 6  | 0  | 46 |
| OTU243 | 2  | 0  | 1  | 5 | 0 | 1 | 4 | 0 | 3 | 1 | 2  | 0 | 0 | 4 | 2  | 0 | 1 | 1 | 1 | 0 | 4 | 0 | 0 | 0 | 4 | 2  | 2 | 2  | 0 | 3  | 45 |    |
| OTU244 | 3  | 0  | 0  | 1 | 0 | 1 | 0 | 2 | 2 | 0 | 0  | 1 | 8 | 3 | 3  | 1 | 0 | 2 | 0 | 3 | 2 | 0 | 3 | 1 | 1 | 0  | 1 | 4  | 1 | 2  | 45 |    |
| OTU245 | 0  | 13 | 1  | 2 | 2 | 4 | 0 | 0 | 0 | 0 | 0  | 0 | 0 | 8 | 0  | 0 | 0 | 0 | 0 | 3 | 0 | 0 | 2 | 2 | 7 | 0  | 0 | 0  | 0 | 0  | 44 |    |
| OTU246 | 2  | 4  | 1  | 2 | 1 | 0 | 1 | 0 | 0 | 2 | 1  | 2 | 0 | 0 | 3  | 0 | 3 | 1 | 5 | 4 | 2 | 2 | 1 | 0 | 2 | 0  | 2 | 2  | 1 | 0  | 44 |    |
| OTU247 | 1  | 1  | 1  | 0 | 0 | 0 | 2 | 0 | 3 | 0 | 0  | 2 | 1 | 4 | 2  | 6 | 1 | 0 | 5 | 0 | 1 | 2 | 2 | 0 | 2 | 1  | 3 | 2  | 1 | 1  | 44 |    |
| OTU248 | 0  | 0  | 3  | 5 | 4 | 0 | 6 | 5 | 0 | 0 | 1  | 2 | 3 | 3 | 0  | 0 | 0 | 1 | 0 | 0 | 0 | 0 | 0 | 0 | 0 | 5  | 0 | 3  | 2 | 1  | 44 |    |
| OTU249 | 0  | 0  | 0  | 1 | 0 | 2 | 0 | 1 | 8 | 8 | 1  | 0 | 0 | 2 | 3  | 0 | 0 | 0 | 3 | 4 | 0 | 1 | 0 | 1 | 3 | 0  | 2 | 0  | 4 | 0  | 44 |    |

|        |    |   |   |   |   |    |    |    |   |    |   |   |   |   |   |   |   |   |   |    |   |    |   |   |   |   |   |   |   |    |    |
|--------|----|---|---|---|---|----|----|----|---|----|---|---|---|---|---|---|---|---|---|----|---|----|---|---|---|---|---|---|---|----|----|
| OTU250 | 0  | 0 | 1 | 0 | 1 | 0  | 0  | 0  | 0 | 1  | 0 | 0 | 2 | 0 | 1 | 5 | 3 | 3 | 8 | 5  | 3 | 0  | 0 | 0 | 1 | 6 | 0 | 2 | 1 | 1  | 44 |
| OTU251 | 0  | 7 | 0 | 0 | 0 | 0  | 7  | 10 | 0 | 0  | 0 | 0 | 0 | 6 | 0 | 2 | 0 | 0 | 5 | 2  | 0 | 2  | 0 | 0 | 0 | 3 | 0 | 0 | 0 | 44 |    |
| OTU252 | 0  | 0 | 2 | 0 | 0 | 11 | 0  | 0  | 3 | 11 | 0 | 0 | 0 | 0 | 0 | 1 | 0 | 0 | 0 | 2  | 4 | 0  | 2 | 0 | 0 | 1 | 0 | 6 | 0 | 43 |    |
| OTU253 | 2  | 0 | 0 | 2 | 0 | 0  | 0  | 0  | 3 | 0  | 1 | 5 | 0 | 1 | 6 | 5 | 0 | 0 | 1 | 10 | 1 | 0  | 2 | 0 | 1 | 0 | 0 | 1 | 2 | 43 |    |
| OTU254 | 1  | 0 | 0 | 1 | 2 | 2  | 3  | 1  | 0 | 0  | 0 | 2 | 0 | 2 | 2 | 1 | 6 | 2 | 0 | 1  | 0 | 1  | 0 | 0 | 1 | 0 | 3 | 7 | 5 | 43 |    |
| OTU255 | 1  | 3 | 2 | 9 | 0 | 3  | 0  | 2  | 0 | 0  | 0 | 0 | 0 | 4 | 0 | 3 | 0 | 0 | 5 | 4  | 1 | 2  | 1 | 0 | 1 | 0 | 1 | 1 | 0 | 43 |    |
| OTU256 | 8  | 0 | 0 | 2 | 1 | 1  | 2  | 0  | 3 | 1  | 0 | 1 | 1 | 1 | 2 | 1 | 2 | 0 | 0 | 0  | 5 | 0  | 0 | 1 | 0 | 0 | 0 | 6 | 1 | 4  | 43 |
| OTU257 | 0  | 0 | 2 | 4 | 1 | 5  | 0  | 1  | 1 | 0  | 0 | 1 | 2 | 2 | 3 | 4 | 4 | 0 | 0 | 1  | 2 | 0  | 0 | 1 | 0 | 0 | 1 | 1 | 0 | 7  | 43 |
| OTU258 | 2  | 0 | 1 | 1 | 1 | 3  | 0  | 5  | 0 | 1  | 0 | 0 | 4 | 6 | 2 | 0 | 0 | 2 | 4 | 0  | 3 | 2  | 1 | 0 | 0 | 0 | 3 | 0 | 1 | 0  | 42 |
| OTU259 | 0  | 1 | 3 | 1 | 1 | 0  | 1  | 1  | 3 | 1  | 0 | 2 | 2 | 2 | 2 | 1 | 2 | 4 | 2 | 4  | 0 | 0  | 0 | 0 | 0 | 2 | 2 | 3 | 1 | 1  | 42 |
| OTU260 | 5  | 0 | 0 | 0 | 1 | 0  | 4  | 3  | 1 | 10 | 1 | 1 | 1 | 0 | 3 | 0 | 2 | 0 | 1 | 2  | 0 | 1  | 1 | 1 | 0 | 0 | 1 | 2 | 0 | 1  | 42 |
| OTU261 | 1  | 2 | 0 | 2 | 0 | 1  | 1  | 2  | 3 | 3  | 0 | 1 | 1 | 0 | 2 | 0 | 2 | 0 | 2 | 4  | 2 | 1  | 3 | 1 | 2 | 3 | 1 | 1 | 0 | 1  | 42 |
| OTU262 | 3  | 0 | 0 | 2 | 2 | 1  | 3  | 5  | 0 | 1  | 0 | 1 | 2 | 3 | 1 | 0 | 0 | 1 | 1 | 2  | 4 | 1  | 2 | 0 | 0 | 1 | 0 | 1 | 0 | 5  | 42 |
| OTU263 | 1  | 0 | 1 | 1 | 0 | 0  | 0  | 4  | 1 | 0  | 0 | 5 | 1 | 2 | 3 | 0 | 0 | 0 | 0 | 0  | 1 | 0  | 0 | 0 | 0 | 2 | 5 | 2 | 8 | 4  | 41 |
| OTU264 | 5  | 1 | 2 | 1 | 4 | 8  | 3  | 3  | 2 | 0  | 0 | 0 | 4 | 1 | 1 | 1 | 0 | 0 | 1 | 2  | 1 | 0  | 0 | 0 | 0 | 1 | 0 | 0 | 0 | 0  | 41 |
| OTU265 | 2  | 0 | 0 | 0 | 0 | 0  | 0  | 1  | 3 | 1  | 2 | 1 | 1 | 4 | 1 | 1 | 4 | 1 | 1 | 1  | 3 | 3  | 0 | 1 | 3 | 1 | 1 | 3 | 1 | 0  | 40 |
| OTU266 | 5  | 0 | 1 | 0 | 0 | 0  | 2  | 3  | 0 | 2  | 0 | 2 | 2 | 0 | 0 | 1 | 0 | 1 | 6 | 2  | 7 | 0  | 1 | 0 | 0 | 0 | 0 | 4 | 0 | 1  | 40 |
| OTU267 | 7  | 0 | 0 | 8 | 6 | 0  | 1  | 0  | 0 | 0  | 0 | 0 | 0 | 2 | 0 | 0 | 2 | 0 | 0 | 1  | 0 | 4  | 0 | 0 | 0 | 0 | 5 | 0 | 1 | 2  | 39 |
| OTU268 | 11 | 0 | 1 | 5 | 0 | 3  | 2  | 3  | 0 | 0  | 0 | 0 | 0 | 0 | 0 | 0 | 0 | 0 | 0 | 1  | 0 | 0  | 0 | 0 | 6 | 1 | 2 | 3 | 0 | 1  | 39 |
| OTU269 | 4  | 0 | 0 | 0 | 0 | 3  | 7  | 0  | 0 | 0  | 0 | 2 | 0 | 6 | 0 | 4 | 0 | 5 | 0 | 3  | 0 | 0  | 3 | 0 | 0 | 1 | 0 | 1 | 0 | 0  | 39 |
| OTU270 | 4  | 0 | 2 | 0 | 1 | 1  | 5  | 1  | 3 | 1  | 3 | 2 | 2 | 0 | 2 | 1 | 0 | 1 | 1 | 1  | 0 | 3  | 0 | 0 | 1 | 0 | 3 | 0 | 0 | 1  | 39 |
| OTU271 | 1  | 2 | 4 | 1 | 1 | 0  | 12 | 0  | 0 | 0  | 0 | 0 | 0 | 0 | 0 | 0 | 0 | 0 | 0 | 0  | 2 | 0  | 0 | 0 | 0 | 4 | 2 | 3 | 3 | 4  | 39 |
| OTU272 | 1  | 0 | 0 | 0 | 4 | 0  | 0  | 0  | 4 | 0  | 0 | 1 | 2 | 3 | 0 | 0 | 0 | 0 | 4 | 1  | 0 | 10 | 1 | 0 | 7 | 0 | 0 | 0 | 0 | 0  | 38 |
| OTU273 | 0  | 0 | 0 | 0 | 0 | 0  | 0  | 0  | 0 | 0  | 0 | 0 | 0 | 3 | 0 | 9 | 7 | 0 | 5 | 0  | 0 | 0  | 1 | 0 | 4 | 0 | 3 | 0 | 0 | 6  | 38 |
| OTU274 | 4  | 0 | 2 | 1 | 0 | 4  | 0  | 3  | 0 | 2  | 0 | 2 | 1 | 0 | 0 | 0 | 0 | 0 | 0 | 0  | 0 | 0  | 0 | 0 | 8 | 3 | 3 | 0 | 0 | 4  | 37 |
| OTU275 | 2  | 3 | 5 | 0 | 0 | 0  | 2  | 0  | 2 | 1  | 1 | 0 | 1 | 2 | 2 | 1 | 1 | 1 | 4 | 2  | 1 | 2  | 0 | 0 | 0 | 0 | 1 | 1 | 0 | 2  | 37 |

|        |    |   |   |   |   |    |   |   |   |   |   |   |   |    |   |   |    |   |   |   |   |   |   |   |    |    |   |   |    |    |    |
|--------|----|---|---|---|---|----|---|---|---|---|---|---|---|----|---|---|----|---|---|---|---|---|---|---|----|----|---|---|----|----|----|
| OTU276 | 3  | 3 | 0 | 0 | 7 | 0  | 0 | 4 | 1 | 0 | 0 | 0 | 0 | 4  | 0 | 6 | 1  | 0 | 5 | 0 | 1 | 0 | 0 | 0 | 0  | 0  | 1 | 0 | 1  | 37 |    |
| OTU277 | 0  | 0 | 0 | 0 | 0 | 0  | 0 | 0 | 0 | 0 | 0 | 0 | 0 | 0  | 0 | 0 | 0  | 0 | 1 | 0 | 0 | 9 | 0 | 0 | 9  | 11 | 7 | 0 | 0  | 0  | 37 |
| OTU278 | 1  | 0 | 0 | 2 | 2 | 3  | 2 | 3 | 2 | 0 | 0 | 6 | 0 | 0  | 1 | 1 | 2  | 0 | 1 | 0 | 4 | 2 | 0 | 2 | 1  | 0  | 0 | 1 | 1  | 0  | 37 |
| OTU279 | 0  | 0 | 0 | 2 | 0 | 0  | 0 | 0 | 0 | 3 | 0 | 7 | 0 | 0  | 0 | 0 | 2  | 0 | 0 | 8 | 6 | 0 | 1 | 0 | 0  | 0  | 0 | 4 | 3  | 1  | 37 |
| OTU280 | 0  | 0 | 0 | 1 | 1 | 1  | 0 | 0 | 0 | 5 | 8 | 7 | 0 | 0  | 0 | 0 | 0  | 0 | 0 | 0 | 0 | 0 | 0 | 2 | 0  | 0  | 5 | 2 | 5  | 37 |    |
| OTU281 | 0  | 0 | 1 | 1 | 0 | 2  | 0 | 0 | 0 | 4 | 0 | 2 | 1 | 1  | 0 | 0 | 0  | 0 | 3 | 0 | 0 | 3 | 1 | 1 | 2  | 8  | 1 | 0 | 2  | 4  | 37 |
| OTU282 | 12 | 6 | 0 | 2 | 2 | 0  | 0 | 0 | 0 | 0 | 0 | 1 | 0 | 4  | 0 | 0 | 0  | 0 | 0 | 0 | 0 | 5 | 0 | 0 | 0  | 0  | 2 | 0 | 1  | 1  | 36 |
| OTU283 | 2  | 0 | 2 | 1 | 1 | 1  | 0 | 3 | 2 | 1 | 1 | 1 | 0 | 0  | 0 | 0 | 0  | 1 | 0 | 0 | 0 | 0 | 0 | 0 | 2  | 3  | 1 | 3 | 11 | 36 |    |
| OTU284 | 2  | 1 | 0 | 2 | 1 | 1  | 1 | 1 | 1 | 1 | 2 | 1 | 1 | 1  | 2 | 1 | 2  | 2 | 0 | 3 | 0 | 2 | 1 | 2 | 0  | 3  | 2 | 0 | 0  | 0  | 36 |
| OTU285 | 2  | 0 | 0 | 1 | 2 | 7  | 1 | 0 | 1 | 0 | 0 | 3 | 0 | 0  | 0 | 1 | 0  | 1 | 4 | 1 | 0 | 1 | 4 | 0 | 0  | 0  | 1 | 1 | 3  | 2  | 36 |
| OTU286 | 8  | 0 | 0 | 0 | 3 | 0  | 0 | 0 | 0 | 0 | 0 | 0 | 0 | 0  | 0 | 0 | 0  | 0 | 1 | 6 | 0 | 3 | 0 | 1 | 13 | 0  | 0 | 1 | 0  | 36 |    |
| OTU287 | 0  | 0 | 0 | 0 | 3 | 0  | 0 | 2 | 0 | 0 | 0 | 2 | 0 | 1  | 1 | 4 | 10 | 0 | 0 | 2 | 1 | 0 | 0 | 0 | 1  | 6  | 0 | 2 | 0  | 0  | 35 |
| OTU288 | 12 | 0 | 0 | 1 | 1 | 0  | 0 | 0 | 0 | 1 | 0 | 4 | 0 | 2  | 0 | 0 | 0  | 0 | 1 | 0 | 0 | 1 | 2 | 0 | 4  | 0  | 4 | 1 | 1  | 35 |    |
| OTU289 | 0  | 0 | 0 | 0 | 1 | 10 | 0 | 2 | 3 | 0 | 3 | 3 | 0 | 0  | 0 | 0 | 0  | 1 | 0 | 0 | 0 | 0 | 0 | 1 | 2  | 0  | 0 | 0 | 1  | 7  | 34 |
| OTU290 | 1  | 0 | 0 | 2 | 0 | 3  | 0 | 0 | 2 | 0 | 0 | 2 | 0 | 4  | 2 | 2 | 0  | 0 | 1 | 2 | 1 | 0 | 2 | 3 | 3  | 0  | 0 | 2 | 0  | 2  | 34 |
| OTU291 | 2  | 1 | 0 | 1 | 1 | 2  | 0 | 0 | 3 | 1 | 0 | 0 | 0 | 4  | 0 | 1 | 1  | 0 | 3 | 4 | 1 | 0 | 0 | 0 | 1  | 2  | 3 | 0 | 1  | 2  | 34 |
| OTU292 | 14 | 0 | 0 | 0 | 1 | 0  | 0 | 0 | 0 | 0 | 0 | 0 | 0 | 2  | 0 | 2 | 0  | 6 | 1 | 0 | 0 | 2 | 1 | 0 | 0  | 0  | 3 | 1 | 1  | 0  | 34 |
| OTU293 | 0  | 1 | 0 | 2 | 0 | 0  | 0 | 1 | 2 | 1 | 0 | 0 | 4 | 1  | 1 | 2 | 0  | 0 | 3 | 0 | 1 | 0 | 0 | 0 | 7  | 5  | 2 | 0 | 1  | 0  | 34 |
| OTU294 | 0  | 0 | 0 | 0 | 0 | 3  | 0 | 0 | 1 | 3 | 0 | 9 | 0 | 0  | 1 | 3 | 0  | 2 | 0 | 0 | 0 | 0 | 2 | 0 | 2  | 0  | 0 | 1 | 2  | 5  | 34 |
| OTU295 | 0  | 0 | 0 | 0 | 0 | 0  | 0 | 0 | 1 | 0 | 1 | 4 | 2 | 11 | 0 | 0 | 0  | 3 | 2 | 0 | 0 | 3 | 1 | 3 | 1  | 0  | 0 | 2 | 0  | 0  | 34 |
| OTU296 | 0  | 0 | 0 | 5 | 5 | 0  | 0 | 0 | 0 | 0 | 0 | 0 | 2 | 0  | 0 | 6 | 5  | 1 | 2 | 0 | 0 | 0 | 0 | 0 | 4  | 0  | 1 | 0 | 3  | 0  | 34 |
| OTU297 | 5  | 0 | 0 | 0 | 0 | 0  | 1 | 2 | 0 | 2 | 0 | 0 | 1 | 1  | 0 | 0 | 1  | 0 | 1 | 0 | 2 | 1 | 0 | 2 | 1  | 1  | 0 | 0 | 9  | 4  | 34 |
| OTU298 | 0  | 0 | 2 | 0 | 1 | 2  | 0 | 3 | 1 | 1 | 0 | 2 | 1 | 2  | 8 | 0 | 1  | 1 | 2 | 0 | 1 | 0 | 0 | 0 | 2  | 2  | 0 | 0 | 1  | 0  | 33 |
| OTU299 | 2  | 4 | 0 | 0 | 1 | 0  | 1 | 0 | 1 | 2 | 0 | 1 | 2 | 0  | 3 | 4 | 1  | 2 | 0 | 2 | 2 | 1 | 1 | 0 | 0  | 0  | 1 | 0 | 0  | 2  | 33 |
| OTU300 | 2  | 3 | 2 | 0 | 0 | 1  | 0 | 0 | 0 | 2 | 0 | 0 | 1 | 5  | 0 | 2 | 2  | 0 | 1 | 1 | 3 | 2 | 0 | 0 | 1  | 0  | 1 | 1 | 2  | 1  | 33 |
| OTU301 | 3  | 3 | 1 | 0 | 0 | 0  | 0 | 0 | 0 | 1 | 0 | 0 | 6 | 0  | 1 | 2 | 0  | 2 | 0 | 1 | 0 | 2 | 0 | 0 | 0  | 0  | 0 | 1 | 10 | 0  | 33 |

|        |    |   |   |   |   |   |   |   |   |   |   |   |    |   |   |   |   |   |   |   |   |   |   |   |   |   |    |   |    |    |    |
|--------|----|---|---|---|---|---|---|---|---|---|---|---|----|---|---|---|---|---|---|---|---|---|---|---|---|---|----|---|----|----|----|
| OTU302 | 0  | 8 | 0 | 3 | 0 | 5 | 0 | 0 | 0 | 0 | 0 | 0 | 0  | 0 | 0 | 0 | 0 | 6 | 0 | 3 | 0 | 0 | 0 | 0 | 0 | 0 | 0  | 7 | 32 |    |    |
| OTU303 | 0  | 1 | 1 | 0 | 1 | 0 | 1 | 0 | 2 | 0 | 0 | 1 | 0  | 1 | 3 | 0 | 0 | 4 | 3 | 5 | 2 | 5 | 0 | 0 | 0 | 0 | 1  | 0 | 1  | 32 |    |
| OTU304 | 0  | 1 | 0 | 0 | 2 | 5 | 1 | 0 | 0 | 1 | 0 | 3 | 0  | 4 | 1 | 1 | 1 | 2 | 2 | 3 | 1 | 2 | 0 | 0 | 0 | 0 | 0  | 0 | 2  | 32 |    |
| OTU305 | 2  | 0 | 0 | 0 | 0 | 0 | 0 | 0 | 0 | 0 | 0 | 0 | 0  | 0 | 0 | 0 | 0 | 0 | 2 | 0 | 0 | 0 | 0 | 5 | 4 | 0 | 11 | 6 | 2  | 32 |    |
| OTU306 | 2  | 0 | 1 | 0 | 2 | 1 | 0 | 1 | 2 | 3 | 0 | 0 | 4  | 4 | 1 | 1 | 0 | 0 | 4 | 0 | 1 | 3 | 1 | 0 | 0 | 0 | 0  | 1 | 0  | 32 |    |
| OTU307 | 3  | 3 | 0 | 1 | 0 | 0 | 1 | 1 | 4 | 1 | 0 | 0 | 1  | 0 | 0 | 0 | 3 | 0 | 2 | 1 | 0 | 0 | 1 | 0 | 2 | 1 | 1  | 1 | 4  | 1  | 32 |
| OTU308 | 0  | 1 | 1 | 0 | 0 | 0 | 0 | 0 | 3 | 0 | 0 | 0 | 0  | 0 | 1 | 2 | 0 | 0 | 4 | 6 | 0 | 4 | 0 | 0 | 0 | 0 | 0  | 3 | 2  | 5  | 32 |
| OTU309 | 8  | 3 | 0 | 1 | 1 | 2 | 2 | 0 | 1 | 2 | 0 | 0 | 2  | 4 | 1 | 1 | 0 | 0 | 0 | 0 | 0 | 1 | 0 | 0 | 0 | 0 | 0  | 0 | 3  | 0  | 32 |
| OTU310 | 0  | 0 | 0 | 6 | 0 | 0 | 0 | 8 | 0 | 0 | 0 | 4 | 0  | 0 | 0 | 2 | 4 | 0 | 0 | 0 | 0 | 0 | 1 | 0 | 1 | 0 | 0  | 6 | 0  | 32 |    |
| OTU311 | 12 | 0 | 0 | 0 | 4 | 3 | 3 | 0 | 0 | 0 | 1 | 0 | 0  | 0 | 0 | 0 | 2 | 0 | 0 | 0 | 0 | 0 | 0 | 0 | 0 | 0 | 1  | 0 | 0  | 6  | 32 |
| OTU312 | 8  | 0 | 0 | 3 | 0 | 0 | 2 | 2 | 0 | 3 | 0 | 0 | 1  | 0 | 0 | 1 | 1 | 0 | 0 | 3 | 0 | 2 | 0 | 2 | 0 | 0 | 0  | 0 | 0  | 4  | 32 |
| OTU313 | 1  | 0 | 3 | 0 | 7 | 4 | 0 | 1 | 2 | 0 | 0 | 0 | 0  | 0 | 0 | 0 | 0 | 0 | 0 | 0 | 1 | 0 | 0 | 2 | 0 | 0 | 4  | 0 | 4  | 2  | 31 |
| OTU314 | 0  | 0 | 0 | 1 | 0 | 0 | 0 | 0 | 0 | 1 | 4 | 1 | 0  | 0 | 1 | 2 | 4 | 1 | 5 | 6 | 0 | 0 | 1 | 0 | 0 | 0 | 1  | 0 | 0  | 3  | 31 |
| OTU315 | 1  | 2 | 0 | 0 | 1 | 2 | 2 | 6 | 1 | 0 | 0 | 1 | 1  | 1 | 0 | 1 | 2 | 1 | 3 | 0 | 0 | 0 | 1 | 0 | 2 | 1 | 1  | 1 | 0  | 0  | 31 |
| OTU316 | 1  | 3 | 0 | 0 | 0 | 0 | 1 | 1 | 4 | 1 | 1 | 2 | 2  | 1 | 1 | 1 | 2 | 1 | 1 | 3 | 1 | 0 | 1 | 0 | 0 | 2 | 0  | 1 | 0  | 0  | 31 |
| OTU317 | 0  | 0 | 1 | 0 | 0 | 0 | 0 | 0 | 0 | 6 | 0 | 3 | 0  | 1 | 2 | 0 | 3 | 1 | 2 | 0 | 0 | 0 | 1 | 0 | 0 | 0 | 0  | 0 | 0  | 11 | 31 |
| OTU318 | 1  | 0 | 0 | 3 | 1 | 0 | 1 | 1 | 0 | 0 | 1 | 3 | 1  | 0 | 0 | 0 | 0 | 0 | 2 | 7 | 0 | 0 | 0 | 0 | 2 | 0 | 1  | 0 | 2  | 5  | 31 |
| OTU319 | 1  | 0 | 3 | 5 | 0 | 1 | 1 | 2 | 1 | 0 | 0 | 1 | 0  | 1 | 0 | 1 | 2 | 0 | 0 | 0 | 1 | 0 | 1 | 0 | 4 | 0 | 0  | 3 | 0  | 3  | 31 |
| OTU320 | 0  | 0 | 0 | 0 | 0 | 0 | 0 | 1 | 0 | 0 | 0 | 1 | 26 | 0 | 0 | 0 | 0 | 0 | 1 | 1 | 0 | 0 | 0 | 0 | 0 | 0 | 0  | 1 | 0  | 31 |    |
| OTU321 | 0  | 0 | 0 | 0 | 0 | 0 | 0 | 0 | 2 | 3 | 0 | 3 | 0  | 5 | 0 | 0 | 0 | 0 | 0 | 0 | 1 | 2 | 0 | 3 | 2 | 2 | 2  | 0 | 4  | 2  | 31 |
| OTU322 | 4  | 5 | 0 | 0 | 0 | 0 | 1 | 5 | 0 | 0 | 0 | 0 | 0  | 3 | 0 | 1 | 3 | 2 | 0 | 0 | 0 | 1 | 1 | 0 | 0 | 0 | 1  | 0 | 0  | 3  | 30 |
| OTU323 | 0  | 1 | 0 | 1 | 0 | 0 | 1 | 1 | 0 | 2 | 0 | 0 | 0  | 0 | 0 | 0 | 1 | 0 | 0 | 7 | 9 | 0 | 0 | 0 | 0 | 2 | 4  | 0 | 0  | 1  | 30 |
| OTU324 | 1  | 3 | 0 | 0 | 0 | 1 | 0 | 9 | 0 | 1 | 0 | 1 | 0  | 0 | 0 | 1 | 4 | 0 | 0 | 5 | 0 | 1 | 0 | 0 | 0 | 0 | 0  | 0 | 2  | 0  | 29 |
| OTU325 | 0  | 0 | 0 | 1 | 1 | 0 | 5 | 0 | 1 | 0 | 1 | 0 | 0  | 3 | 7 | 4 | 4 | 0 | 0 | 0 | 0 | 0 | 1 | 1 | 0 | 0 | 0  | 0 | 0  | 0  | 29 |
| OTU326 | 8  | 0 | 1 | 1 | 0 | 1 | 0 | 3 | 0 | 0 | 0 | 0 | 0  | 0 | 0 | 5 | 0 | 0 | 0 | 5 | 0 | 0 | 0 | 0 | 0 | 0 | 0  | 3 | 2  | 0  | 29 |
| OTU327 | 0  | 0 | 0 | 1 | 1 | 1 | 2 | 0 | 2 | 0 | 0 | 8 | 0  | 4 | 2 | 0 | 0 | 0 | 0 | 0 | 0 | 0 | 1 | 0 | 0 | 0 | 0  | 4 | 0  | 2  | 28 |



|        |   |   |   |   |   |   |   |   |    |   |   |   |   |   |   |   |   |   |    |   |   |   |   |   |    |   |   |   |   |    |    |
|--------|---|---|---|---|---|---|---|---|----|---|---|---|---|---|---|---|---|---|----|---|---|---|---|---|----|---|---|---|---|----|----|
| OTU328 | 0 | 0 | 2 | 0 | 0 | 0 | 0 | 0 | 1  | 0 | 0 | 0 | 0 | 1 | 0 | 0 | 0 | 0 | 1  | 0 | 0 | 0 | 0 | 9 | 0  | 0 | 5 | 2 | 7 | 28 |    |
| OTU329 | 0 | 1 | 0 | 0 | 0 | 0 | 0 | 1 | 0  | 1 | 0 | 2 | 4 | 1 | 1 | 4 | 1 | 2 | 2  | 2 | 3 | 0 | 0 | 1 | 0  | 1 | 0 | 0 | 1 | 0  | 28 |
| OTU330 | 0 | 1 | 1 | 0 | 1 | 0 | 0 | 1 | 1  | 0 | 0 | 4 | 0 | 3 | 4 | 1 | 0 | 0 | 1  | 3 | 1 | 0 | 0 | 0 | 0  | 1 | 2 | 1 | 0 | 2  | 28 |
| OTU331 | 0 | 0 | 0 | 0 | 3 | 4 | 0 | 0 | 3  | 1 | 0 | 1 | 0 | 0 | 1 | 1 | 0 | 0 | 1  | 0 | 1 | 0 | 1 | 0 | 1  | 6 | 2 | 0 | 2 | 0  | 28 |
| OTU332 | 0 | 0 | 0 | 4 | 0 | 0 | 0 | 0 | 0  | 0 | 0 | 0 | 2 | 1 | 0 | 4 | 0 | 5 | 8  | 0 | 0 | 0 | 2 | 0 | 0  | 0 | 0 | 2 | 0 | 0  | 28 |
| OTU333 | 0 | 0 | 3 | 2 | 2 | 1 | 1 | 0 | 0  | 0 | 4 | 2 | 0 | 0 | 1 | 0 | 0 | 3 | 0  | 0 | 0 | 3 | 1 | 0 | 1  | 0 | 0 | 0 | 2 | 2  | 28 |
| OTU334 | 1 | 2 | 0 | 0 | 1 | 0 | 1 | 0 | 1  | 6 | 0 | 0 | 3 | 0 | 3 | 0 | 0 | 0 | 1  | 1 | 0 | 2 | 1 | 1 | 2  | 0 | 1 | 1 | 0 | 0  | 28 |
| OTU335 | 0 | 0 | 0 | 1 | 3 | 0 | 0 | 1 | 2  | 5 | 0 | 1 | 1 | 1 | 0 | 0 | 0 | 0 | 0  | 0 | 0 | 0 | 0 | 0 | 11 | 0 | 0 | 0 | 0 | 1  | 27 |
| OTU336 | 0 | 0 | 1 | 3 | 0 | 2 | 3 | 1 | 0  | 2 | 0 | 0 | 0 | 3 | 5 | 1 | 0 | 3 | 0  | 0 | 0 | 1 | 0 | 0 | 1  | 0 | 0 | 0 | 0 | 1  | 27 |
| OTU337 | 0 | 1 | 3 | 1 | 0 | 1 | 0 | 2 | 0  | 0 | 0 | 1 | 2 | 2 | 3 | 0 | 4 | 0 | 2  | 0 | 1 | 0 | 1 | 0 | 1  | 0 | 1 | 0 | 0 | 1  | 27 |
| OTU338 | 0 | 0 | 0 | 1 | 2 | 0 | 0 | 0 | 0  | 0 | 0 | 0 | 2 | 3 | 0 | 0 | 0 | 0 | 2  | 0 | 0 | 0 | 0 | 3 | 0  | 0 | 7 | 1 | 6 | 0  | 27 |
| OTU339 | 1 | 0 | 0 | 3 | 2 | 1 | 1 | 2 | 3  | 0 | 0 | 3 | 0 | 1 | 0 | 1 | 1 | 0 | 0  | 1 | 0 | 2 | 0 | 0 | 1  | 1 | 2 | 1 | 0 | 0  | 27 |
| OTU340 | 2 | 0 | 0 | 2 | 0 | 2 | 0 | 2 | 2  | 6 | 0 | 0 | 0 | 1 | 0 | 3 | 0 | 1 | 0  | 0 | 1 | 0 | 0 | 2 | 0  | 0 | 0 | 0 | 2 | 1  | 27 |
| OTU341 | 0 | 0 | 1 | 1 | 2 | 1 | 0 | 1 | 1  | 0 | 0 | 0 | 4 | 0 | 1 | 1 | 3 | 1 | 2  | 3 | 0 | 0 | 0 | 0 | 0  | 0 | 0 | 1 | 2 | 1  | 26 |
| OTU342 | 0 | 0 | 0 | 0 | 0 | 0 | 0 | 0 | 0  | 0 | 0 | 0 | 0 | 0 | 0 | 7 | 0 | 0 | 14 | 0 | 0 | 0 | 0 | 1 | 0  | 0 | 3 | 0 | 0 | 1  | 26 |
| OTU343 | 0 | 0 | 0 | 0 | 0 | 0 | 0 | 0 | 17 | 3 | 0 | 0 | 0 | 0 | 0 | 0 | 0 | 0 | 0  | 0 | 0 | 0 | 0 | 2 | 0  | 0 | 3 | 0 | 0 | 1  | 26 |
| OTU344 | 2 | 3 | 2 | 0 | 0 | 0 | 2 | 1 | 4  | 0 | 0 | 1 | 0 | 0 | 0 | 0 | 0 | 0 | 0  | 0 | 0 | 0 | 1 | 1 | 2  | 1 | 1 | 5 | 0 | 0  | 26 |
| OTU345 | 1 | 3 | 0 | 0 | 0 | 0 | 2 | 1 | 2  | 0 | 0 | 1 | 0 | 0 | 0 | 0 | 0 | 1 | 2  | 0 | 1 | 1 | 0 | 0 | 0  | 2 | 1 | 2 | 1 | 5  | 26 |
| OTU346 | 3 | 0 | 0 | 0 | 1 | 0 | 2 | 0 | 0  | 0 | 0 | 0 | 2 | 2 | 0 | 1 | 0 | 0 | 5  | 0 | 0 | 0 | 4 | 0 | 3  | 0 | 2 | 1 | 0 | 0  | 26 |
| OTU347 | 1 | 0 | 1 | 6 | 0 | 0 | 0 | 0 | 2  | 2 | 0 | 0 | 0 | 0 | 0 | 8 | 0 | 0 | 3  | 0 | 0 | 0 | 0 | 1 | 0  | 0 | 0 | 2 | 0 | 0  | 26 |
| OTU348 | 0 | 0 | 0 | 2 | 0 | 1 | 0 | 1 | 1  | 1 | 0 | 1 | 1 | 3 | 0 | 2 | 0 | 1 | 1  | 2 | 0 | 2 | 3 | 0 | 0  | 2 | 0 | 0 | 1 | 1  | 26 |
| OTU349 | 0 | 0 | 0 | 0 | 0 | 0 | 0 | 9 | 2  | 0 | 0 | 0 | 1 | 0 | 0 | 0 | 0 | 1 | 5  | 0 | 1 | 0 | 0 | 0 | 4  | 0 | 1 | 2 | 0 | 0  | 26 |
| OTU350 | 4 | 0 | 0 | 0 | 0 | 0 | 2 | 0 | 0  | 0 | 0 | 0 | 1 | 0 | 0 | 2 | 0 | 0 | 2  | 0 | 0 | 1 | 4 | 0 | 1  | 4 | 0 | 2 | 1 | 1  | 25 |
| OTU351 | 5 | 1 | 0 | 1 | 0 | 1 | 0 | 1 | 0  | 0 | 0 | 6 | 1 | 1 | 0 | 0 | 1 | 0 | 0  | 0 | 0 | 0 | 2 | 0 | 1  | 1 | 0 | 1 | 0 | 2  | 25 |
| OTU352 | 0 | 1 | 0 | 0 | 0 | 2 | 1 | 0 | 1  | 0 | 0 | 1 | 1 | 0 | 2 | 0 | 1 | 0 | 5  | 2 | 0 | 0 | 2 | 0 | 1  | 0 | 1 | 1 | 1 | 2  | 25 |
| OTU353 | 0 | 1 | 1 | 2 | 0 | 1 | 0 | 2 | 0  | 2 | 0 | 0 | 1 | 1 | 0 | 1 | 1 | 2 | 0  | 3 | 2 | 0 | 2 | 0 | 0  | 0 | 1 | 0 | 0 | 2  | 25 |





|        |   |    |   |   |   |   |   |   |   |   |   |   |   |   |   |   |   |   |   |   |   |   |   |   |   |   |    |   |   |    |    |
|--------|---|----|---|---|---|---|---|---|---|---|---|---|---|---|---|---|---|---|---|---|---|---|---|---|---|---|----|---|---|----|----|
| OTU406 | 0 | 0  | 2 | 1 | 0 | 0 | 0 | 0 | 0 | 3 | 3 | 0 | 0 | 0 | 0 | 1 | 0 | 0 | 0 | 3 | 0 | 0 | 0 | 1 | 0 | 2 | 1  | 1 | 2 | 20 |    |
| OTU407 | 0 | 0  | 1 | 4 | 1 | 0 | 0 | 3 | 3 | 0 | 0 | 0 | 0 | 4 | 0 | 0 | 0 | 0 | 3 | 0 | 0 | 1 | 0 | 0 | 0 | 0 | 0  | 0 | 0 | 20 |    |
| OTU408 | 0 | 0  | 1 | 1 | 0 | 0 | 2 | 2 | 1 | 0 | 1 | 0 | 2 | 0 | 0 | 0 | 0 | 1 | 0 | 0 | 0 | 1 | 2 | 0 | 2 | 1 | 0  | 2 | 1 | 20 |    |
| OTU409 | 2 | 0  | 0 | 0 | 4 | 0 | 5 | 1 | 3 | 0 | 0 | 0 | 0 | 0 | 0 | 0 | 0 | 0 | 0 | 1 | 4 | 0 | 0 | 0 | 0 | 0 | 0  | 0 | 0 | 20 |    |
| OTU410 | 3 | 0  | 0 | 0 | 0 | 0 | 0 | 7 | 0 | 0 | 0 | 0 | 3 | 0 | 0 | 0 | 0 | 0 | 0 | 0 | 0 | 0 | 0 | 0 | 0 | 6 | 1  | 0 | 0 | 20 |    |
| OTU411 | 2 | 2  | 0 | 0 | 1 | 1 | 0 | 1 | 2 | 1 | 0 | 0 | 0 | 0 | 1 | 2 | 2 | 1 | 0 | 0 | 1 | 0 | 2 | 0 | 0 | 0 | 0  | 0 | 0 | 19 |    |
| OTU412 | 0 | 8  | 0 | 3 | 2 | 0 | 0 | 0 | 0 | 0 | 0 | 2 | 0 | 0 | 0 | 0 | 0 | 0 | 2 | 2 | 0 | 0 | 0 | 0 | 0 | 0 | 0  | 0 | 0 | 19 |    |
| OTU413 | 2 | 2  | 0 | 0 | 1 | 0 | 0 | 0 | 0 | 0 | 0 | 0 | 1 | 0 | 0 | 0 | 2 | 0 | 0 | 3 | 0 | 1 | 0 | 0 | 0 | 1 | 0  | 0 | 3 | 3  | 19 |
| OTU414 | 0 | 0  | 1 | 0 | 0 | 0 | 0 | 2 | 3 | 0 | 0 | 0 | 0 | 0 | 1 | 3 | 0 | 0 | 0 | 0 | 3 | 0 | 5 | 0 | 0 | 0 | 0  | 0 | 1 | 0  | 19 |
| OTU415 | 0 | 0  | 0 | 0 | 0 | 0 | 2 | 1 | 0 | 0 | 0 | 4 | 0 | 0 | 1 | 0 | 0 | 4 | 0 | 0 | 0 | 1 | 1 | 1 | 0 | 3 | 0  | 0 | 1 | 0  | 19 |
| OTU416 | 0 | 0  | 0 | 0 | 0 | 2 | 0 | 1 | 1 | 0 | 1 | 1 | 1 | 1 | 3 | 1 | 0 | 0 | 0 | 0 | 1 | 1 | 0 | 0 | 1 | 1 | 1  | 0 | 1 | 1  | 19 |
| OTU417 | 2 | 0  | 0 | 1 | 1 | 1 | 0 | 1 | 0 | 0 | 0 | 0 | 1 | 0 | 1 | 0 | 0 | 0 | 1 | 2 | 0 | 0 | 1 | 0 | 5 | 0 | 1  | 0 | 1 | 0  | 19 |
| OTU418 | 1 | 1  | 1 | 0 | 0 | 3 | 0 | 1 | 2 | 0 | 0 | 2 | 0 | 1 | 0 | 3 | 0 | 0 | 0 | 1 | 1 | 1 | 0 | 0 | 0 | 0 | 1  | 0 | 0 | 0  | 19 |
| OTU419 | 0 | 0  | 0 | 0 | 0 | 0 | 0 | 0 | 0 | 0 | 0 | 0 | 0 | 0 | 0 | 0 | 0 | 0 | 0 | 2 | 0 | 0 | 0 | 0 | 3 | 1 | 10 | 1 | 2 | 19 |    |
| OTU420 | 0 | 0  | 0 | 0 | 1 | 0 | 0 | 0 | 0 | 2 | 0 | 1 | 0 | 3 | 1 | 2 | 0 | 0 | 0 | 0 | 0 | 2 | 0 | 0 | 0 | 1 | 1  | 2 | 3 | 19 |    |
| OTU421 | 0 | 10 | 0 | 0 | 0 | 0 | 0 | 0 | 0 | 1 | 0 | 3 | 0 | 0 | 4 | 0 | 0 | 0 | 0 | 0 | 0 | 0 | 0 | 0 | 0 | 0 | 1  | 0 | 0 | 19 |    |
| OTU422 | 3 | 0  | 0 | 0 | 0 | 0 | 1 | 0 | 0 | 3 | 1 | 0 | 0 | 1 | 0 | 1 | 1 | 0 | 1 | 0 | 0 | 0 | 0 | 0 | 0 | 4 | 0  | 1 | 2 | 0  | 19 |
| OTU423 | 0 | 0  | 1 | 0 | 3 | 1 | 0 | 2 | 0 | 0 | 1 | 1 | 0 | 4 | 1 | 0 | 2 | 0 | 0 | 1 | 2 | 0 | 0 | 0 | 0 | 0 | 0  | 0 | 0 | 0  | 19 |
| OTU424 | 0 | 0  | 0 | 0 | 0 | 0 | 0 | 0 | 0 | 2 | 5 | 0 | 8 | 0 | 3 | 0 | 0 | 1 | 0 | 0 | 0 | 0 | 0 | 0 | 0 | 0 | 0  | 0 | 0 | 0  | 19 |
| OTU425 | 0 | 0  | 0 | 0 | 1 | 0 | 0 | 0 | 0 | 0 | 0 | 0 | 0 | 0 | 1 | 2 | 1 | 0 | 1 | 4 | 0 | 0 | 0 | 0 | 6 | 2 | 0  | 1 | 0 | 0  | 19 |
| OTU426 | 0 | 0  | 0 | 1 | 0 | 0 | 2 | 3 | 0 | 0 | 1 | 0 | 2 | 0 | 0 | 0 | 2 | 2 | 0 | 0 | 0 | 1 | 2 | 1 | 0 | 0 | 0  | 1 | 1 | 0  | 19 |
| OTU427 | 2 | 0  | 0 | 2 | 1 | 2 | 1 | 0 | 0 | 0 | 0 | 0 | 3 | 1 | 0 | 1 | 0 | 0 | 0 | 0 | 0 | 0 | 0 | 0 | 0 | 0 | 0  | 0 | 0 | 6  | 19 |
| OTU428 | 0 | 0  | 1 | 0 | 6 | 0 | 0 | 0 | 0 | 0 | 0 | 0 | 0 | 5 | 0 | 0 | 0 | 0 | 0 | 0 | 3 | 4 | 0 | 0 | 0 | 0 | 0  | 0 | 0 | 0  | 19 |
| OTU429 | 2 | 0  | 2 | 0 | 0 | 0 | 0 | 2 | 1 | 0 | 0 | 0 | 0 | 1 | 0 | 0 | 0 | 0 | 0 | 6 | 1 | 0 | 0 | 0 | 0 | 1 | 2  | 1 | 0 | 0  | 19 |
| OTU430 | 0 | 0  | 5 | 0 | 0 | 0 | 0 | 2 | 0 | 2 | 0 | 1 | 1 | 2 | 0 | 0 | 0 | 0 | 1 | 0 | 0 | 0 | 0 | 1 | 0 | 0 | 0  | 0 | 0 | 3  | 18 |
| OTU431 | 2 | 0  | 0 | 1 | 2 | 2 | 0 | 1 | 0 | 0 | 0 | 0 | 1 | 0 | 1 | 1 | 0 | 1 | 0 | 0 | 0 | 0 | 0 | 1 | 1 | 1 | 1  | 0 | 1 | 1  | 18 |

|        |   |   |   |   |   |   |   |   |   |   |   |   |   |   |    |   |   |   |   |   |   |   |    |   |   |   |   |   |   |   |    |    |
|--------|---|---|---|---|---|---|---|---|---|---|---|---|---|---|----|---|---|---|---|---|---|---|----|---|---|---|---|---|---|---|----|----|
| OTU432 | 0 | 0 | 0 | 0 | 0 | 1 | 1 | 0 | 0 | 0 | 1 | 0 | 0 | 0 | 0  | 4 | 0 | 0 | 0 | 1 | 1 | 2 | 0  | 1 | 4 | 0 | 0 | 1 | 0 | 1 | 18 |    |
| OTU433 | 0 | 0 | 0 | 0 | 0 | 0 | 0 | 0 | 0 | 0 | 0 | 6 | 0 | 0 | 0  | 2 | 0 | 0 | 9 | 0 | 0 | 0 | 0  | 0 | 0 | 0 | 0 | 1 | 0 | 0 | 18 |    |
| OTU434 | 0 | 0 | 0 | 0 | 0 | 0 | 0 | 0 | 0 | 6 | 0 | 0 | 0 | 0 | 0  | 0 | 0 | 0 | 0 | 0 | 0 | 0 | 0  | 0 | 5 | 0 | 0 | 7 | 0 | 0 | 18 |    |
| OTU435 | 0 | 0 | 0 | 0 | 0 | 0 | 0 | 3 | 0 | 0 | 0 | 0 | 0 | 0 | 0  | 3 | 0 | 0 | 0 | 0 | 1 | 0 | 1  | 0 | 0 | 0 | 5 | 0 | 1 | 4 | 18 |    |
| OTU436 | 0 | 0 | 0 | 0 | 2 | 1 | 2 | 1 | 0 | 0 | 0 | 2 | 0 | 1 | 1  | 1 | 0 | 0 | 1 | 1 | 1 | 0 | 0  | 0 | 0 | 2 | 0 | 1 | 0 | 1 | 18 |    |
| OTU437 | 0 | 0 | 1 | 3 | 0 | 0 | 1 | 0 | 0 | 0 | 0 | 1 | 0 | 1 | 1  | 1 | 2 | 0 | 0 | 1 | 1 | 0 | 0  | 0 | 1 | 1 | 0 | 0 | 1 | 2 | 18 |    |
| OTU438 | 5 | 0 | 0 | 1 | 0 | 0 | 1 | 0 | 0 | 0 | 1 | 0 | 0 | 0 | 0  | 0 | 0 | 0 | 0 | 0 | 4 | 3 | 1  | 0 | 0 | 0 | 1 | 0 | 0 | 1 | 18 |    |
| OTU439 | 0 | 0 | 0 | 2 | 0 | 0 | 0 | 4 | 0 | 0 | 0 | 0 | 0 | 0 | 0  | 4 | 0 | 0 | 5 | 0 | 0 | 0 | 0  | 0 | 1 | 0 | 1 | 1 | 0 | 0 | 18 |    |
| OTU440 | 2 | 1 | 0 | 0 | 1 | 0 | 0 | 2 | 0 | 1 | 0 | 1 | 1 | 0 | 0  | 1 | 0 | 1 | 1 | 0 | 0 | 0 | 0  | 0 | 0 | 2 | 2 | 2 | 0 | 0 | 18 |    |
| OTU441 | 0 | 0 | 0 | 0 | 0 | 0 | 0 | 0 | 0 | 4 | 0 | 0 | 0 | 0 | 0  | 0 | 1 | 0 | 1 | 0 | 0 | 0 | 0  | 0 | 1 | 3 | 2 | 5 | 1 | 0 | 18 |    |
| OTU442 | 0 | 0 | 0 | 0 | 0 | 0 | 0 | 6 | 0 | 0 | 0 | 0 | 0 | 0 | 11 | 0 | 0 | 0 | 0 | 0 | 0 | 0 | 0  | 0 | 0 | 0 | 0 | 0 | 0 | 0 | 17 |    |
| OTU443 | 0 | 1 | 0 | 0 | 0 | 0 | 1 | 0 | 0 | 0 | 1 | 1 | 3 | 2 | 1  | 0 | 0 | 0 | 1 | 0 | 1 | 0 | 1  | 0 | 1 | 1 | 0 | 0 | 1 | 1 | 17 |    |
| OTU444 | 0 | 0 | 0 | 1 | 0 | 1 | 3 | 3 | 0 | 0 | 0 | 0 | 0 | 1 | 0  | 1 | 0 | 0 | 2 | 0 | 0 | 0 | 0  | 0 | 0 | 1 | 2 | 0 | 0 | 2 | 17 |    |
| OTU445 | 0 | 0 | 0 | 0 | 0 | 1 | 0 | 0 | 0 | 0 | 0 | 1 | 0 | 0 | 0  | 0 | 0 | 0 | 0 | 0 | 0 | 0 | 10 | 0 | 0 | 0 | 0 | 5 | 0 | 0 | 17 |    |
| OTU446 | 0 | 0 | 0 | 2 | 3 | 0 | 0 | 0 | 0 | 5 | 0 | 0 | 0 | 0 | 0  | 2 | 0 | 0 | 0 | 2 | 0 | 1 | 0  | 0 | 0 | 0 | 2 | 0 | 0 | 0 | 17 |    |
| OTU447 | 0 | 0 | 0 | 1 | 0 | 2 | 0 | 0 | 0 | 0 | 0 | 0 | 0 | 0 | 0  | 0 | 0 | 0 | 0 | 0 | 3 | 0 | 4  | 0 | 0 | 0 | 0 | 5 | 2 | 0 | 17 |    |
| OTU448 | 1 | 0 | 1 | 0 | 2 | 3 | 0 | 0 | 1 | 0 | 0 | 0 | 1 | 0 | 0  | 1 | 0 | 0 | 1 | 1 | 0 | 1 | 0  | 1 | 2 | 0 | 1 | 0 | 0 | 0 | 17 |    |
| OTU449 | 1 | 0 | 1 | 0 | 1 | 7 | 0 | 1 | 0 | 0 | 0 | 0 | 0 | 1 | 0  | 0 | 0 | 0 | 1 | 0 | 0 | 0 | 0  | 0 | 0 | 0 | 0 | 2 | 0 | 2 | 17 |    |
| OTU450 | 2 | 0 | 0 | 6 | 0 | 0 | 0 | 0 | 1 | 1 | 0 | 0 | 0 | 0 | 0  | 0 | 0 | 0 | 0 | 0 | 0 | 1 | 0  | 0 | 0 | 0 | 3 | 1 | 0 | 2 | 17 |    |
| OTU451 | 1 | 0 | 0 | 0 | 0 | 0 | 0 | 0 | 2 | 2 | 1 | 1 | 0 | 1 | 1  | 0 | 0 | 0 | 2 | 1 | 0 | 1 | 1  | 1 | 0 | 1 | 0 | 0 | 1 | 0 | 17 |    |
| OTU452 | 3 | 0 | 0 | 0 | 0 | 0 | 0 | 0 | 0 | 0 | 0 | 0 | 3 | 1 | 0  | 0 | 1 | 0 | 1 | 1 | 0 | 0 | 0  | 0 | 4 | 0 | 0 | 0 | 1 | 2 | 17 |    |
| OTU453 | 0 | 0 | 0 | 0 | 2 | 0 | 0 | 0 | 1 | 0 | 0 | 3 | 0 | 0 | 0  | 0 | 1 | 0 | 0 | 0 | 0 | 1 | 0  | 0 | 1 | 0 | 1 | 4 | 0 | 3 | 17 |    |
| OTU454 | 0 | 0 | 1 | 0 | 2 | 0 | 0 | 0 | 1 | 0 | 0 | 0 | 0 | 0 | 0  | 2 | 0 | 0 | 0 | 0 | 0 | 0 | 0  | 1 | 8 | 0 | 0 | 2 | 0 | 0 | 17 |    |
| OTU455 | 1 | 0 | 0 | 0 | 2 | 0 | 0 | 1 | 2 | 0 | 0 | 1 | 1 | 1 | 1  | 0 | 0 | 0 | 1 | 1 | 2 | 0 | 1  | 0 | 0 | 0 | 0 | 0 | 1 | 0 | 16 |    |
| OTU456 | 2 | 0 | 0 | 1 | 0 | 0 | 0 | 0 | 1 | 1 | 0 | 1 | 1 | 0 | 0  | 0 | 0 | 0 | 0 | 0 | 0 | 0 | 0  | 0 | 0 | 0 | 2 | 0 | 0 | 2 | 5  | 16 |
| OTU457 | 1 | 0 | 0 | 0 | 0 | 2 | 1 | 0 | 1 | 0 | 0 | 0 | 0 | 0 | 0  | 0 | 1 | 0 | 1 | 0 | 2 | 4 | 1  | 0 | 0 | 1 | 1 | 0 | 0 | 0 | 16 |    |



|        |   |   |   |   |   |   |   |   |   |   |   |   |   |   |   |   |   |   |   |   |   |   |   |   |   |   |   |    |   |    |    |    |
|--------|---|---|---|---|---|---|---|---|---|---|---|---|---|---|---|---|---|---|---|---|---|---|---|---|---|---|---|----|---|----|----|----|
| OTU484 | 0 | 0 | 0 | 3 | 0 | 0 | 0 | 1 | 0 | 0 | 0 | 5 | 0 | 0 | 0 | 1 | 0 | 0 | 0 | 0 | 0 | 0 | 1 | 0 | 0 | 0 | 0 | 15 |   |    |    |    |
| OTU485 | 4 | 6 | 0 | 0 | 1 | 3 | 0 | 0 | 0 | 0 | 0 | 0 | 0 | 0 | 0 | 0 | 0 | 0 | 0 | 0 | 0 | 0 | 0 | 0 | 0 | 0 | 1 | 0  | 0 | 15 |    |    |
| OTU486 | 1 | 0 | 0 | 1 | 0 | 0 | 1 | 1 | 0 | 1 | 0 | 0 | 0 | 0 | 0 | 2 | 1 | 0 | 1 | 1 | 0 | 1 | 0 | 0 | 1 | 2 | 0 | 1  | 0 | 0  | 15 |    |
| OTU487 | 0 | 0 | 0 | 0 | 0 | 0 | 0 | 0 | 0 | 0 | 5 | 1 | 0 | 3 | 2 | 0 | 0 | 2 | 0 | 0 | 0 | 0 | 0 | 0 | 0 | 0 | 0 | 0  | 1 | 0  | 14 |    |
| OTU488 | 4 | 0 | 0 | 0 | 3 | 0 | 0 | 0 | 1 | 0 | 0 | 0 | 0 | 2 | 0 | 0 | 2 | 0 | 0 | 0 | 0 | 0 | 0 | 0 | 0 | 0 | 0 | 0  | 2 | 0  | 14 |    |
| OTU489 | 0 | 1 | 0 | 0 | 1 | 1 | 1 | 0 | 1 | 0 | 0 | 0 | 2 | 1 | 2 | 0 | 0 | 0 | 0 | 2 | 0 | 0 | 0 | 0 | 0 | 0 | 0 | 1  | 1 | 0  | 0  | 14 |
| OTU490 | 0 | 0 | 0 | 0 | 3 | 0 | 0 | 0 | 0 | 2 | 1 | 0 | 0 | 0 | 1 | 0 | 0 | 1 | 1 | 1 | 0 | 0 | 0 | 0 | 0 | 0 | 0 | 0  | 4 | 0  | 0  | 14 |
| OTU491 | 1 | 0 | 1 | 0 | 0 | 1 | 0 | 0 | 1 | 0 | 2 | 1 | 0 | 0 | 0 | 1 | 0 | 0 | 2 | 1 | 0 | 0 | 0 | 0 | 0 | 0 | 0 | 1  | 1 | 1  | 1  | 14 |
| OTU492 | 0 | 0 | 0 | 1 | 1 | 1 | 2 | 0 | 1 | 0 | 1 | 0 | 0 | 0 | 1 | 1 | 0 | 0 | 0 | 1 | 0 | 1 | 0 | 0 | 0 | 1 | 0 | 0  | 2 | 0  | 14 |    |
| OTU493 | 1 | 0 | 0 | 0 | 0 | 0 | 0 | 0 | 1 | 0 | 0 | 1 | 1 | 0 | 1 | 0 | 0 | 1 | 4 | 1 | 0 | 1 | 0 | 1 | 0 | 0 | 0 | 0  | 1 | 0  | 14 |    |
| OTU494 | 4 | 0 | 0 | 0 | 0 | 0 | 0 | 0 | 0 | 2 | 0 | 0 | 3 | 0 | 2 | 0 | 0 | 0 | 1 | 0 | 0 | 1 | 0 | 0 | 0 | 0 | 1 | 0  | 0 | 0  | 14 |    |
| OTU495 | 1 | 0 | 0 | 0 | 0 | 1 | 0 | 3 | 0 | 0 | 0 | 1 | 0 | 1 | 2 | 0 | 0 | 0 | 1 | 0 | 0 | 0 | 0 | 0 | 1 | 1 | 0 | 1  | 0 | 1  | 14 |    |
| OTU496 | 1 | 0 | 0 | 0 | 1 | 1 | 0 | 0 | 1 | 0 | 0 | 0 | 0 | 2 | 1 | 0 | 2 | 0 | 0 | 2 | 0 | 0 | 0 | 1 | 1 | 0 | 0 | 1  | 0 | 0  | 14 |    |
| OTU497 | 0 | 2 | 0 | 3 | 1 | 0 | 0 | 0 | 0 | 0 | 0 | 0 | 1 | 0 | 1 | 0 | 0 | 1 | 0 | 2 | 1 | 0 | 0 | 0 | 0 | 0 | 0 | 2  | 0 | 0  | 14 |    |
| OTU498 | 1 | 0 | 0 | 0 | 0 | 1 | 0 | 0 | 2 | 0 | 4 | 0 | 0 | 0 | 0 | 0 | 0 | 4 | 0 | 0 | 0 | 0 | 0 | 2 | 0 | 0 | 0 | 0  | 0 | 0  | 14 |    |
| OTU499 | 6 | 0 | 0 | 0 | 0 | 1 | 0 | 0 | 0 | 1 | 1 | 1 | 0 | 0 | 0 | 0 | 0 | 0 | 1 | 0 | 0 | 0 | 0 | 0 | 0 | 0 | 0 | 0  | 1 | 2  | 14 |    |
| OTU500 | 2 | 0 | 0 | 0 | 0 | 0 | 1 | 1 | 0 | 5 | 0 | 0 | 0 | 0 | 0 | 1 | 1 | 0 | 1 | 0 | 0 | 0 | 0 | 1 | 1 | 0 | 0 | 0  | 0 | 0  | 14 |    |
| OTU501 | 0 | 0 | 0 | 0 | 0 | 1 | 0 | 2 | 1 | 0 | 0 | 1 | 0 | 2 | 0 | 0 | 1 | 0 | 0 | 0 | 2 | 0 | 0 | 0 | 4 | 0 | 0 | 0  | 0 | 0  | 14 |    |
| OTU502 | 0 | 0 | 0 | 0 | 0 | 1 | 0 | 0 | 1 | 2 | 2 | 1 | 0 | 1 | 0 | 0 | 2 | 0 | 0 | 0 | 0 | 0 | 1 | 0 | 0 | 0 | 2 | 1  | 0 | 0  | 14 |    |
| OTU503 | 0 | 0 | 0 | 1 | 0 | 1 | 0 | 0 | 2 | 1 | 0 | 0 | 0 | 0 | 0 | 0 | 0 | 0 | 0 | 0 | 0 | 0 | 1 | 0 | 4 | 3 | 1 | 0  | 0 | 14 |    |    |
| OTU504 | 0 | 0 | 0 | 0 | 0 | 0 | 0 | 0 | 0 | 2 | 1 | 0 | 0 | 0 | 0 | 0 | 0 | 1 | 0 | 0 | 2 | 0 | 4 | 2 | 2 | 0 | 0 | 0  | 0 | 0  | 14 |    |
| OTU505 | 0 | 4 | 2 | 0 | 0 | 0 | 0 | 1 | 0 | 2 | 0 | 3 | 0 | 0 | 0 | 0 | 0 | 0 | 0 | 0 | 2 | 0 | 0 | 0 | 0 | 0 | 0 | 0  | 0 | 0  | 14 |    |
| OTU506 | 1 | 0 | 0 | 0 | 0 | 0 | 0 | 0 | 1 | 1 | 0 | 1 | 0 | 0 | 0 | 0 | 0 | 1 | 0 | 3 | 0 | 0 | 3 | 0 | 0 | 1 | 0 | 1  | 1 | 1  | 14 |    |
| OTU507 | 0 | 0 | 1 | 0 | 0 | 0 | 0 | 0 | 0 | 1 | 0 | 0 | 0 | 0 | 0 | 0 | 0 | 0 | 0 | 0 | 2 | 1 | 1 | 0 | 1 | 0 | 0 | 1  | 1 | 5  | 14 |    |
| OTU508 | 0 | 0 | 0 | 0 | 0 | 0 | 0 | 1 | 0 | 0 | 0 | 0 | 0 | 1 | 0 | 1 | 1 | 1 | 4 | 0 | 0 | 0 | 3 | 0 | 0 | 0 | 0 | 1  | 1 | 0  | 14 |    |
| OTU509 | 0 | 1 | 0 | 0 | 2 | 0 | 1 | 0 | 2 | 0 | 0 | 0 | 0 | 1 | 0 | 0 | 0 | 0 | 0 | 0 | 0 | 1 | 0 | 2 | 1 | 2 | 0 | 1  | 0 | 0  | 14 |    |









|        |   |   |   |    |   |   |   |   |   |   |   |   |   |   |   |   |   |   |   |   |   |   |   |   |   |   |   |   |   |    |    |
|--------|---|---|---|----|---|---|---|---|---|---|---|---|---|---|---|---|---|---|---|---|---|---|---|---|---|---|---|---|---|----|----|
| OTU588 | 0 | 0 | 0 | 0  | 0 | 0 | 0 | 0 | 0 | 0 | 0 | 1 | 0 | 0 | 0 | 2 | 0 | 0 | 0 | 1 | 0 | 2 | 3 | 0 | 0 | 1 | 0 | 0 | 0 | 0  | 10 |
| OTU589 | 0 | 0 | 1 | 0  | 0 | 1 | 0 | 0 | 0 | 0 | 0 | 0 | 0 | 1 | 0 | 1 | 1 | 1 | 1 | 0 | 0 | 0 | 0 | 0 | 0 | 2 | 1 | 0 | 0 | 10 |    |
| OTU590 | 3 | 0 | 0 | 0  | 0 | 1 | 1 | 0 | 0 | 0 | 1 | 2 | 0 | 1 | 0 | 0 | 0 | 0 | 0 | 0 | 1 | 0 | 0 | 0 | 0 | 0 | 0 | 0 | 0 | 10 |    |
| OTU591 | 0 | 1 | 0 | 1  | 1 | 0 | 0 | 0 | 0 | 0 | 0 | 0 | 0 | 0 | 0 | 1 | 0 | 0 | 1 | 0 | 0 | 3 | 0 | 0 | 1 | 0 | 0 | 0 | 1 | 10 |    |
| OTU592 | 0 | 0 | 0 | 0  | 0 | 0 | 0 | 0 | 0 | 0 | 0 | 0 | 0 | 0 | 0 | 5 | 0 | 0 | 0 | 0 | 0 | 0 | 0 | 0 | 0 | 5 | 0 | 0 | 0 | 10 |    |
| OTU593 | 2 | 0 | 0 | 0  | 0 | 0 | 0 | 0 | 0 | 4 | 0 | 1 | 0 | 0 | 0 | 0 | 0 | 0 | 0 | 1 | 0 | 2 | 0 | 0 | 0 | 0 | 0 | 0 | 0 | 10 |    |
| OTU594 | 0 | 1 | 0 | 0  | 1 | 0 | 1 | 0 | 0 | 0 | 0 | 0 | 0 | 2 | 0 | 0 | 0 | 0 | 1 | 2 | 1 | 0 | 0 | 0 | 0 | 0 | 0 | 1 | 0 | 10 |    |
| OTU595 | 0 | 0 | 0 | 0  | 0 | 0 | 0 | 0 | 0 | 3 | 0 | 0 | 4 | 0 | 0 | 0 | 0 | 1 | 0 | 0 | 0 | 1 | 0 | 0 | 0 | 1 | 0 | 0 | 0 | 10 |    |
| OTU596 | 0 | 0 | 0 | 0  | 0 | 0 | 3 | 0 | 0 | 0 | 0 | 2 | 0 | 0 | 0 | 0 | 0 | 0 | 0 | 0 | 0 | 3 | 1 | 1 | 0 | 0 | 0 | 0 | 0 | 10 |    |
| OTU597 | 0 | 0 | 0 | 1  | 0 | 0 | 1 | 0 | 0 | 0 | 0 | 0 | 0 | 0 | 0 | 5 | 0 | 0 | 0 | 0 | 0 | 2 | 1 | 0 | 0 | 0 | 0 | 0 | 0 | 10 |    |
| OTU598 | 0 | 0 | 0 | 0  | 0 | 0 | 0 | 0 | 0 | 0 | 0 | 0 | 0 | 0 | 0 | 0 | 0 | 0 | 5 | 0 | 0 | 0 | 0 | 0 | 0 | 0 | 0 | 0 | 0 | 5  | 10 |
| OTU599 | 0 | 0 | 0 | 10 | 0 | 0 | 0 | 0 | 0 | 0 | 0 | 0 | 0 | 0 | 0 | 0 | 0 | 0 | 0 | 0 | 0 | 0 | 0 | 0 | 0 | 0 | 0 | 0 | 0 | 0  | 10 |
| OTU600 | 0 | 0 | 0 | 0  | 1 | 0 | 0 | 0 | 0 | 2 | 0 | 0 | 0 | 0 | 2 | 1 | 0 | 0 | 0 | 0 | 0 | 3 | 0 | 0 | 0 | 0 | 0 | 0 | 1 | 0  | 10 |
| OTU601 | 0 | 0 | 0 | 0  | 0 | 0 | 0 | 1 | 2 | 0 | 0 | 1 | 0 | 1 | 1 | 1 | 0 | 0 | 1 | 1 | 0 | 0 | 0 | 1 | 0 | 0 | 0 | 0 | 0 | 0  | 10 |
| OTU602 | 0 | 0 | 0 | 0  | 0 | 0 | 0 | 0 | 0 | 0 | 0 | 0 | 0 | 0 | 0 | 0 | 0 | 0 | 0 | 0 | 7 | 0 | 0 | 0 | 0 | 0 | 0 | 0 | 2 | 1  | 10 |
| OTU603 | 0 | 0 | 0 | 0  | 0 | 0 | 0 | 0 | 0 | 3 | 0 | 0 | 0 | 0 | 0 | 0 | 0 | 0 | 0 | 0 | 6 | 0 | 0 | 0 | 0 | 0 | 0 | 1 | 0 | 10 |    |
| OTU604 | 0 | 0 | 0 | 0  | 0 | 0 | 0 | 1 | 2 | 2 | 0 | 0 | 0 | 0 | 0 | 1 | 0 | 0 | 0 | 0 | 0 | 0 | 0 | 1 | 0 | 0 | 0 | 0 | 2 | 1  | 10 |
| OTU605 | 1 | 1 | 1 | 0  | 0 | 0 | 0 | 1 | 0 | 0 | 1 | 0 | 0 | 0 | 0 | 0 | 0 | 0 | 0 | 0 | 1 | 0 | 1 | 0 | 3 | 0 | 0 | 0 | 0 | 0  | 10 |
| OTU606 | 9 | 0 | 0 | 0  | 0 | 0 | 0 | 0 | 0 | 0 | 0 | 0 | 0 | 0 | 0 | 0 | 0 | 0 | 0 | 0 | 0 | 0 | 0 | 0 | 0 | 0 | 0 | 0 | 0 | 0  | 9  |
| OTU607 | 1 | 0 | 1 | 0  | 0 | 0 | 0 | 0 | 0 | 0 | 0 | 0 | 2 | 0 | 1 | 0 | 0 | 0 | 1 | 0 | 1 | 0 | 0 | 0 | 0 | 0 | 0 | 0 | 0 | 2  | 9  |
| OTU608 | 0 | 0 | 0 | 0  | 0 | 0 | 0 | 0 | 0 | 0 | 0 | 1 | 2 | 1 | 0 | 0 | 0 | 0 | 1 | 0 | 0 | 2 | 0 | 0 | 1 | 0 | 0 | 0 | 0 | 1  | 9  |
| OTU609 | 0 | 0 | 1 | 0  | 2 | 2 | 0 | 0 | 1 | 0 | 0 | 0 | 0 | 0 | 1 | 1 | 0 | 0 | 1 | 0 | 0 | 0 | 0 | 0 | 0 | 0 | 0 | 0 | 0 | 0  | 9  |
| OTU610 | 0 | 0 | 0 | 0  | 0 | 2 | 0 | 0 | 2 | 0 | 3 | 0 | 1 | 0 | 1 | 0 | 0 | 0 | 0 | 0 | 0 | 0 | 0 | 0 | 0 | 0 | 0 | 0 | 0 | 0  | 9  |
| OTU611 | 0 | 0 | 0 | 0  | 1 | 0 | 0 | 0 | 0 | 2 | 0 | 0 | 0 | 0 | 2 | 0 | 0 | 0 | 1 | 0 | 0 | 0 | 0 | 0 | 1 | 0 | 0 | 2 | 0 | 0  | 9  |
| OTU612 | 2 | 0 | 0 | 0  | 0 | 0 | 1 | 0 | 0 | 0 | 0 | 0 | 0 | 0 | 1 | 1 | 0 | 0 | 1 | 0 | 3 | 0 | 0 | 0 | 0 | 0 | 0 | 0 | 0 | 0  | 9  |
| OTU613 | 0 | 0 | 3 | 0  | 0 | 0 | 0 | 1 | 0 | 0 | 0 | 1 | 0 | 0 | 0 | 0 | 0 | 0 | 0 | 0 | 0 | 0 | 0 | 0 | 0 | 2 | 0 | 0 | 2 | 0  | 9  |





---

|        |   |   |   |   |   |   |   |   |   |   |   |   |   |   |   |   |   |   |   |   |   |   |   |   |   |   |   |   |   |   |   |
|--------|---|---|---|---|---|---|---|---|---|---|---|---|---|---|---|---|---|---|---|---|---|---|---|---|---|---|---|---|---|---|---|
| OTU666 | 0 | 0 | 0 | 0 | 0 | 0 | 0 | 0 | 0 | 0 | 0 | 0 | 0 | 0 | 0 | 0 | 0 | 0 | 0 | 0 | 0 | 0 | 0 | 0 | 0 | 0 | 0 | 8 | 0 | 0 | 8 |
| OTU667 | 0 | 0 | 1 | 0 | 1 | 1 | 0 | 0 | 0 | 1 | 0 | 0 | 0 | 0 | 0 | 0 | 0 | 0 | 0 | 1 | 0 | 0 | 1 | 1 | 0 | 0 | 0 | 1 | 0 | 8 |   |
| OTU668 | 0 | 5 | 0 | 0 | 3 | 0 | 0 | 0 | 0 | 0 | 0 | 0 | 0 | 0 | 0 | 0 | 0 | 0 | 0 | 0 | 0 | 0 | 0 | 0 | 0 | 0 | 0 | 0 | 0 | 8 |   |
| OTU669 | 1 | 1 | 0 | 0 | 0 | 0 | 0 | 1 | 0 | 0 | 0 | 0 | 0 | 1 | 0 | 0 | 0 | 2 | 0 | 0 | 0 | 0 | 0 | 0 | 0 | 0 | 1 | 0 | 1 | 8 |   |
| OTU670 | 0 | 0 | 0 | 0 | 0 | 0 | 0 | 0 | 0 | 0 | 0 | 0 | 0 | 0 | 4 | 0 | 0 | 0 | 0 | 0 | 0 | 0 | 0 | 4 | 0 | 0 | 0 | 0 | 0 | 8 |   |
| OTU671 | 0 | 1 | 0 | 0 | 0 | 0 | 0 | 0 | 0 | 0 | 1 | 0 | 0 | 1 | 0 | 0 | 1 | 0 | 0 | 0 | 0 | 0 | 2 | 0 | 1 | 0 | 0 | 0 | 0 | 1 | 8 |
| OTU672 | 0 | 1 | 0 | 0 | 0 | 0 | 0 | 1 | 0 | 0 | 0 | 0 | 0 | 0 | 0 | 0 | 0 | 1 | 0 | 3 | 0 | 1 | 0 | 0 | 1 | 0 | 0 | 0 | 0 | 8 |   |
| OTU673 | 0 | 0 | 0 | 0 | 0 | 0 | 0 | 0 | 1 | 1 | 0 | 1 | 0 | 0 | 0 | 1 | 0 | 0 | 0 | 0 | 1 | 0 | 0 | 0 | 1 | 0 | 0 | 1 | 1 | 8 |   |
| OTU674 | 0 | 1 | 0 | 2 | 0 | 0 | 0 | 0 | 0 | 0 | 0 | 0 | 0 | 0 | 0 | 0 | 0 | 0 | 0 | 0 | 1 | 1 | 0 | 0 | 0 | 1 | 0 | 2 | 0 | 8 |   |
| OTU675 | 1 | 0 | 0 | 0 | 0 | 0 | 0 | 0 | 0 | 2 | 0 | 1 | 0 | 0 | 1 | 0 | 0 | 0 | 1 | 0 | 0 | 0 | 0 | 0 | 0 | 1 | 0 | 0 | 1 | 0 | 8 |
| OTU676 | 0 | 0 | 0 | 0 | 0 | 0 | 0 | 0 | 0 | 0 | 0 | 0 | 0 | 0 | 0 | 0 | 0 | 5 | 3 | 0 | 0 | 0 | 0 | 0 | 0 | 0 | 0 | 0 | 0 | 8 |   |
| OTU677 | 0 | 0 | 0 | 1 | 0 | 1 | 0 | 0 | 0 | 0 | 1 | 2 | 0 | 0 | 0 | 0 | 1 | 0 | 0 | 0 | 0 | 0 | 0 | 0 | 0 | 1 | 1 | 0 | 0 | 8 |   |
| OTU678 | 2 | 0 | 0 | 0 | 0 | 0 | 0 | 0 | 0 | 3 | 0 | 3 | 0 | 0 | 0 | 0 | 0 | 0 | 0 | 0 | 0 | 0 | 0 | 0 | 0 | 0 | 0 | 0 | 0 | 8 |   |
| OTU679 | 0 | 0 | 0 | 0 | 3 | 0 | 0 | 0 | 0 | 0 | 0 | 0 | 0 | 0 | 0 | 2 | 0 | 0 | 0 | 0 | 0 | 0 | 0 | 0 | 0 | 1 | 1 | 1 | 0 | 0 | 8 |
| OTU680 | 1 | 0 | 0 | 0 | 0 | 0 | 0 | 0 | 0 | 0 | 2 | 0 | 1 | 1 | 3 | 0 | 0 | 0 | 0 | 0 | 0 | 0 | 0 | 0 | 0 | 0 | 0 | 0 | 0 | 8 |   |
| OTU681 | 0 | 0 | 1 | 0 | 0 | 0 | 0 | 0 | 0 | 0 | 0 | 3 | 0 | 1 | 0 | 0 | 0 | 0 | 0 | 0 | 0 | 0 | 0 | 0 | 0 | 0 | 0 | 3 | 0 | 8 |   |
| OTU682 | 0 | 0 | 0 | 1 | 0 | 1 | 0 | 0 | 0 | 0 | 0 | 0 | 0 | 0 | 0 | 0 | 0 | 0 | 1 | 0 | 0 | 0 | 0 | 1 | 0 | 0 | 4 | 0 | 0 | 8 |   |
| OTU683 | 0 | 0 | 0 | 0 | 0 | 0 | 0 | 0 | 0 | 0 | 0 | 0 | 0 | 1 | 1 | 3 | 0 | 0 | 1 | 0 | 0 | 2 | 0 | 0 | 0 | 0 | 0 | 0 | 0 | 8 |   |
| OTU684 | 1 | 7 | 0 | 0 | 0 | 0 | 0 | 0 | 0 | 0 | 0 | 0 | 0 | 0 | 0 | 0 | 0 | 0 | 0 | 0 | 0 | 0 | 0 | 0 | 0 | 0 | 0 | 0 | 8 |   |   |
| OTU685 | 0 | 0 | 6 | 0 | 0 | 0 | 0 | 0 | 0 | 0 | 0 | 0 | 0 | 0 | 0 | 0 | 0 | 0 | 0 | 0 | 0 | 2 | 0 | 0 | 0 | 0 | 0 | 0 | 0 | 8 |   |
| OTU686 | 0 | 0 | 0 | 0 | 0 | 0 | 0 | 0 | 0 | 0 | 0 | 3 | 0 | 0 | 0 | 0 | 0 | 0 | 0 | 0 | 1 | 0 | 2 | 0 | 0 | 1 | 0 | 1 | 0 | 8 |   |
| OTU687 | 2 | 0 | 0 | 0 | 0 | 0 | 0 | 0 | 0 | 0 | 0 | 0 | 0 | 0 | 0 | 0 | 0 | 0 | 0 | 0 | 0 | 3 | 0 | 2 | 0 | 0 | 0 | 0 | 0 | 7 |   |
| OTU688 | 0 | 0 | 0 | 0 | 0 | 1 | 0 | 1 | 0 | 0 | 0 | 0 | 0 | 1 | 0 | 0 | 0 | 0 | 0 | 0 | 0 | 0 | 0 | 0 | 0 | 0 | 0 | 4 | 0 | 7 |   |
| OTU689 | 0 | 0 | 0 | 0 | 0 | 0 | 0 | 5 | 0 | 0 | 0 | 0 | 0 | 0 | 0 | 0 | 0 | 0 | 0 | 0 | 0 | 0 | 0 | 0 | 2 | 0 | 0 | 0 | 0 | 7 |   |
| OTU690 | 0 | 0 | 0 | 0 | 0 | 1 | 0 | 0 | 0 | 4 | 0 | 0 | 0 | 0 | 1 | 1 | 0 | 0 | 0 | 0 | 0 | 0 | 0 | 0 | 0 | 0 | 0 | 0 | 0 | 7 |   |
| OTU691 | 1 | 1 | 2 | 0 | 0 | 0 | 0 | 0 | 0 | 0 | 0 | 0 | 0 | 0 | 0 | 1 | 0 | 0 | 0 | 1 | 0 | 0 | 0 | 0 | 1 | 0 | 0 | 0 | 0 | 7 |   |

---

|        |   |   |   |   |   |   |   |   |   |   |   |   |   |   |   |   |   |   |   |   |   |   |   |   |   |   |   |   |   |   |   |   |
|--------|---|---|---|---|---|---|---|---|---|---|---|---|---|---|---|---|---|---|---|---|---|---|---|---|---|---|---|---|---|---|---|---|
| OTU692 | 0 | 1 | 0 | 0 | 0 | 0 | 0 | 0 | 0 | 0 | 0 | 0 | 0 | 0 | 0 | 0 | 0 | 0 | 0 | 0 | 0 | 0 | 0 | 0 | 0 | 1 | 3 | 0 | 1 | 0 | 7 |   |
| OTU693 | 0 | 0 | 1 | 0 | 0 | 0 | 0 | 0 | 1 | 0 | 0 | 0 | 0 | 1 | 2 | 0 | 0 | 0 | 0 | 0 | 0 | 0 | 0 | 0 | 0 | 0 | 0 | 0 | 1 | 1 | 7 |   |
| OTU694 | 0 | 0 | 0 | 0 | 0 | 0 | 0 | 0 | 0 | 0 | 0 | 0 | 0 | 0 | 0 | 0 | 0 | 2 | 0 | 0 | 0 | 2 | 3 | 0 | 0 | 0 | 0 | 0 | 0 | 7 |   |   |
| OTU695 | 1 | 0 | 0 | 0 | 0 | 1 | 0 | 1 | 1 | 0 | 0 | 0 | 0 | 0 | 1 | 0 | 1 | 0 | 0 | 1 | 0 | 0 | 0 | 0 | 0 | 0 | 0 | 0 | 0 | 7 |   |   |
| OTU696 | 1 | 0 | 0 | 0 | 0 | 1 | 0 | 0 | 0 | 0 | 0 | 1 | 1 | 0 | 0 | 0 | 0 | 0 | 0 | 0 | 0 | 0 | 0 | 3 | 0 | 0 | 0 | 0 | 0 | 7 |   |   |
| OTU697 | 0 | 0 | 0 | 0 | 0 | 0 | 0 | 0 | 3 | 0 | 0 | 1 | 0 | 0 | 0 | 1 | 0 | 0 | 0 | 0 | 0 | 1 | 0 | 0 | 0 | 0 | 0 | 0 | 0 | 1 | 7 |   |
| OTU698 | 1 | 0 | 0 | 0 | 0 | 0 | 0 | 4 | 0 | 1 | 0 | 0 | 0 | 0 | 0 | 0 | 0 | 0 | 0 | 0 | 1 | 0 | 0 | 0 | 0 | 0 | 0 | 0 | 0 | 7 |   |   |
| OTU699 | 1 | 0 | 0 | 0 | 0 | 0 | 0 | 1 | 0 | 0 | 0 | 0 | 0 | 0 | 0 | 0 | 0 | 1 | 1 | 0 | 0 | 0 | 0 | 0 | 1 | 0 | 0 | 0 | 0 | 2 | 7 |   |
| OTU700 | 0 | 0 | 0 | 1 | 0 | 0 | 0 | 0 | 0 | 0 | 0 | 0 | 0 | 0 | 0 | 0 | 4 | 0 | 2 | 0 | 0 | 0 | 0 | 0 | 0 | 0 | 0 | 0 | 0 | 0 | 7 |   |
| OTU701 | 2 | 0 | 0 | 0 | 0 | 1 | 0 | 0 | 1 | 0 | 0 | 0 | 0 | 0 | 0 | 1 | 1 | 0 | 0 | 0 | 0 | 0 | 0 | 0 | 0 | 0 | 0 | 1 | 0 | 0 | 7 |   |
| OTU702 | 0 | 0 | 0 | 0 | 0 | 0 | 1 | 0 | 5 | 0 | 0 | 0 | 0 | 0 | 0 | 0 | 0 | 0 | 0 | 0 | 0 | 0 | 0 | 0 | 0 | 0 | 0 | 0 | 0 | 0 | 1 | 7 |
| OTU703 | 0 | 0 | 0 | 0 | 0 | 0 | 0 | 0 | 0 | 0 | 0 | 0 | 0 | 0 | 0 | 0 | 0 | 0 | 0 | 0 | 0 | 0 | 3 | 0 | 0 | 0 | 0 | 4 | 0 | 0 | 7 |   |
| OTU704 | 3 | 0 | 1 | 0 | 0 | 0 | 0 | 0 | 1 | 1 | 0 | 0 | 0 | 0 | 0 | 0 | 0 | 0 | 0 | 0 | 0 | 1 | 0 | 0 | 0 | 0 | 0 | 0 | 0 | 0 | 7 |   |
| OTU705 | 0 | 0 | 0 | 0 | 0 | 0 | 1 | 0 | 0 | 0 | 0 | 0 | 0 | 0 | 0 | 2 | 0 | 0 | 1 | 0 | 0 | 0 | 0 | 0 | 0 | 0 | 0 | 2 | 1 | 0 | 7 |   |
| OTU706 | 0 | 0 | 0 | 0 | 0 | 0 | 0 | 0 | 0 | 0 | 2 | 1 | 0 | 0 | 1 | 0 | 1 | 0 | 0 | 2 | 0 | 0 | 0 | 0 | 0 | 0 | 0 | 0 | 0 | 0 | 7 |   |
| OTU707 | 2 | 0 | 0 | 0 | 0 | 0 | 0 | 0 | 2 | 1 | 1 | 0 | 0 | 0 | 0 | 1 | 0 | 0 | 0 | 0 | 0 | 0 | 0 | 0 | 0 | 0 | 0 | 0 | 0 | 0 | 7 |   |
| OTU708 | 0 | 0 | 2 | 0 | 0 | 0 | 0 | 0 | 0 | 0 | 0 | 0 | 0 | 0 | 0 | 0 | 1 | 0 | 0 | 4 | 0 | 0 | 0 | 0 | 0 | 0 | 0 | 0 | 0 | 0 | 7 |   |
| OTU709 | 0 | 0 | 1 | 0 | 0 | 0 | 1 | 0 | 0 | 0 | 0 | 0 | 0 | 0 | 0 | 4 | 0 | 1 | 0 | 0 | 0 | 0 | 0 | 0 | 0 | 0 | 0 | 0 | 0 | 0 | 7 |   |
| OTU710 | 0 | 0 | 0 | 0 | 0 | 0 | 0 | 0 | 0 | 0 | 0 | 1 | 1 | 0 | 0 | 0 | 1 | 0 | 1 | 1 | 0 | 0 | 0 | 0 | 0 | 1 | 0 | 0 | 1 | 0 | 7 |   |
| OTU711 | 0 | 0 | 0 | 0 | 0 | 0 | 0 | 0 | 0 | 0 | 0 | 0 | 0 | 0 | 0 | 0 | 0 | 0 | 0 | 0 | 0 | 0 | 0 | 0 | 0 | 0 | 0 | 0 | 7 | 0 | 7 |   |
| OTU712 | 1 | 0 | 4 | 0 | 2 | 0 | 0 | 0 | 0 | 0 | 0 | 0 | 0 | 0 | 0 | 0 | 0 | 0 | 0 | 0 | 0 | 0 | 0 | 0 | 0 | 0 | 0 | 0 | 0 | 0 | 7 |   |
| OTU713 | 0 | 0 | 1 | 0 | 0 | 0 | 0 | 1 | 0 | 1 | 1 | 0 | 0 | 1 | 1 | 0 | 0 | 0 | 0 | 0 | 0 | 0 | 0 | 0 | 0 | 0 | 0 | 0 | 1 | 0 | 7 |   |
| OTU714 | 0 | 0 | 0 | 0 | 0 | 0 | 0 | 0 | 0 | 1 | 0 | 0 | 0 | 0 | 0 | 0 | 0 | 0 | 0 | 0 | 1 | 0 | 0 | 0 | 0 | 0 | 0 | 0 | 2 | 3 | 7 |   |
| OTU715 | 0 | 0 | 0 | 0 | 0 | 2 | 0 | 0 | 0 | 0 | 0 | 0 | 0 | 0 | 0 | 0 | 0 | 0 | 0 | 0 | 0 | 0 | 0 | 0 | 0 | 0 | 3 | 0 | 0 | 2 | 7 |   |
| OTU716 | 1 | 0 | 0 | 0 | 0 | 1 | 0 | 0 | 0 | 0 | 0 | 1 | 0 | 0 | 1 | 0 | 0 | 0 | 1 | 0 | 0 | 0 | 0 | 0 | 1 | 0 | 1 | 0 | 0 | 0 | 7 |   |
| OTU717 | 0 | 0 | 0 | 0 | 0 | 0 | 0 | 0 | 0 | 0 | 0 | 0 | 0 | 0 | 0 | 0 | 0 | 0 | 1 | 0 | 3 | 0 | 0 | 0 | 0 | 0 | 3 | 0 | 0 | 0 | 7 |   |









|        |    |    |    |    |    |    |    |    |    |     |     |    |     |    |    |    |    |    |    |   |    |     |   |    |    |    |    |    |     |      |     |
|--------|----|----|----|----|----|----|----|----|----|-----|-----|----|-----|----|----|----|----|----|----|---|----|-----|---|----|----|----|----|----|-----|------|-----|
| OTU796 | 0  | 0  | 1  | 0  | 1  | 0  | 1  | 0  | 0  | 0   | 0   | 0  | 0   | 0  | 0  | 0  | 0  | 0  | 0  | 0 | 2  | 0   | 0 | 0  | 0  | 0  | 0  | 0  | 0   | 5    |     |
| OTU797 | 0  | 0  | 4  | 0  | 0  | 0  | 0  | 0  | 0  | 0   | 0   | 0  | 0   | 0  | 0  | 1  | 0  | 0  | 0  | 0 | 0  | 0   | 0 | 0  | 0  | 0  | 0  | 0  | 0   | 5    |     |
| OTU798 | 0  | 1  | 0  | 0  | 1  | 0  | 1  | 0  | 0  | 0   | 0   | 0  | 0   | 0  | 1  | 0  | 0  | 0  | 0  | 1 | 0  | 0   | 0 | 0  | 0  | 0  | 0  | 0  | 0   | 5    |     |
| OTU799 | 0  | 0  | 0  | 2  | 0  | 0  | 0  | 1  | 1  | 1   | 0   | 0  | 0   | 0  | 0  | 0  | 0  | 0  | 0  | 0 | 0  | 0   | 0 | 0  | 0  | 0  | 0  | 0  | 0   | 5    |     |
| OTU800 | 0  | 0  | 0  | 0  | 0  | 0  | 0  | 0  | 0  | 0   | 0   | 0  | 0   | 0  | 0  | 0  | 0  | 0  | 0  | 0 | 5  | 0   | 0 | 0  | 0  | 0  | 0  | 0  | 0   | 5    |     |
| OTU801 | 0  | 0  | 0  | 0  | 0  | 0  | 0  | 0  | 0  | 1   | 1   | 1  | 0   | 0  | 0  | 0  | 0  | 1  | 0  | 0 | 0  | 1   | 0 | 0  | 0  | 0  | 0  | 0  | 0   | 5    |     |
| OTU802 | 0  | 0  | 0  | 0  | 0  | 1  | 0  | 0  | 0  | 0   | 0   | 0  | 0   | 0  | 1  | 0  | 0  | 0  | 1  | 0 | 0  | 0   | 0 | 0  | 0  | 0  | 0  | 1  | 1   | 5    |     |
| OTU803 | 0  | 0  | 0  | 0  | 0  | 0  | 0  | 0  | 0  | 0   | 0   | 1  | 0   | 0  | 0  | 0  | 0  | 0  | 0  | 0 | 0  | 0   | 0 | 0  | 4  | 0  | 0  | 0  | 0   | 5    |     |
| OTU804 | 0  | 0  | 0  | 0  | 0  | 0  | 0  | 0  | 0  | 0   | 0   | 0  | 0   | 0  | 0  | 0  | 0  | 4  | 0  | 0 | 0  | 0   | 0 | 0  | 0  | 0  | 0  | 1  | 0   | 5    |     |
| OTU805 | 0  | 0  | 0  | 0  | 0  | 0  | 0  | 0  | 0  | 0   | 0   | 0  | 0   | 0  | 0  | 0  | 0  | 0  | 0  | 3 | 0  | 0   | 0 | 0  | 0  | 2  | 0  | 0  | 0   | 5    |     |
| OTU806 | 0  | 0  | 0  | 0  | 0  | 0  | 0  | 0  | 0  | 1   | 0   | 0  | 0   | 0  | 0  | 0  | 1  | 1  | 0  | 0 | 0  | 0   | 1 | 0  | 1  | 0  | 0  | 0  | 0   | 5    |     |
| OTU807 | 0  | 0  | 1  | 1  | 1  | 0  | 0  | 0  | 0  | 0   | 0   | 0  | 0   | 1  | 0  | 0  | 0  | 0  | 0  | 0 | 0  | 0   | 0 | 0  | 1  | 0  | 0  | 0  | 0   | 5    |     |
| OTU808 | 0  | 0  | 0  | 0  | 2  | 0  | 0  | 0  | 0  | 0   | 0   | 0  | 0   | 0  | 1  | 0  | 1  | 0  | 0  | 0 | 0  | 0   | 1 | 0  | 0  | 0  | 0  | 0  | 0   | 5    |     |
| OTU809 | 0  | 0  | 0  | 0  | 0  | 0  | 0  | 0  | 0  | 2   | 0   | 0  | 0   | 1  | 0  | 0  | 0  | 2  | 0  | 0 | 0  | 0   | 0 | 0  | 0  | 0  | 0  | 0  | 0   | 5    |     |
| OTU810 | 0  | 0  | 0  | 0  | 0  | 1  | 0  | 1  | 0  | 0   | 0   | 0  | 0   | 0  | 0  | 0  | 0  | 0  | 0  | 0 | 0  | 1   | 2 | 0  | 0  | 0  | 0  | 0  | 0   | 5    |     |
| OTU811 | 0  | 0  | 0  | 2  | 0  | 0  | 0  | 0  | 0  | 0   | 0   | 0  | 0   | 0  | 0  | 0  | 0  | 0  | 0  | 0 | 0  | 0   | 0 | 1  | 2  | 0  | 0  | 0  | 0   | 5    |     |
| OTU812 | 0  | 0  | 0  | 0  | 0  | 0  | 0  | 0  | 0  | 0   | 0   | 0  | 0   | 0  | 0  | 0  | 0  | 0  | 0  | 0 | 0  | 0   | 2 | 0  | 0  | 0  | 1  | 0  | 2   | 5    |     |
| OTU813 | 0  | 0  | 0  | 0  | 0  | 0  | 0  | 0  | 0  | 0   | 0   | 0  | 3   | 0  | 0  | 0  | 0  | 0  | 0  | 0 | 1  | 0   | 0 | 0  | 0  | 1  | 0  | 0  | 0   | 5    |     |
| OTU814 | 0  | 0  | 0  | 2  | 3  | 0  | 0  | 0  | 0  | 0   | 0   | 0  | 0   | 0  | 0  | 0  | 0  | 0  | 0  | 0 | 0  | 0   | 0 | 0  | 0  | 0  | 0  | 0  | 0   | 5    |     |
| OTU815 | 0  | 0  | 0  | 0  | 0  | 1  | 1  | 0  | 0  | 0   | 0   | 2  | 0   | 1  | 0  | 0  | 0  | 0  | 0  | 0 | 0  | 0   | 0 | 0  | 0  | 0  | 0  | 0  | 0   | 5    |     |
| OTU816 | 0  | 0  | 0  | 1  | 0  | 0  | 0  | 0  | 0  | 2   | 0   | 0  | 0   | 0  | 0  | 1  | 0  | 0  | 0  | 0 | 0  | 0   | 0 | 1  | 0  | 0  | 0  | 0  | 0   | 5    |     |
| OTU817 | 0  | 0  | 0  | 0  | 0  | 0  | 80 | 5  | 12 | 762 | 943 | 0  | 193 | 0  | 36 | 12 | 0  | 3  | 0  | 0 | 0  | 0   | 0 | 0  | 0  | 0  | 0  | 0  | 0   | 2046 |     |
| OTU818 | 35 | 35 | 24 | 45 | 29 | 51 | 19 | 36 | 38 | 23  | 9   | 17 | 7   | 14 | 7  | 11 | 10 | 3  | 15 | 5 | 18 | 2   | 6 | 0  | 1  | 14 | 32 | 33 | 36  | 66   | 641 |
| OTU819 | 0  | 3  | 11 | 0  | 1  | 0  | 1  | 0  | 10 | 1   | 172 | 38 | 15  | 3  | 0  | 0  | 0  | 16 | 1  | 3 | 0  | 7   | 5 | 29 | 16 | 1  | 10 | 2  | 144 | 103  | 592 |
| OTU820 | 0  | 0  | 0  | 0  | 0  | 0  | 1  | 0  | 0  | 0   | 0   | 1  | 2   | 17 | 0  | 0  | 0  | 2  | 51 | 1 | 57 | 11  | 5 | 1  | 10 | 9  | 4  | 4  | 56  | 267  | 499 |
| OTU821 | 4  | 12 | 0  | 14 | 4  | 2  | 0  | 0  | 0  | 0   | 0   | 0  | 0   | 0  | 0  | 0  | 0  | 0  | 0  | 8 | 14 | 344 | 6 | 4  | 29 | 4  | 22 | 18 | 4   | 489  |     |



|        |    |    |   |    |    |    |    |   |    |    |    |    |    |    |    |    |   |    |    |    |    |   |    |    |   |    |   |   |   |    |     |
|--------|----|----|---|----|----|----|----|---|----|----|----|----|----|----|----|----|---|----|----|----|----|---|----|----|---|----|---|---|---|----|-----|
| OTU848 | 0  | 0  | 0 | 0  | 0  | 0  | 0  | 0 | 0  | 4  | 1  | 0  | 0  | 0  | 2  | 0  | 0 | 0  | 20 | 0  | 2  | 0 | 18 | 67 | 0 | 0  | 1 | 0 | 0 | 1  | 116 |
| OTU849 | 0  | 0  | 0 | 0  | 0  | 0  | 0  | 0 | 0  | 29 | 10 | 0  | 2  | 0  | 0  | 0  | 0 | 68 | 0  | 0  | 0  | 0 | 2  | 4  | 0 | 0  | 0 | 0 | 0 | 0  | 115 |
| OTU850 | 0  | 0  | 0 | 0  | 0  | 0  | 0  | 0 | 0  | 2  | 0  | 4  | 0  | 0  | 0  | 18 | 0 | 87 | 0  | 0  | 0  | 0 | 0  | 0  | 0 | 0  | 0 | 0 | 0 | 0  | 111 |
| OTU851 | 0  | 3  | 0 | 21 | 13 | 16 | 1  | 2 | 0  | 0  | 0  | 2  | 0  | 8  | 0  | 0  | 2 | 0  | 4  | 0  | 8  | 0 | 15 | 3  | 1 | 4  | 6 | 0 | 2 | 0  | 111 |
| OTU852 | 0  | 54 | 1 | 0  | 0  | 1  | 5  | 8 | 0  | 5  | 4  | 0  | 25 | 0  | 0  | 0  | 0 | 0  | 2  | 0  | 0  | 0 | 0  | 1  | 0 | 0  | 0 | 0 | 0 | 0  | 106 |
| OTU853 | 0  | 0  | 0 | 0  | 0  | 0  | 1  | 0 | 2  | 9  | 14 | 0  | 18 | 8  | 0  | 0  | 0 | 14 | 3  | 18 | 0  | 4 | 7  | 3  | 2 | 1  | 0 | 0 | 2 | 0  | 106 |
| OTU854 | 2  | 4  | 0 | 2  | 3  | 1  | 1  | 2 | 6  | 3  | 0  | 0  | 2  | 3  | 7  | 5  | 5 | 1  | 3  | 5  | 6  | 8 | 3  | 1  | 3 | 1  | 7 | 4 | 7 | 5  | 100 |
| OTU855 | 1  | 2  | 2 | 3  | 1  | 1  | 2  | 6 | 4  | 0  | 1  | 16 | 1  | 2  | 3  | 3  | 1 | 1  | 1  | 3  | 4  | 4 | 5  | 1  | 2 | 1  | 1 | 4 | 2 | 17 | 95  |
| OTU856 | 60 | 2  | 0 | 15 | 6  | 5  | 0  | 1 | 0  | 0  | 0  | 0  | 0  | 0  | 0  | 0  | 0 | 0  | 0  | 0  | 0  | 0 | 0  | 1  | 0 | 0  | 0 | 0 | 0 | 1  | 91  |
| OTU857 | 0  | 0  | 0 | 0  | 0  | 0  | 0  | 0 | 0  | 0  | 0  | 0  | 0  | 2  | 0  | 0  | 0 | 4  | 11 | 0  | 0  | 3 | 3  | 51 | 1 | 1  | 0 | 0 | 0 | 12 | 88  |
| OTU858 | 0  | 0  | 0 | 0  | 0  | 0  | 7  | 0 | 0  | 57 | 0  | 0  | 17 | 0  | 3  | 0  | 0 | 0  | 0  | 0  | 0  | 0 | 0  | 0  | 0 | 0  | 0 | 0 | 0 | 0  | 84  |
| OTU859 | 0  | 0  | 0 | 0  | 0  | 0  | 0  | 0 | 66 | 3  | 8  | 4  | 0  | 0  | 0  | 0  | 0 | 0  | 0  | 0  | 0  | 2 | 0  | 0  | 0 | 0  | 0 | 0 | 0 | 0  | 83  |
| OTU860 | 0  | 0  | 0 | 0  | 0  | 0  | 10 | 3 | 5  | 9  | 3  | 8  | 17 | 0  | 4  | 2  | 1 | 13 | 7  | 0  | 0  | 0 | 0  | 0  | 1 | 0  | 0 | 0 | 0 | 0  | 83  |
| OTU861 | 0  | 0  | 1 | 1  | 0  | 1  | 0  | 1 | 0  | 0  | 3  | 2  | 0  | 1  | 4  | 5  | 9 | 6  | 8  | 8  | 9  | 4 | 6  | 0  | 2 | 2  | 0 | 5 | 0 | 2  | 80  |
| OTU862 | 0  | 0  | 0 | 0  | 0  | 0  | 0  | 0 | 0  | 12 | 12 | 0  | 8  | 0  | 11 | 1  | 0 | 11 | 0  | 0  | 0  | 2 | 0  | 14 | 7 | 0  | 0 | 0 | 0 | 0  | 78  |
| OTU863 | 0  | 0  | 0 | 0  | 0  | 0  | 0  | 0 | 0  | 0  | 0  | 0  | 0  | 24 | 0  | 0  | 0 | 0  | 2  | 0  | 5  | 3 | 3  | 13 | 1 | 4  | 3 | 0 | 6 | 14 | 78  |
| OTU864 | 6  | 7  | 3 | 1  | 2  | 9  | 2  | 5 | 9  | 2  | 4  | 6  | 1  | 7  | 9  | 1  | 0 | 0  | 0  | 0  | 0  | 1 | 1  | 0  | 0 | 0  | 0 | 0 | 1 | 0  | 77  |
| OTU865 | 0  | 0  | 0 | 0  | 0  | 0  | 0  | 0 | 0  | 0  | 0  | 0  | 0  | 0  | 0  | 2  | 0 | 74 | 0  | 0  | 0  | 0 | 0  | 0  | 0 | 0  | 0 | 0 | 0 | 0  | 76  |
| OTU866 | 0  | 0  | 0 | 0  | 0  | 0  | 0  | 0 | 0  | 0  | 0  | 1  | 0  | 4  | 0  | 0  | 0 | 0  | 8  | 0  | 8  | 0 | 0  | 0  | 0 | 1  | 0 | 0 | 2 | 51 | 75  |
| OTU867 | 0  | 0  | 0 | 0  | 0  | 0  | 0  | 0 | 0  | 0  | 0  | 0  | 0  | 0  | 20 | 0  | 0 | 0  | 0  | 0  | 11 | 0 | 0  | 5  | 0 | 37 | 0 | 0 | 0 | 0  | 73  |
| OTU868 | 0  | 0  | 0 | 0  | 0  | 0  | 0  | 0 | 2  | 2  | 6  | 1  | 10 | 1  | 1  | 0  | 0 | 7  | 2  | 10 | 0  | 7 | 13 | 1  | 1 | 1  | 4 | 0 | 3 | 0  | 72  |
| OTU869 | 0  | 0  | 0 | 0  | 0  | 0  | 0  | 0 | 3  | 3  | 18 | 1  | 9  | 0  | 7  | 0  | 0 | 4  | 0  | 0  | 0  | 0 | 6  | 14 | 2 | 0  | 1 | 0 | 0 | 0  | 68  |
| OTU870 | 0  | 0  | 0 | 0  | 0  | 0  | 0  | 0 | 0  | 0  | 0  | 0  | 0  | 0  | 0  | 0  | 0 | 2  | 5  | 1  | 0  | 1 | 1  | 49 | 1 | 0  | 0 | 0 | 0 | 8  | 68  |
| OTU871 | 1  | 0  | 0 | 0  | 4  | 0  | 0  | 0 | 0  | 0  | 0  | 3  | 1  | 2  | 0  | 2  | 0 | 0  | 1  | 0  | 1  | 0 | 2  | 45 | 0 | 1  | 0 | 0 | 0 | 5  | 68  |
| OTU872 | 30 | 1  | 6 | 4  | 0  | 1  | 1  | 1 | 0  | 7  | 0  | 1  | 5  | 0  | 0  | 0  | 0 | 0  | 2  | 2  | 1  | 1 | 1  | 1  | 0 | 0  | 0 | 0 | 0 | 2  | 67  |
| OTU873 | 0  | 0  | 0 | 0  | 0  | 0  | 0  | 0 | 0  | 0  | 0  | 0  | 1  | 2  | 0  | 0  | 0 | 1  | 12 | 0  | 7  | 0 | 2  | 2  | 3 | 0  | 0 | 0 | 1 | 36 | 67  |



|        |    |    |   |   |    |   |   |    |   |   |    |    |    |    |   |   |   |    |   |   |   |   |    |    |   |   |   |   |   |   |    |
|--------|----|----|---|---|----|---|---|----|---|---|----|----|----|----|---|---|---|----|---|---|---|---|----|----|---|---|---|---|---|---|----|
| OTU900 | 0  | 1  | 0 | 0 | 5  | 3 | 0 | 0  | 2 | 0 | 1  | 2  | 0  | 6  | 1 | 0 | 0 | 4  | 0 | 1 | 0 | 1 | 6  | 0  | 0 | 1 | 0 | 3 | 1 | 1 | 39 |
| OTU901 | 0  | 0  | 0 | 0 | 13 | 8 | 1 | 0  | 0 | 6 | 10 | 0  | 0  | 0  | 0 | 0 | 0 | 0  | 0 | 0 | 0 | 0 | 0  | 0  | 0 | 0 | 0 | 0 | 0 | 0 | 38 |
| OTU902 | 0  | 0  | 0 | 0 | 0  | 0 | 0 | 0  | 0 | 0 | 0  | 0  | 0  | 0  | 0 | 0 | 0 | 0  | 0 | 0 | 0 | 0 | 32 | 0  | 2 | 0 | 0 | 0 | 0 | 4 | 38 |
| OTU903 | 0  | 0  | 0 | 0 | 0  | 0 | 1 | 0  | 0 | 2 | 3  | 0  | 8  | 10 | 0 | 0 | 0 | 0  | 0 | 0 | 0 | 0 | 11 | 3  | 0 | 0 | 0 | 0 | 0 | 0 | 38 |
| OTU904 | 35 | 0  | 0 | 0 | 0  | 0 | 0 | 0  | 0 | 0 | 0  | 0  | 0  | 0  | 0 | 0 | 0 | 0  | 0 | 0 | 2 | 0 | 1  | 0  | 0 | 0 | 0 | 0 | 0 | 0 | 38 |
| OTU905 | 0  | 0  | 0 | 0 | 11 | 0 | 1 | 0  | 0 | 0 | 0  | 24 | 0  | 0  | 0 | 0 | 0 | 0  | 0 | 0 | 0 | 0 | 0  | 0  | 0 | 0 | 0 | 0 | 0 | 0 | 36 |
| OTU906 | 0  | 0  | 0 | 0 | 0  | 0 | 0 | 0  | 0 | 0 | 0  | 0  | 0  | 0  | 1 | 0 | 0 | 35 | 0 | 0 | 0 | 0 | 0  | 0  | 0 | 0 | 0 | 0 | 0 | 0 | 36 |
| OTU907 | 0  | 4  | 1 | 0 | 0  | 0 | 5 | 0  | 3 | 0 | 1  | 0  | 0  | 0  | 4 | 2 | 0 | 0  | 0 | 5 | 6 | 0 | 0  | 0  | 0 | 0 | 0 | 0 | 0 | 5 | 36 |
| OTU908 | 16 | 1  | 0 | 1 | 0  | 0 | 0 | 0  | 1 | 3 | 1  | 1  | 3  | 0  | 0 | 0 | 0 | 0  | 1 | 0 | 0 | 0 | 4  | 2  | 0 | 0 | 0 | 0 | 0 | 1 | 35 |
| OTU909 | 0  | 0  | 0 | 0 | 0  | 0 | 0 | 0  | 0 | 0 | 0  | 0  | 1  | 1  | 0 | 0 | 0 | 1  | 4 | 0 | 0 | 0 | 4  | 19 | 0 | 2 | 0 | 0 | 0 | 3 | 35 |
| OTU910 | 0  | 0  | 0 | 0 | 0  | 0 | 0 | 0  | 0 | 0 | 0  | 0  | 0  | 0  | 0 | 0 | 7 | 0  | 4 | 0 | 0 | 0 | 6  | 18 | 0 | 0 | 0 | 0 | 0 | 0 | 35 |
| OTU911 | 0  | 4  | 1 | 2 | 1  | 0 | 7 | 0  | 1 | 5 | 0  | 0  | 1  | 0  | 0 | 0 | 0 | 1  | 0 | 0 | 3 | 4 | 2  | 0  | 0 | 0 | 3 | 0 | 0 | 0 | 35 |
| OTU912 | 0  | 0  | 0 | 0 | 0  | 0 | 0 | 1  | 0 | 0 | 0  | 3  | 3  | 6  | 0 | 0 | 0 | 14 | 8 | 0 | 0 | 0 | 0  | 0  | 0 | 0 | 0 | 0 | 0 | 0 | 35 |
| OTU913 | 3  | 0  | 0 | 0 | 0  | 0 | 2 | 12 | 0 | 7 | 1  | 1  | 6  | 0  | 0 | 0 | 0 | 1  | 0 | 0 | 0 | 1 | 0  | 0  | 1 | 0 | 0 | 0 | 0 | 0 | 35 |
| OTU914 | 2  | 2  | 2 | 0 | 0  | 3 | 0 | 0  | 0 | 5 | 1  | 0  | 1  | 4  | 0 | 0 | 0 | 0  | 0 | 0 | 2 | 0 | 2  | 0  | 0 | 6 | 1 | 0 | 1 | 3 | 35 |
| OTU915 | 6  | 0  | 2 | 4 | 0  | 1 | 0 | 1  | 0 | 2 | 0  | 0  | 0  | 0  | 6 | 0 | 3 | 0  | 1 | 0 | 1 | 2 | 0  | 0  | 0 | 0 | 2 | 2 | 0 | 1 | 34 |
| OTU916 | 0  | 0  | 0 | 0 | 0  | 0 | 0 | 0  | 0 | 0 | 0  | 0  | 0  | 0  | 0 | 0 | 0 | 34 | 0 | 0 | 0 | 0 | 0  | 0  | 0 | 0 | 0 | 0 | 0 | 0 | 34 |
| OTU917 | 10 | 1  | 0 | 1 | 2  | 1 | 0 | 0  | 3 | 4 | 0  | 2  | 1  | 0  | 2 | 0 | 0 | 0  | 0 | 2 | 0 | 0 | 0  | 0  | 0 | 0 | 1 | 3 | 0 | 1 | 34 |
| OTU918 | 0  | 0  | 0 | 0 | 1  | 0 | 0 | 0  | 1 | 0 | 0  | 4  | 0  | 0  | 0 | 0 | 0 | 0  | 1 | 0 | 0 | 0 | 1  | 14 | 1 | 1 | 3 | 0 | 1 | 6 | 34 |
| OTU919 | 0  | 0  | 3 | 0 | 6  | 0 | 0 | 0  | 0 | 5 | 1  | 0  | 0  | 0  | 0 | 0 | 0 | 19 | 0 | 0 | 0 | 0 | 0  | 0  | 0 | 0 | 0 | 0 | 0 | 0 | 34 |
| OTU920 | 0  | 0  | 0 | 0 | 0  | 0 | 0 | 0  | 0 | 2 | 1  | 0  | 7  | 1  | 0 | 0 | 0 | 18 | 0 | 1 | 0 | 2 | 1  | 1  | 0 | 0 | 0 | 0 | 0 | 0 | 34 |
| OTU921 | 0  | 0  | 0 | 0 | 0  | 0 | 1 | 0  | 0 | 0 | 0  | 1  | 0  | 3  | 0 | 0 | 0 | 0  | 0 | 1 | 1 | 0 | 0  | 14 | 5 | 2 | 0 | 0 | 0 | 6 | 34 |
| OTU922 | 0  | 12 | 0 | 0 | 0  | 0 | 3 | 3  | 0 | 0 | 2  | 0  | 13 | 0  | 0 | 0 | 0 | 0  | 0 | 0 | 0 | 0 | 0  | 0  | 0 | 0 | 0 | 0 | 0 | 0 | 33 |
| OTU923 | 5  | 0  | 0 | 4 | 7  | 4 | 0 | 0  | 0 | 0 | 0  | 0  | 0  | 11 | 0 | 0 | 0 | 0  | 0 | 0 | 0 | 0 | 2  | 0  | 0 | 0 | 0 | 0 | 0 | 0 | 33 |
| OTU924 | 2  | 4  | 0 | 5 | 5  | 0 | 0 | 0  | 0 | 0 | 0  | 0  | 0  | 0  | 0 | 0 | 0 | 0  | 0 | 0 | 3 | 0 | 0  | 3  | 0 | 4 | 0 | 2 | 1 | 4 | 33 |
| OTU925 | 9  | 1  | 0 | 1 | 4  | 3 | 0 | 1  | 0 | 0 | 0  | 1  | 0  | 0  | 0 | 0 | 0 | 5  | 1 | 0 | 0 | 0 | 1  | 5  | 0 | 0 | 0 | 0 | 0 | 0 | 32 |

|        |    |   |    |    |   |   |   |   |   |    |   |   |   |    |   |    |   |    |   |   |   |    |   |    |    |    |    |   |   |    |    |
|--------|----|---|----|----|---|---|---|---|---|----|---|---|---|----|---|----|---|----|---|---|---|----|---|----|----|----|----|---|---|----|----|
| OTU926 | 1  | 0 | 1  | 0  | 2 | 0 | 1 | 1 | 0 | 1  | 0 | 2 | 3 | 0  | 1 | 1  | 0 | 0  | 1 | 3 | 1 | 2  | 1 | 0  | 0  | 1  | 1  | 1 | 2 | 5  | 32 |
| OTU927 | 0  | 0 | 0  | 0  | 0 | 0 | 0 | 0 | 0 | 0  | 1 | 0 | 0 | 0  | 0 | 1  | 0 | 28 | 0 | 0 | 0 | 0  | 0 | 0  | 2  | 0  | 0  | 0 | 0 | 0  | 32 |
| OTU928 | 0  | 0 | 0  | 0  | 0 | 0 | 0 | 1 | 0 | 10 | 1 | 0 | 0 | 0  | 0 | 0  | 0 | 19 | 0 | 0 | 0 | 0  | 0 | 1  | 0  | 0  | 0  | 0 | 0 | 0  | 32 |
| OTU929 | 0  | 0 | 0  | 1  | 2 | 2 | 3 | 0 | 1 | 1  | 0 | 0 | 0 | 0  | 2 | 11 | 0 | 1  | 0 | 1 | 0 | 0  | 0 | 0  | 2  | 0  | 1  | 1 | 1 | 2  | 32 |
| OTU930 | 17 | 0 | 0  | 6  | 6 | 0 | 0 | 0 | 0 | 0  | 0 | 0 | 0 | 0  | 0 | 0  | 0 | 0  | 0 | 0 | 0 | 0  | 0 | 0  | 0  | 1  | 0  | 0 | 2 | 0  | 32 |
| OTU931 | 4  | 0 | 0  | 0  | 1 | 0 | 0 | 0 | 0 | 0  | 0 | 1 | 0 | 4  | 0 | 0  | 1 | 0  | 1 | 3 | 3 | 0  | 3 | 3  | 1  | 1  | 6  | 0 | 0 | 0  | 32 |
| OTU932 | 0  | 0 | 0  | 0  | 0 | 0 | 0 | 0 | 0 | 0  | 0 | 0 | 0 | 0  | 0 | 0  | 0 | 0  | 0 | 0 | 0 | 4  | 5 | 0  | 0  | 0  | 19 | 0 | 3 | 1  | 32 |
| OTU933 | 0  | 0 | 22 | 0  | 1 | 3 | 0 | 0 | 0 | 1  | 4 | 0 | 0 | 0  | 0 | 0  | 0 | 0  | 0 | 0 | 0 | 0  | 0 | 0  | 0  | 0  | 0  | 0 | 0 | 0  | 31 |
| OTU934 | 0  | 0 | 0  | 0  | 0 | 0 | 0 | 0 | 0 | 0  | 0 | 0 | 0 | 0  | 0 | 3  | 0 | 27 | 0 | 1 | 0 | 0  | 0 | 0  | 0  | 0  | 0  | 0 | 0 | 0  | 31 |
| OTU935 | 0  | 4 | 0  | 1  | 6 | 0 | 0 | 0 | 0 | 0  | 0 | 1 | 0 | 0  | 0 | 0  | 0 | 1  | 0 | 0 | 1 | 0  | 7 | 0  | 9  | 0  | 0  | 0 | 0 | 1  | 31 |
| OTU936 | 1  | 1 | 0  | 0  | 1 | 0 | 0 | 0 | 0 | 0  | 0 | 0 | 0 | 1  | 0 | 0  | 0 | 0  | 0 | 4 | 0 | 5  | 7 | 0  | 3  | 5  | 0  | 0 | 3 | 31 |    |
| OTU937 | 0  | 0 | 0  | 0  | 1 | 0 | 0 | 0 | 0 | 0  | 0 | 0 | 0 | 0  | 0 | 0  | 0 | 1  | 1 | 0 | 0 | 13 | 1 | 2  | 1  | 2  | 0  | 2 | 7 | 31 |    |
| OTU938 | 0  | 0 | 0  | 0  | 0 | 0 | 0 | 0 | 0 | 0  | 0 | 0 | 0 | 0  | 0 | 0  | 0 | 0  | 0 | 0 | 0 | 0  | 0 | 13 | 1  | 17 | 0  | 0 | 0 | 0  | 31 |
| OTU939 | 0  | 2 | 1  | 2  | 1 | 2 | 0 | 2 | 0 | 0  | 0 | 2 | 1 | 0  | 0 | 2  | 1 | 1  | 2 | 2 | 2 | 0  | 0 | 0  | 0  | 3  | 0  | 1 | 1 | 2  | 30 |
| OTU940 | 0  | 0 | 0  | 11 | 0 | 0 | 2 | 0 | 1 | 0  | 0 | 6 | 5 | 0  | 0 | 0  | 0 | 1  | 0 | 0 | 0 | 0  | 1 | 3  | 0  | 0  | 0  | 0 | 0 | 0  | 30 |
| OTU941 | 0  | 0 | 0  | 0  | 0 | 1 | 0 | 0 | 0 | 0  | 8 | 3 | 0 | 2  | 0 | 0  | 2 | 1  | 0 | 2 | 0 | 0  | 1 | 6  | 2  | 2  | 0  | 0 | 0 | 0  | 30 |
| OTU942 | 0  | 0 | 0  | 0  | 0 | 0 | 0 | 0 | 0 | 0  | 0 | 0 | 0 | 0  | 0 | 0  | 0 | 0  | 0 | 0 | 0 | 0  | 7 | 3  | 0  | 0  | 0  | 0 | 0 | 20 | 30 |
| OTU943 | 0  | 0 | 4  | 0  | 0 | 1 | 0 | 0 | 0 | 1  | 0 | 1 | 1 | 0  | 0 | 2  | 0 | 3  | 1 | 0 | 1 | 5  | 2 | 1  | 1  | 2  | 3  | 1 | 0 | 0  | 30 |
| OTU944 | 0  | 1 | 0  | 0  | 0 | 0 | 0 | 0 | 0 | 0  | 0 | 0 | 0 | 19 | 0 | 0  | 0 | 1  | 0 | 0 | 0 | 3  | 0 | 1  | 3  | 0  | 0  | 0 | 2 | 0  | 30 |
| OTU945 | 11 | 0 | 0  | 0  | 0 | 0 | 0 | 0 | 0 | 6  | 0 | 0 | 0 | 2  | 0 | 0  | 5 | 0  | 0 | 0 | 0 | 2  | 3 | 0  | 0  | 0  | 0  | 0 | 0 | 0  | 29 |
| OTU946 | 0  | 0 | 0  | 0  | 2 | 0 | 4 | 5 | 0 | 12 | 0 | 0 | 0 | 0  | 0 | 0  | 0 | 0  | 0 | 0 | 0 | 0  | 0 | 5  | 0  | 1  | 0  | 0 | 0 | 0  | 29 |
| OTU947 | 0  | 1 | 0  | 0  | 0 | 0 | 0 | 0 | 0 | 0  | 0 | 2 | 0 | 1  | 0 | 0  | 0 | 0  | 0 | 2 | 2 | 1  | 4 | 3  | 1  | 4  | 7  | 1 | 0 | 0  | 29 |
| OTU948 | 0  | 0 | 0  | 0  | 0 | 0 | 0 | 0 | 0 | 0  | 0 | 0 | 0 | 3  | 0 | 0  | 0 | 0  | 0 | 7 | 0 | 0  | 1 | 0  | 18 | 0  | 0  | 0 | 0 | 0  | 29 |
| OTU949 | 0  | 0 | 0  | 0  | 0 | 0 | 0 | 0 | 0 | 0  | 0 | 0 | 0 | 0  | 0 | 0  | 0 | 0  | 2 | 0 | 0 | 17 | 0 | 4  | 0  | 0  | 0  | 4 | 1 | 28 |    |
| OTU950 | 0  | 0 | 0  | 0  | 0 | 0 | 0 | 0 | 0 | 0  | 0 | 0 | 0 | 0  | 0 | 0  | 2 | 0  | 0 | 0 | 0 | 0  | 0 | 26 | 0  | 0  | 0  | 0 | 0 | 0  | 28 |
| OTU951 | 0  | 0 | 0  | 0  | 0 | 1 | 4 | 1 | 0 | 0  | 1 | 2 | 0 | 1  | 0 | 0  | 0 | 1  | 0 | 0 | 0 | 2  | 4 | 3  | 4  | 1  | 1  | 0 | 0 | 2  | 28 |



|        |    |   |   |   |    |   |   |    |   |    |   |   |    |   |   |    |    |    |   |   |   |   |    |    |   |   |   |   |    |    |
|--------|----|---|---|---|----|---|---|----|---|----|---|---|----|---|---|----|----|----|---|---|---|---|----|----|---|---|---|---|----|----|
| OTU952 | 0  | 0 | 0 | 0 | 0  | 0 | 0 | 0  | 0 | 0  | 0 | 0 | 0  | 0 | 0 | 0  | 0  | 0  | 0 | 0 | 0 | 1 | 14 | 13 | 0 | 0 | 0 | 0 | 0  | 28 |
| OTU953 | 0  | 8 | 7 | 0 | 0  | 0 | 0 | 0  | 4 | 0  | 0 | 0 | 4  | 0 | 0 | 0  | 0  | 0  | 0 | 0 | 0 | 0 | 0  | 0  | 4 | 0 | 0 | 0 | 0  | 27 |
| OTU954 | 0  | 0 | 0 | 0 | 1  | 2 | 4 | 0  | 0 | 15 | 1 | 0 | 1  | 0 | 0 | 0  | 0  | 0  | 0 | 0 | 0 | 0 | 3  | 0  | 0 | 0 | 0 | 0 | 0  | 27 |
| OTU955 | 0  | 0 | 0 | 3 | 0  | 0 | 0 | 0  | 0 | 0  | 0 | 1 | 0  | 1 | 0 | 0  | 0  | 0  | 1 | 3 | 5 | 2 | 0  | 2  | 1 | 8 | 0 | 0 | 0  | 27 |
| OTU956 | 0  | 0 | 0 | 0 | 0  | 0 | 0 | 0  | 0 | 0  | 0 | 0 | 0  | 0 | 0 | 0  | 0  | 0  | 0 | 0 | 0 | 0 | 5  | 0  | 0 | 0 | 0 | 0 | 22 | 27 |
| OTU957 | 22 | 2 | 0 | 0 | 0  | 0 | 0 | 0  | 0 | 0  | 0 | 1 | 0  | 1 | 0 | 0  | 0  | 0  | 0 | 0 | 0 | 0 | 0  | 0  | 0 | 0 | 0 | 0 | 1  | 27 |
| OTU958 | 0  | 0 | 0 | 0 | 0  | 0 | 0 | 0  | 0 | 0  | 1 | 0 | 0  | 0 | 0 | 0  | 26 | 0  | 0 | 0 | 0 | 0 | 0  | 0  | 0 | 0 | 0 | 0 | 0  | 27 |
| OTU959 | 5  | 1 | 1 | 0 | 1  | 4 | 0 | 0  | 0 | 2  | 0 | 0 | 0  | 0 | 0 | 0  | 0  | 0  | 0 | 1 | 2 | 0 | 7  | 0  | 0 | 1 | 1 | 0 | 0  | 26 |
| OTU960 | 0  | 0 | 0 | 5 | 0  | 0 | 0 | 13 | 0 | 0  | 0 | 0 | 0  | 0 | 0 | 0  | 0  | 2  | 0 | 0 | 0 | 0 | 0  | 5  | 1 | 0 | 0 | 0 | 0  | 26 |
| OTU961 | 0  | 2 | 2 | 0 | 0  | 0 | 0 | 0  | 0 | 0  | 0 | 0 | 1  | 0 | 2 | 1  | 0  | 5  | 0 | 0 | 2 | 0 | 0  | 2  | 1 | 0 | 5 | 0 | 3  | 26 |
| OTU962 | 0  | 0 | 0 | 0 | 0  | 0 | 0 | 0  | 0 | 0  | 0 | 0 | 0  | 0 | 0 | 0  | 2  | 0  | 0 | 0 | 0 | 1 | 23 | 0  | 0 | 0 | 0 | 0 | 0  | 26 |
| OTU963 | 0  | 0 | 0 | 0 | 0  | 0 | 0 | 0  | 0 | 0  | 0 | 0 | 0  | 0 | 0 | 0  | 0  | 0  | 0 | 0 | 0 | 4 | 10 | 9  | 0 | 0 | 0 | 3 | 0  | 26 |
| OTU964 | 3  | 4 | 4 | 1 | 0  | 1 | 4 | 1  | 0 | 7  | 0 | 0 | 1  | 0 | 0 | 0  | 0  | 0  | 0 | 0 | 0 | 0 | 0  | 0  | 0 | 0 | 0 | 0 | 0  | 26 |
| OTU965 | 0  | 0 | 0 | 0 | 0  | 0 | 0 | 0  | 0 | 0  | 0 | 0 | 0  | 0 | 0 | 0  | 26 | 0  | 0 | 0 | 0 | 0 | 0  | 0  | 0 | 0 | 0 | 0 | 0  | 26 |
| OTU966 | 0  | 0 | 0 | 0 | 0  | 0 | 0 | 0  | 0 | 0  | 0 | 0 | 0  | 0 | 0 | 0  | 0  | 12 | 6 | 0 | 1 | 6 | 0  | 0  | 0 | 0 | 0 | 1 | 0  | 26 |
| OTU967 | 0  | 0 | 2 | 0 | 0  | 0 | 0 | 0  | 0 | 2  | 2 | 2 | 1  | 0 | 1 | 4  | 1  | 2  | 0 | 1 | 3 | 1 | 1  | 0  | 0 | 1 | 1 | 0 | 0  | 25 |
| OTU968 | 0  | 0 | 4 | 0 | 0  | 0 | 2 | 4  | 0 | 0  | 0 | 0 | 0  | 0 | 0 | 0  | 2  | 0  | 0 | 0 | 0 | 0 | 2  | 0  | 0 | 0 | 3 | 0 | 8  | 25 |
| OTU969 | 0  | 3 | 3 | 1 | 0  | 3 | 6 | 2  | 3 | 4  | 0 | 0 | 0  | 0 | 0 | 0  | 0  | 0  | 0 | 0 | 0 | 0 | 0  | 0  | 0 | 0 | 0 | 0 | 0  | 25 |
| OTU970 | 0  | 0 | 0 | 0 | 0  | 0 | 0 | 0  | 0 | 0  | 0 | 0 | 25 | 0 | 0 | 0  | 0  | 0  | 0 | 0 | 0 | 0 | 0  | 0  | 0 | 0 | 0 | 0 | 0  | 25 |
| OTU971 | 0  | 1 | 0 | 0 | 0  | 0 | 0 | 0  | 0 | 1  | 0 | 1 | 0  | 2 | 0 | 0  | 0  | 2  | 0 | 0 | 3 | 3 | 2  | 2  | 1 | 3 | 4 | 0 | 0  | 25 |
| OTU972 | 0  | 0 | 0 | 0 | 0  | 0 | 0 | 0  | 2 | 0  | 0 | 9 | 0  | 6 | 0 | 0  | 0  | 0  | 1 | 0 | 1 | 0 | 3  | 1  | 0 | 1 | 0 | 0 | 1  | 25 |
| OTU973 | 2  | 0 | 0 | 0 | 12 | 0 | 0 | 0  | 0 | 0  | 2 | 0 | 0  | 2 | 0 | 0  | 0  | 0  | 0 | 0 | 0 | 0 | 0  | 0  | 0 | 5 | 0 | 1 | 0  | 24 |
| OTU974 | 0  | 0 | 0 | 4 | 0  | 0 | 5 | 2  | 0 | 3  | 0 | 0 | 0  | 1 | 0 | 0  | 0  | 0  | 0 | 0 | 0 | 0 | 0  | 0  | 1 | 2 | 0 | 6 | 0  | 24 |
| OTU975 | 0  | 5 | 0 | 0 | 2  | 2 | 0 | 0  | 1 | 13 | 0 | 0 | 0  | 0 | 0 | 0  | 0  | 0  | 0 | 0 | 0 | 0 | 0  | 0  | 0 | 1 | 0 | 0 | 0  | 24 |
| OTU976 | 0  | 0 | 0 | 0 | 0  | 3 | 0 | 0  | 0 | 0  | 0 | 0 | 0  | 1 | 9 | 10 | 0  | 0  | 0 | 0 | 0 | 0 | 0  | 0  | 0 | 0 | 1 | 0 | 0  | 24 |
| OTU977 | 0  | 0 | 2 | 0 | 0  | 0 | 0 | 0  | 0 | 0  | 0 | 0 | 0  | 0 | 0 | 0  | 0  | 2  | 0 | 0 | 0 | 0 | 2  | 0  | 0 | 0 | 0 | 3 | 15 | 24 |

|         |   |   |    |   |   |   |   |   |   |   |    |   |   |   |   |   |   |    |   |   |   |   |    |    |   |   |   |   |    |    |    |
|---------|---|---|----|---|---|---|---|---|---|---|----|---|---|---|---|---|---|----|---|---|---|---|----|----|---|---|---|---|----|----|----|
| OTU978  | 0 | 0 | 0  | 0 | 0 | 0 | 0 | 0 | 0 | 0 | 0  | 1 | 0 | 3 | 0 | 0 | 0 | 0  | 2 | 0 | 3 | 6 | 0  | 8  | 0 | 0 | 0 | 0 | 0  | 0  | 23 |
| OTU979  | 1 | 0 | 0  | 0 | 0 | 0 | 0 | 0 | 0 | 0 | 0  | 0 | 0 | 4 | 0 | 0 | 0 | 0  | 2 | 1 | 6 | 0 | 4  | 3  | 0 | 0 | 2 | 0 | 0  | 0  | 23 |
| OTU980  | 0 | 0 | 0  | 0 | 0 | 0 | 0 | 0 | 0 | 0 | 0  | 0 | 0 | 0 | 0 | 0 | 0 | 0  | 0 | 0 | 0 | 0 | 5  | 0  | 2 | 0 | 1 | 2 | 13 | 23 |    |
| OTU981  | 0 | 0 | 0  | 0 | 0 | 0 | 0 | 0 | 0 | 0 | 0  | 0 | 1 | 0 | 0 | 0 | 0 | 0  | 5 | 0 | 2 | 1 | 1  | 0  | 0 | 0 | 0 | 0 | 1  | 12 | 23 |
| OTU982  | 0 | 3 | 0  | 0 | 0 | 0 | 1 | 2 | 7 | 0 | 0  | 1 | 0 | 2 | 0 | 0 | 1 | 0  | 0 | 2 | 1 | 0 | 0  | 0  | 1 | 0 | 0 | 0 | 0  | 2  | 23 |
| OTU983  | 7 | 1 | 9  | 0 | 0 | 2 | 0 | 0 | 0 | 0 | 0  | 0 | 0 | 0 | 1 | 0 | 0 | 0  | 2 | 0 | 0 | 0 | 0  | 0  | 0 | 0 | 0 | 0 | 0  | 0  | 22 |
| OTU984  | 3 | 1 | 12 | 0 | 0 | 1 | 2 | 0 | 0 | 0 | 0  | 0 | 0 | 3 | 0 | 0 | 0 | 0  | 0 | 0 | 0 | 0 | 0  | 0  | 0 | 0 | 0 | 0 | 0  | 0  | 22 |
| OTU985  | 0 | 2 | 0  | 0 | 2 | 1 | 0 | 0 | 0 | 3 | 0  | 4 | 0 | 0 | 0 | 1 | 0 | 3  | 0 | 0 | 0 | 3 | 0  | 1  | 0 | 1 | 0 | 0 | 0  | 1  | 22 |
| OTU986  | 0 | 0 | 0  | 3 | 0 | 0 | 0 | 0 | 1 | 0 | 0  | 0 | 0 | 0 | 0 | 1 | 0 | 0  | 0 | 0 | 0 | 1 | 2  | 5  | 4 | 2 | 3 | 0 | 0  | 0  | 22 |
| OTU987  | 4 | 4 | 0  | 0 | 1 | 1 | 0 | 0 | 0 | 0 | 0  | 1 | 0 | 0 | 0 | 0 | 0 | 0  | 4 | 0 | 2 | 0 | 0  | 4  | 0 | 0 | 0 | 1 | 0  | 22 |    |
| OTU988  | 0 | 0 | 0  | 0 | 0 | 0 | 0 | 0 | 0 | 4 | 0  | 1 | 1 | 0 | 0 | 0 | 0 | 14 | 0 | 0 | 0 | 0 | 0  | 1  | 0 | 0 | 0 | 0 | 0  | 1  | 22 |
| OTU989  | 0 | 0 | 0  | 0 | 1 | 0 | 0 | 0 | 0 | 0 | 0  | 0 | 0 | 0 | 0 | 0 | 0 | 0  | 0 | 0 | 0 | 3 | 1  | 10 | 0 | 1 | 0 | 1 | 1  | 4  | 22 |
| OTU990  | 0 | 3 | 0  | 0 | 0 | 0 | 5 | 0 | 4 | 0 | 0  | 0 | 0 | 0 | 1 | 3 | 0 | 0  | 0 | 3 | 0 | 0 | 0  | 0  | 0 | 0 | 0 | 3 | 0  | 0  | 22 |
| OTU991  | 0 | 0 | 0  | 0 | 0 | 0 | 0 | 0 | 0 | 0 | 19 | 0 | 0 | 0 | 0 | 2 | 0 | 0  | 0 | 0 | 0 | 0 | 0  | 0  | 0 | 0 | 0 | 0 | 0  | 0  | 21 |
| OTU992  | 0 | 0 | 1  | 0 | 2 | 0 | 0 | 0 | 1 | 1 | 0  | 1 | 0 | 0 | 0 | 1 | 0 | 0  | 2 | 0 | 4 | 0 | 5  | 0  | 0 | 1 | 0 | 1 | 1  | 0  | 21 |
| OTU993  | 0 | 0 | 21 | 0 | 0 | 0 | 0 | 0 | 0 | 0 | 0  | 0 | 0 | 0 | 0 | 0 | 0 | 0  | 0 | 0 | 0 | 0 | 0  | 0  | 0 | 0 | 0 | 0 | 0  | 0  | 21 |
| OTU994  | 9 | 3 | 0  | 2 | 1 | 2 | 0 | 0 | 0 | 0 | 0  | 0 | 0 | 0 | 0 | 0 | 0 | 0  | 2 | 0 | 0 | 0 | 0  | 0  | 0 | 2 | 0 | 0 | 0  | 0  | 21 |
| OTU995  | 0 | 0 | 0  | 0 | 0 | 0 | 0 | 0 | 0 | 0 | 0  | 0 | 0 | 0 | 0 | 0 | 0 | 0  | 0 | 0 | 0 | 1 | 0  | 20 | 0 | 0 | 0 | 0 | 0  | 0  | 21 |
| OTU996  | 0 | 0 | 0  | 0 | 0 | 1 | 0 | 0 | 2 | 3 | 0  | 0 | 0 | 3 | 0 | 0 | 0 | 0  | 0 | 1 | 2 | 4 | 2  | 1  | 1 | 0 | 0 | 0 | 0  | 1  | 21 |
| OTU997  | 0 | 0 | 0  | 0 | 0 | 0 | 0 | 1 | 1 | 3 | 2  | 0 | 3 | 0 | 4 | 0 | 0 | 1  | 0 | 0 | 0 | 0 | 1  | 0  | 3 | 1 | 0 | 0 | 0  | 0  | 20 |
| OTU998  | 0 | 1 | 0  | 0 | 2 | 0 | 0 | 0 | 0 | 0 | 0  | 0 | 0 | 7 | 0 | 0 | 0 | 0  | 0 | 0 | 0 | 2 | 0  | 6  | 0 | 0 | 0 | 0 | 2  | 0  | 20 |
| OTU999  | 0 | 0 | 0  | 0 | 0 | 0 | 0 | 0 | 0 | 0 | 0  | 2 | 0 | 0 | 0 | 0 | 0 | 5  | 1 | 0 | 1 | 3 | 3  | 0  | 3 | 2 | 0 | 0 | 0  | 20 |    |
| OTU1000 | 7 | 1 | 0  | 0 | 4 | 0 | 0 | 0 | 0 | 0 | 0  | 0 | 0 | 0 | 0 | 0 | 0 | 1  | 0 | 1 | 1 | 0 | 3  | 0  | 1 | 0 | 0 | 0 | 1  | 20 |    |
| OTU1001 | 0 | 0 | 0  | 0 | 0 | 0 | 0 | 0 | 0 | 0 | 0  | 0 | 0 | 0 | 0 | 0 | 0 | 0  | 0 | 0 | 0 | 0 | 19 | 0  | 0 | 0 | 1 | 0 | 0  | 20 |    |
| OTU1002 | 0 | 0 | 0  | 3 | 0 | 0 | 0 | 0 | 0 | 0 | 0  | 0 | 0 | 3 | 0 | 0 | 0 | 1  | 0 | 0 | 0 | 0 | 2  | 1  | 0 | 0 | 2 | 0 | 0  | 8  | 20 |
| OTU1003 | 0 | 0 | 0  | 6 | 2 | 0 | 0 | 0 | 0 | 0 | 0  | 0 | 0 | 0 | 0 | 0 | 0 | 0  | 0 | 0 | 0 | 1 | 4  | 3  | 0 | 0 | 1 | 0 | 2  | 0  | 19 |



---

|         |   |   |   |   |   |   |   |   |   |   |   |   |   |    |   |   |   |    |   |   |   |    |   |    |   |   |   |   |   |    |    |
|---------|---|---|---|---|---|---|---|---|---|---|---|---|---|----|---|---|---|----|---|---|---|----|---|----|---|---|---|---|---|----|----|
| OTU1030 | 0 | 1 | 0 | 3 | 0 | 0 | 0 | 0 | 0 | 0 | 0 | 0 | 0 | 0  | 0 | 0 | 0 | 1  | 0 | 0 | 0 | 5  | 1 | 1  | 0 | 1 | 2 | 1 | 0 | 0  | 16 |
| OTU1031 | 0 | 0 | 0 | 0 | 0 | 0 | 0 | 0 | 0 | 0 | 0 | 0 | 0 | 0  | 0 | 0 | 0 | 0  | 0 | 0 | 0 | 0  | 0 | 7  | 3 | 6 | 0 | 0 | 0 | 0  | 16 |
| OTU1032 | 2 | 4 | 0 | 0 | 3 | 1 | 0 | 0 | 0 | 4 | 0 | 0 | 0 | 0  | 0 | 0 | 0 | 0  | 0 | 0 | 0 | 0  | 0 | 1  | 0 | 0 | 0 | 0 | 0 | 0  | 15 |
| OTU1033 | 0 | 0 | 1 | 0 | 0 | 0 | 1 | 1 | 0 | 1 | 0 | 1 | 0 | 1  | 2 | 1 | 0 | 0  | 1 | 1 | 0 | 0  | 1 | 0  | 0 | 1 | 1 | 0 | 0 | 1  | 15 |
| OTU1034 | 0 | 0 | 0 | 0 | 0 | 0 | 0 | 0 | 0 | 0 | 0 | 0 | 0 | 0  | 0 | 0 | 0 | 0  | 0 | 0 | 0 | 10 | 5 | 0  | 0 | 0 | 0 | 0 | 0 | 0  | 15 |
| OTU1035 | 0 | 0 | 0 | 0 | 0 | 0 | 0 | 0 | 0 | 0 | 0 | 0 | 0 | 0  | 0 | 0 | 0 | 0  | 0 | 0 | 0 | 0  | 0 | 15 | 0 | 0 | 0 | 0 | 0 | 0  | 15 |
| OTU1036 | 0 | 0 | 0 | 0 | 0 | 0 | 0 | 0 | 0 | 0 | 0 | 3 | 0 | 0  | 0 | 0 | 5 | 0  | 1 | 0 | 0 | 2  | 1 | 0  | 2 | 1 | 0 | 0 | 0 | 0  | 15 |
| OTU1037 | 0 | 9 | 0 | 0 | 0 | 0 | 0 | 0 | 0 | 0 | 0 | 1 | 0 | 0  | 0 | 0 | 0 | 0  | 0 | 0 | 4 | 0  | 0 | 0  | 1 | 0 | 0 | 0 | 0 | 0  | 15 |
| OTU1038 | 2 | 2 | 2 | 0 | 4 | 3 | 0 | 0 | 0 | 0 | 0 | 0 | 0 | 0  | 0 | 0 | 0 | 0  | 0 | 0 | 0 | 0  | 1 | 0  | 0 | 0 | 0 | 1 | 0 | 0  | 15 |
| OTU1039 | 0 | 0 | 1 | 0 | 0 | 0 | 1 | 4 | 0 | 0 | 0 | 0 | 1 | 0  | 0 | 0 | 3 | 0  | 4 | 0 | 0 | 0  | 0 | 1  | 0 | 0 | 0 | 0 | 0 | 0  | 15 |
| OTU1040 | 1 | 1 | 0 | 0 | 0 | 0 | 0 | 2 | 0 | 3 | 1 | 0 | 0 | 0  | 0 | 0 | 0 | 0  | 0 | 0 | 0 | 7  | 0 | 0  | 0 | 0 | 0 | 0 | 0 | 0  | 15 |
| OTU1041 | 0 | 0 | 0 | 0 | 0 | 1 | 2 | 3 | 0 | 5 | 0 | 0 | 0 | 0  | 4 | 0 | 0 | 0  | 0 | 0 | 0 | 0  | 0 | 0  | 0 | 0 | 0 | 0 | 0 | 0  | 15 |
| OTU1042 | 0 | 0 | 0 | 0 | 0 | 0 | 0 | 0 | 0 | 0 | 0 | 1 | 0 | 0  | 0 | 0 | 0 | 14 | 0 | 0 | 0 | 0  | 0 | 0  | 0 | 0 | 0 | 0 | 0 | 0  | 15 |
| OTU1043 | 5 | 0 | 0 | 0 | 2 | 0 | 0 | 0 | 0 | 2 | 0 | 0 | 0 | 0  | 3 | 2 | 0 | 0  | 0 | 0 | 0 | 0  | 0 | 0  | 0 | 0 | 0 | 0 | 0 | 0  | 14 |
| OTU1044 | 0 | 0 | 0 | 0 | 1 | 0 | 0 | 2 | 1 | 0 | 1 | 1 | 0 | 0  | 0 | 1 | 0 | 0  | 1 | 0 | 0 | 1  | 0 | 0  | 1 | 2 | 1 | 0 | 0 | 1  | 14 |
| OTU1045 | 0 | 0 | 0 | 0 | 0 | 0 | 0 | 0 | 0 | 0 | 0 | 0 | 0 | 13 | 0 | 0 | 1 | 0  | 0 | 0 | 0 | 0  | 0 | 0  | 0 | 0 | 0 | 0 | 0 | 0  | 14 |
| OTU1046 | 0 | 0 | 0 | 0 | 0 | 0 | 0 | 0 | 0 | 0 | 0 | 0 | 0 | 0  | 0 | 0 | 0 | 0  | 0 | 0 | 0 | 0  | 2 | 1  | 0 | 0 | 5 | 2 | 0 | 4  | 14 |
| OTU1047 | 6 | 0 | 0 | 6 | 0 | 0 | 0 | 0 | 0 | 0 | 0 | 0 | 0 | 0  | 0 | 0 | 0 | 2  | 0 | 0 | 0 | 0  | 0 | 0  | 0 | 0 | 0 | 0 | 0 | 0  | 14 |
| OTU1048 | 2 | 0 | 0 | 0 | 0 | 3 | 1 | 0 | 0 | 0 | 0 | 0 | 3 | 0  | 0 | 0 | 0 | 3  | 0 | 0 | 1 | 1  | 0 | 0  | 0 | 0 | 0 | 0 | 0 | 0  | 14 |
| OTU1049 | 0 | 0 | 0 | 0 | 0 | 0 | 0 | 0 | 0 | 0 | 0 | 0 | 0 | 6  | 4 | 0 | 0 | 0  | 0 | 0 | 0 | 0  | 1 | 3  | 0 | 0 | 0 | 0 | 0 | 0  | 14 |
| OTU1050 | 1 | 0 | 0 | 0 | 0 | 2 | 0 | 0 | 0 | 1 | 0 | 0 | 0 | 0  | 1 | 0 | 0 | 0  | 0 | 1 | 0 | 3  | 0 | 1  | 0 | 0 | 3 | 0 | 0 | 1  | 14 |
| OTU1051 | 0 | 0 | 0 | 0 | 0 | 0 | 0 | 0 | 0 | 0 | 0 | 0 | 0 | 0  | 0 | 0 | 0 | 0  | 0 | 0 | 0 | 0  | 0 | 14 | 0 | 0 | 0 | 0 | 0 | 0  | 14 |
| OTU1052 | 0 | 0 | 0 | 0 | 0 | 0 | 0 | 0 | 0 | 0 | 0 | 0 | 0 | 6  | 0 | 0 | 0 | 0  | 0 | 3 | 0 | 0  | 1 | 0  | 4 | 0 | 0 | 0 | 0 | 0  | 14 |
| OTU1053 | 0 | 0 | 0 | 0 | 0 | 0 | 0 | 0 | 0 | 0 | 0 | 0 | 0 | 0  | 0 | 0 | 1 | 0  | 1 | 0 | 0 | 0  | 3 | 0  | 8 | 0 | 0 | 0 | 1 | 14 |    |
| OTU1054 | 0 | 0 | 0 | 2 | 0 | 1 | 0 | 2 | 0 | 1 | 0 | 1 | 0 | 0  | 0 | 0 | 0 | 2  | 0 | 0 | 1 | 0  | 0 | 0  | 1 | 1 | 0 | 0 | 1 | 13 |    |
| OTU1055 | 0 | 2 | 1 | 0 | 2 | 2 | 0 | 0 | 0 | 0 | 0 | 0 | 0 | 0  | 0 | 0 | 0 | 1  | 0 | 0 | 0 | 1  | 2 | 2  | 0 | 0 | 0 | 0 | 0 | 0  | 13 |

---



---

|         |    |   |   |   |   |   |   |   |   |   |   |   |   |   |   |   |   |    |   |   |   |   |    |   |   |   |   |   |   |    |    |
|---------|----|---|---|---|---|---|---|---|---|---|---|---|---|---|---|---|---|----|---|---|---|---|----|---|---|---|---|---|---|----|----|
| OTU1082 | 0  | 0 | 0 | 0 | 0 | 0 | 0 | 0 | 0 | 0 | 0 | 0 | 0 | 0 | 0 | 0 | 0 | 2  | 0 | 0 | 1 | 1 | 3  | 4 | 0 | 0 | 0 | 1 | 0 | 0  | 12 |
| OTU1083 | 0  | 1 | 0 | 0 | 0 | 0 | 0 | 0 | 0 | 0 | 0 | 0 | 0 | 0 | 0 | 0 | 0 | 0  | 0 | 0 | 1 | 1 | 0  | 0 | 0 | 0 | 1 | 8 | 0 | 0  | 12 |
| OTU1084 | 7  | 0 | 0 | 1 | 3 | 0 | 0 | 0 | 0 | 0 | 0 | 0 | 0 | 0 | 0 | 0 | 0 | 0  | 0 | 0 | 0 | 0 | 0  | 0 | 0 | 0 | 0 | 0 | 0 | 0  | 11 |
| OTU1085 | 11 | 0 | 0 | 0 | 0 | 0 | 0 | 0 | 0 | 0 | 0 | 0 | 0 | 0 | 0 | 0 | 0 | 0  | 0 | 0 | 0 | 0 | 0  | 0 | 0 | 0 | 0 | 0 | 0 | 0  | 11 |
| OTU1086 | 0  | 0 | 1 | 0 | 1 | 0 | 0 | 0 | 0 | 0 | 2 | 0 | 1 | 0 | 0 | 0 | 1 | 0  | 0 | 0 | 0 | 0 | 1  | 0 | 0 | 0 | 0 | 3 | 1 | 11 |    |
| OTU1087 | 1  | 0 | 0 | 0 | 8 | 0 | 0 | 0 | 2 | 0 | 0 | 0 | 0 | 0 | 0 | 0 | 0 | 0  | 0 | 0 | 0 | 0 | 0  | 0 | 0 | 0 | 0 | 0 | 0 | 0  | 11 |
| OTU1088 | 1  | 0 | 1 | 2 | 0 | 2 | 1 | 0 | 3 | 0 | 0 | 0 | 0 | 0 | 0 | 0 | 0 | 0  | 0 | 0 | 0 | 0 | 1  | 0 | 0 | 0 | 0 | 0 | 0 | 0  | 11 |
| OTU1089 | 0  | 0 | 0 | 0 | 0 | 5 | 0 | 0 | 0 | 1 | 5 | 0 | 0 | 0 | 0 | 0 | 0 | 0  | 0 | 0 | 0 | 0 | 0  | 0 | 0 | 0 | 0 | 0 | 0 | 0  | 11 |
| OTU1090 | 0  | 0 | 4 | 0 | 0 | 0 | 0 | 0 | 1 | 0 | 0 | 0 | 0 | 0 | 0 | 0 | 0 | 0  | 0 | 2 | 0 | 0 | 0  | 0 | 0 | 0 | 0 | 1 | 3 | 11 |    |
| OTU1091 | 0  | 0 | 0 | 0 | 1 | 0 | 0 | 0 | 0 | 0 | 0 | 2 | 0 | 0 | 0 | 0 | 0 | 0  | 0 | 1 | 0 | 1 | 1  | 0 | 0 | 4 | 0 | 0 | 1 | 11 |    |
| OTU1092 | 0  | 0 | 0 | 0 | 0 | 0 | 0 | 0 | 0 | 0 | 0 | 0 | 0 | 0 | 7 | 0 | 0 | 0  | 0 | 2 | 0 | 0 | 2  | 0 | 0 | 0 | 0 | 0 | 0 | 0  | 11 |
| OTU1093 | 0  | 0 | 0 | 0 | 0 | 0 | 0 | 0 | 0 | 6 | 0 | 0 | 2 | 0 | 0 | 1 | 0 | 2  | 0 | 0 | 0 | 0 | 0  | 0 | 0 | 0 | 0 | 0 | 0 | 0  | 11 |
| OTU1094 | 0  | 0 | 0 | 0 | 0 | 0 | 0 | 0 | 0 | 0 | 0 | 0 | 0 | 0 | 0 | 0 | 1 | 0  | 0 | 0 | 0 | 0 | 3  | 2 | 5 | 0 | 0 | 0 | 0 | 0  | 11 |
| OTU1095 | 0  | 0 | 0 | 0 | 0 | 0 | 0 | 0 | 0 | 0 | 0 | 4 | 0 | 2 | 0 | 0 | 0 | 0  | 0 | 2 | 0 | 0 | 1  | 2 | 0 | 0 | 0 | 0 | 0 | 0  | 11 |
| OTU1096 | 1  | 0 | 0 | 0 | 0 | 0 | 0 | 0 | 0 | 0 | 0 | 0 | 0 | 0 | 0 | 0 | 0 | 0  | 0 | 0 | 0 | 0 | 0  | 0 | 0 | 2 | 7 | 0 | 1 | 11 |    |
| OTU1097 | 0  | 0 | 0 | 0 | 0 | 0 | 0 | 0 | 0 | 0 | 0 | 0 | 0 | 0 | 0 | 0 | 0 | 0  | 0 | 5 | 0 | 1 | 1  | 0 | 0 | 0 | 0 | 4 | 0 | 11 |    |
| OTU1098 | 0  | 0 | 0 | 0 | 0 | 0 | 0 | 0 | 0 | 0 | 0 | 0 | 0 | 2 | 0 | 0 | 0 | 0  | 5 | 1 | 0 | 0 | 0  | 0 | 0 | 0 | 0 | 1 | 2 | 11 |    |
| OTU1099 | 3  | 1 | 0 | 0 | 0 | 4 | 0 | 1 | 0 | 0 | 0 | 0 | 1 | 0 | 0 | 0 | 0 | 1  | 0 | 0 | 0 | 0 | 0  | 0 | 0 | 0 | 0 | 0 | 0 | 0  | 11 |
| OTU1100 | 0  | 0 | 0 | 0 | 2 | 0 | 0 | 1 | 0 | 0 | 0 | 0 | 0 | 1 | 0 | 2 | 0 | 0  | 5 | 0 | 0 | 0 | 0  | 0 | 0 | 0 | 0 | 0 | 0 | 0  | 11 |
| OTU1101 | 0  | 1 | 0 | 1 | 0 | 1 | 0 | 0 | 2 | 0 | 0 | 0 | 0 | 0 | 0 | 0 | 0 | 0  | 1 | 0 | 3 | 1 | 1  | 0 | 0 | 0 | 0 | 0 | 0 | 0  | 11 |
| OTU1102 | 0  | 0 | 0 | 0 | 0 | 0 | 0 | 0 | 0 | 0 | 0 | 0 | 0 | 0 | 0 | 0 | 0 | 11 | 0 | 0 | 0 | 0 | 0  | 0 | 0 | 0 | 0 | 0 | 0 | 0  | 11 |
| OTU1103 | 0  | 0 | 0 | 0 | 0 | 0 | 0 | 0 | 0 | 5 | 3 | 0 | 2 | 0 | 0 | 0 | 0 | 0  | 1 | 0 | 0 | 0 | 0  | 0 | 0 | 0 | 0 | 0 | 0 | 0  | 11 |
| OTU1104 | 0  | 0 | 0 | 0 | 0 | 0 | 0 | 0 | 0 | 0 | 0 | 0 | 0 | 0 | 0 | 0 | 0 | 0  | 3 | 0 | 2 | 1 | 2  | 0 | 0 | 2 | 0 | 1 | 0 | 11 |    |
| OTU1105 | 0  | 0 | 0 | 0 | 0 | 0 | 0 | 0 | 1 | 0 | 0 | 0 | 0 | 0 | 0 | 0 | 0 | 0  | 1 | 0 | 0 | 1 | 1  | 0 | 0 | 0 | 5 | 2 | 0 | 11 |    |
| OTU1106 | 0  | 0 | 0 | 0 | 0 | 0 | 0 | 0 | 0 | 0 | 0 | 0 | 0 | 0 | 0 | 0 | 0 | 0  | 0 | 0 | 0 | 0 | 11 | 0 | 0 | 0 | 0 | 0 | 0 | 0  | 11 |
| OTU1107 | 0  | 0 | 0 | 0 | 0 | 0 | 0 | 0 | 0 | 0 | 0 | 0 | 0 | 0 | 0 | 0 | 0 | 0  | 0 | 0 | 0 | 0 | 9  | 1 | 0 | 1 | 0 | 0 | 0 | 0  | 11 |

---







---

|         |   |   |   |   |   |   |   |   |   |   |   |   |   |   |   |   |   |   |   |   |   |   |   |   |   |   |   |   |   |   |
|---------|---|---|---|---|---|---|---|---|---|---|---|---|---|---|---|---|---|---|---|---|---|---|---|---|---|---|---|---|---|---|
| OTU1160 | 3 | 0 | 1 | 0 | 0 | 0 | 0 | 0 | 1 | 0 | 1 | 0 | 0 | 0 | 2 | 0 | 0 | 0 | 0 | 1 | 0 | 0 | 0 | 0 | 0 | 0 | 0 | 0 | 9 |   |
| OTU1161 | 0 | 0 | 0 | 0 | 0 | 0 | 0 | 0 | 7 | 0 | 0 | 0 | 0 | 0 | 0 | 0 | 0 | 2 | 0 | 0 | 0 | 0 | 0 | 0 | 0 | 0 | 0 | 0 | 9 |   |
| OTU1162 | 4 | 0 | 0 | 2 | 0 | 0 | 0 | 1 | 0 | 0 | 0 | 0 | 0 | 0 | 0 | 0 | 0 | 0 | 0 | 0 | 2 | 0 | 0 | 0 | 0 | 0 | 0 | 0 | 9 |   |
| OTU1163 | 0 | 0 | 0 | 0 | 0 | 0 | 0 | 0 | 0 | 0 | 0 | 0 | 0 | 0 | 0 | 0 | 0 | 1 | 0 | 0 | 0 | 0 | 4 | 0 | 0 | 0 | 0 | 4 | 9 |   |
| OTU1164 | 0 | 0 | 0 | 0 | 1 | 0 | 0 | 0 | 0 | 0 | 0 | 0 | 0 | 0 | 0 | 0 | 0 | 0 | 0 | 0 | 0 | 0 | 0 | 0 | 0 | 0 | 0 | 8 | 9 |   |
| OTU1165 | 0 | 0 | 0 | 0 | 0 | 0 | 0 | 0 | 0 | 0 | 0 | 0 | 0 | 0 | 0 | 0 | 0 | 0 | 0 | 0 | 0 | 0 | 0 | 0 | 0 | 0 | 0 | 9 | 9 |   |
| OTU1166 | 0 | 1 | 1 | 0 | 0 | 0 | 1 | 0 | 0 | 3 | 0 | 0 | 0 | 0 | 0 | 0 | 0 | 0 | 0 | 0 | 2 | 0 | 0 | 0 | 0 | 0 | 0 | 0 | 8 |   |
| OTU1167 | 0 | 0 | 8 | 0 | 0 | 0 | 0 | 0 | 0 | 0 | 0 | 0 | 0 | 0 | 0 | 0 | 0 | 0 | 0 | 0 | 0 | 0 | 0 | 0 | 0 | 0 | 0 | 0 | 8 |   |
| OTU1168 | 0 | 0 | 0 | 8 | 0 | 0 | 0 | 0 | 0 | 0 | 0 | 0 | 0 | 0 | 0 | 0 | 0 | 0 | 0 | 0 | 0 | 0 | 0 | 0 | 0 | 0 | 0 | 0 | 8 |   |
| OTU1169 | 0 | 0 | 0 | 0 | 0 | 0 | 0 | 1 | 0 | 7 | 0 | 0 | 0 | 0 | 0 | 0 | 0 | 0 | 0 | 0 | 0 | 0 | 0 | 0 | 0 | 0 | 0 | 0 | 8 |   |
| OTU1170 | 0 | 0 | 0 | 0 | 0 | 0 | 0 | 0 | 0 | 0 | 1 | 0 | 1 | 0 | 0 | 0 | 0 | 0 | 2 | 0 | 3 | 0 | 1 | 0 | 0 | 0 | 0 | 0 | 8 |   |
| OTU1171 | 0 | 0 | 0 | 0 | 0 | 0 | 0 | 0 | 2 | 2 | 0 | 0 | 4 | 0 | 0 | 0 | 0 | 0 | 0 | 0 | 0 | 0 | 0 | 0 | 0 | 0 | 0 | 0 | 8 |   |
| OTU1172 | 0 | 1 | 0 | 0 | 0 | 0 | 0 | 0 | 0 | 0 | 0 | 0 | 0 | 3 | 1 | 0 | 0 | 0 | 0 | 2 | 0 | 0 | 0 | 0 | 0 | 1 | 0 | 0 | 8 |   |
| OTU1173 | 2 | 0 | 0 | 0 | 3 | 0 | 0 | 0 | 0 | 0 | 0 | 0 | 0 | 1 | 0 | 1 | 0 | 0 | 0 | 0 | 0 | 0 | 0 | 0 | 1 | 0 | 0 | 0 | 8 |   |
| OTU1174 | 0 | 0 | 0 | 0 | 0 | 0 | 0 | 0 | 0 | 0 | 0 | 0 | 0 | 0 | 8 | 0 | 0 | 0 | 0 | 0 | 0 | 0 | 0 | 0 | 0 | 0 | 0 | 0 | 8 |   |
| OTU1175 | 0 | 0 | 0 | 0 | 1 | 0 | 0 | 0 | 0 | 1 | 2 | 0 | 0 | 0 | 1 | 0 | 0 | 0 | 3 | 0 | 0 | 0 | 0 | 0 | 0 | 0 | 0 | 0 | 8 |   |
| OTU1176 | 0 | 0 | 0 | 0 | 0 | 0 | 0 | 0 | 0 | 0 | 0 | 0 | 0 | 0 | 0 | 0 | 4 | 0 | 0 | 0 | 0 | 0 | 2 | 0 | 0 | 0 | 0 | 1 | 1 | 8 |
| OTU1177 | 0 | 0 | 0 | 0 | 0 | 0 | 0 | 0 | 0 | 0 | 0 | 0 | 0 | 0 | 0 | 0 | 8 | 0 | 0 | 0 | 0 | 0 | 0 | 0 | 0 | 0 | 0 | 0 | 8 |   |
| OTU1178 | 0 | 0 | 0 | 0 | 0 | 0 | 0 | 0 | 0 | 0 | 0 | 0 | 0 | 0 | 0 | 0 | 2 | 0 | 4 | 0 | 0 | 0 | 0 | 0 | 0 | 0 | 0 | 2 | 8 |   |
| OTU1179 | 0 | 1 | 0 | 0 | 0 | 0 | 0 | 0 | 2 | 0 | 0 | 0 | 0 | 0 | 0 | 2 | 1 | 0 | 0 | 2 | 0 | 0 | 0 | 0 | 0 | 0 | 0 | 0 | 8 |   |
| OTU1180 | 0 | 0 | 0 | 0 | 0 | 0 | 0 | 0 | 0 | 0 | 0 | 0 | 0 | 0 | 0 | 0 | 0 | 0 | 0 | 0 | 0 | 0 | 7 | 0 | 1 | 0 | 0 | 0 | 8 |   |
| OTU1181 | 0 | 0 | 0 | 0 | 0 | 0 | 0 | 0 | 0 | 0 | 0 | 0 | 0 | 0 | 0 | 0 | 5 | 0 | 0 | 0 | 2 | 0 | 1 | 0 | 0 | 0 | 0 | 0 | 8 |   |
| OTU1182 | 0 | 0 | 0 | 0 | 0 | 0 | 0 | 0 | 0 | 0 | 0 | 1 | 0 | 0 | 0 | 0 | 0 | 0 | 0 | 0 | 1 | 0 | 3 | 0 | 0 | 0 | 0 | 3 | 8 |   |
| OTU1183 | 0 | 0 | 0 | 0 | 0 | 0 | 0 | 0 | 0 | 0 | 0 | 0 | 0 | 0 | 0 | 0 | 0 | 0 | 0 | 0 | 0 | 0 | 8 | 0 | 0 | 0 | 0 | 0 | 8 |   |
| OTU1184 | 0 | 0 | 0 | 0 | 0 | 0 | 0 | 0 | 0 | 0 | 0 | 0 | 0 | 0 | 0 | 0 | 0 | 0 | 0 | 0 | 0 | 0 | 0 | 0 | 0 | 8 | 0 | 0 | 8 |   |
| OTU1185 | 0 | 0 | 0 | 0 | 0 | 0 | 0 | 0 | 0 | 0 | 0 | 0 | 0 | 0 | 0 | 0 | 0 | 0 | 1 | 0 | 0 | 4 | 0 | 0 | 1 | 1 | 0 | 1 | 0 | 8 |

---

















---

|         |   |   |   |   |   |   |   |   |   |   |   |   |   |   |   |   |   |   |   |   |   |   |   |   |   |   |   |   |   |   |   |
|---------|---|---|---|---|---|---|---|---|---|---|---|---|---|---|---|---|---|---|---|---|---|---|---|---|---|---|---|---|---|---|---|
| OTU1368 | 1 | 0 | 0 | 0 | 0 | 0 | 0 | 1 | 0 | 0 | 0 | 0 | 0 | 1 | 0 | 0 | 0 | 0 | 0 | 0 | 0 | 2 | 0 | 0 | 0 | 0 | 0 | 0 | 0 | 5 |   |
| OTU1369 | 3 | 0 | 0 | 0 | 0 | 0 | 0 | 0 | 0 | 0 | 0 | 0 | 0 | 1 | 0 | 0 | 0 | 0 | 0 | 0 | 0 | 1 | 0 | 0 | 0 | 0 | 0 | 0 | 0 | 5 |   |
| OTU1370 | 0 | 0 | 0 | 0 | 0 | 0 | 0 | 0 | 0 | 0 | 0 | 0 | 0 | 0 | 0 | 1 | 0 | 0 | 3 | 0 | 1 | 0 | 0 | 0 | 0 | 0 | 0 | 0 | 0 | 5 |   |
| OTU1371 | 0 | 0 | 0 | 0 | 0 | 0 | 0 | 0 | 0 | 0 | 0 | 0 | 0 | 0 | 0 | 0 | 5 | 0 | 0 | 0 | 0 | 0 | 0 | 0 | 0 | 0 | 0 | 0 | 0 | 5 |   |
| OTU1372 | 0 | 0 | 0 | 0 | 0 | 0 | 0 | 0 | 0 | 0 | 0 | 0 | 0 | 0 | 0 | 0 | 5 | 0 | 0 | 0 | 0 | 0 | 0 | 0 | 0 | 0 | 0 | 0 | 0 | 5 |   |
| OTU1373 | 0 | 0 | 0 | 0 | 0 | 0 | 3 | 0 | 0 | 0 | 0 | 0 | 0 | 0 | 0 | 0 | 2 | 0 | 0 | 0 | 0 | 0 | 0 | 0 | 0 | 0 | 0 | 0 | 0 | 5 |   |
| OTU1374 | 0 | 0 | 0 | 0 | 0 | 0 | 0 | 0 | 0 | 0 | 0 | 0 | 0 | 0 | 0 | 0 | 5 | 0 | 0 | 0 | 0 | 0 | 0 | 0 | 0 | 0 | 0 | 0 | 0 | 5 |   |
| OTU1375 | 0 | 0 | 0 | 0 | 0 | 0 | 0 | 0 | 0 | 0 | 0 | 0 | 0 | 0 | 0 | 0 | 3 | 2 | 0 | 0 | 0 | 0 | 0 | 0 | 0 | 0 | 0 | 0 | 0 | 5 |   |
| OTU1376 | 0 | 0 | 0 | 0 | 0 | 0 | 0 | 0 | 0 | 0 | 0 | 0 | 0 | 0 | 0 | 0 | 4 | 1 | 0 | 0 | 0 | 0 | 0 | 0 | 0 | 0 | 0 | 0 | 0 | 5 |   |
| OTU1377 | 0 | 0 | 1 | 0 | 0 | 0 | 0 | 0 | 0 | 3 | 0 | 0 | 0 | 0 | 0 | 0 | 1 | 0 | 0 | 0 | 0 | 0 | 0 | 0 | 0 | 0 | 0 | 0 | 0 | 5 |   |
| OTU1378 | 0 | 0 | 0 | 0 | 0 | 0 | 0 | 0 | 0 | 0 | 0 | 0 | 0 | 0 | 0 | 0 | 0 | 0 | 0 | 4 | 0 | 0 | 0 | 0 | 1 | 0 | 0 | 0 | 0 | 5 |   |
| OTU1379 | 0 | 0 | 0 | 0 | 0 | 0 | 0 | 0 | 0 | 0 | 0 | 0 | 0 | 0 | 0 | 0 | 0 | 0 | 0 | 3 | 0 | 0 | 1 | 0 | 0 | 1 | 0 | 0 | 0 | 5 |   |
| OTU1380 | 0 | 0 | 0 | 0 | 0 | 0 | 0 | 0 | 0 | 0 | 0 | 0 | 0 | 2 | 0 | 0 | 0 | 1 | 0 | 0 | 0 | 0 | 1 | 0 | 0 | 0 | 0 | 0 | 1 | 5 |   |
| OTU1381 | 0 | 0 | 0 | 0 | 0 | 0 | 0 | 0 | 0 | 0 | 0 | 0 | 0 | 0 | 0 | 0 | 0 | 0 | 0 | 0 | 0 | 0 | 4 | 1 | 0 | 0 | 0 | 0 | 0 | 5 |   |
| OTU1382 | 0 | 0 | 0 | 0 | 0 | 0 | 0 | 0 | 0 | 0 | 0 | 0 | 0 | 0 | 0 | 0 | 0 | 0 | 0 | 0 | 0 | 0 | 5 | 0 | 0 | 0 | 0 | 0 | 0 | 5 |   |
| OTU1383 | 0 | 0 | 0 | 0 | 0 | 0 | 0 | 0 | 0 | 0 | 0 | 1 | 0 | 1 | 0 | 0 | 0 | 0 | 0 | 0 | 0 | 0 | 2 | 0 | 0 | 0 | 1 | 0 | 0 | 5 |   |
| OTU1384 | 0 | 0 | 0 | 0 | 0 | 0 | 0 | 0 | 0 | 0 | 0 | 0 | 0 | 0 | 0 | 0 | 0 | 0 | 0 | 0 | 0 | 4 | 0 | 0 | 1 | 0 | 0 | 0 | 0 | 5 |   |
| OTU1385 | 0 | 0 | 0 | 0 | 0 | 0 | 0 | 0 | 0 | 0 | 0 | 0 | 0 | 0 | 0 | 0 | 0 | 1 | 0 | 0 | 0 | 0 | 0 | 0 | 1 | 0 | 0 | 1 | 2 | 5 |   |
| OTU1386 | 0 | 0 | 0 | 0 | 0 | 0 | 0 | 0 | 0 | 0 | 0 | 0 | 0 | 0 | 0 | 0 | 0 | 0 | 0 | 0 | 0 | 0 | 2 | 0 | 0 | 2 | 0 | 1 | 0 | 5 |   |
| OTU1387 | 1 | 0 | 0 | 0 | 0 | 0 | 0 | 0 | 0 | 0 | 0 | 0 | 0 | 0 | 0 | 0 | 0 | 0 | 0 | 2 | 0 | 1 | 0 | 0 | 0 | 1 | 0 | 0 | 0 | 5 |   |
| OTU1388 | 0 | 0 | 0 | 0 | 0 | 0 | 0 | 0 | 0 | 0 | 0 | 0 | 0 | 0 | 0 | 0 | 0 | 0 | 0 | 0 | 0 | 0 | 0 | 0 | 0 | 0 | 1 | 0 | 0 | 4 | 5 |
| OTU1389 | 0 | 0 | 0 | 0 | 0 | 0 | 0 | 0 | 0 | 0 | 0 | 0 | 0 | 0 | 0 | 0 | 0 | 0 | 0 | 0 | 0 | 0 | 0 | 0 | 0 | 0 | 0 | 0 | 0 | 5 | 5 |
| OTU1390 | 0 | 0 | 0 | 0 | 0 | 0 | 0 | 0 | 0 | 0 | 0 | 0 | 0 | 0 | 0 | 0 | 0 | 0 | 0 | 0 | 0 | 0 | 0 | 0 | 0 | 0 | 0 | 1 | 0 | 4 | 5 |
| OTU1391 | 0 | 0 | 0 | 0 | 0 | 0 | 0 | 0 | 0 | 0 | 0 | 0 | 0 | 0 | 0 | 0 | 0 | 0 | 0 | 0 | 0 | 0 | 0 | 0 | 0 | 0 | 0 | 1 | 0 | 2 | 5 |

---

Supplementary Table S3. Information of OTUs annotation.

| OTUs   | Reference<br>sequence | Kindom | Phylum     | Class           | Order       | Family             | Genus                 | E-value | Bitscore | Length | Similarity | Gapopen | Gaps |
|--------|-----------------------|--------|------------|-----------------|-------------|--------------------|-----------------------|---------|----------|--------|------------|---------|------|
| OTU162 | JX014309              | Fungi  | Ascomycota | Dothideomycetes | Capnodiales | Capnodiaceae       | <i>Capnodium</i>      | 2E-84   | 313      | 174    | 98.28      | 1       | 1    |
| OTU277 | JF817339              | Fungi  | Ascomycota | Dothideomycetes | Capnodiales | Capnodiaceae       | <i>Capnodium</i>      | 8E-61   | 234      | 134    | 97.76      | 1       | 1    |
| OTU281 | KM282290              | Fungi  | Ascomycota | Dothideomycetes | Capnodiales | Capnodiaceae       | unidentified          | 4E-82   | 305      | 181    | 97.24      | 2       | 3    |
| OTU463 | KJ463541              | Fungi  | Ascomycota | Dothideomycetes | Capnodiales | Capnodiaceae       | unidentified          | 8E-96   | 351      | 189    | 98.94      | 1       | 1    |
| OTU499 | JF495181              | Fungi  | Ascomycota | Dothideomycetes | Capnodiales | Capnodiaceae       | unidentified          | 5E-56   | 218      | 138    | 95.65      | 1       | 1    |
| OTU152 | GU981736              | Fungi  | Ascomycota | Dothideomycetes | Capnodiales | Capnodiaceae       | unidentified          | 3E-95   | 349      | 215    | 96.74      | 3       | 4    |
| OTU258 | GQ999538              | Fungi  | Ascomycota | Dothideomycetes | Capnodiales | Capnodiaceae       | unidentified          | 2E-106  | 387      | 252    | 95.63      | 4       | 7    |
| OTU508 | LC011422              | Fungi  | Ascomycota | Dothideomycetes | Capnodiales | Cladosporiaceae    | <i>Cladosporium</i>   | 7E-93   | 341      | 184    | 98.91      | 1       | 1    |
| OTU35  | DQ914681              | Fungi  | Ascomycota | Dothideomycetes | Capnodiales | Cladosporiaceae    | <i>Cladosporium</i>   | 6E-53   | 208      | 157    | 92.36      | 1       | 1    |
| OTU320 | KF146177              | Fungi  | Ascomycota | Dothideomycetes | Capnodiales | Cladosporiaceae    | <i>Cladosporium</i>   | 1E-103  | 377      | 198    | 98.99      | 0       | 0    |
| OTU275 | AJ582964              | Fungi  | Ascomycota | Dothideomycetes | Capnodiales | Cladosporiaceae    | <i>Cladosporium</i>   | 6E-100  | 365      | 226    | 96.46      | 3       | 5    |
| OTU542 | FJ757587              | Fungi  | Ascomycota | Dothideomycetes | Capnodiales | Cladosporiaceae    | <i>Cladosporium</i>   | 2E-93   | 343      | 197    | 98.48      | 3       | 3    |
| OTU398 | KM265497              | Fungi  | Ascomycota | Dothideomycetes | Capnodiales | Cladosporiaceae    | <i>Cladosporium</i>   | 2E-64   | 246      | 140    | 98.57      | 2       | 2    |
| OTU446 | KC109759              | Fungi  | Ascomycota | Dothideomycetes | Capnodiales | Cladosporiaceae    | <i>Cladosporium</i>   | 3E-76   | 285      | 163    | 98.16      | 2       | 3    |
| OTU443 | EU035415              | Fungi  | Ascomycota | Dothideomycetes | Capnodiales | Cladosporiaceae    | <i>Cladosporium</i>   | 4E-48   | 192      | 197    | 88.32      | 3       | 7    |
| OTU503 | KJ817302              | Fungi  | Ascomycota | Dothideomycetes | Capnodiales | Cladosporiaceae    | <i>Cladosporium</i>   | 3E-133  | 476      | 252    | 99.21      | 1       | 1    |
| OTU65  | JX014309              | Fungi  | Ascomycota | Dothideomycetes | Capnodiales | Davidiellaceae     | <i>Davidiella</i>     | 3E-92   | 339      | 226    | 95.13      | 3       | 4    |
| OTU361 | EU041803              | Fungi  | Ascomycota | Dothideomycetes | Capnodiales | Dissoconiaceae     | <i>Uwebraunia</i>     | 3E-33   | 143      | 151    | 91.39      | 7       | 8    |
| OTU322 | KM111293              | Fungi  | Ascomycota | Dothideomycetes | Capnodiales | Mycosphaerellaceae | <i>Cercospora</i>     | 7E-96   | 351      | 181    | 99.45      | 0       | 0    |
| OTU76  | KF800162              | Fungi  | Ascomycota | Dothideomycetes | Capnodiales | Mycosphaerellaceae | <i>Mycosphaerella</i> | 5E-122  | 438      | 240    | 98.33      | 1       | 2    |
| OTU254 | DQ530216              | Fungi  | Ascomycota | Dothideomycetes | Capnodiales | Mycosphaerellaceae | <i>Mycosphaerella</i> | 1E-44   | 180      | 147    | 92.52      | 4       | 8    |
| OTU351 | DQ530216              | Fungi  | Ascomycota | Dothideomycetes | Capnodiales | Mycosphaerellaceae | <i>Mycosphaerella</i> | 4E-35   | 149      | 140    | 90.71      | 4       | 7    |
| OTU465 | NR_073218             | Fungi  | Ascomycota | Dothideomycetes | Capnodiales | Mycosphaerellaceae | <i>Mycosphaerella</i> | 2E-51   | 202      | 110    | 98.18      | 0       | 0    |

|        |           |       |            |                 |             |                    |                         |        |     |     |       |   |    |
|--------|-----------|-------|------------|-----------------|-------------|--------------------|-------------------------|--------|-----|-----|-------|---|----|
| OTU317 | HQ625466  | Fungi | Ascomycota | Dothideomycetes | Capnodiales | Mycosphaerellaceae | <i>Mycosphaerella</i>   | 5E-69  | 262 | 172 | 96.51 | 4 | 4  |
| OTU371 | HM992800  | Fungi | Ascomycota | Dothideomycetes | Capnodiales | Mycosphaerellaceae | <i>Mycosphaerella</i>   | 9E-93  | 341 | 227 | 95.59 | 4 | 5  |
| OTU66  | JX875930  | Fungi | Ascomycota | Dothideomycetes | Capnodiales | Mycosphaerellaceae | <i>Mycosphaerella</i>   | 1E-75  | 283 | 143 | 100   | 0 | 0  |
| OTU505 | KM113749  | Fungi | Ascomycota | Dothideomycetes | Capnodiales | Mycosphaerellaceae | <i>Mycosphaerella</i>   | 5E-78  | 291 | 155 | 98.71 | 0 | 0  |
| OTU130 | DQ914681  | Fungi | Ascomycota | Dothideomycetes | Capnodiales | Mycosphaerellaceae | <i>Mycosphaerella</i>   | 1E-57  | 224 | 157 | 93.63 | 1 | 1  |
| OTU184 | GQ203545  | Fungi | Ascomycota | Dothideomycetes | Capnodiales | Mycosphaerellaceae | <i>Mycosphaerella</i>   | 3E-95  | 349 | 204 | 97.06 | 1 | 1  |
| OTU344 | JX998717  | Fungi | Ascomycota | Dothideomycetes | Capnodiales | Mycosphaerellaceae | <i>Mycosphaerella</i>   | 1E-66  | 254 | 151 | 97.35 | 2 | 3  |
| OTU510 | AB255305  | Fungi | Ascomycota | Dothideomycetes | Capnodiales | Mycosphaerellaceae | <i>Mycosphaerella</i>   | 2E-55  | 216 | 125 | 97.6  | 1 | 1  |
| OTU318 | HQ649891  | Fungi | Ascomycota | Dothideomycetes | Capnodiales | Mycosphaerellaceae | <i>Mycosphaerella</i>   | 7E-93  | 341 | 176 | 99.43 | 0 | 0  |
| OTU37  | AY604831  | Fungi | Ascomycota | Dothideomycetes | Capnodiales | Mycosphaerellaceae | <i>Mycosphaerella</i>   | 6E-62  | 238 | 155 | 94.84 | 1 | 2  |
| OTU349 | KM217176  | Fungi | Ascomycota | Dothideomycetes | Capnodiales | Mycosphaerellaceae | <i>Mycosphaerella</i>   | 6E-52  | 204 | 114 | 98.25 | 1 | 2  |
| OTU90  | KF146177  | Fungi | Ascomycota | Dothideomycetes | Capnodiales | Mycosphaerellaceae | <i>Mycosphaerella</i>   | 8E-102 | 371 | 199 | 98.49 | 0 | 0  |
| OTU545 | GU981736  | Fungi | Ascomycota | Dothideomycetes | Capnodiales | Mycosphaerellaceae | <i>Mycosphaerella</i>   | 5E-97  | 355 | 215 | 97.21 | 3 | 3  |
| OTU350 | AF078889  | Fungi | Ascomycota | Dothideomycetes | Capnodiales | Mycosphaerellaceae | <i>Mycosphaerella</i>   | 6E-87  | 321 | 186 | 98.39 | 3 | 3  |
| OTU121 | KC978007  | Fungi | Ascomycota | Dothideomycetes | Capnodiales | Mycosphaerellaceae | <i>Mycosphaerella</i>   | 8E-87  | 321 | 220 | 95.45 | 5 | 7  |
| OTU507 | KP131523  | Fungi | Ascomycota | Dothideomycetes | Capnodiales | Mycosphaerellaceae | <i>Passalora</i>        | 7E-71  | 268 | 151 | 98.01 | 1 | 1  |
| OTU268 | AB998373  | Fungi | Ascomycota | Dothideomycetes | Capnodiales | Mycosphaerellaceae | <i>Passalora</i>        | 3E-89  | 329 | 181 | 98.34 | 1 | 2  |
| OTU129 | GU981736  | Fungi | Ascomycota | Dothideomycetes | Capnodiales | Mycosphaerellaceae | <i>Pseudocercospora</i> | 1E-103 | 377 | 210 | 98.1  | 1 | 1  |
| OTU280 | KJ869117  | Fungi | Ascomycota | Dothideomycetes | Capnodiales | Mycosphaerellaceae | <i>Pseudocercospora</i> | 9E-64  | 244 | 139 | 97.84 | 1 | 1  |
| OTU553 | KM051384  | Fungi | Ascomycota | Dothideomycetes | Capnodiales | Mycosphaerellaceae | <i>Ramichloridium</i>   | 5E-69  | 262 | 168 | 97.02 | 4 | 4  |
| OTU186 | HQ630983  | Fungi | Ascomycota | Dothideomycetes | Capnodiales | Mycosphaerellaceae | <i>Ramichloridium</i>   | 3E-57  | 222 | 143 | 96.5  | 3 | 4  |
| OTU261 | KC485065  | Fungi | Ascomycota | Dothideomycetes | Capnodiales | Mycosphaerellaceae | <i>Ramichloridium</i>   | 1E-57  | 224 | 179 | 92.18 | 4 | 10 |
| OTU435 | KC305358  | Fungi | Ascomycota | Dothideomycetes | Capnodiales | Mycosphaerellaceae | <i>Ramichloridium</i>   | 9E-55  | 214 | 163 | 94.48 | 5 | 6  |
| OTU82  | HM992800  | Fungi | Ascomycota | Dothideomycetes | Capnodiales | Mycosphaerellaceae | <i>Ramichloridium</i>   | 2E-118 | 426 | 223 | 99.1  | 0 | 0  |
| OTU492 | FJ627262  | Fungi | Ascomycota | Dothideomycetes | Capnodiales | Mycosphaerellaceae | <i>Ramichloridium</i>   | 2E-68  | 260 | 209 | 91.87 | 4 | 10 |
| OTU326 | UDB019589 | Fungi | Ascomycota | Dothideomycetes | Capnodiales | Mycosphaerellaceae | <i>Ramichloridium</i>   | 8E-121 | 434 | 243 | 98.77 | 3 | 3  |

---

|        |          |       |            |                 |             |                    |                       |        |     |     |       |   |    |
|--------|----------|-------|------------|-----------------|-------------|--------------------|-----------------------|--------|-----|-----|-------|---|----|
| OTU299 | HM992800 | Fungi | Ascomycota | Dothideomycetes | Capnodiales | Mycosphaerellaceae | <i>Ramichloridium</i> | 9E-93  | 341 | 227 | 95.15 | 3 | 4  |
| OTU138 | FJ820729 | Fungi | Ascomycota | Dothideomycetes | Capnodiales | Mycosphaerellaceae | <i>Ramichloridium</i> | 3E-64  | 246 | 166 | 95.18 | 3 | 5  |
| OTU543 | GQ999538 | Fungi | Ascomycota | Dothideomycetes | Capnodiales | Mycosphaerellaceae | <i>Septoria</i>       | 7E-38  | 159 | 80  | 100   | 0 | 0  |
| OTU478 | KM051384 | Fungi | Ascomycota | Dothideomycetes | Capnodiales | Mycosphaerellaceae | unidentified          | 2E-74  | 280 | 153 | 98.69 | 1 | 1  |
| OTU255 | EU035415 | Fungi | Ascomycota | Dothideomycetes | Capnodiales | Mycosphaerellaceae | unidentified          | 1E-38  | 161 | 201 | 88.06 | 7 | 11 |
| OTU303 | AJ582964 | Fungi | Ascomycota | Dothideomycetes | Capnodiales | Mycosphaerellaceae | unidentified          | 3E-111 | 402 | 223 | 97.76 | 0 | 0  |
| OTU257 | KF286985 | Fungi | Ascomycota | Dothideomycetes | Capnodiales | Mycosphaerellaceae | unidentified          | 3E-30  | 133 | 127 | 91.34 | 4 | 4  |
| OTU535 | DQ530216 | Fungi | Ascomycota | Dothideomycetes | Capnodiales | Mycosphaerellaceae | unidentified          | 1E-35  | 151 | 128 | 92.19 | 3 | 3  |
| OTU462 | KJ186791 | Fungi | Ascomycota | Dothideomycetes | Capnodiales | Teratosphaeriaceae | <i>Devriesia</i>      | 3E-73  | 276 | 139 | 100   | 0 | 0  |
| OTU428 | KP131662 | Fungi | Ascomycota | Dothideomycetes | Capnodiales | Teratosphaeriaceae | <i>Devriesia</i>      | 4E-69  | 262 | 140 | 99.29 | 1 | 1  |
| OTU413 | AB769904 | Fungi | Ascomycota | Dothideomycetes | Capnodiales | Teratosphaeriaceae | unidentified          | 3E-92  | 339 | 236 | 94.49 | 4 | 7  |
| OTU749 | KC438382 | Fungi | Ascomycota | Dothideomycetes | Capnodiales | Teratosphaeriaceae | unidentified          | 1E-65  | 250 | 141 | 97.87 | 1 | 2  |
| OTU431 | GU981736 | Fungi | Ascomycota | Dothideomycetes | Capnodiales | Teratosphaeriaceae | unidentified          | 2E-90  | 333 | 217 | 95.85 | 4 | 7  |
| OTU502 | KC857282 | Fungi | Ascomycota | Dothideomycetes | Capnodiales | Teratosphaeriaceae | unidentified          | 4E-63  | 242 | 155 | 95.48 | 2 | 5  |
| OTU518 | FJ791130 | Fungi | Ascomycota | Dothideomycetes | Capnodiales | Teratosphaeriaceae | unidentified          | 7E-93  | 341 | 180 | 99.44 | 1 | 1  |
| OTU549 | KC978007 | Fungi | Ascomycota | Dothideomycetes | Capnodiales | Teratosphaeriaceae | unidentified          | 3E-83  | 309 | 220 | 93.64 | 2 | 2  |
| OTU208 | AB255241 | Fungi | Ascomycota | Dothideomycetes | Capnodiales | Trichomeriaceae    | <i>Trichomerium</i>   | 6E-62  | 238 | 136 | 97.79 | 1 | 1  |
| OTU114 | KC354795 | Fungi | Ascomycota | Dothideomycetes | Capnodiales | Trichomeriaceae    | <i>Trichomerium</i>   | 1E-56  | 220 | 155 | 94.19 | 2 | 2  |
| OTU166 | JF819170 | Fungi | Ascomycota | Dothideomycetes | Capnodiales | Trichomeriaceae    | <i>Trichomerium</i>   | 1E-59  | 230 | 156 | 94.23 | 1 | 1  |
| OTU282 | AB507841 | Fungi | Ascomycota | Dothideomycetes | Capnodiales | Trichomeriaceae    | <i>Trichomerium</i>   | 2E-38  | 161 | 117 | 94.87 | 3 | 3  |
| OTU298 | FJ778154 | Fungi | Ascomycota | Dothideomycetes | Capnodiales | Trichomeriaceae    | <i>Trichomerium</i>   | 4E-66  | 252 | 159 | 96.86 | 3 | 3  |
| OTU321 | KJ881377 | Fungi | Ascomycota | Dothideomycetes | Capnodiales | Trichomeriaceae    | <i>Trichomerium</i>   | 7E-90  | 331 | 189 | 97.35 | 1 | 3  |
| OTU11  | JX014309 | Fungi | Ascomycota | Dothideomycetes | Capnodiales | Trichomeriaceae    | <i>Trichomerium</i>   | 8E-121 | 434 | 223 | 99.55 | 0 | 0  |
| OTU80  | KM246756 | Fungi | Ascomycota | Dothideomycetes | Capnodiales | Trichomeriaceae    | <i>Trichomerium</i>   | 6E-81  | 301 | 176 | 96.59 | 0 | 0  |
| OTU110 | JX998717 | Fungi | Ascomycota | Dothideomycetes | Capnodiales | Trichomeriaceae    | <i>Trichomerium</i>   | 5E-56  | 218 | 152 | 95.39 | 4 | 6  |
| OTU133 | JQ825256 | Fungi | Ascomycota | Dothideomycetes | Capnodiales | Trichomeriaceae    | <i>Trichomerium</i>   | 2E-51  | 202 | 110 | 99.09 | 1 | 1  |

---

---

|        |           |       |            |                 |             |                 |                     |       |     |     |       |   |   |
|--------|-----------|-------|------------|-----------------|-------------|-----------------|---------------------|-------|-----|-----|-------|---|---|
| OTU30  | FJ757039  | Fungi | Ascomycota | Dothideomycetes | Capnodiales | Trichomeriaceae | <i>Trichomerium</i> | 2E-86 | 319 | 161 | 100   | 0 | 0 |
| OTU33  | NR_073231 | Fungi | Ascomycota | Dothideomycetes | Capnodiales | Trichomeriaceae | <i>Trichomerium</i> | 6E-49 | 194 | 114 | 97.37 | 1 | 1 |
| OTU159 | KM527126  | Fungi | Ascomycota | Dothideomycetes | Capnodiales | Trichomeriaceae | <i>Trichomerium</i> | 6E-65 | 248 | 147 | 97.28 | 2 | 4 |
| OTU400 | AB615578  | Fungi | Ascomycota | Dothideomycetes | Capnodiales | Trichomeriaceae | <i>Trichomerium</i> | 7E-36 | 151 | 76  | 100   | 0 | 0 |
| OTU63  | KM246756  | Fungi | Ascomycota | Dothideomycetes | Capnodiales | Trichomeriaceae | <i>Trichomerium</i> | 1E-75 | 283 | 179 | 97.21 | 4 | 4 |
| OTU117 | KF286985  | Fungi | Ascomycota | Dothideomycetes | Capnodiales | Trichomeriaceae | <i>Trichomerium</i> | 5E-47 | 188 | 151 | 92.72 | 3 | 3 |
| OTU287 | JF749183  | Fungi | Ascomycota | Dothideomycetes | Capnodiales | Trichomeriaceae | <i>Trichomerium</i> | 1E-20 | 101 | 97  | 88.66 | 1 | 3 |
| OTU434 | JX268526  | Fungi | Ascomycota | Dothideomycetes | Capnodiales | Trichomeriaceae | <i>Trichomerium</i> | 1E-53 | 210 | 126 | 96.83 | 1 | 1 |
| OTU544 | GQ999538  | Fungi | Ascomycota | Dothideomycetes | Capnodiales | Trichomeriaceae | <i>Trichomerium</i> | 1E-45 | 184 | 101 | 98.02 | 0 | 0 |
| OTU188 | AB922855  | Fungi | Ascomycota | Dothideomycetes | Capnodiales | Trichomeriaceae | <i>Trichomerium</i> | 6E-49 | 194 | 110 | 98.18 | 1 | 1 |
| OTU219 | JQ905732  | Fungi | Ascomycota | Dothideomycetes | Capnodiales | Trichomeriaceae | <i>Trichomerium</i> | 1E-56 | 220 | 135 | 97.04 | 2 | 2 |
| OTU267 | AB507841  | Fungi | Ascomycota | Dothideomycetes | Capnodiales | Trichomeriaceae | <i>Trichomerium</i> | 8E-41 | 168 | 109 | 95.41 | 1 | 1 |
| OTU331 | JF817339  | Fungi | Ascomycota | Dothideomycetes | Capnodiales | Trichomeriaceae | <i>Trichomerium</i> | 8E-58 | 224 | 137 | 97.08 | 2 | 2 |
| OTU61  | JF945390  | Fungi | Ascomycota | Dothideomycetes | Capnodiales | Trichomeriaceae | <i>Trichomerium</i> | 7E-49 | 194 | 133 | 95.49 | 3 | 4 |
| OTU98  | KC857282  | Fungi | Ascomycota | Dothideomycetes | Capnodiales | Trichomeriaceae | <i>Trichomerium</i> | 7E-74 | 278 | 152 | 98.03 | 0 | 0 |
| OTU96  | GQ999538  | Fungi | Ascomycota | Dothideomycetes | Capnodiales | Trichomeriaceae | <i>Trichomerium</i> | 3E-43 | 176 | 105 | 97.14 | 1 | 1 |
| OTU263 | AB998515  | Fungi | Ascomycota | Dothideomycetes | Capnodiales | Trichomeriaceae | <i>Trichomerium</i> | 7E-58 | 224 | 124 | 98.39 | 1 | 2 |
| OTU295 | KJ775453  | Fungi | Ascomycota | Dothideomycetes | Capnodiales | Trichomeriaceae | <i>Trichomerium</i> | 5E-78 | 291 | 155 | 98.71 | 0 | 0 |
| OTU54  | JX966555  | Fungi | Ascomycota | Dothideomycetes | Capnodiales | Trichomeriaceae | <i>Trichomerium</i> | 2E-74 | 280 | 199 | 93.97 | 3 | 5 |
| OTU218 | GQ999538  | Fungi | Ascomycota | Dothideomycetes | Capnodiales | Trichomeriaceae | <i>Trichomerium</i> | 7E-38 | 159 | 80  | 100   | 0 | 0 |
| OTU269 | AM712269  | Fungi | Ascomycota | Dothideomycetes | Capnodiales | unidentified    | unidentified        | 4E-92 | 339 | 235 | 94.89 | 4 | 4 |
| OTU429 | U65613    | Fungi | Ascomycota | Dothideomycetes | Capnodiales | unidentified    | unidentified        | 8E-55 | 214 | 145 | 94.48 | 2 | 5 |
| OTU472 | HM484701  | Fungi | Ascomycota | Dothideomycetes | Capnodiales | unidentified    | unidentified        | 8E-83 | 307 | 155 | 100   | 0 | 0 |
| OTU556 | Z81427    | Fungi | Ascomycota | Dothideomycetes | Capnodiales | unidentified    | unidentified        | 6E-31 | 135 | 124 | 89.52 | 1 | 1 |
| OTU363 | FJ820729  | Fungi | Ascomycota | Dothideomycetes | Capnodiales | unidentified    | unidentified        | 8E-43 | 174 | 170 | 91.76 | 7 | 9 |
| OTU224 | AM901803  | Fungi | Ascomycota | Dothideomycetes | Capnodiales | unidentified    | unidentified        | 8E-55 | 214 | 148 | 95.27 | 3 | 3 |

---

|        |           |       |            |                 |              |                    |                         |        |     |     |       |   |   |
|--------|-----------|-------|------------|-----------------|--------------|--------------------|-------------------------|--------|-----|-----|-------|---|---|
| OTU210 | KM100712  | Fungi | Ascomycota | Dothideomycetes | Capnodiales  | unidentified       | unidentified            | 4E-85  | 315 | 191 | 97.38 | 3 | 3 |
| OTU375 | KF901810  | Fungi | Ascomycota | Dothideomycetes | Dothideales  | Sacrotheciaceae    | <i>Aureobasidium</i>    | 5E-47  | 188 | 151 | 92.72 | 3 | 3 |
| OTU89  | FJ770078  | Fungi | Ascomycota | Dothideomycetes | Dothideales  | Sacrotheciaceae    | <i>Aureobasidium</i>    | 3E-23  | 109 | 142 | 88.03 | 5 | 6 |
| OTU470 | FJ778154  | Fungi | Ascomycota | Dothideomycetes | Incertae     | Eremomycetaceae    | <i>Arthrographis</i>    | 4E-60  | 232 | 164 | 95.12 | 4 | 5 |
| OTU83  | GU981736  | Fungi | Ascomycota | Dothideomycetes | Incertae     | Incertae           | <i>Zymoseptoria</i>     | 1E-91  | 337 | 214 | 96.73 | 4 | 4 |
| OTU506 | KM527126  | Fungi | Ascomycota | Dothideomycetes | Incertae     | Incertae           | <i>Zymoseptoria</i>     | 3E-70  | 266 | 142 | 99.3  | 1 | 1 |
| OTU139 | JF817339  | Fungi | Ascomycota | Dothideomycetes | Incertae     | Incertae           | <i>Zymoseptoria</i>     | 2E-67  | 256 | 133 | 99.25 | 0 | 0 |
| OTU460 | KC193597  | Fungi | Ascomycota | Dothideomycetes | Incertae     | Incertae           | <i>Zymoseptoria</i>     | 6E-49  | 194 | 110 | 98.18 | 1 | 1 |
| OTU496 | FJ820729  | Fungi | Ascomycota | Dothideomycetes | Incertae     | Incertae           | <i>Zymoseptoria</i>     | 1E-50  | 200 | 168 | 92.86 | 5 | 6 |
| OTU447 | KC491368  | Fungi | Ascomycota | Dothideomycetes | Incertae     | Incertae           | <i>Zymoseptoria</i>     | 1E-113 | 410 | 242 | 96.69 | 1 | 2 |
| OTU360 | AY254161  | Fungi | Ascomycota | Dothideomycetes | Myriangiales | Myriangiaceae      | <i>Myriangium</i>       | 4E-23  | 109 | 103 | 90.29 | 2 | 2 |
| OTU103 | KM527126  | Fungi | Ascomycota | Dothideomycetes | Myriangiales | Myriangiaceae      | <i>Myriangium</i>       | 1E-62  | 240 | 145 | 97.24 | 2 | 2 |
| OTU441 | U65613    | Fungi | Ascomycota | Dothideomycetes | Myriangiales | Myriangiaceae      | <i>Myriangium</i>       | 6E-65  | 248 | 141 | 97.16 | 0 | 0 |
| OTU201 | GQ999538  | Fungi | Ascomycota | Dothideomycetes | Pleosporales | Coniothyriaceae    | <i>Coniothyrium</i>     | 5E-42  | 172 | 107 | 97.2  | 2 | 2 |
| OTU751 | KC857282  | Fungi | Ascomycota | Dothideomycetes | Pleosporales | Cucurbitariaceae   | <i>Pyrenochaetopsis</i> | 2E-58  | 226 | 159 | 94.97 | 4 | 7 |
| OTU204 | KM225886  | Fungi | Ascomycota | Dothideomycetes | Pleosporales | Cucurbitariaceae   | <i>Pyrenochaetopsis</i> | 1E-107 | 391 | 225 | 98.22 | 3 | 3 |
| OTU259 | JX014309  | Fungi | Ascomycota | Dothideomycetes | Pleosporales | Didymellaceae      | <i>Didymella</i>        | 1E-97  | 357 | 228 | 96.49 | 4 | 4 |
| OTU356 | KF146177  | Fungi | Ascomycota | Dothideomycetes | Pleosporales | Didymellaceae      | <i>Didymella</i>        | 5E-103 | 375 | 197 | 98.98 | 0 | 0 |
| OTU306 | GQ999538  | Fungi | Ascomycota | Dothideomycetes | Pleosporales | Didymellaceae      | <i>Didymella</i>        | 1E-119 | 430 | 249 | 97.59 | 2 | 2 |
| OTU581 | NR_073218 | Fungi | Ascomycota | Dothideomycetes | Pleosporales | Didymellaceae      | <i>Leptosphaerulina</i> | 8E-39  | 161 | 105 | 94.29 | 0 | 0 |
| OTU562 | DQ825984  | Fungi | Ascomycota | Dothideomycetes | Pleosporales | Didymosphaeriaceae | <i>Didymosphaeria</i>   | 2E-43  | 176 | 124 | 94.35 | 2 | 3 |
| OTU16  | KC354795  | Fungi | Ascomycota | Dothideomycetes | Pleosporales | Didymosphaeriaceae | <i>Didymosphaeria</i>   | 1E-59  | 230 | 152 | 94.74 | 1 | 1 |
| OTU42  | FJ757768  | Fungi | Ascomycota | Dothideomycetes | Pleosporales | Didymosphaeriaceae | <i>Didymosphaeria</i>   | 3E-82  | 305 | 166 | 98.8  | 1 | 1 |
| OTU18  | KM246232  | Fungi | Ascomycota | Dothideomycetes | Pleosporales | Didymosphaeriaceae | <i>Didymosphaeria</i>   | 4E-44  | 178 | 122 | 95.08 | 2 | 2 |
| OTU452 | KM520128  | Fungi | Ascomycota | Dothideomycetes | Pleosporales | Incertae           | <i>Phoma</i>            | 7E-87  | 321 | 209 | 96.65 | 5 | 6 |
| OTU783 | HM487014  | Fungi | Ascomycota | Dothideomycetes | Pleosporales | Incertae           | <i>Phoma</i>            | 2E-37  | 157 | 145 | 92.41 | 6 | 8 |

---

|        |          |       |            |                 |              |                   |                           |       |     |     |       |   |   |
|--------|----------|-------|------------|-----------------|--------------|-------------------|---------------------------|-------|-----|-----|-------|---|---|
| OTU367 | KC485065 | Fungi | Ascomycota | Dothideomycetes | Pleosporales | Lentitheciaceae   | <i>Keissleriella</i>      | 9E-83 | 307 | 171 | 98.83 | 2 | 2 |
| OTU523 | JQ692165 | Fungi | Ascomycota | Dothideomycetes | Pleosporales | Leptosphaeriaceae | <i>Leptosphaeria</i>      | 8E-87 | 321 | 178 | 98.88 | 2 | 2 |
| OTU164 | GU053830 | Fungi | Ascomycota | Dothideomycetes | Pleosporales | Leptosphaeriaceae | <i>Leptosphaeria</i>      | 2E-50 | 200 | 204 | 89.71 | 5 | 6 |
| OTU466 | AJ875349 | Fungi | Ascomycota | Dothideomycetes | Pleosporales | Leptosphaeriaceae | <i>Leptosphaeria</i>      | 4E-69 | 262 | 140 | 98.57 | 0 | 0 |
| OTU271 | FJ917556 | Fungi | Ascomycota | Dothideomycetes | Pleosporales | Leptosphaeriaceae | <i>Leptosphaeria</i>      | 4E-85 | 315 | 194 | 96.91 | 3 | 4 |
| OTU414 | AB998515 | Fungi | Ascomycota | Dothideomycetes | Pleosporales | Leptosphaeriaceae | <i>Leptosphaeria</i>      | 1E-59 | 230 | 124 | 98.39 | 0 | 0 |
| OTU461 | KC857282 | Fungi | Ascomycota | Dothideomycetes | Pleosporales | Leptosphaeriaceae | <i>Leptosphaeria</i>      | 2E-71 | 270 | 152 | 97.37 | 0 | 0 |
| OTU113 | FJ627262 | Fungi | Ascomycota | Dothideomycetes | Pleosporales | Leptosphaeriaceae | <i>Leptosphaeria</i>      | 4E-79 | 295 | 205 | 96.1  | 6 | 6 |
| OTU155 | KJ188708 | Fungi | Ascomycota | Dothideomycetes | Pleosporales | Leptosphaeriaceae | <i>Leptosphaeria</i>      | 9E-64 | 244 | 139 | 97.12 | 0 | 0 |
| OTU217 | KJ572145 | Fungi | Ascomycota | Dothideomycetes | Pleosporales | Lophiostomataceae | <i>Lophiostoma</i>        | 9E-64 | 244 | 149 | 95.97 | 1 | 3 |
| OTU387 | KM051384 | Fungi | Ascomycota | Dothideomycetes | Pleosporales | Lophiostomataceae | <i>Lophiostoma</i>        | 2E-77 | 289 | 162 | 98.15 | 1 | 1 |
| OTU213 | HQ631046 | Fungi | Ascomycota | Dothideomycetes | Pleosporales | Massarinaceae     | <i>Massarina</i>          | 3E-50 | 198 | 108 | 98.15 | 0 | 0 |
| OTU347 | KJ525663 | Fungi | Ascomycota | Dothideomycetes | Pleosporales | Montagnulaceae    | <i>Paraconiothyrium</i>   | 2E-71 | 270 | 144 | 99.31 | 1 | 1 |
| OTU316 | GU936114 | Fungi | Ascomycota | Dothideomycetes | Pleosporales | Montagnulaceae    | <i>Paraconiothyrium</i>   | 6E-84 | 311 | 181 | 98.34 | 3 | 3 |
| OTU232 | GU721442 | Fungi | Ascomycota | Dothideomycetes | Pleosporales | Montagnulaceae    | <i>Paraconiothyrium</i>   | 7E-71 | 268 | 155 | 96.77 | 0 | 0 |
| OTU491 | DQ914681 | Fungi | Ascomycota | Dothideomycetes | Pleosporales | Montagnulaceae    | <i>Paraconiothyrium</i>   | 2E-43 | 176 | 169 | 89.94 | 3 | 3 |
| OTU339 | KM051384 | Fungi | Ascomycota | Dothideomycetes | Pleosporales | Phaeosphaeriaceae | <i>Ophiosphaerella</i>    | 3E-55 | 216 | 153 | 96.08 | 5 | 5 |
| OTU112 | EF504325 | Fungi | Ascomycota | Dothideomycetes | Pleosporales | Phaeosphaeriaceae | <i>Phaeosphaeria</i>      | 9E-51 | 200 | 109 | 98.17 | 0 | 0 |
| OTU274 | AB255241 | Fungi | Ascomycota | Dothideomycetes | Pleosporales | Phaeosphaeriaceae | <i>Phaeosphaeria</i>      | 2E-55 | 216 | 149 | 95.97 | 4 | 4 |
| OTU225 | HE584827 | Fungi | Ascomycota | Dothideomycetes | Pleosporales | Phaeosphaeriaceae | <i>Phaeosphaeria</i>      | 3E-21 | 103 | 60  | 96.67 | 0 | 0 |
| OTU329 | EU035415 | Fungi | Ascomycota | Dothideomycetes | Pleosporales | Phaeosphaeriaceae | <i>Phaeosphaeria</i>      | 3E-58 | 226 | 194 | 91.24 | 4 | 8 |
| OTU405 | JX967403 | Fungi | Ascomycota | Dothideomycetes | Pleosporales | Phaeosphaeriaceae | <i>Phaeosphaeriopsis</i>  | 1E-38 | 161 | 157 | 89.81 | 4 | 8 |
| OTU134 | JX535092 | Fungi | Ascomycota | Dothideomycetes | Pleosporales | Phaeosphaeriaceae | <i>Phaeosphaeriopsis</i>  | 2E-21 | 103 | 72  | 94.44 | 1 | 1 |
| OTU445 | GQ511957 | Fungi | Ascomycota | Dothideomycetes | Pleosporales | Phaeosphaeriaceae | <i>Phaeosphaeriopsis</i>  | 5E-44 | 178 | 166 | 90.96 | 4 | 4 |
| OTU353 | DQ530216 | Fungi | Ascomycota | Dothideomycetes | Pleosporales | Phaeosphaeriaceae | <i>Sclerostagonospora</i> | 2E-24 | 113 | 145 | 89.66 | 7 | 7 |
| OTU764 | AB255262 | Fungi | Ascomycota | Dothideomycetes | Pleosporales | Phaeosphaeriaceae | <i>Stagonospora</i>       | 7E-74 | 278 | 152 | 98.68 | 1 | 1 |

---

---

|        |          |       |            |                 |              |               |                   |        |     |     |       |   |    |
|--------|----------|-------|------------|-----------------|--------------|---------------|-------------------|--------|-----|-----|-------|---|----|
| OTU716 | KC978007 | Fungi | Ascomycota | Dothideomycetes | Pleosporales | Pleosporaceae | <i>Alternaria</i> | 3E-74  | 280 | 149 | 99.33 | 1 | 1  |
| OTU780 | FJ781312 | Fungi | Ascomycota | Dothideomycetes | Pleosporales | Pleosporaceae | <i>Alternaria</i> | 1E-66  | 254 | 163 | 96.32 | 3 | 4  |
| OTU715 | KC753419 | Fungi | Ascomycota | Dothideomycetes | Pleosporales | Pleosporaceae | <i>Alternaria</i> | 1E-38  | 161 | 147 | 91.16 | 4 | 6  |
| OTU386 | KJ780809 | Fungi | Ascomycota | Dothideomycetes | Pleosporales | Pleosporaceae | <i>Bipolaris</i>  | 1E-72  | 274 | 154 | 98.05 | 1 | 1  |
| OTU722 | KM215637 | Fungi | Ascomycota | Dothideomycetes | Pleosporales | Pleosporaceae | <i>Epicoccum</i>  | 1E-53  | 210 | 161 | 95.03 | 6 | 7  |
| OTU307 | JF945390 | Fungi | Ascomycota | Dothideomycetes | Pleosporales | Pleosporaceae | <i>Epicoccum</i>  | 2E-55  | 216 | 133 | 97.74 | 3 | 3  |
| OTU283 | FJ627262 | Fungi | Ascomycota | Dothideomycetes | Pleosporales | Shiraiaceae   | <i>Shiraia</i>    | 4E-88  | 325 | 200 | 95.5  | 0 | 0  |
| OTU157 | AF314984 | Fungi | Ascomycota | Dothideomycetes | Pleosporales | Shiraiaceae   | <i>Shiraia</i>    | 1E-85  | 317 | 187 | 96.79 | 1 | 2  |
| OTU1   | AB255241 | Fungi | Ascomycota | Dothideomycetes | Pleosporales | Shiraiaceae   | <i>Shiraia</i>    | 2E-61  | 236 | 147 | 96.6  | 2 | 2  |
| OTU74  | KM246756 | Fungi | Ascomycota | Dothideomycetes | Pleosporales | Shiraiaceae   | <i>Shiraia</i>    | 2E-77  | 289 | 174 | 97.13 | 2 | 2  |
| OTU199 | KJ677255 | Fungi | Ascomycota | Dothideomycetes | Pleosporales | Shiraiaceae   | <i>Shiraia</i>    | 2E-77  | 289 | 154 | 98.7  | 0 | 0  |
| OTU40  | KM023784 | Fungi | Ascomycota | Dothideomycetes | Pleosporales | Shiraiaceae   | <i>Shiraia</i>    | 6E-71  | 268 | 147 | 97.96 | 0 | 0  |
| OTU20  | KM246232 | Fungi | Ascomycota | Dothideomycetes | Pleosporales | Shiraiaceae   | <i>Shiraia</i>    | 1E-44  | 180 | 123 | 95.12 | 2 | 2  |
| OTU266 | KM923758 | Fungi | Ascomycota | Dothideomycetes | Pleosporales | Shiraiaceae   | <i>Shiraia</i>    | 4E-66  | 252 | 147 | 97.96 | 2 | 2  |
| OTU313 | AB998271 | Fungi | Ascomycota | Dothideomycetes | Pleosporales | Shiraiaceae   | <i>Shiraia</i>    | 4E-88  | 325 | 180 | 98.33 | 1 | 1  |
| OTU75  | AJ875349 | Fungi | Ascomycota | Dothideomycetes | Pleosporales | Shiraiaceae   | <i>Shiraia</i>    | 2E-68  | 260 | 147 | 97.96 | 1 | 1  |
| OTU181 | KF901501 | Fungi | Ascomycota | Dothideomycetes | Pleosporales | Shiraiaceae   | <i>Shiraia</i>    | 2E-65  | 250 | 150 | 97.33 | 2 | 2  |
| OTU451 | KM232438 | Fungi | Ascomycota | Dothideomycetes | Pleosporales | Shiraiaceae   | <i>Shiraia</i>    | 2E-74  | 280 | 157 | 98.73 | 2 | 2  |
| OTU24  | GQ999538 | Fungi | Ascomycota | Dothideomycetes | Pleosporales | Shiraiaceae   | <i>Shiraia</i>    | 5E-51  | 202 | 106 | 99.06 | 0 | 0  |
| OTU403 | HM992800 | Fungi | Ascomycota | Dothideomycetes | Pleosporales | Shiraiaceae   | <i>Shiraia</i>    | 4E-107 | 389 | 227 | 96.92 | 1 | 2  |
| OTU193 | JX524287 | Fungi | Ascomycota | Dothideomycetes | Pleosporales | Shiraiaceae   | <i>Shiraia</i>    | 4E-63  | 242 | 158 | 95.57 | 2 | 2  |
| OTU170 | EU035415 | Fungi | Ascomycota | Dothideomycetes | Pleosporales | Shiraiaceae   | <i>Shiraia</i>    | 2E-53  | 210 | 201 | 90.05 | 5 | 10 |
| OTU58  | GQ999538 | Fungi | Ascomycota | Dothideomycetes | Pleosporales | Shiraiaceae   | <i>Shiraia</i>    | 4E-39  | 163 | 105 | 96.19 | 2 | 3  |
| OTU148 | KM246756 | Fungi | Ascomycota | Dothideomycetes | Pleosporales | Shiraiaceae   | <i>Shiraia</i>    | 2E-80  | 299 | 179 | 97.21 | 2 | 2  |
| OTU408 | KM232438 | Fungi | Ascomycota | Dothideomycetes | Pleosporales | Shiraiaceae   | <i>Shiraia</i>    | 3E-70  | 266 | 161 | 97.52 | 3 | 4  |
| OTU55  | JQ009310 | Fungi | Ascomycota | Dothideomycetes | Pleosporales | Shiraiaceae   | <i>Shiraia</i>    | 3E-33  | 143 | 88  | 95.45 | 0 | 0  |

---



|        |           |       |            |                 |              |               |                 |        |     |     |       |   |   |
|--------|-----------|-------|------------|-----------------|--------------|---------------|-----------------|--------|-----|-----|-------|---|---|
| OTU88  | KM265911  | Fungi | Ascomycota | Dothideomycetes | Pleosporales | Shiraiaceae   | <i>Shiraia</i>  | 4E-94  | 345 | 182 | 99.45 | 1 | 1 |
| OTU479 | KM052900  | Fungi | Ascomycota | Dothideomycetes | Pleosporales | Shiraiaceae   | <i>Shiraia</i>  | 2E-64  | 246 | 148 | 96.62 | 1 | 1 |
| OTU140 | DQ914681  | Fungi | Ascomycota | Dothideomycetes | Pleosporales | Shiraiaceae   | <i>Shiraia</i>  | 3E-45  | 182 | 170 | 90.59 | 4 | 6 |
| OTU528 | KC491368  | Fungi | Ascomycota | Dothideomycetes | Pleosporales | Shiraiaceae   | <i>Shiraia</i>  | 1E-33  | 145 | 176 | 86.93 | 3 | 4 |
| OTU548 | KC857282  | Fungi | Ascomycota | Dothideomycetes | Pleosporales | Shiraiaceae   | <i>Shiraia</i>  | 9E-61  | 234 | 149 | 95.3  | 1 | 2 |
| OTU526 | JX556228  | Fungi | Ascomycota | Dothideomycetes | Pleosporales | Sporormiaceae | <i>Preussia</i> | 2E-77  | 289 | 162 | 98.77 | 2 | 2 |
| OTU454 | NR_073231 | Fungi | Ascomycota | Dothideomycetes | Pleosporales | Sporormiaceae | <i>Preussia</i> | 1E-56  | 220 | 111 | 100   | 0 | 0 |
| OTU288 | JX998699  | Fungi | Ascomycota | Dothideomycetes | Pleosporales | unidentified  | unidentified    | 8E-58  | 224 | 145 | 95.17 | 1 | 1 |
| OTU246 | FJ627262  | Fungi | Ascomycota | Dothideomycetes | Pleosporales | unidentified  | unidentified    | 3E-95  | 349 | 200 | 98    | 2 | 2 |
| OTU554 | KP132479  | Fungi | Ascomycota | Dothideomycetes | Pleosporales | unidentified  | unidentified    | 5E-75  | 281 | 166 | 96.39 | 0 | 0 |
| OTU262 | KM051384  | Fungi | Ascomycota | Dothideomycetes | Pleosporales | unidentified  | unidentified    | 4E-66  | 252 | 167 | 96.41 | 4 | 4 |
| OTU345 | JX998717  | Fungi | Ascomycota | Dothideomycetes | Pleosporales | unidentified  | unidentified    | 6E-68  | 258 | 146 | 97.95 | 1 | 1 |
| OTU412 | AB036065  | Fungi | Ascomycota | Dothideomycetes | Pleosporales | unidentified  | unidentified    | 6E-71  | 268 | 143 | 98.6  | 0 | 0 |
| OTU146 | JX268524  | Fungi | Ascomycota | Dothideomycetes | Pleosporales | unidentified  | unidentified    | 7E-68  | 258 | 162 | 96.3  | 2 | 2 |
| OTU292 | GU981606  | Fungi | Ascomycota | Dothideomycetes | Pleosporales | unidentified  | unidentified    | 6E-90  | 331 | 175 | 99.43 | 1 | 1 |
| OTU13  | FJ770078  | Fungi | Ascomycota | Dothideomycetes | Pleosporales | unidentified  | unidentified    | 6E-28  | 125 | 139 | 88.49 | 3 | 3 |
| OTU97  | JF694932  | Fungi | Ascomycota | Dothideomycetes | Pleosporales | unidentified  | unidentified    | 1E-59  | 230 | 154 | 95.45 | 3 | 5 |
| OTU333 | JX984735  | Fungi | Ascomycota | Dothideomycetes | Pleosporales | unidentified  | unidentified    | 6E-62  | 238 | 148 | 96.62 | 2 | 2 |
| OTU10  | FJ820729  | Fungi | Ascomycota | Dothideomycetes | Pleosporales | unidentified  | unidentified    | 7E-65  | 248 | 165 | 95.76 | 3 | 3 |
| OTU237 | GQ999534  | Fungi | Ascomycota | Dothideomycetes | Pleosporales | unidentified  | unidentified    | 6E-65  | 248 | 152 | 96.71 | 2 | 3 |
| OTU365 | JN904871  | Fungi | Ascomycota | Dothideomycetes | Pleosporales | unidentified  | unidentified    | 6E-21  | 101 | 71  | 94.37 | 1 | 1 |
| OTU106 | HQ696058  | Fungi | Ascomycota | Dothideomycetes | Pleosporales | unidentified  | unidentified    | 1E-59  | 230 | 148 | 97.3  | 4 | 4 |
| OTU362 | FJ025287  | Fungi | Ascomycota | Dothideomycetes | Pleosporales | unidentified  | unidentified    | 1E-78  | 293 | 152 | 99.34 | 0 | 0 |
| OTU123 | GQ999538  | Fungi | Ascomycota | Dothideomycetes | Pleosporales | unidentified  | unidentified    | 1E-48  | 194 | 106 | 99.06 | 1 | 1 |
| OTU439 | KM272006  | Fungi | Ascomycota | Dothideomycetes | unidentified | unidentified  | unidentified    | 9E-130 | 464 | 242 | 99.17 | 0 | 0 |
| OTU740 | GU214635  | Fungi | Ascomycota | Dothideomycetes | Venturiales  | Venturiaceae  | unidentified    | 1E-29  | 131 | 137 | 89.78 | 4 | 5 |

---

|        |          |       |            |                 |                 |                     |                      |        |      |     |       |   |    |
|--------|----------|-------|------------|-----------------|-----------------|---------------------|----------------------|--------|------|-----|-------|---|----|
| OTU290 | AY737765 | Fungi | Ascomycota | Dothideomycetes | Venturiales     | Venturiaceae        | <i>Xenomeris</i>     | 1E-100 | 367  | 201 | 98.51 | 1 | 1  |
| OTU573 | JX436317 | Fungi | Ascomycota | Eurotiomycetes  | Chaetothyriales | Chaetothyriaceae    | <i>Camptophora</i>   | 2E-55  | 216  | 169 | 94.08 | 5 | 5  |
| OTU122 | KM052887 | Fungi | Ascomycota | Eurotiomycetes  | Chaetothyriales | Cyphellophoraceae   | <i>Cyphellophora</i> | 2E-64  | 246  | 151 | 96.69 | 2 | 3  |
| OTU291 | GQ999538 | Fungi | Ascomycota | Eurotiomycetes  | Chaetothyriales | Cyphellophoraceae   | <i>Cyphellophora</i> | 9E-53  | 208  | 105 | 100   | 0 | 0  |
| OTU385 | KF156293 | Fungi | Ascomycota | Eurotiomycetes  | Chaetothyriales | Cyphellophoraceae   | <i>Cyphellophora</i> | 1E-50  | 200  | 148 | 95.27 | 5 | 6  |
| OTU236 | EU035415 | Fungi | Ascomycota | Eurotiomycetes  | Chaetothyriales | Cyphellophoraceae   | <i>Cyphellophora</i> | 6E-44  | 178  | 202 | 89.6  | 8 | 12 |
| OTU424 | KC965494 | Fungi | Ascomycota | Eurotiomycetes  | Chaetothyriales | Cyphellophoraceae   | <i>Cyphellophora</i> | 3E-20  | 99.6 | 50  | 100   | 0 | 0  |
| OTU120 | FJ798594 | Fungi | Ascomycota | Eurotiomycetes  | Chaetothyriales | Cyphellophoraceae   | <i>Cyphellophora</i> | 7E-74  | 278  | 144 | 99.31 | 0 | 0  |
| OTU175 | DQ914681 | Fungi | Ascomycota | Eurotiomycetes  | Chaetothyriales | Cyphellophoraceae   | <i>Cyphellophora</i> | 2E-62  | 240  | 172 | 93.6  | 2 | 3  |
| OTU392 | HE584827 | Fungi | Ascomycota | Eurotiomycetes  | Chaetothyriales | Cyphellophoraceae   | <i>Cyphellophora</i> | 8E-25  | 115  | 176 | 86.36 | 6 | 8  |
| OTU406 | KF435574 | Fungi | Ascomycota | Eurotiomycetes  | Chaetothyriales | Cyphellophoraceae   | <i>Cyphellophora</i> | 4E-66  | 252  | 155 | 97.42 | 3 | 3  |
| OTU511 | AB980801 | Fungi | Ascomycota | Eurotiomycetes  | Chaetothyriales | Cyphellophoraceae   | unidentified         | 8E-74  | 278  | 176 | 96.59 | 3 | 3  |
| OTU473 | HM992800 | Fungi | Ascomycota | Eurotiomycetes  | Chaetothyriales | Cyphellophoraceae   | unidentified         | 3E-83  | 309  | 233 | 93.56 | 5 | 8  |
| OTU185 | JX014309 | Fungi | Ascomycota | Eurotiomycetes  | Chaetothyriales | Cyphellophoraceae   | unidentified         | 1E-101 | 371  | 227 | 96.48 | 2 | 2  |
| OTU309 | JX998699 | Fungi | Ascomycota | Eurotiomycetes  | Chaetothyriales | Cyphellophoraceae   | unidentified         | 1E-53  | 210  | 142 | 95.07 | 2 | 2  |
| OTU376 | Z81427   | Fungi | Ascomycota | Eurotiomycetes  | Chaetothyriales | Cyphellophoraceae   | unidentified         | 4E-26  | 119  | 96  | 91.67 | 1 | 1  |
| OTU391 | AY598859 | Fungi | Ascomycota | Eurotiomycetes  | Chaetothyriales | Cyphellophoraceae   | unidentified         | 4E-44  | 178  | 122 | 93.44 | 0 | 0  |
| OTU171 | FJ820729 | Fungi | Ascomycota | Eurotiomycetes  | Chaetothyriales | Cyphellophoraceae   | unidentified         | 2E-46  | 186  | 106 | 98.11 | 1 | 1  |
| OTU512 | DQ530216 | Fungi | Ascomycota | Eurotiomycetes  | Chaetothyriales | Cyphellophoraceae   | unidentified         | 6E-59  | 228  | 135 | 97.04 | 1 | 1  |
| OTU310 | KF222008 | Fungi | Ascomycota | Eurotiomycetes  | Chaetothyriales | Herpotrichiellaceae | <i>Phialophora</i>   | 2E-24  | 113  | 93  | 92.47 | 2 | 2  |
| OTU173 | FJ438386 | Fungi | Ascomycota | Eurotiomycetes  | Chaetothyriales | Herpotrichiellaceae | <i>Phialophora</i>   | 3E-98  | 359  | 217 | 97.7  | 4 | 4  |
| OTU487 | AB520352 | Fungi | Ascomycota | Eurotiomycetes  | Chaetothyriales | Herpotrichiellaceae | <i>Phialophora</i>   | 2E-58  | 226  | 118 | 99.15 | 0 | 0  |
| OTU520 | FJ820729 | Fungi | Ascomycota | Eurotiomycetes  | Chaetothyriales | Herpotrichiellaceae | <i>Phialophora</i>   | 4E-60  | 232  | 153 | 96.08 | 3 | 3  |
| OTU64  | DQ682585 | Fungi | Ascomycota | Eurotiomycetes  | Chaetothyriales | Herpotrichiellaceae | <i>Phialophora</i>   | 1E-56  | 220  | 130 | 97.69 | 2 | 3  |
| OTU109 | HQ631017 | Fungi | Ascomycota | Eurotiomycetes  | Chaetothyriales | Herpotrichiellaceae | <i>Phialophora</i>   | 2E-49  | 196  | 139 | 94.96 | 3 | 3  |
| OTU380 | EU686935 | Fungi | Ascomycota | Eurotiomycetes  | Chaetothyriales | Herpotrichiellaceae | <i>Phialophora</i>   | 3E-20  | 99.6 | 94  | 89.36 | 1 | 1  |

---

---

|        |          |       |            |                |                 |                     |                     |        |      |     |       |   |   |
|--------|----------|-------|------------|----------------|-----------------|---------------------|---------------------|--------|------|-----|-------|---|---|
| OTU125 | DQ680687 | Fungi | Ascomycota | Eurotiomycetes | Chaetothyriales | Herpotrichiellaceae | <i>Phialophora</i>  | 1E-94  | 347  | 175 | 100   | 0 | 0 |
| OTU92  | FJ757040 | Fungi | Ascomycota | Eurotiomycetes | Chaetothyriales | Herpotrichiellaceae | <i>Phialophora</i>  | 8E-64  | 244  | 135 | 97.78 | 0 | 0 |
| OTU39  | JX014309 | Fungi | Ascomycota | Eurotiomycetes | Chaetothyriales | Herpotrichiellaceae | <i>Phialophora</i>  | 7E-112 | 404  | 220 | 99.09 | 2 | 2 |
| OTU102 | KM246186 | Fungi | Ascomycota | Eurotiomycetes | Chaetothyriales | Herpotrichiellaceae | <i>Phialophora</i>  | 5E-62  | 238  | 120 | 100   | 0 | 0 |
| OTU197 | JQ009310 | Fungi | Ascomycota | Eurotiomycetes | Chaetothyriales | Incertae            | <i>Strelitziana</i> | 1E-35  | 151  | 88  | 96.59 | 0 | 0 |
| OTU44  | JX624261 | Fungi | Ascomycota | Eurotiomycetes | Chaetothyriales | Incertae            | <i>Strelitziana</i> | 2E-71  | 270  | 148 | 98.65 | 1 | 1 |
| OTU100 | DQ914681 | Fungi | Ascomycota | Eurotiomycetes | Chaetothyriales | Incertae            | <i>Strelitziana</i> | 6E-47  | 188  | 171 | 91.23 | 4 | 4 |
| OTU229 | KM527126 | Fungi | Ascomycota | Eurotiomycetes | Chaetothyriales | Incertae            | <i>Strelitziana</i> | 5E-59  | 228  | 143 | 95.8  | 1 | 1 |
| OTU209 | FJ798594 | Fungi | Ascomycota | Eurotiomycetes | Chaetothyriales | unidentified        | unidentified        | 6E-65  | 248  | 149 | 97.32 | 2 | 2 |
| OTU384 | KF143800 | Fungi | Ascomycota | Eurotiomycetes | Chaetothyriales | unidentified        | unidentified        | 5E-59  | 228  | 139 | 97.12 | 2 | 2 |
| OTU433 | JN904871 | Fungi | Ascomycota | Eurotiomycetes | Chaetothyriales | unidentified        | unidentified        | 2E-20  | 99.6 | 74  | 93.24 | 1 | 1 |
| OTU67  | EU686935 | Fungi | Ascomycota | Eurotiomycetes | Chaetothyriales | unidentified        | unidentified        | 3E-20  | 99.6 | 94  | 89.36 | 1 | 1 |
| OTU558 | AF444483 | Fungi | Ascomycota | Eurotiomycetes | Chaetothyriales | unidentified        | unidentified        | 4E-25  | 115  | 74  | 95.95 | 1 | 1 |
| OTU86  | KF435574 | Fungi | Ascomycota | Eurotiomycetes | Chaetothyriales | unidentified        | unidentified        | 7E-74  | 278  | 152 | 98.03 | 0 | 0 |
| OTU187 | KM063247 | Fungi | Ascomycota | Eurotiomycetes | Chaetothyriales | unidentified        | unidentified        | 2E-71  | 270  | 144 | 99.31 | 1 | 1 |
| OTU48  | GU981734 | Fungi | Ascomycota | Eurotiomycetes | Chaetothyriales | unidentified        | unidentified        | 2E-102 | 373  | 216 | 98.15 | 3 | 3 |
| OTU396 | KF435574 | Fungi | Ascomycota | Eurotiomycetes | Chaetothyriales | unidentified        | unidentified        | 7E-74  | 278  | 152 | 98.03 | 0 | 0 |
| OTU432 | HE584882 | Fungi | Ascomycota | Eurotiomycetes | Chaetothyriales | unidentified        | unidentified        | 2E-46  | 186  | 132 | 93.94 | 2 | 4 |
| OTU17  | EU686935 | Fungi | Ascomycota | Eurotiomycetes | Chaetothyriales | unidentified        | unidentified        | 1E-22  | 107  | 94  | 90.43 | 1 | 1 |
| OTU49  | HQ696058 | Fungi | Ascomycota | Eurotiomycetes | Chaetothyriales | unidentified        | unidentified        | 3E-60  | 232  | 145 | 97.24 | 3 | 3 |
| OTU41  | GU461502 | Fungi | Ascomycota | Eurotiomycetes | Chaetothyriales | unidentified        | unidentified        | 2E-33  | 143  | 124 | 89.52 | 1 | 5 |
| OTU163 | EF694652 | Fungi | Ascomycota | Eurotiomycetes | Chaetothyriales | unidentified        | unidentified        | 1E-75  | 283  | 155 | 98.71 | 1 | 1 |
| OTU305 | EF504325 | Fungi | Ascomycota | Eurotiomycetes | Chaetothyriales | unidentified        | unidentified        | 9E-54  | 210  | 106 | 100   | 0 | 0 |
| OTU200 | AF444483 | Fungi | Ascomycota | Eurotiomycetes | Chaetothyriales | unidentified        | unidentified        | 2E-20  | 99.6 | 74  | 93.24 | 1 | 1 |
| OTU359 | AB255305 | Fungi | Ascomycota | Eurotiomycetes | Chaetothyriales | unidentified        | unidentified        | 8E-52  | 204  | 130 | 96.15 | 2 | 3 |
| OTU527 | JX998714 | Fungi | Ascomycota | Eurotiomycetes | Chaetothyriales | unidentified        | unidentified        | 4E-29  | 129  | 81  | 95.06 | 0 | 0 |

---

---

|        |           |       |            |                |                 |              |              |        |     |     |       |   |   |
|--------|-----------|-------|------------|----------------|-----------------|--------------|--------------|--------|-----|-----|-------|---|---|
| OTU567 | HE584882  | Fungi | Ascomycota | Eurotiomycetes | Chaetothyriales | unidentified | unidentified | 7E-43  | 174 | 141 | 92.2  | 3 | 6 |
| OTU169 | HQ731642  | Fungi | Ascomycota | Eurotiomycetes | Chaetothyriales | unidentified | unidentified | 4E-69  | 262 | 148 | 97.97 | 1 | 1 |
| OTU346 | KF296406  | Fungi | Ascomycota | Eurotiomycetes | Chaetothyriales | unidentified | unidentified | 6E-90  | 331 | 175 | 99.43 | 1 | 1 |
| OTU69  | KF735008  | Fungi | Ascomycota | Eurotiomycetes | Chaetothyriales | unidentified | unidentified | 2E-64  | 246 | 144 | 97.22 | 1 | 1 |
| OTU145 | HF558655  | Fungi | Ascomycota | Eurotiomycetes | Chaetothyriales | unidentified | unidentified | 4E-88  | 325 | 164 | 100   | 0 | 0 |
| OTU477 | KF313112  | Fungi | Ascomycota | Eurotiomycetes | Chaetothyriales | unidentified | unidentified | 4E-85  | 315 | 206 | 95.63 | 3 | 4 |
| OTU486 | U65613    | Fungi | Ascomycota | Eurotiomycetes | Chaetothyriales | unidentified | unidentified | 3E-54  | 212 | 145 | 95.17 | 3 | 5 |
| OTU223 | KJ608106  | Fungi | Ascomycota | Eurotiomycetes | Chaetothyriales | unidentified | unidentified | 3E-60  | 232 | 121 | 99.17 | 0 | 0 |
| OTU221 | GQ518230  | Fungi | Ascomycota | Eurotiomycetes | Chaetothyriales | unidentified | unidentified | 3E-32  | 139 | 122 | 90.98 | 2 | 2 |
| OTU6   | GQ999538  | Fungi | Ascomycota | Eurotiomycetes | Chaetothyriales | unidentified | unidentified | 5E-42  | 172 | 99  | 97.98 | 1 | 1 |
| OTU377 | AB693792  | Fungi | Ascomycota | Eurotiomycetes | Chaetothyriales | unidentified | unidentified | 1E-62  | 240 | 137 | 97.81 | 1 | 1 |
| OTU409 | NR_073337 | Fungi | Ascomycota | Eurotiomycetes | Chaetothyriales | unidentified | unidentified | 1E-25  | 117 | 101 | 91.09 | 2 | 4 |
| OTU273 | KM205065  | Fungi | Ascomycota | Eurotiomycetes | Chaetothyriales | unidentified | unidentified | 2E-68  | 260 | 163 | 96.32 | 2 | 2 |
| OTU514 | DQ682585  | Fungi | Ascomycota | Eurotiomycetes | Chaetothyriales | unidentified | unidentified | 1E-56  | 220 | 130 | 97.69 | 2 | 3 |
| OTU68  | KM051384  | Fungi | Ascomycota | Eurotiomycetes | Chaetothyriales | unidentified | unidentified | 2E-74  | 280 | 165 | 96.97 | 1 | 1 |
| OTU265 | KM246756  | Fungi | Ascomycota | Eurotiomycetes | Chaetothyriales | unidentified | unidentified | 9E-83  | 307 | 179 | 97.77 | 2 | 2 |
| OTU285 | HM992800  | Fungi | Ascomycota | Eurotiomycetes | Chaetothyriales | unidentified | unidentified | 3E-83  | 309 | 230 | 93.91 | 5 | 7 |
| OTU94  | KF146177  | Fungi | Ascomycota | Eurotiomycetes | Chaetothyriales | unidentified | unidentified | 8E-102 | 371 | 199 | 98.49 | 0 | 0 |
| OTU206 | GQ999538  | Fungi | Ascomycota | Eurotiomycetes | Chaetothyriales | unidentified | unidentified | 2E-44  | 180 | 107 | 98.13 | 2 | 2 |
| OTU147 | KM246756  | Fungi | Ascomycota | Eurotiomycetes | Chaetothyriales | unidentified | unidentified | 2E-77  | 289 | 174 | 97.13 | 2 | 2 |
| OTU340 | KM051384  | Fungi | Ascomycota | Eurotiomycetes | Chaetothyriales | unidentified | unidentified | 1E-72  | 274 | 154 | 98.05 | 1 | 1 |
| OTU116 | AB998432  | Fungi | Ascomycota | Eurotiomycetes | Chaetothyriales | unidentified | unidentified | 3E-47  | 188 | 111 | 98.2  | 2 | 2 |
| OTU453 | NR_073231 | Fungi | Ascomycota | Eurotiomycetes | Chaetothyriales | unidentified | unidentified | 2E-51  | 202 | 114 | 98.25 | 1 | 1 |
| OTU108 | AB036065  | Fungi | Ascomycota | Eurotiomycetes | Chaetothyriales | unidentified | unidentified | 1E-69  | 264 | 145 | 97.93 | 0 | 0 |
| OTU426 | KJ652493  | Fungi | Ascomycota | Eurotiomycetes | Chaetothyriales | unidentified | unidentified | 2E-99  | 363 | 183 | 100   | 0 | 0 |
| OTU177 | EF504325  | Fungi | Ascomycota | Eurotiomycetes | Chaetothyriales | unidentified | unidentified | 9E-51  | 200 | 109 | 98.17 | 0 | 0 |

---

---

|        |          |       |            |                |                 |                |                    |        |     |     |       |   |   |
|--------|----------|-------|------------|----------------|-----------------|----------------|--------------------|--------|-----|-----|-------|---|---|
| OTU397 | KJ935008 | Fungi | Ascomycota | Eurotiomycetes | Chaetothyriales | unidentified   | unidentified       | 3E-89  | 329 | 190 | 97.89 | 2 | 2 |
| OTU43  | KM215637 | Fungi | Ascomycota | Eurotiomycetes | Chaetothyriales | unidentified   | unidentified       | 6E-65  | 248 | 157 | 96.82 | 3 | 3 |
| OTU2   | GQ999538 | Fungi | Ascomycota | Eurotiomycetes | Chaetothyriales | unidentified   | unidentified       | 2E-50  | 200 | 105 | 99.05 | 0 | 0 |
| OTU8   | GQ999538 | Fungi | Ascomycota | Eurotiomycetes | Chaetothyriales | unidentified   | unidentified       | 2E-50  | 200 | 105 | 99.05 | 0 | 0 |
| OTU22  | KJ572145 | Fungi | Ascomycota | Eurotiomycetes | Chaetothyriales | unidentified   | unidentified       | 6E-68  | 258 | 146 | 97.26 | 0 | 0 |
| OTU87  | KF146177 | Fungi | Ascomycota | Eurotiomycetes | Chaetothyriales | unidentified   | unidentified       | 8E-102 | 371 | 199 | 98.49 | 0 | 0 |
| OTU497 | GQ999538 | Fungi | Ascomycota | Eurotiomycetes | Chaetothyriales | unidentified   | unidentified       | 1E-42  | 174 | 104 | 97.12 | 1 | 1 |
| OTU485 | KP099830 | Fungi | Ascomycota | Eurotiomycetes | Chaetothyriales | unidentified   | unidentified       | 1E-106 | 387 | 211 | 98.58 | 1 | 1 |
| OTU154 | KF496199 | Fungi | Ascomycota | Eurotiomycetes | Chaetothyriales | unidentified   | unidentified       | 4E-66  | 252 | 154 | 96.75 | 2 | 3 |
| OTU156 | AB693792 | Fungi | Ascomycota | Eurotiomycetes | Chaetothyriales | unidentified   | unidentified       | 1E-65  | 250 | 138 | 98.55 | 1 | 1 |
| OTU178 | HF680223 | Fungi | Ascomycota | Eurotiomycetes | Chaetothyriales | unidentified   | unidentified       | 2E-61  | 236 | 119 | 100   | 0 | 0 |
| OTU212 | HE584827 | Fungi | Ascomycota | Eurotiomycetes | Chaetothyriales | unidentified   | unidentified       | 5E-32  | 139 | 176 | 87.5  | 5 | 7 |
| OTU228 | JQ599382 | Fungi | Ascomycota | Eurotiomycetes | Chaetothyriales | unidentified   | unidentified       | 9E-89  | 327 | 165 | 100   | 0 | 0 |
| OTU379 | AF444483 | Fungi | Ascomycota | Eurotiomycetes | Chaetothyriales | unidentified   | unidentified       | 9E-23  | 107 | 74  | 94.59 | 1 | 1 |
| OTU399 | AB255241 | Fungi | Ascomycota | Eurotiomycetes | Chaetothyriales | unidentified   | unidentified       | 6E-59  | 228 | 150 | 96.67 | 4 | 5 |
| OTU427 | KM036093 | Fungi | Ascomycota | Eurotiomycetes | Chaetothyriales | unidentified   | unidentified       | 1E-62  | 240 | 145 | 97.93 | 3 | 3 |
| OTU459 | JX014309 | Fungi | Ascomycota | Eurotiomycetes | Chaetothyriales | unidentified   | unidentified       | 9E-99  | 361 | 225 | 95.56 | 1 | 2 |
| OTU513 | DQ530216 | Fungi | Ascomycota | Eurotiomycetes | Chaetothyriales | unidentified   | unidentified       | 1E-35  | 151 | 141 | 91.49 | 5 | 8 |
| OTU516 | FJ372393 | Fungi | Ascomycota | Eurotiomycetes | Chaetothyriales | unidentified   | unidentified       | 8E-99  | 361 | 190 | 99.47 | 1 | 1 |
| OTU448 | KF143783 | Fungi | Ascomycota | Eurotiomycetes | Eurotiales      | Trichocomaceae | <i>Aspergillus</i> | 4E-66  | 252 | 159 | 97.48 | 4 | 4 |
| OTU233 | HM992800 | Fungi | Ascomycota | Eurotiomycetes | Eurotiales      | Trichocomaceae | <i>Aspergillus</i> | 2E-38  | 161 | 101 | 97.03 | 2 | 2 |
| OTU253 | AY254153 | Fungi | Ascomycota | Eurotiomycetes | Eurotiales      | Trichocomaceae | <i>Aspergillus</i> | 2E-74  | 280 | 161 | 98.14 | 2 | 2 |
| OTU216 | KJ531966 | Fungi | Ascomycota | Eurotiomycetes | Eurotiales      | Trichocomaceae | <i>Aspergillus</i> | 1E-62  | 240 | 129 | 99.22 | 1 | 1 |
| OTU442 | AB255305 | Fungi | Ascomycota | Eurotiomycetes | Eurotiales      | Trichocomaceae | <i>Aspergillus</i> | 2E-67  | 256 | 141 | 98.58 | 1 | 1 |
| OTU402 | GQ999538 | Fungi | Ascomycota | Eurotiomycetes | Eurotiales      | Trichocomaceae | <i>Aspergillus</i> | 5E-48  | 192 | 105 | 98.1  | 0 | 0 |
| OTU336 | HQ010680 | Fungi | Ascomycota | Eurotiomycetes | Eurotiales      | Trichocomaceae | <i>Aspergillus</i> | 5E-31  | 135 | 127 | 92.91 | 6 | 7 |

---

---

|        |          |       |            |                |            |                |                    |       |     |     |       |   |    |
|--------|----------|-------|------------|----------------|------------|----------------|--------------------|-------|-----|-----|-------|---|----|
| OTU348 | KM051384 | Fungi | Ascomycota | Eurotiomycetes | Eurotiales | Trichocomaceae | <i>Aspergillus</i> | 1E-81 | 303 | 161 | 98.76 | 0 | 0  |
| OTU234 | JX875930 | Fungi | Ascomycota | Eurotiomycetes | Eurotiales | Trichocomaceae | <i>Aspergillus</i> | 2E-71 | 270 | 148 | 98.65 | 1 | 1  |
| OTU547 | JX624261 | Fungi | Ascomycota | Eurotiomycetes | Eurotiales | Trichocomaceae | <i>Aspergillus</i> | 3E-57 | 222 | 151 | 96.03 | 4 | 5  |
| OTU135 | HM992800 | Fungi | Ascomycota | Eurotiomycetes | Eurotiales | Trichocomaceae | <i>Eurotium</i>    | 8E-90 | 331 | 227 | 95.59 | 5 | 5  |
| OTU519 | FJ820729 | Fungi | Ascomycota | Eurotiomycetes | Eurotiales | Trichocomaceae | <i>Neosartorya</i> | 3E-67 | 256 | 157 | 96.82 | 2 | 2  |
| OTU357 | KF675509 | Fungi | Ascomycota | Eurotiomycetes | Eurotiales | Trichocomaceae | <i>Neosartorya</i> | 9E-58 | 224 | 149 | 94.63 | 1 | 1  |
| OTU521 | GU461502 | Fungi | Ascomycota | Eurotiomycetes | Eurotiales | Trichocomaceae | <i>Penicillium</i> | 8E-30 | 131 | 126 | 88.89 | 2 | 6  |
| OTU480 | KM056275 | Fungi | Ascomycota | Eurotiomycetes | Eurotiales | Trichocomaceae | <i>Penicillium</i> | 2E-74 | 280 | 157 | 98.73 | 2 | 2  |
| OTU21  | KM246756 | Fungi | Ascomycota | Eurotiomycetes | Eurotiales | Trichocomaceae | <i>Penicillium</i> | 6E-84 | 311 | 177 | 97.74 | 1 | 1  |
| OTU62  | KM246756 | Fungi | Ascomycota | Eurotiomycetes | Eurotiales | Trichocomaceae | <i>Penicillium</i> | 3E-76 | 285 | 179 | 96.65 | 3 | 4  |
| OTU358 | KM246204 | Fungi | Ascomycota | Eurotiomycetes | Eurotiales | Trichocomaceae | <i>Penicillium</i> | 5E-56 | 218 | 150 | 96    | 4 | 4  |
| OTU561 | AY853194 | Fungi | Ascomycota | Eurotiomycetes | Eurotiales | Trichocomaceae | <i>Penicillium</i> | 4E-66 | 252 | 139 | 98.56 | 1 | 1  |
| OTU51  | KM246232 | Fungi | Ascomycota | Eurotiomycetes | Eurotiales | Trichocomaceae | <i>Penicillium</i> | 4E-44 | 178 | 122 | 95.08 | 2 | 2  |
| OTU168 | EU035415 | Fungi | Ascomycota | Eurotiomycetes | Eurotiales | Trichocomaceae | <i>Penicillium</i> | 2E-56 | 220 | 199 | 91.46 | 6 | 10 |
| OTU60  | JX624261 | Fungi | Ascomycota | Eurotiomycetes | Eurotiales | Trichocomaceae | <i>Penicillium</i> | 3E-73 | 276 | 143 | 99.3  | 0 | 0  |
| OTU104 | EU686935 | Fungi | Ascomycota | Eurotiomycetes | Eurotiales | Trichocomaceae | <i>Penicillium</i> | 6E-22 | 105 | 93  | 90.32 | 1 | 1  |
| OTU32  | KM051384 | Fungi | Ascomycota | Eurotiomycetes | Eurotiales | Trichocomaceae | <i>Penicillium</i> | 1E-78 | 293 | 164 | 97.56 | 0 | 0  |
| OTU517 | FJ770078 | Fungi | Ascomycota | Eurotiomycetes | Eurotiales | Trichocomaceae | <i>Penicillium</i> | 8E-52 | 204 | 139 | 94.96 | 2 | 2  |
| OTU52  | GQ999538 | Fungi | Ascomycota | Eurotiomycetes | Eurotiales | Trichocomaceae | <i>Penicillium</i> | 1E-48 | 194 | 102 | 99.02 | 0 | 0  |
| OTU105 | AB255241 | Fungi | Ascomycota | Eurotiomycetes | Eurotiales | Trichocomaceae | <i>Penicillium</i> | 4E-63 | 242 | 146 | 97.26 | 2 | 2  |
| OTU404 | HQ631052 | Fungi | Ascomycota | Eurotiomycetes | Eurotiales | Trichocomaceae | <i>Penicillium</i> | 1E-29 | 131 | 165 | 86.67 | 3 | 4  |
| OTU335 | DQ682585 | Fungi | Ascomycota | Eurotiomycetes | Eurotiales | Trichocomaceae | <i>Penicillium</i> | 1E-41 | 170 | 141 | 92.91 | 4 | 5  |
| OTU560 | AJ582964 | Fungi | Ascomycota | Eurotiomycetes | Eurotiales | Trichocomaceae | <i>Penicillium</i> | 9E-99 | 361 | 228 | 96.05 | 3 | 5  |
| OTU12  | KM246756 | Fungi | Ascomycota | Eurotiomycetes | Eurotiales | Trichocomaceae | <i>Penicillium</i> | 9E-86 | 317 | 176 | 97.73 | 0 | 0  |
| OTU19  | GQ999538 | Fungi | Ascomycota | Eurotiomycetes | Eurotiales | Trichocomaceae | <i>Penicillium</i> | 3E-43 | 176 | 105 | 96.19 | 0 | 0  |
| OTU194 | KC753419 | Fungi | Ascomycota | Eurotiomycetes | Eurotiales | Trichocomaceae | <i>Penicillium</i> | 1E-38 | 161 | 144 | 90.97 | 3 | 4  |

---

|        |           |       |            |                |            |                |                       |       |     |     |       |   |    |
|--------|-----------|-------|------------|----------------|------------|----------------|-----------------------|-------|-----|-----|-------|---|----|
| OTU286 | KC491368  | Fungi | Ascomycota | Eurotiomycetes | Eurotiales | Trichocomaceae | <i>Penicillium</i>    | 4E-92 | 339 | 242 | 93.39 | 2 | 3  |
| OTU411 | AB036065  | Fungi | Ascomycota | Eurotiomycetes | Eurotiales | Trichocomaceae | <i>Penicillium</i>    | 6E-71 | 268 | 139 | 99.28 | 0 | 0  |
| OTU230 | JX014309  | Fungi | Ascomycota | Eurotiomycetes | Eurotiales | Trichocomaceae | <i>Penicillium</i>    | 2E-93 | 343 | 224 | 95.98 | 4 | 5  |
| OTU532 | AB540574  | Fungi | Ascomycota | Eurotiomycetes | Eurotiales | Trichocomaceae | <i>Penicillium</i>    | 5E-75 | 281 | 166 | 96.99 | 1 | 1  |
| OTU449 | KJ572145  | Fungi | Ascomycota | Eurotiomycetes | Eurotiales | Trichocomaceae | <i>Penicillium</i>    | 9E-64 | 244 | 147 | 97.28 | 2 | 2  |
| OTU564 | EU035415  | Fungi | Ascomycota | Eurotiomycetes | Eurotiales | Trichocomaceae | <i>Penicillium</i>    | 2E-65 | 250 | 194 | 92.78 | 4 | 8  |
| OTU214 | KJ619992  | Fungi | Ascomycota | Eurotiomycetes | Eurotiales | Trichocomaceae | <i>Penicillium</i>    | 4E-66 | 252 | 150 | 97.33 | 2 | 3  |
| OTU250 | KJ572145  | Fungi | Ascomycota | Eurotiomycetes | Eurotiales | Trichocomaceae | <i>Penicillium</i>    | 2E-64 | 246 | 148 | 97.3  | 2 | 2  |
| OTU354 | HE584827  | Fungi | Ascomycota | Eurotiomycetes | Eurotiales | Trichocomaceae | <i>Penicillium</i>    | 6E-35 | 149 | 169 | 87.57 | 3 | 5  |
| OTU370 | GQ999538  | Fungi | Ascomycota | Eurotiomycetes | Eurotiales | Trichocomaceae | <i>Penicillium</i>    | 5E-48 | 192 | 105 | 98.1  | 0 | 0  |
| OTU418 | FJ820729  | Fungi | Ascomycota | Eurotiomycetes | Eurotiales | Trichocomaceae | <i>Penicillium</i>    | 3E-61 | 236 | 166 | 94.58 | 3 | 4  |
| OTU207 | JF945390  | Fungi | Ascomycota | Eurotiomycetes | Eurotiales | Trichocomaceae | <i>Talaromyces</i>    | 3E-48 | 192 | 133 | 96.24 | 4 | 4  |
| OTU563 | EU035415  | Fungi | Ascomycota | Eurotiomycetes | Eurotiales | Trichocomaceae | <i>Talaromyces</i>    | 1E-42 | 174 | 205 | 88.78 | 8 | 15 |
| OTU415 | EF114689  | Fungi | Ascomycota | Eurotiomycetes | Eurotiales | Trichocomaceae | <i>Talaromyces</i>    | 7E-43 | 174 | 147 | 90.48 | 1 | 2  |
| OTU278 | JX624261  | Fungi | Ascomycota | Eurotiomycetes | Eurotiales | Trichocomaceae | <i>Talaromyces</i>    | 5E-59 | 228 | 147 | 96.6  | 3 | 3  |
| OTU582 | NR_073279 | Fungi | Ascomycota | Eurotiomycetes | Eurotiales | Trichocomaceae | <i>Talaromyces</i>    | 5E-78 | 291 | 159 | 98.11 | 0 | 0  |
| OTU401 | AB998368  | Fungi | Ascomycota | Eurotiomycetes | Eurotiales | Trichocomaceae | <i>Talaromyces</i>    | 2E-93 | 343 | 181 | 99.45 | 1 | 1  |
| OTU531 | KP131815  | Fungi | Ascomycota | Eurotiomycetes | Eurotiales | Trichocomaceae | <i>Talaromyces</i>    | 1E-68 | 260 | 139 | 99.28 | 1 | 1  |
| OTU546 | HQ649891  | Fungi | Ascomycota | Eurotiomycetes | Onygenales | Onygenaceae    | <i>Chrysosporium</i>  | 7E-59 | 228 | 168 | 92.86 | 2 | 5  |
| OTU551 | KJ909773  | Fungi | Ascomycota | Eurotiomycetes | Onygenales | Onygenaceae    | <i>Chrysosporium</i>  | 1E-88 | 327 | 173 | 99.42 | 1 | 1  |
| OTU509 | NR_073337 | Fungi | Ascomycota | Eurotiomycetes | Onygenales | Onygenaceae    | <i>Chrysosporium</i>  | 2E-21 | 103 | 98  | 89.8  | 2 | 4  |
| OTU468 | EU041803  | Fungi | Ascomycota | Eurotiomycetes | Onygenales | Onygenaceae    | <i>Rhinocladiella</i> | 1E-38 | 161 | 149 | 93.29 | 7 | 7  |
| OTU45  | DQ530216  | Fungi | Ascomycota | Eurotiomycetes | Onygenales | Onygenaceae    | <i>Rhinocladiella</i> | 3E-42 | 172 | 143 | 93.01 | 4 | 4  |
| OTU243 | EU035415  | Fungi | Ascomycota | Eurotiomycetes | Onygenales | Onygenaceae    | <i>Rhinocladiella</i> | 3E-58 | 226 | 186 | 91.94 | 4 | 8  |
| OTU38  | KM066541  | Fungi | Ascomycota | Eurotiomycetes | Onygenales | Onygenaceae    | <i>Rhinocladiella</i> | 6E-81 | 301 | 176 | 97.16 | 1 | 1  |
| OTU450 | KM100715  | Fungi | Ascomycota | Eurotiomycetes | Onygenales | Onygenaceae    | <i>Rhinocladiella</i> | 3E-67 | 256 | 156 | 97.44 | 3 | 4  |

|        |          |       |            |                 |                   |                   |                        |        |     |     |       |   |    |
|--------|----------|-------|------------|-----------------|-------------------|-------------------|------------------------|--------|-----|-----|-------|---|----|
| OTU482 | KM246756 | Fungi | Ascomycota | Eurotiomycetes  | Onygenales        | Onygenaceae       | <i>Rhinocladiella</i>  | 5E-78  | 291 | 171 | 97.66 | 2 | 2  |
| OTU481 | KM100715 | Fungi | Ascomycota | Eurotiomycetes  | Onygenales        | Onygenaceae       | <i>Rhinocladiella</i>  | 4E-69  | 262 | 154 | 97.4  | 2 | 4  |
| OTU77  | JQ520177 | Fungi | Ascomycota | Incertae        | Incertae          | Incertae          | <i>Acrodontium</i>     | 1E-88  | 327 | 201 | 97.01 | 3 | 3  |
| OTU557 | AB615578 | Fungi | Ascomycota | Incertae        | Incertae          | Incertae          | <i>Acrodontium</i>     | 2E-26  | 119 | 76  | 94.74 | 0 | 0  |
| OTU247 | GQ999538 | Fungi | Ascomycota | Incertae        | Incertae          | Incertae          | <i>Acrodontium</i>     | 1E-51  | 204 | 103 | 100   | 0 | 0  |
| OTU249 | JN198444 | Fungi | Ascomycota | Incertae        | Incertae          | Incertae          | <i>Acrodontium</i>     | 5E-75  | 281 | 158 | 98.73 | 2 | 2  |
| OTU294 | KF646151 | Fungi | Ascomycota | Incertae        | Incertae          | Pseudeurotiaceae  | <i>Pseudeurotium</i>   | 3E-37  | 155 | 78  | 100   | 0 | 0  |
| OTU476 | KF143800 | Fungi | Ascomycota | Incertae        |                   |                   |                        | 4E-66  | 252 | 139 | 98.56 | 1 | 1  |
| OTU773 | DQ914681 | Fungi | Ascomycota | Leotiomycetes   | Helotiales        | Incertae          | <i>Cystodendron</i>    | 5E-32  | 139 | 173 | 87.28 | 5 | 10 |
| OTU256 | HE584882 | Fungi | Ascomycota | Leotiomycetes   | Helotiales        | Incertae          | <i>Hyalodendriella</i> | 3E-39  | 163 | 140 | 91.43 | 3 | 5  |
| OTU115 | JX014309 | Fungi | Ascomycota | Leotiomycetes   | Helotiales        | Sclerotiniaceae   | <i>Ciboria</i>         | 3E-108 | 392 | 222 | 97.3  | 0 | 0  |
| OTU270 | DQ914681 | Fungi | Ascomycota | Leotiomycetes   | Helotiales        | Sclerotiniaceae   | <i>Ciboria</i>         | 9E-49  | 194 | 172 | 90.7  | 3 | 5  |
| OTU407 | KJ957774 | Fungi | Ascomycota | Leotiomycetes   | Helotiales        | Sclerotiniaceae   | unidentified           | 3E-73  | 276 | 163 | 98.16 | 3 | 3  |
| OTU393 | JN395828 | Fungi | Ascomycota | Leotiomycetes   | Helotiales        | Sclerotiniaceae   | unidentified           | 2E-44  | 180 | 228 | 86.4  | 5 | 12 |
| OTU231 | KC785567 | Fungi | Ascomycota | Leotiomycetes   | Incertae          | Myxotrichaceae    | <i>Oidiodendron</i>    | 4E-75  | 281 | 142 | 100   | 0 | 0  |
| OTU308 | JN904871 | Fungi | Ascomycota | Saccharomycetes | Saccharomycetales | Incertae          | <i>Candida</i>         | 1E-22  | 107 | 74  | 94.59 | 1 | 1  |
| OTU369 | KJ572145 | Fungi | Ascomycota | Saccharomycetes | Saccharomycetales | Incertae          | <i>Candida</i>         | 4E-66  | 252 | 147 | 97.28 | 1 | 1  |
| OTU490 | DQ530216 | Fungi | Ascomycota | Saccharomycetes | Saccharomycetales | Incertae          |                        | 1E-41  | 170 | 145 | 93.1  | 5 | 6  |
| OTU533 | AB693818 | Fungi | Ascomycota | Saccharomycetes | Saccharomycetales | Metschnikowiaceae | <i>Metschnikowia</i>   | 6E-87  | 321 | 170 | 99.41 | 1 | 1  |
| OTU81  | AB036065 | Fungi | Ascomycota | Saccharomycetes | Saccharomycetales | Metschnikowiaceae | <i>Metschnikowia</i>   | 4E-72  | 272 | 145 | 98.62 | 0 | 0  |
| OTU279 | KJ699113 | Fungi | Ascomycota | Saccharomycetes | Saccharomycetales | Metschnikowiaceae | <i>Metschnikowia</i>   | 4E-69  | 262 | 140 | 99.29 | 1 | 1  |
| OTU227 | KC978007 | Fungi | Ascomycota | Saccharomycetes | Saccharomycetales | Metschnikowiaceae | <i>Metschnikowia</i>   | 4E-98  | 359 | 216 | 96.3  | 1 | 2  |
| OTU196 | FJ762687 | Fungi | Ascomycota | Saccharomycetes | Saccharomycetales | Metschnikowiaceae | <i>Metschnikowia</i>   | 4E-66  | 252 | 143 | 97.9  | 1 | 1  |
| OTU190 | FJ425662 | Fungi | Ascomycota | Saccharomycetes | Saccharomycetales | Metschnikowiaceae | <i>Metschnikowia</i>   | 1E-41  | 170 | 134 | 93.28 | 3 | 3  |
| OTU289 | AF383955 | Fungi | Ascomycota | Saccharomycetes | Saccharomycetales | Metschnikowiaceae | <i>Metschnikowia</i>   | 1E-50  | 200 | 155 | 92.9  | 3 | 5  |
| OTU417 | FJ757656 | Fungi | Ascomycota | Saccharomycetes | Saccharomycetales | Metschnikowiaceae | <i>Metschnikowia</i>   | 2E-80  | 299 | 167 | 98.8  | 2 | 2  |



---

|        |           |       |            |                 |                   |                   |                      |        |     |     |       |   |   |
|--------|-----------|-------|------------|-----------------|-------------------|-------------------|----------------------|--------|-----|-----|-------|---|---|
| OTU151 | GQ999538  | Fungi | Ascomycota | Saccharomycetes | Saccharomycetales | Metschnikowiaceae | <i>Metschnikowia</i> | 1E-33  | 145 | 81  | 98.77 | 1 | 1 |
| OTU515 | EU002878  | Fungi | Ascomycota | Saccharomycetes | Saccharomycetales | Metschnikowiaceae | <i>Metschnikowia</i> | 4E-66  | 252 | 147 | 97.28 | 1 | 1 |
| OTU284 | GQ999538  | Fungi | Ascomycota | Saccharomycetes | Saccharomycetales | Metschnikowiaceae | <i>Metschnikowia</i> | 1E-48  | 194 | 106 | 98.11 | 0 | 0 |
| OTU215 | GQ999538  | Fungi | Ascomycota | Saccharomycetes | Saccharomycetales | Pichiaceae        | <i>Pichia</i>        | 8E-47  | 188 | 95  | 100   | 0 | 0 |
| OTU410 | UDB015281 | Fungi | Ascomycota | Saccharomycetes | Saccharomycetales | Pichiaceae        | <i>Pichia</i>        | 1E-91  | 337 | 234 | 94.44 | 3 | 3 |
| OTU323 | KM199317  | Fungi | Ascomycota | Sordariomycetes | Diaporthales      | Diaporthaceae     | <i>Phomopsis</i>     | 1E-106 | 387 | 195 | 100   | 0 | 0 |
| OTU180 | EU686935  | Fungi | Ascomycota | Sordariomycetes | Hypocreales       | Bionectriaceae    | <i>Bionectria</i>    | 1E-22  | 107 | 94  | 90.43 | 1 | 1 |
| OTU457 | DQ530216  | Fungi | Ascomycota | Sordariomycetes | Hypocreales       | Bionectriaceae    | unidentified         | 5E-44  | 178 | 139 | 92.81 | 3 | 6 |
| OTU471 | FJ820729  | Fungi | Ascomycota | Sordariomycetes | Hypocreales       | Clavicipitaceae   | <i>Metacordyceps</i> | 1E-66  | 254 | 166 | 95.18 | 2 | 4 |
| OTU300 | HM992800  | Fungi | Ascomycota | Sordariomycetes | Hypocreales       | Clavicipitaceae   | <i>Villosiclava</i>  | 3E-92  | 339 | 230 | 95.22 | 4 | 5 |
| OTU198 | KC354795  | Fungi | Ascomycota | Sordariomycetes | Hypocreales       | Cordycipitaceae   | <i>Beauveria</i>     | 2E-62  | 240 | 149 | 95.97 | 1 | 1 |
| OTU251 | NR_073337 | Fungi | Ascomycota | Sordariomycetes | Hypocreales       | Cordycipitaceae   | <i>Beauveria</i>     | 1E-25  | 117 | 105 | 90.48 | 2 | 4 |
| OTU160 | JX014309  | Fungi | Ascomycota | Sordariomycetes | Hypocreales       | Cordycipitaceae   | <i>Cordyceps</i>     | 1E-107 | 391 | 229 | 98.25 | 4 | 4 |
| OTU242 | KM051384  | Fungi | Ascomycota | Sordariomycetes | Hypocreales       | Hypocreaceae      | <i>Gliocladium</i>   | 2E-74  | 280 | 165 | 96.97 | 1 | 1 |
| OTU390 | AB998390  | Fungi | Ascomycota | Sordariomycetes | Hypocreales       | Hypocreaceae      | <i>Gliocladium</i>   | 9E-48  | 190 | 112 | 98.21 | 2 | 2 |
| OTU53  | FJ917556  | Fungi | Ascomycota | Sordariomycetes | Hypocreales       | Hypocreaceae      | <i>Gliocladium</i>   | 2E-96  | 353 | 194 | 98.97 | 2 | 2 |
| OTU352 | DQ530216  | Fungi | Ascomycota | Sordariomycetes | Hypocreales       | Hypocreaceae      | <i>Gliocladium</i>   | 2E-25  | 117 | 124 | 88.71 | 3 | 6 |
| OTU372 | JX043123  | Fungi | Ascomycota | Sordariomycetes | Hypocreales       | Hypocreaceae      | <i>Gliocladium</i>   | 2E-21  | 103 | 87  | 90.8  | 1 | 2 |
| OTU131 | GQ999538  | Fungi | Ascomycota | Sordariomycetes | Hypocreales       | Hypocreaceae      | <i>Hypocrea</i>      | 3E-46  | 186 | 106 | 98.11 | 1 | 1 |
| OTU455 | AM901803  | Fungi | Ascomycota | Sordariomycetes | Hypocreales       | Hypocreaceae      | <i>Hypocrea</i>      | 4E-66  | 252 | 139 | 97.84 | 0 | 0 |
| OTU211 | AB998390  | Fungi | Ascomycota | Sordariomycetes | Hypocreales       | Hypocreaceae      | <i>Hypocrea</i>      | 1E-52  | 206 | 108 | 99.07 | 0 | 0 |
| OTU304 | AY604831  | Fungi | Ascomycota | Sordariomycetes | Hypocreales       | Hypocreaceae      | <i>Hypocrea</i>      | 8E-46  | 184 | 157 | 92.99 | 5 | 5 |
| OTU420 | HM992800  | Fungi | Ascomycota | Sordariomycetes | Hypocreales       | Hypocreaceae      | <i>Trichoderma</i>   | 2E-93  | 343 | 227 | 94.71 | 2 | 4 |
| OTU330 | FJ820729  | Fungi | Ascomycota | Sordariomycetes | Hypocreales       | Hypocreaceae      | <i>Trichoderma</i>   | 3E-64  | 246 | 167 | 95.81 | 4 | 5 |
| OTU144 | GU981736  | Fungi | Ascomycota | Sordariomycetes | Hypocreales       | Hypocreaceae      | <i>Trichoderma</i>   | 9E-102 | 371 | 211 | 98.58 | 3 | 3 |
| OTU416 | EU035415  | Fungi | Ascomycota | Sordariomycetes | Hypocreales       | Hypocreaceae      | <i>Trichoderma</i>   | 3E-49  | 196 | 187 | 90.37 | 5 | 9 |

---

---

|        |           |       |            |                 |             |              |                       |        |     |     |       |   |    |
|--------|-----------|-------|------------|-----------------|-------------|--------------|-----------------------|--------|-----|-----|-------|---|----|
| OTU301 | JX875935  | Fungi | Ascomycota | Sordariomycetes | Hypocreales | Hypocreaceae | <i>Trichoderma</i>    | 1E-94  | 347 | 183 | 99.45 | 1 | 1  |
| OTU522 | HM162138  | Fungi | Ascomycota | Sordariomycetes | Hypocreales | Incertae     | <i>Acremonium</i>     | 9E-64  | 244 | 147 | 95.92 | 0 | 0  |
| OTU422 | JX014309  | Fungi | Ascomycota | Sordariomycetes | Hypocreales | Incertae     | <i>Acremonium</i>     | 3E-108 | 392 | 226 | 97.35 | 1 | 1  |
| OTU127 | FJ790250  | Fungi | Ascomycota | Sordariomycetes | Hypocreales | Incertae     | <i>Acremonium</i>     | 2E-28  | 127 | 96  | 94.79 | 3 | 3  |
| OTU165 | HM992800  | Fungi | Ascomycota | Sordariomycetes | Hypocreales | Incertae     | <i>Acremonium</i>     | 3E-77  | 289 | 230 | 94.35 | 8 | 8  |
| OTU239 | NR_077114 | Fungi | Ascomycota | Sordariomycetes | Hypocreales | Incertae     | <i>Myrothecium</i>    | 2E-67  | 256 | 133 | 99.25 | 0 | 0  |
| OTU183 | DQ530216  | Fungi | Ascomycota | Sordariomycetes | Hypocreales | Incertae     | <i>Myrothecium</i>    | 7E-34  | 145 | 145 | 92.41 | 7 | 7  |
| OTU772 | DQ530216  | Fungi | Ascomycota | Sordariomycetes | Hypocreales | Incertae     | <i>Sarocladium</i>    | 4E-23  | 109 | 138 | 89.86 | 7 | 8  |
| OTU803 | KF036591  | Fungi | Ascomycota | Sordariomycetes | Hypocreales | Incertae     | <i>Sarocladium</i>    | 4E-28  | 125 | 71  | 97.18 | 0 | 0  |
| OTU732 | EU035415  | Fungi | Ascomycota | Sordariomycetes | Hypocreales | Incertae     | <i>Sarocladium</i>    | 1E-32  | 141 | 196 | 87.24 | 8 | 15 |
| OTU800 | KC460868  | Fungi | Ascomycota | Sordariomycetes | Hypocreales | Incertae     | <i>Sarocladium</i>    | 7E-59  | 228 | 155 | 93.55 | 0 | 0  |
| OTU752 | KC978007  | Fungi | Ascomycota | Sordariomycetes | Hypocreales | Incertae     | <i>Sarocladium</i>    | 9E-99  | 361 | 218 | 96.79 | 2 | 2  |
| OTU714 | KC354795  | Fungi | Ascomycota | Sordariomycetes | Hypocreales | Incertae     | <i>Sarocladium</i>    | 2E-55  | 216 | 155 | 94.19 | 3 | 5  |
| OTU297 | KM527126  | Fungi | Ascomycota | Sordariomycetes | Hypocreales | Incertae     | <i>Sarocladium</i>    | 5E-59  | 228 | 143 | 95.8  | 1 | 1  |
| OTU315 | GQ999538  | Fungi | Ascomycota | Sordariomycetes | Hypocreales | Incertae     | <i>Sarocladium</i>    | 5E-48  | 192 | 97  | 100   | 0 | 0  |
| OTU723 | KM246756  | Fungi | Ascomycota | Sordariomycetes | Hypocreales | Incertae     | <i>Sarocladium</i>    | 2E-74  | 280 | 180 | 96.11 | 3 | 4  |
| OTU731 | DQ530216  | Fungi | Ascomycota | Sordariomycetes | Hypocreales | Incertae     | <i>Sarocladium</i>    | 7E-43  | 174 | 137 | 92.7  | 3 | 6  |
| OTU805 | KJ706360  | Fungi | Ascomycota | Sordariomycetes | Hypocreales | Incertae     | <i>Sarocladium</i>    | 6E-68  | 258 | 146 | 98.63 | 2 | 2  |
| OTU95  | GQ999538  | Fungi | Ascomycota | Sordariomycetes | Hypocreales | Incertae     |                       | 1E-45  | 184 | 105 | 98.1  | 1 | 1  |
| OTU374 | KF222008  | Fungi | Ascomycota | Sordariomycetes | Hypocreales | Incertae     |                       | 7E-46  | 184 | 132 | 93.18 | 1 | 2  |
| OTU355 | JN905220  | Fungi | Ascomycota | Sordariomycetes | Hypocreales | Incertae     |                       | 1E-28  | 127 | 120 | 92.5  | 5 | 5  |
| OTU421 | JQ747510  | Fungi | Ascomycota | Sordariomycetes | Hypocreales | Nectriaceae  | <i>Cylindrocarpon</i> | 1E-91  | 337 | 182 | 98.9  | 1 | 1  |
| OTU534 | AB980801  | Fungi | Ascomycota | Sordariomycetes | Hypocreales | Nectriaceae  | <i>Fusarium</i>       | 6E-93  | 341 | 172 | 100   | 0 | 0  |
| OTU366 | JX984735  | Fungi | Ascomycota | Sordariomycetes | Hypocreales | Nectriaceae  | <i>Fusarium</i>       | 8E-52  | 204 | 147 | 93.88 | 2 | 2  |
| OTU334 | KC485065  | Fungi | Ascomycota | Sordariomycetes | Hypocreales | Nectriaceae  | <i>Fusarium</i>       | 5E-75  | 281 | 170 | 96.47 | 1 | 1  |
| OTU85  | DQ530216  | Fungi | Ascomycota | Sordariomycetes | Hypocreales | Nectriaceae  | <i>Fusarium</i>       | 2E-37  | 157 | 143 | 92.31 | 5 | 5  |

---

|        |          |       |            |                 |             |                      |                        |        |     |     |       |   |    |
|--------|----------|-------|------------|-----------------|-------------|----------------------|------------------------|--------|-----|-----|-------|---|----|
| OTU158 | HE584882 | Fungi | Ascomycota | Sordariomycetes | Hypocreales | Nectriaceae          | <i>Fusarium</i>        | 3E-45  | 182 | 144 | 92.36 | 2 | 2  |
| OTU149 | FJ820729 | Fungi | Ascomycota | Sordariomycetes | Hypocreales | Nectriaceae          | <i>Fusarium</i>        | 3E-70  | 266 | 165 | 96.36 | 2 | 3  |
| OTU153 | JX014309 | Fungi | Ascomycota | Sordariomycetes | Hypocreales | Nectriaceae          | <i>Fusarium</i>        | 4E-104 | 379 | 227 | 97.36 | 3 | 3  |
| OTU440 | KM923758 | Fungi | Ascomycota | Sordariomycetes | Hypocreales | Nectriaceae          | <i>Fusarium</i>        | 4E-72  | 272 | 149 | 98.66 | 1 | 1  |
| OTU70  | AB255241 | Fungi | Ascomycota | Sordariomycetes | Hypocreales | Nectriaceae          | <i>Fusarium</i>        | 2E-64  | 246 | 136 | 98.53 | 1 | 1  |
| OTU34  | KF269234 | Fungi | Ascomycota | Sordariomycetes | Hypocreales | Nectriaceae          | <i>Fusarium</i>        | 2E-68  | 260 | 155 | 98.06 | 3 | 3  |
| OTU84  | JQ936142 | Fungi | Ascomycota | Sordariomycetes | Hypocreales | Nectriaceae          | <i>Fusarium</i>        | 7E-77  | 287 | 157 | 98.73 | 1 | 1  |
| OTU444 | FJ791145 | Fungi | Ascomycota | Sordariomycetes | Hypocreales | Nectriaceae          | <i>Fusarium</i>        | 3E-24  | 113 | 65  | 96.92 | 0 | 0  |
| OTU101 | JQ905732 | Fungi | Ascomycota | Sordariomycetes | Hypocreales | Nectriaceae          | <i>Fusidium</i>        | 7E-68  | 258 | 142 | 97.89 | 0 | 0  |
| OTU325 | KF212203 | Fungi | Ascomycota | Sordariomycetes | Hypocreales | Nectriaceae          | <i>Fusidium</i>        | 3E-73  | 276 | 155 | 98.71 | 2 | 2  |
| OTU161 | Z81427   | Fungi | Ascomycota | Sordariomycetes | Hypocreales | Nectriaceae          | <i>Fusidium</i>        | 1E-41  | 170 | 130 | 91.54 | 0 | 0  |
| OTU260 | KC485065 | Fungi | Ascomycota | Sordariomycetes | Hypocreales | Nectriaceae          | <i>Nectria</i>         | 3E-70  | 266 | 170 | 95.88 | 2 | 2  |
| OTU328 | EF504325 | Fungi | Ascomycota | Sordariomycetes | Hypocreales | Nectriaceae          | <i>Nectria</i>         | 8E-45  | 180 | 111 | 97.3  | 2 | 2  |
| OTU538 | EU035415 | Fungi | Ascomycota | Sordariomycetes | Hypocreales | Niessliaceae         | <i>Myrmaecium</i>      | 1E-39  | 165 | 205 | 88.78 | 9 | 15 |
| OTU150 | GU721805 | Fungi | Ascomycota | Sordariomycetes | Hypocreales | Ophiocordycipitaceae | <i>Purpureocillium</i> | 3E-76  | 285 | 152 | 98.68 | 0 | 0  |
| OTU302 | AB733121 | Fungi | Ascomycota | Sordariomycetes | Hypocreales | Stachybotriaceae     | <i>Stachybotrys</i>    | 5E-97  | 355 | 203 | 98.03 | 2 | 2  |
| OTU458 | DQ914681 | Fungi | Ascomycota | Sordariomycetes | Hypocreales | unidentified         | unidentified           | 6E-50  | 198 | 168 | 91.67 | 3 | 3  |
| OTU119 | DQ068346 | Fungi | Ascomycota | Sordariomycetes | Hypocreales | unidentified         | unidentified           | 3E-39  | 163 | 82  | 100   | 0 | 0  |
| OTU493 | FJ627262 | Fungi | Ascomycota | Sordariomycetes | Hypocreales | unidentified         | unidentified           | 4E-82  | 305 | 202 | 96.04 | 4 | 4  |
| OTU755 | KJ911228 | Fungi | Ascomycota | Sordariomycetes | Incertae    | Apiosporaceae        | <i>Arthrinium</i>      | 9E-108 | 391 | 209 | 99.04 | 1 | 1  |
| OTU132 | KF435380 | Fungi | Ascomycota | Sordariomycetes | Incertae    | Apiosporaceae        | <i>Arthrinium</i>      | 3E-39  | 163 | 126 | 93.65 | 3 | 3  |
| OTU541 | FJ627262 | Fungi | Ascomycota | Sordariomycetes | Incertae    | Cephalothecaceae     | <i>Phialemonium</i>    | 7E-84  | 311 | 205 | 96.59 | 5 | 5  |
| OTU464 | KJ608106 | Fungi | Ascomycota | Sordariomycetes | Incertae    | Cephalothecaceae     | <i>Phialemonium</i>    | 2E-58  | 226 | 118 | 99.15 | 0 | 0  |
| OTU475 | KC485065 | Fungi | Ascomycota | Sordariomycetes | Incertae    | Cephalothecaceae     | <i>Phialemonium</i>    | 2E-77  | 289 | 170 | 97.06 | 1 | 1  |
| OTU222 | KJ598810 | Fungi | Ascomycota | Sordariomycetes | Incertae    | Cephalothecaceae     | <i>Phialemonium</i>    | 2E-93  | 343 | 181 | 99.45 | 1 | 1  |
| OTU525 | JX268524 | Fungi | Ascomycota | Sordariomycetes | Incertae    | Cephalothecaceae     | <i>Phialemonium</i>    | 7E-59  | 228 | 174 | 93.1  | 3 | 4  |

---

|        |           |       |            |                 |                |                      |                         |        |     |     |       |   |   |
|--------|-----------|-------|------------|-----------------|----------------|----------------------|-------------------------|--------|-----|-----|-------|---|---|
| OTU79  | AF325173  | Fungi | Ascomycota | Sordariomycetes | Incertae       | Cephalothecaceae     | <i>Phialemonium</i>     | 2E-42  | 172 | 111 | 96.4  | 2 | 2 |
| OTU495 | FJ790250  | Fungi | Ascomycota | Sordariomycetes | Incertae       | Cephalothecaceae     | <i>Phialemonium</i>     | 1E-22  | 107 | 94  | 92.55 | 3 | 3 |
| OTU571 | JN905318  | Fungi | Ascomycota | Sordariomycetes | Incertae       | Cephalothecaceae     | <i>Phialemonium</i>     | 5E-59  | 228 | 115 | 100   | 0 | 0 |
| OTU14  | FJ820729  | Fungi | Ascomycota | Sordariomycetes | Incertae       | Cephalothecaceae     | <i>Phialemonium</i>     | 3E-67  | 256 | 164 | 95.12 | 1 | 2 |
| OTU31  | KC685630  | Fungi | Ascomycota | Sordariomycetes | Incertae       | Cephalothecaceae     | <i>Phialemonium</i>     | 8E-58  | 224 | 129 | 98.45 | 2 | 2 |
| OTU438 | KF746124  | Fungi | Ascomycota | Sordariomycetes | Incertae       | Cephalothecaceae     | <i>Phialemonium</i>     | 5E-97  | 355 | 187 | 99.47 | 1 | 1 |
| OTU4   | KC354795  | Fungi | Ascomycota | Sordariomycetes | Incertae       | Cephalothecaceae     | <i>Phialemonium</i>     | 6E-65  | 248 | 153 | 95.42 | 0 | 0 |
| OTU143 | NR_073218 | Fungi | Ascomycota | Sordariomycetes | Incertae       | Cephalothecaceae     | <i>Phialemonium</i>     | 2E-51  | 202 | 110 | 98.18 | 0 | 0 |
| OTU124 | KJ572145  | Fungi | Ascomycota | Sordariomycetes | Incertae       | Cephalothecaceae     | <i>Phialemonium</i>     | 3E-73  | 276 | 139 | 100   | 0 | 0 |
| OTU220 | JX014309  | Fungi | Ascomycota | Sordariomycetes | Incertae       | Glomerellaceae       | <i>Colletotrichum</i>   | 1E-101 | 371 | 203 | 98.52 | 1 | 1 |
| OTU389 | AB615460  | Fungi | Ascomycota | Sordariomycetes | Incertae       | Incertae             | <i>Myrmecridium</i>     | 3E-39  | 163 | 124 | 91.94 | 2 | 8 |
| OTU765 | AB615578  | Fungi | Ascomycota | Sordariomycetes | Incertae       | Plectosphaerellaceae | <i>Plectosphaerella</i> | 4E-31  | 135 | 68  | 100   | 0 | 0 |
| OTU167 | AB520352  | Fungi | Ascomycota | Sordariomycetes | Incertae       | Plectosphaerellaceae | <i>Verticillium</i>     | 4E-53  | 208 | 117 | 98.29 | 1 | 1 |
| OTU489 | AJ582964  | Fungi | Ascomycota | Sordariomycetes | Microascales   | Halosphaeriaceae     | unidentified            | 2E-106 | 387 | 223 | 98.21 | 3 | 3 |
| OTU191 | JN905220  | Fungi | Ascomycota | Sordariomycetes | Microascales   | Microasaceae         | <i>Kernia</i>           | 1E-31  | 137 | 116 | 91.38 | 2 | 3 |
| OTU189 | KM100715  | Fungi | Ascomycota | Sordariomycetes | Microascales   | Microasaceae         | <i>Kernia</i>           | 6E-68  | 258 | 154 | 97.4  | 2 | 2 |
| OTU241 | GU981736  | Fungi | Ascomycota | Sordariomycetes | Microascales   | Microasaceae         | <i>Kernia</i>           | 1E-91  | 337 | 214 | 96.26 | 3 | 3 |
| OTU327 | AY254153  | Fungi | Ascomycota | Sordariomycetes | Microascales   | Microasaceae         | <i>Kernia</i>           | 1E-57  | 224 | 169 | 95.86 | 7 | 7 |
| OTU264 | KJ572145  | Fungi | Ascomycota | Sordariomycetes | Microascales   | Microasaceae         | <i>Kernia</i>           | 3E-73  | 276 | 147 | 98.64 | 0 | 0 |
| OTU501 | JQ936271  | Fungi | Ascomycota | Sordariomycetes | Microascales   | Microasaceae         | <i>Kernia</i>           | 1E-75  | 283 | 195 | 93.85 | 2 | 6 |
| OTU381 | GQ999538  | Fungi | Ascomycota | Sordariomycetes | Microascales   | Microasaceae         | <i>Microascus</i>       | 2E-44  | 180 | 103 | 98.06 | 1 | 1 |
| OTU423 | JX524287  | Fungi | Ascomycota | Sordariomycetes | Microascales   | Microasaceae         | <i>Microascus</i>       | 8E-52  | 204 | 155 | 93.55 | 3 | 3 |
| OTU235 | NR_073231 | Fungi | Ascomycota | Sordariomycetes | Microascales   | Microasaceae         | <i>Microascus</i>       | 2E-51  | 202 | 110 | 98.18 | 0 | 0 |
| OTU26  | AB255241  | Fungi | Ascomycota | Sordariomycetes | Phyllachorales | Phyllachoraceae      | <i>Phyllachora</i>      | 9E-64  | 244 | 147 | 97.28 | 2 | 2 |
| OTU311 | KJ572129  | Fungi | Ascomycota | Sordariomycetes | Sordariales    | Chaetomiaceae        | <i>Chaetomium</i>       | 5E-59  | 228 | 142 | 97.18 | 3 | 4 |
| OTU312 | KJ572205  | Fungi | Ascomycota | Sordariomycetes | Sordariales    | Chaetomiaceae        | <i>Chaetomium</i>       | 3E-114 | 412 | 208 | 100   | 0 | 0 |

---

---

|        |           |       |            |                 |                   |                 |                   |        |      |     |       |   |   |
|--------|-----------|-------|------------|-----------------|-------------------|-----------------|-------------------|--------|------|-----|-------|---|---|
| OTU500 | JF945390  | Fungi | Ascomycota | Sordariomycetes | Sordariales       | Chaetomiaceae   | <i>Chaetomium</i> | 2E-55  | 216  | 125 | 98.4  | 2 | 2 |
| OTU524 | JX014309  | Fungi | Ascomycota | Sordariomycetes | Sordariales       | Chaetomiaceae   | <i>Chaetomium</i> | 1E-73  | 278  | 176 | 96.59 | 3 | 3 |
| OTU364 | HM992800  | Fungi | Ascomycota | Sordariomycetes | Sordariales       | Lasiochaetaceae | <i>Cercophora</i> | 5E-91  | 335  | 228 | 94.3  | 2 | 3 |
| OTU337 | JX966555  | Fungi | Ascomycota | Sordariomycetes | Sordariales       | Sordariaceae    | <i>Neurospora</i> | 2E-68  | 260  | 175 | 94.29 | 1 | 1 |
| OTU784 | HM992800  | Fungi | Ascomycota | Sordariomycetes | Trichosphaeriales | Incertae        | <i>Nigrospora</i> | 1E-88  | 327  | 225 | 94.67 | 3 | 3 |
| OTU529 | KC507224  | Fungi | Ascomycota | Sordariomycetes | Trichosphaeriales | Incertae        | <i>Nigrospora</i> | 5E-65  | 248  | 137 | 97.81 | 0 | 0 |
| OTU552 | KJ957778  | Fungi | Ascomycota | Sordariomycetes | Trichosphaeriales | Incertae        | <i>Nigrospora</i> | 9E-64  | 244  | 150 | 97.33 | 3 | 4 |
| OTU814 | NR_073264 | Fungi | Ascomycota | Sordariomycetes | Trichosphaeriales | Incertae        | <i>Nigrospora</i> | 3E-20  | 99.6 | 102 | 88.24 | 1 | 1 |
| OTU767 | AB980801  | Fungi | Ascomycota | Sordariomycetes | Trichosphaeriales | Incertae        | <i>Nigrospora</i> | 1E-84  | 313  | 162 | 99.38 | 0 | 0 |
| OTU793 | JX649198  | Fungi | Ascomycota | Sordariomycetes | Trichosphaeriales | Incertae        | <i>Nigrospora</i> | 4E-23  | 109  | 118 | 88.14 | 2 | 3 |
| OTU71  | KF146177  | Fungi | Ascomycota | Sordariomycetes | Trichosphaeriales | Incertae        | <i>Nigrospora</i> | 8E-102 | 371  | 199 | 98.49 | 0 | 0 |
| OTU172 | KC354795  | Fungi | Ascomycota | Sordariomycetes | Trichosphaeriales | Incertae        | <i>Nigrospora</i> | 3E-67  | 256  | 157 | 96.18 | 1 | 1 |
| OTU111 | AB769904  | Fungi | Ascomycota | Sordariomycetes | Trichosphaeriales | Incertae        | <i>Nigrospora</i> | 2E-106 | 387  | 234 | 96.58 | 2 | 3 |
| OTU136 | HM992800  | Fungi | Ascomycota | Sordariomycetes | Trichosphaeriales | Incertae        | <i>Nigrospora</i> | 3E-89  | 329  | 229 | 94.76 | 4 | 5 |
| OTU719 | KF269234  | Fungi | Ascomycota | Sordariomycetes | Trichosphaeriales | Incertae        | <i>Nigrospora</i> | 3E-79  | 295  | 149 | 100   | 0 | 0 |
| OTU779 | FJ776691  | Fungi | Ascomycota | Sordariomycetes | Trichosphaeriales | Incertae        | <i>Nigrospora</i> | 2E-62  | 240  | 157 | 96.82 | 4 | 4 |
| OTU797 | KC193592  | Fungi | Ascomycota | Sordariomycetes | Trichosphaeriales | Incertae        | <i>Nigrospora</i> | 2E-87  | 323  | 202 | 96.53 | 3 | 4 |
| OTU550 | KF156293  | Fungi | Ascomycota | Sordariomycetes | Trichosphaeriales | Incertae        | <i>Nigrospora</i> | 3E-73  | 276  | 143 | 99.3  | 0 | 0 |
| OTU338 | JX967397  | Fungi | Ascomycota | Sordariomycetes | Trichosphaeriales | Incertae        | <i>Nigrospora</i> | 3E-47  | 188  | 95  | 100   | 0 | 0 |
| OTU314 | FJ917556  | Fungi | Ascomycota | Sordariomycetes | Trichosphaeriales | Incertae        | <i>Nigrospora</i> | 1E-97  | 357  | 188 | 98.94 | 0 | 0 |
| OTU107 | DQ530216  | Fungi | Ascomycota | Sordariomycetes | Trichosphaeriales | Incertae        | <i>Nigrospora</i> | 4E-38  | 159  | 140 | 90.71 | 3 | 7 |
| OTU23  | KM246756  | Fungi | Ascomycota | Sordariomycetes | Trichosphaeriales | Incertae        | <i>Nigrospora</i> | 1E-78  | 293  | 176 | 96.59 | 1 | 1 |
| OTU736 | FN565296  | Fungi | Ascomycota | Sordariomycetes | Trichosphaeriales | Incertae        | <i>Nigrospora</i> | 1E-62  | 240  | 149 | 96.64 | 2 | 2 |
| OTU745 | JQ038351  | Fungi | Ascomycota | Sordariomycetes | Trichosphaeriales | Incertae        | <i>Nigrospora</i> | 6E-68  | 258  | 144 | 97.22 | 0 | 0 |
| OTU750 | KC491368  | Fungi | Ascomycota | Sordariomycetes | Trichosphaeriales | Incertae        | <i>Nigrospora</i> | 3E-40  | 167  | 204 | 87.75 | 5 | 5 |
| OTU794 | JX976056  | Fungi | Ascomycota | Sordariomycetes | Trichosphaeriales | Incertae        | <i>Nigrospora</i> | 3E-92  | 339  | 195 | 97.95 | 2 | 2 |

---

|        |           |       |            |                 |                   |                   |                       |        |      |     |       |   |   |
|--------|-----------|-------|------------|-----------------|-------------------|-------------------|-----------------------|--------|------|-----|-------|---|---|
| OTU28  | DQ914681  | Fungi | Ascomycota | Sordariomycetes | Trichosphaeriales | Incertae          | <i>Nigrospora</i>     | 4E-51  | 202  | 162 | 92.59 | 3 | 3 |
| OTU142 | KJ608106  | Fungi | Ascomycota | Sordariomycetes | Trichosphaeriales | Incertae          | <i>Nigrospora</i>     | 4E-56  | 218  | 126 | 98.41 | 2 | 2 |
| OTU555 | NR_073338 | Fungi | Ascomycota | Sordariomycetes | Trichosphaeriales | Incertae          | <i>Nigrospora</i>     | 1E-28  | 127  | 118 | 90.68 | 3 | 5 |
| OTU747 | JX280781  | Fungi | Ascomycota | Sordariomycetes | Trichosphaeriales | Incertae          | <i>Nigrospora</i>     | 8E-86  | 317  | 160 | 100   | 0 | 0 |
| OTU47  | JQ825256  | Fungi | Ascomycota | Sordariomycetes | Trichosphaeriales | Incertae          | <i>Nigrospora</i>     | 1E-49  | 196  | 99  | 100   | 0 | 0 |
| OTU504 | KM063249  | Fungi | Ascomycota | Sordariomycetes | Trichosphaeriales | Incertae          | <i>Nigrospora</i>     | 1E-72  | 274  | 142 | 99.3  | 0 | 0 |
| OTU3   | EU686935  | Fungi | Ascomycota | Sordariomycetes | unidentified      | unidentified      | unidentified          | 3E-20  | 99.6 | 94  | 89.36 | 1 | 1 |
| OTU9   | EU686935  | Fungi | Ascomycota | Sordariomycetes | unidentified      | unidentified      | unidentified          | 3E-20  | 99.6 | 94  | 89.36 | 1 | 1 |
| OTU56  | KJ471524  | Fungi | Ascomycota | Sordariomycetes | unidentified      | unidentified      | unidentified          | 2E-80  | 299  | 155 | 99.35 | 0 | 0 |
| OTU272 | JN905220  | Fungi | Ascomycota | Sordariomycetes | unidentified      | unidentified      | unidentified          | 5E-40  | 165  | 115 | 93.04 | 0 | 0 |
| OTU73  | JX624261  | Fungi | Ascomycota | Sordariomycetes | unidentified      | unidentified      | unidentified          | 2E-68  | 260  | 135 | 99.26 | 0 | 0 |
| OTU15  | JX436244  | Fungi | Ascomycota | Sordariomycetes | unidentified      | unidentified      | unidentified          | 3E-73  | 276  | 167 | 97.6  | 3 | 3 |
| OTU128 | EF488417  | Fungi | Ascomycota | Sordariomycetes | unidentified      | unidentified      | unidentified          | 1E-88  | 327  | 181 | 98.34 | 1 | 1 |
| OTU174 | JN905220  | Fungi | Ascomycota | Sordariomycetes | unidentified      | unidentified      | unidentified          | 8E-39  | 161  | 117 | 94.02 | 2 | 2 |
| OTU456 | DQ530216  | Fungi | Ascomycota | Sordariomycetes | unidentified      | unidentified      | unidentified          | 4E-35  | 149  | 146 | 91.78 | 6 | 7 |
| OTU118 | UDB018208 | Fungi | Ascomycota | Sordariomycetes | unidentified      | unidentified      | unidentified          | 3E-123 | 442  | 239 | 98.74 | 1 | 1 |
| OTU238 | GU053830  | Fungi | Ascomycota | Sordariomycetes | Xylariales        | Amphisphaeriaceae | <i>Pestalotiopsis</i> | 1E-39  | 165  | 159 | 90.57 | 4 | 4 |
| OTU583 | UDB019703 | Fungi | Ascomycota | Sordariomycetes | Xylariales        | Diatrypaceae      | <i>Eutypa</i>         | 7E-103 | 375  | 237 | 96.62 | 4 | 4 |
| OTU244 | JX014309  | Fungi | Ascomycota | Sordariomycetes | Xylariales        | Diatrypaceae      | <i>Eutypa</i>         | 5E-48  | 192  | 101 | 99.01 | 0 | 0 |
| OTU530 | KJ869112  | Fungi | Ascomycota | Sordariomycetes | Xylariales        | Diatrypaceae      | <i>Eutypa</i>         | 2E-64  | 246  | 155 | 95.48 | 1 | 2 |
| OTU192 | JQ520177  | Fungi | Ascomycota | Sordariomycetes | Xylariales        | Diatrypaceae      | <i>Eutypa</i>         | 8E-99  | 361  | 194 | 98.97 | 1 | 1 |
| OTU57  | GQ999538  | Fungi | Ascomycota | Sordariomycetes | Xylariales        | Diatrypaceae      | <i>Eutypa</i>         | 4E-39  | 163  | 101 | 96.04 | 1 | 2 |
| OTU176 | JQ520177  | Fungi | Ascomycota | Sordariomycetes | Xylariales        | Diatrypaceae      | <i>Eutypa</i>         | 1E-88  | 327  | 204 | 97.06 | 4 | 5 |
| OTU419 | HM589327  | Fungi | Ascomycota | Sordariomycetes | Xylariales        | Diatrypaceae      | <i>Eutypa</i>         | 8E-80  | 297  | 162 | 98.77 | 1 | 1 |
| OTU388 | KM458799  | Fungi | Ascomycota | Sordariomycetes | Xylariales        | Diatrypaceae      | <i>Eutypa</i>         | 1E-91  | 337  | 178 | 99.44 | 1 | 1 |
| OTU27  | HE584882  | Fungi | Ascomycota | Sordariomycetes | Xylariales        | Diatrypaceae      | <i>Eutypa</i>         | 2E-30  | 133  | 141 | 90.07 | 5 | 7 |

---

|        |          |       |            |                 |            |              |                        |        |     |     |       |   |   |
|--------|----------|-------|------------|-----------------|------------|--------------|------------------------|--------|-----|-----|-------|---|---|
| OTU245 | AB615578 | Fungi | Ascomycota | Sordariomycetes | Xylariales | Diatrypaceae | <i>Eutypa</i>          | 3E-32  | 139 | 74  | 98.65 | 0 | 0 |
| OTU276 | AM749926 | Fungi | Ascomycota | Sordariomycetes | Xylariales | Diatrypaceae | <i>Eutypa</i>          | 3E-114 | 412 | 240 | 97.08 | 1 | 1 |
| OTU559 | AF492086 | Fungi | Ascomycota | Sordariomycetes | Xylariales | Diatrypaceae | <i>Eutypa</i>          | 7E-93  | 341 | 176 | 99.43 | 0 | 0 |
| OTU332 | JQ348934 | Fungi | Ascomycota | Sordariomycetes | Xylariales | Diatrypaceae | <i>Eutypa</i>          | 4E-85  | 315 | 183 | 98.36 | 3 | 3 |
| OTU252 | AB900869 | Fungi | Ascomycota | Sordariomycetes | Xylariales | Diatrypaceae | <i>Eutypa</i>          | 2E-73  | 276 | 139 | 100   | 0 | 0 |
| OTU373 | KF146177 | Fungi | Ascomycota | Sordariomycetes | Xylariales | Diatrypaceae | <i>Eutypella</i>       | 7E-90  | 331 | 203 | 97.54 | 4 | 4 |
| OTU324 | JF495181 | Fungi | Ascomycota | Sordariomycetes | Xylariales | Diatrypaceae | <i>Libertella</i>      | 7E-52  | 204 | 139 | 94.24 | 1 | 1 |
| OTU99  | KM527126 | Fungi | Ascomycota | Sordariomycetes | Xylariales | Diatrypaceae | <i>Libertella</i>      | 6E-65  | 248 | 141 | 98.58 | 2 | 2 |
| OTU537 | EF419902 | Fungi | Ascomycota | Sordariomycetes | Xylariales | Diatrypaceae | <i>Libertella</i>      | 2E-87  | 323 | 182 | 97.8  | 1 | 2 |
| OTU195 | AB255241 | Fungi | Ascomycota | Sordariomycetes | Xylariales | Diatrypaceae | <i>Libertella</i>      | 1E-66  | 254 | 136 | 99.26 | 1 | 1 |
| OTU72  | U65613   | Fungi | Ascomycota | Sordariomycetes | Xylariales | Diatrypaceae | <i>Libertella</i>      | 4E-69  | 262 | 140 | 98.57 | 0 | 0 |
| OTU319 | JQ936271 | Fungi | Ascomycota | Sordariomycetes | Xylariales | Diatrypaceae | <i>Libertella</i>      | 4E-91  | 335 | 192 | 97.92 | 2 | 3 |
| OTU29  | FJ770078 | Fungi | Ascomycota | Sordariomycetes | Xylariales | Diatrypaceae | <i>Libertella</i>      | 3E-23  | 109 | 139 | 86.33 | 2 | 2 |
| OTU25  | JN596348 | Fungi | Ascomycota | Sordariomycetes | Xylariales | Diatrypaceae | <i>Libertella</i>      | 7E-74  | 278 | 152 | 98.68 | 1 | 1 |
| OTU126 | KJ170305 | Fungi | Ascomycota | Sordariomycetes | Xylariales | Diatrypaceae | <i>Libertella</i>      | 5E-59  | 228 | 142 | 95.77 | 1 | 2 |
| OTU93  | KC857282 | Fungi | Ascomycota | Sordariomycetes | Xylariales | Diatrypaceae | <i>Libertella</i>      | 3E-70  | 266 | 154 | 98.05 | 2 | 2 |
| OTU536 | DQ682585 | Fungi | Ascomycota | Sordariomycetes | Xylariales | Diatrypaceae | unidentified           | 3E-57  | 222 | 131 | 97.71 | 2 | 3 |
| OTU494 | FJ776641 | Fungi | Ascomycota | Sordariomycetes | Xylariales | Diatrypaceae | unidentified           | 1E-81  | 303 | 157 | 99.36 | 0 | 0 |
| OTU341 | FJ627262 | Fungi | Ascomycota | Sordariomycetes | Xylariales | Diatrypaceae | unidentified           | 7E-87  | 321 | 198 | 96.46 | 2 | 2 |
| OTU425 | KF705019 | Fungi | Ascomycota | Sordariomycetes | Xylariales | Diatrypaceae | unidentified           | 2E-112 | 406 | 217 | 99.08 | 1 | 1 |
| OTU182 | AB693819 | Fungi | Ascomycota | Sordariomycetes | Xylariales | Incertae     | <i>Dinemasporium</i>   | 4E-110 | 398 | 209 | 99.04 | 0 | 0 |
| OTU498 | HQ846974 | Fungi | Ascomycota | Sordariomycetes | Xylariales | unidentified | unidentified           | 8E-115 | 414 | 236 | 97.46 | 1 | 2 |
| OTU296 | KJ957778 | Fungi | Ascomycota | Sordariomycetes | Xylariales | Xylariaceae  | <i>Annulohypoxylon</i> | 9E-61  | 234 | 150 | 97.33 | 4 | 4 |
| OTU484 | KM527126 | Fungi | Ascomycota | Sordariomycetes | Xylariales | Xylariaceae  | <i>Hypoxylon</i>       | 8E-55  | 214 | 139 | 94.96 | 1 | 2 |
| OTU46  | KP132554 | Fungi | Ascomycota | Sordariomycetes | Xylariales | Xylariaceae  | <i>Hypoxylon</i>       | 1E-66  | 254 | 176 | 94.32 | 2 | 2 |
| OTU141 | FJ917556 | Fungi | Ascomycota | Sordariomycetes | Xylariales | Xylariaceae  | <i>Hypoxylon</i>       | 8E-102 | 371 | 191 | 99.48 | 0 | 0 |

---

|        |          |       |               |                 |              |                 |                    |        |     |     |       |   |   |
|--------|----------|-------|---------------|-----------------|--------------|-----------------|--------------------|--------|-----|-----|-------|---|---|
| OTU469 | FJ596861 | Fungi | Ascomycota    | Sordariomycetes | Xylariales   | Xylariaceae     | <i>Hypoxylon</i>   | 1E-91  | 337 | 198 | 97.47 | 2 | 2 |
| OTU474 | JX162758 | Fungi | Ascomycota    | Sordariomycetes | Xylariales   | Xylariaceae     | <i>Hypoxylon</i>   | 1E-100 | 367 | 193 | 98.96 | 0 | 0 |
| OTU202 | HE584882 | Fungi | Ascomycota    | Sordariomycetes | Xylariales   | Xylariaceae     | <i>Hypoxylon</i>   | 3E-45  | 182 | 147 | 91.84 | 2 | 3 |
| OTU483 | KM457634 | Fungi | Ascomycota    | Sordariomycetes | Xylariales   | Xylariaceae     | <i>Hypoxylon</i>   | 1E-103 | 377 | 190 | 100   | 0 | 0 |
| OTU293 | KF212308 | Fungi | Ascomycota    | Sordariomycetes | Xylariales   | Xylariaceae     | <i>Hypoxylon</i>   | 1E-75  | 283 | 159 | 98.74 | 2 | 2 |
| OTU488 | AF191548 | Fungi | Ascomycota    | Sordariomycetes | Xylariales   | Xylariaceae     | <i>Hypoxylon</i>   | 1E-84  | 313 | 166 | 99.4  | 1 | 1 |
| OTU430 | GQ511904 | Fungi | Ascomycota    | Sordariomycetes | Xylariales   | Xylariaceae     | <i>Hypoxylon</i>   | 8E-42  | 170 | 114 | 94.74 | 1 | 1 |
| OTU137 | KM246204 | Fungi | Ascomycota    | Sordariomycetes | Xylariales   | Xylariaceae     | <i>Xylaria</i>     | 1E-69  | 264 | 148 | 97.97 | 1 | 2 |
| OTU437 | KF286985 | Fungi | Ascomycota    | Sordariomycetes | Xylariales   | Xylariaceae     | <i>Xylaria</i>     | 6E-25  | 115 | 122 | 89.34 | 3 | 3 |
| OTU467 | DQ914681 | Fungi | Ascomycota    | Sordariomycetes | Xylariales   | Xylariaceae     | <i>Xylaria</i>     | 2E-43  | 176 | 169 | 90.53 | 4 | 4 |
| OTU382 | HE584827 | Fungi | Ascomycota    | Sordariomycetes | Xylariales   | Xylariaceae     | <i>Xylaria</i>     | 3E-21  | 103 | 60  | 96.67 | 0 | 0 |
| OTU203 | HQ631032 | Fungi | Ascomycota    | Sordariomycetes | Xylariales   | Xylariaceae     | <i>Xylaria</i>     | 4E-69  | 262 | 156 | 96.79 | 1 | 1 |
| OTU91  | KC978007 | Fungi | Ascomycota    | Sordariomycetes | Xylariales   | Xylariaceae     | <i>Xylaria</i>     | 3E-86  | 319 | 220 | 94.55 | 3 | 4 |
| OTU36  | JX014309 | Fungi | Ascomycota    | Sordariomycetes | Xylariales   | Xylariaceae     | <i>Xylaria</i>     | 3E-108 | 392 | 226 | 97.79 | 2 | 2 |
| OTU59  | KC857282 | Fungi | Ascomycota    | Sordariomycetes | Xylariales   | Xylariaceae     | <i>Xylaria</i>     | 1E-69  | 264 | 153 | 97.39 | 1 | 1 |
| OTU50  | GQ999538 | Fungi | Ascomycota    | Sordariomycetes | Xylariales   | Xylariaceae     | <i>Xylaria</i>     | 2E-35  | 151 | 108 | 96.3  | 4 | 4 |
| OTU436 | KC978007 | Fungi | Ascomycota    | Sordariomycetes | Xylariales   | Xylariaceae     | <i>Xylaria</i>     | 8E-93  | 341 | 219 | 96.35 | 4 | 5 |
| OTU395 | KC491368 | Fungi | Ascomycota    | Taphrinomycetes | Taphrinales  | Taphrinaceae    | <i>Taphrina</i>    | 3E-74  | 280 | 225 | 92.44 | 4 | 4 |
| OTU575 | KF516949 | Fungi | Ascomycota    | unidentified    | unidentified | unidentified    | unidentified       | 4E-72  | 272 | 161 | 97.52 | 2 | 2 |
| OTU368 | KF212308 | Fungi | Ascomycota    | unidentified    | unidentified | unidentified    | unidentified       | 8E-74  | 278 | 168 | 97.02 | 2 | 2 |
| OTU652 | GQ999538 | Fungi | Basidiomycota | Agaricomycetes  | Agaricales   | Psathyrellaceae | <i>Coprinellus</i> | 7E-38  | 159 | 80  | 100   | 0 | 0 |
| OTU718 | KF212196 | Fungi | Basidiomycota | Agaricomycetes  | Agaricales   | Psathyrellaceae | <i>Coprinellus</i> | 6E-109 | 394 | 199 | 100   | 0 | 0 |
| OTU658 | HQ631017 | Fungi | Basidiomycota | Agaricomycetes  | Agaricales   | Psathyrellaceae | <i>Coprinopsis</i> | 1E-38  | 161 | 139 | 92.09 | 4 | 6 |
| OTU654 | HE584827 | Fungi | Basidiomycota | Agaricomycetes  | Agaricales   | Psathyrellaceae | <i>Coprinopsis</i> | 2E-22  | 107 | 164 | 86.59 | 6 | 8 |
| OTU622 | JX317505 | Fungi | Basidiomycota | Agaricomycetes  | Agaricales   | Psathyrellaceae | <i>Psathyrella</i> | 1E-22  | 107 | 113 | 89.38 | 3 | 4 |
| OTU589 | FJ820729 | Fungi | Basidiomycota | Agaricomycetes  | Agaricales   | Strophariaceae  | <i>Hypholoma</i>   | 4E-57  | 222 | 169 | 93.49 | 4 | 7 |



---

|        |          |       |               |                |             |                 |                     |        |     |     |       |   |   |
|--------|----------|-------|---------------|----------------|-------------|-----------------|---------------------|--------|-----|-----|-------|---|---|
| OTU629 | KC978007 | Fungi | Basidiomycota | Agaricomycetes | Agaricales  | Strophariaceae  | <i>Hypholoma</i>    | 1E-107 | 391 | 221 | 98.64 | 3 | 3 |
| OTU645 | AF443929 | Fungi | Basidiomycota | Agaricomycetes | Agaricales  | Strophariaceae  | <i>Psilocybe</i>    | 2E-96  | 353 | 209 | 97.61 | 3 | 4 |
| OTU671 | KC191577 | Fungi | Basidiomycota | Agaricomycetes | Agaricales  | Strophariaceae  | <i>Stropharia</i>   | 1E-32  | 141 | 178 | 87.64 | 5 | 6 |
| OTU676 | KF222008 | Fungi | Basidiomycota | Agaricomycetes | Agaricales  | Strophariaceae  | <i>Stropharia</i>   | 5E-22  | 105 | 53  | 100   | 0 | 0 |
| OTU667 | JX966555 | Fungi | Basidiomycota | Agaricomycetes | Agaricales  | Strophariaceae  | <i>Stropharia</i>   | 6E-69  | 262 | 199 | 93.47 | 4 | 5 |
| OTU640 | AB218068 | Fungi | Basidiomycota | Agaricomycetes | Boletales   | Rhizopogonaceae | <i>Rhizopogon</i>   | 6E-90  | 331 | 179 | 98.88 | 1 | 1 |
| OTU587 | EU035415 | Fungi | Basidiomycota | Agaricomycetes | Boletales   | Rhizopogonaceae | <i>Rhizopogon</i>   | 1E-60  | 234 | 198 | 91.41 | 4 | 8 |
| OTU700 | HM437870 | Fungi | Basidiomycota | Agaricomycetes | Corticiales | Corticaceae     | <i>Limonomyces</i>  | 1E-84  | 313 | 158 | 100   | 0 | 0 |
| OTU687 | AF324170 | Fungi | Basidiomycota | Agaricomycetes | Phallales   | Phallaceae      | <i>Phallus</i>      | 4E-54  | 212 | 146 | 95.21 | 3 | 4 |
| OTU709 | JX162767 | Fungi | Basidiomycota | Agaricomycetes | Polyporales | Ganodermataceae | <i>Ganoderma</i>    | 4E-88  | 325 | 200 | 96.5  | 2 | 2 |
| OTU577 | KF984795 | Fungi | Basidiomycota | Agaricomycetes | Polyporales | Ganodermataceae | <i>Ganoderma</i>    | 7E-96  | 351 | 181 | 99.45 | 0 | 0 |
| OTU613 | GU366712 | Fungi | Basidiomycota | Agaricomycetes | Polyporales | Ganodermataceae | <i>Ganoderma</i>    | 1E-81  | 303 | 153 | 100   | 0 | 0 |
| OTU635 | KM111293 | Fungi | Basidiomycota | Agaricomycetes | Polyporales | Ganodermataceae | <i>Ganoderma</i>    | 1E-66  | 254 | 189 | 93.12 | 3 | 6 |
| OTU625 | JX624261 | Fungi | Basidiomycota | Agaricomycetes | Polyporales | Ganodermataceae | <i>Ganoderma</i>    | 2E-49  | 196 | 150 | 93.33 | 3 | 4 |
| OTU572 | JX014309 | Fungi | Basidiomycota | Agaricomycetes | Polyporales | Ganodermataceae | <i>Ganoderma</i>    | 6E-97  | 355 | 203 | 98.03 | 2 | 2 |
| OTU580 | KM246756 | Fungi | Basidiomycota | Agaricomycetes | Polyporales | Ganodermataceae | <i>Ganoderma</i>    | 1E-78  | 293 | 179 | 97.21 | 3 | 4 |
| OTU592 | JF945479 | Fungi | Basidiomycota | Agaricomycetes | Polyporales | Ganodermataceae | <i>Ganoderma</i>    | 8E-37  | 155 | 173 | 87.86 | 3 | 4 |
| OTU593 | JN906117 | Fungi | Basidiomycota | Agaricomycetes | Polyporales | Ganodermataceae | <i>Ganoderma</i>    | 1E-62  | 240 | 145 | 97.93 | 3 | 3 |
| OTU646 | DQ068346 | Fungi | Basidiomycota | Agaricomycetes | Polyporales | Ganodermataceae | <i>Ganoderma</i>    | 2E-40  | 167 | 92  | 97.83 | 0 | 0 |
| OTU637 | KM265670 | Fungi | Basidiomycota | Agaricomycetes | Polyporales | Ganodermataceae | <i>Ganoderma</i>    | 9E-61  | 234 | 142 | 96.48 | 1 | 1 |
| OTU633 | KM016925 | Fungi | Basidiomycota | Agaricomycetes | Polyporales | Ganodermataceae | <i>Ganoderma</i>    | 4E-75  | 281 | 150 | 99.33 | 1 | 1 |
| OTU627 | KC478551 | Fungi | Basidiomycota | Agaricomycetes | Polyporales | Ganodermataceae | <i>Ganoderma</i>    | 1E-72  | 274 | 142 | 99.3  | 0 | 0 |
| OTU706 | JQ520177 | Fungi | Basidiomycota | Agaricomycetes | Polyporales | Ganodermataceae | <i>Ganoderma</i>    | 8E-102 | 371 | 195 | 99.49 | 1 | 1 |
| OTU342 | FJ972957 | Fungi | Basidiomycota | Agaricomycetes | Polyporales | Polyporaceae    | <i>Perenniporia</i> | 1E-78  | 293 | 164 | 98.17 | 1 | 1 |
| OTU394 | JX014309 | Fungi | Basidiomycota | Agaricomycetes | Polyporales | Polyporaceae    | <i>Perenniporia</i> | 8E-90  | 331 | 225 | 94.67 | 3 | 5 |
| OTU205 | FJ820729 | Fungi | Basidiomycota | Agaricomycetes | Polyporales | Polyporaceae    | <i>Perenniporia</i> | 6E-56  | 218 | 166 | 94.58 | 5 | 5 |

---

|        |           |       |               |                      |                   |                    |                        |        |      |     |       |   |    |
|--------|-----------|-------|---------------|----------------------|-------------------|--------------------|------------------------|--------|------|-----|-------|---|----|
| OTU7   | FJ627262  | Fungi | Basidiomycota | Agaricomycetes       | Polyporales       | Polyporaceae       | <i>Perenniporia</i>    | 1E-79  | 297  | 202 | 95.54 | 4 | 4  |
| OTU383 | JN905220  | Fungi | Basidiomycota | Agaricomycetes       | Polyporales       | Polyporaceae       | <i>Perenniporia</i>    | 2E-33  | 143  | 116 | 92.24 | 2 | 2  |
| OTU343 | JX043185  | Fungi | Basidiomycota | Agaricomycetes       | Polyporales       | Polyporaceae       | <i>Perenniporia</i>    | 7E-28  | 125  | 134 | 88.06 | 2 | 3  |
| OTU78  | KF212308  | Fungi | Basidiomycota | Agaricomycetes       | Polyporales       | Polyporaceae       | <i>Perenniporia</i>    | 2E-86  | 319  | 165 | 99.39 | 0 | 0  |
| OTU539 | EU035415  | Fungi | Basidiomycota | Agaricomycetes       | Polyporales       | Polyporaceae       | <i>Perenniporia</i>    | 3E-55  | 216  | 196 | 90.82 | 5 | 10 |
| OTU248 | HQ631032  | Fungi | Basidiomycota | Agaricomycetes       | Polyporales       | Polyporaceae       | <i>Perenniporia</i>    | 3E-73  | 276  | 158 | 98.1  | 2 | 3  |
| OTU540 | FJ627262  | Fungi | Basidiomycota | Agaricomycetes       | Polyporales       | Polyporaceae       | <i>Perenniporia</i>    | 1E-82  | 307  | 202 | 95.54 | 3 | 4  |
| OTU378 | AF444483  | Fungi | Basidiomycota | Agaricomycetes       | Polyporales       | Polyporaceae       | <i>Perenniporia</i>    | 2E-20  | 99.6 | 74  | 93.24 | 1 | 1  |
| OTU179 | KF916572  | Fungi | Basidiomycota | Agaricomycetes       | Polyporales       | Polyporaceae       | <i>Perenniporia</i>    | 3E-50  | 198  | 108 | 99.07 | 1 | 1  |
| OTU240 | EU686935  | Fungi | Basidiomycota | Agaricomycetes       | Polyporales       | Polyporaceae       | <i>Perenniporia</i>    | 1E-22  | 107  | 94  | 90.43 | 1 | 1  |
| OTU5   | FJ627262  | Fungi | Basidiomycota | Agaricomycetes       | Polyporales       | Polyporaceae       | <i>Perenniporia</i>    | 8E-99  | 361  | 202 | 98.51 | 2 | 2  |
| OTU226 | JQ418381  | Fungi | Basidiomycota | Agaricomycetes       | Russulales        | Peniophoraceae     | <i>Peniophora</i>      | 1E-50  | 200  | 137 | 94.89 | 2 | 2  |
| OTU681 | KJ572145  | Fungi | Basidiomycota | Agaricomycetes       | Russulales        | unidentified       | unidentified           | 4E-75  | 281  | 142 | 100   | 0 | 0  |
| OTU683 | KM246756  | Fungi | Basidiomycota | Agaricomycetes       | Sebacinales       | Sebacinaceae       | <i>Sebacina</i>        | 5E-75  | 281  | 181 | 96.13 | 3 | 4  |
| OTU675 | KC978007  | Fungi | Basidiomycota | Agaricomycetes       | Sebacinales       | Sebacinaceae       | <i>Sebacina</i>        | 4E-104 | 379  | 219 | 97.26 | 1 | 1  |
| OTU615 | HM992800  | Fungi | Basidiomycota | Agaricomycetes       | Trechisporales    | Hydnodontaceae     | <i>Trechispora</i>     | 2E-66  | 254  | 178 | 94.38 | 3 | 5  |
| OTU603 | KP131527  | Fungi | Basidiomycota | Agaricomycetes       | Trechisporales    | Hydnodontaceae     | unidentified           | 1E-75  | 283  | 167 | 98.2  | 3 | 3  |
| OTU712 | JX974764  | Fungi | Basidiomycota | Agaricomycetes       | unidentified      | unidentified       | unidentified           | 9E-23  | 107  | 81  | 92.59 | 1 | 2  |
| OTU648 | EU686935  | Fungi | Basidiomycota | Agaricomycetes       | unidentified      | unidentified       | unidentified           | 1E-22  | 107  | 94  | 90.43 | 1 | 1  |
| OTU665 | JX624261  | Fungi | Basidiomycota | Agaricostilbomycetes | Agaricostilbales  | Agaricostilbaceae  | <i>Bensingtonia</i>    | 8E-55  | 214  | 149 | 93.96 | 2 | 5  |
| OTU685 | KP132554  | Fungi | Basidiomycota | Cystobasidiomycetes  | Cystobasidiales   | Cystobasidiaceae   | <i>Occultifur</i>      | 2E-96  | 353  | 194 | 98.97 | 2 | 2  |
| OTU586 | AB998278  | Fungi | Basidiomycota | Cystobasidiomycetes  | Cystobasidiales   | Cystobasidiaceae   | <i>Occultifur</i>      | 1E-75  | 283  | 154 | 98.7  | 1 | 2  |
| OTU566 | GQ999538  | Fungi | Basidiomycota | Cystobasidiomycetes  | Erythrobasidiales | Erythrobasidiaceae | <i>Erythrobasidium</i> | 5E-48  | 192  | 101 | 99.01 | 0 | 0  |
| OTU620 | JQ905732  | Fungi | Basidiomycota | Cystobasidiomycetes  | Erythrobasidiales | Erythrobasidiaceae | <i>Erythrobasidium</i> | 2E-61  | 236  | 139 | 97.84 | 2 | 2  |
| OTU639 | NR_073218 | Fungi | Basidiomycota | Cystobasidiomycetes  | Erythrobasidiales | Erythrobasidiaceae | <i>Erythrobasidium</i> | 3E-47  | 188  | 103 | 98.06 | 0 | 0  |
| OTU663 | JX014309  | Fungi | Basidiomycota | Cystobasidiomycetes  | Erythrobasidiales | Erythrobasidiaceae | <i>Erythrobasidium</i> | 2E-81  | 303  | 157 | 99.36 | 0 | 0  |

|        |          |       |               |                     |                   |                    |                        |        |      |     |       |   |    |
|--------|----------|-------|---------------|---------------------|-------------------|--------------------|------------------------|--------|------|-----|-------|---|----|
| OTU601 | KM063240 | Fungi | Basidiomycota | Cystobasidiomycetes | Erythrobasidiales | Erythrobasidiaceae | <i>Erythrobasidium</i> | 5E-57  | 222  | 207 | 92.75 | 9 | 10 |
| OTU668 | JX978429 | Fungi | Basidiomycota | Cystobasidiomycetes | Erythrobasidiales | Erythrobasidiaceae | <i>Erythrobasidium</i> | 1E-54  | 214  | 175 | 92    | 3 | 4  |
| OTU651 | GQ999325 | Fungi | Basidiomycota | Cystobasidiomycetes | Erythrobasidiales | Erythrobasidiaceae | <i>Erythrobasidium</i> | 3E-92  | 339  | 187 | 98.93 | 2 | 2  |
| OTU611 | GQ999538 | Fungi | Basidiomycota | Cystobasidiomycetes | Erythrobasidiales | Erythrobasidiaceae | <i>Erythrobasidium</i> | 7E-38  | 159  | 80  | 100   | 0 | 0  |
| OTU696 | GQ518230 | Fungi | Basidiomycota | Cystobasidiomycetes | Erythrobasidiales | Erythrobasidiaceae | <i>Erythrobasidium</i> | 3E-29  | 129  | 124 | 90.32 | 3 | 4  |
| OTU634 | KM103661 | Fungi | Basidiomycota | Cystobasidiomycetes | Erythrobasidiales | Erythrobasidiaceae | <i>Erythrobasidium</i> | 7E-77  | 287  | 153 | 98.69 | 0 | 0  |
| OTU576 | KF800162 | Fungi | Basidiomycota | Cystobasidiomycetes | Erythrobasidiales | Erythrobasidiaceae | <i>Erythrobasidium</i> | 2E-103 | 377  | 190 | 100   | 0 | 0  |
| OTU692 | EF419971 | Fungi | Basidiomycota | Cystobasidiomycetes | Erythrobasidiales | Erythrobasidiaceae | <i>Erythrobasidium</i> | 4E-69  | 262  | 144 | 97.92 | 0 | 0  |
| OTU585 | AB255241 | Fungi | Basidiomycota | Cystobasidiomycetes | Erythrobasidiales | Erythrobasidiaceae | <i>Erythrobasidium</i> | 9E-58  | 224  | 137 | 97.81 | 3 | 3  |
| OTU595 | KF143787 | Fungi | Basidiomycota | Cystobasidiomycetes | Erythrobasidiales | Erythrobasidiaceae | <i>Erythrobasidium</i> | 5E-94  | 345  | 194 | 98.45 | 2 | 2  |
| OTU684 | KP099830 | Fungi | Basidiomycota | Cystobasidiomycetes | Erythrobasidiales | Erythrobasidiaceae | <i>Erythrobasidium</i> | 6E-20  | 99.6 | 58  | 96.55 | 0 | 0  |
| OTU643 | AB693792 | Fungi | Basidiomycota | Cystobasidiomycetes | Erythrobasidiales | Erythrobasidiaceae | <i>Erythrobasidium</i> | 3E-63  | 242  | 134 | 98.51 | 1 | 1  |
| OTU672 | KC354795 | Fungi | Basidiomycota | Cystobasidiomycetes | Erythrobasidiales | Erythrobasidiaceae | <i>Erythrobasidium</i> | 2E-46  | 186  | 147 | 92.52 | 3 | 6  |
| OTU699 | HE584827 | Fungi | Basidiomycota | Cystobasidiomycetes | Erythrobasidiales | Erythrobasidiaceae | <i>Erythrobasidium</i> | 3E-30  | 133  | 173 | 87.28 | 5 | 7  |
| OTU666 | JX898596 | Fungi | Basidiomycota | Cystobasidiomycetes | Erythrobasidiales | Erythrobasidiaceae | <i>Erythrobasidium</i> | 5E-75  | 281  | 170 | 95.88 | 0 | 0  |
| OTU703 | JN205932 | Fungi | Basidiomycota | Cystobasidiomycetes | Erythrobasidiales | Erythrobasidiaceae | <i>Erythrobasidium</i> | 1E-107 | 391  | 209 | 99.04 | 1 | 1  |
| OTU579 | KJ572145 | Fungi | Basidiomycota | Cystobasidiomycetes | Erythrobasidiales | Erythrobasidiaceae | <i>Erythrobasidium</i> | 4E-69  | 262  | 144 | 98.61 | 1 | 1  |
| OTU679 | KF675509 | Fungi | Basidiomycota | Cystobasidiomycetes | Erythrobasidiales | Erythrobasidiaceae | <i>Erythrobasidium</i> | 9E-61  | 234  | 146 | 95.89 | 1 | 1  |
| OTU628 | KC753419 | Fungi | Basidiomycota | Cystobasidiomycetes | Erythrobasidiales | unidentified       | unidentified           | 4E-44  | 178  | 142 | 92.25 | 2 | 2  |
| OTU653 | GU214635 | Fungi | Basidiomycota | Cystobasidiomycetes | Erythrobasidiales | unidentified       | unidentified           | 4E-35  | 149  | 135 | 91.11 | 3 | 3  |
| OTU644 | AF314984 | Fungi | Basidiomycota | Microbotryomycetes  | Sporidiobolales   | Incertae           | <i>Rhodotorula</i>     | 2E-87  | 323  | 186 | 97.85 | 2 | 3  |
| OTU647 | DQ530216 | Fungi | Basidiomycota | Microbotryomycetes  | Sporidiobolales   | Incertae           | <i>Rhodotorula</i>     | 2E-31  | 137  | 145 | 91.72 | 7 | 7  |
| OTU590 | GU214635 | Fungi | Basidiomycota | Microbotryomycetes  | Sporidiobolales   | Incertae           | <i>Rhodotorula</i>     | 1E-22  | 107  | 144 | 86.81 | 4 | 6  |
| OTU612 | GU214635 | Fungi | Basidiomycota | Microbotryomycetes  | Sporidiobolales   | Incertae           | <i>Rhodotorula</i>     | 3E-36  | 153  | 136 | 91.18 | 3 | 4  |
| OTU624 | JX624261 | Fungi | Basidiomycota | Microbotryomycetes  | Sporidiobolales   | Incertae           | <i>Rhodotorula</i>     | 3E-70  | 266  | 142 | 99.3  | 1 | 1  |
| OTU686 | KP132554 | Fungi | Basidiomycota | Microbotryomycetes  | Sporidiobolales   | Incertae           | <i>Rhodotorula</i>     | 2E-80  | 299  | 175 | 96.57 | 0 | 0  |

|        |           |       |               |                    |                     |                      |                       |       |     |     |       |   |   |
|--------|-----------|-------|---------------|--------------------|---------------------|----------------------|-----------------------|-------|-----|-----|-------|---|---|
| OTU678 | KF293978  | Fungi | Basidiomycota | Microbotryomycetes | Sporidiobolales     | Incertae             | <i>Rhodotorula</i>    | 2E-68 | 260 | 143 | 98.6  | 1 | 1 |
| OTU799 | KC455241  | Fungi | Basidiomycota | Microbotryomycetes | Sporidiobolales     | Incertae             | <i>Rhodotorula</i>    | 5E-60 | 232 | 185 | 92.43 | 4 | 8 |
| OTU605 | UDB015716 | Fungi | Basidiomycota | Microbotryomycetes | Sporidiobolales     | Incertae             | <i>Rhodotorula</i>    | 1E-85 | 317 | 244 | 93.44 | 5 | 5 |
| OTU602 | KM248556  | Fungi | Basidiomycota | Microbotryomycetes | Sporidiobolales     | Incertae             | <i>Rhodotorula</i>    | 2E-55 | 216 | 136 | 95.59 | 1 | 2 |
| OTU621 | JX268524  | Fungi | Basidiomycota | Microbotryomycetes | Sporidiobolales     | Incertae             | <i>Rhodotorula</i>    | 2E-71 | 270 | 176 | 96.59 | 4 | 4 |
| OTU649 | FJ969800  | Fungi | Basidiomycota | Microbotryomycetes | Sporidiobolales     | Incertae             | <i>Rhodotorula</i>    | 5E-32 | 139 | 156 | 89.1  | 5 | 7 |
| OTU720 | KF901810  | Fungi | Basidiomycota | Microbotryomycetes | Sporidiobolales     | Incertae             | <i>Rhodotorula</i>    | 8E-49 | 194 | 150 | 92.67 | 2 | 2 |
| OTU670 | KC182055  | Fungi | Basidiomycota | Microbotryomycetes | Sporidiobolales     | Incertae             | <i>Rhodotorula</i>    | 1E-57 | 224 | 161 | 96.27 | 6 | 6 |
| OTU574 | KC525844  | Fungi | Basidiomycota | Microbotryomycetes | Sporidiobolales     | Incertae             | <i>Rhodotorula</i>    | 2E-74 | 280 | 141 | 100   | 0 | 0 |
| OTU591 | HE584882  | Fungi | Basidiomycota | Microbotryomycetes | Sporidiobolales     | Incertae             | <i>Rhodotorula</i>    | 7E-40 | 165 | 126 | 93.65 | 3 | 4 |
| OTU655 | HE998744  | Fungi | Basidiomycota | Microbotryomycetes | Sporidiobolales     | Incertae             | <i>Rhodotorula</i>    | 8E-49 | 194 | 152 | 92.11 | 2 | 4 |
| OTU659 | HQ914866  | Fungi | Basidiomycota | Microbotryomycetes | Sporidiobolales     | Incertae             | <i>Sporobolomyces</i> | 3E-54 | 212 | 135 | 96.3  | 2 | 2 |
| OTU669 | JX998699  | Fungi | Basidiomycota | Microbotryomycetes | Sporidiobolales     | Incertae             | <i>Sporobolomyces</i> | 5E-50 | 198 | 147 | 93.2  | 2 | 3 |
| OTU702 | JF718366  | Fungi | Basidiomycota | Microbotryomycetes | Sporidiobolales     | Incertae             | <i>Sporobolomyces</i> | 4E-88 | 325 | 172 | 99.42 | 1 | 1 |
| OTU616 | HM992800  | Fungi | Basidiomycota | Microbotryomycetes | Sporidiobolales     | Incertae             | <i>Sporobolomyces</i> | 5E-88 | 325 | 203 | 96.06 | 2 | 3 |
| OTU708 | JQ906769  | Fungi | Basidiomycota | Pucciniomycetes    | Septobasidiales     | Septobasidiaceae     | unidentified          | 5E-29 | 129 | 85  | 94.12 | 0 | 0 |
| OTU726 | U65610    | Fungi | Basidiomycota | Pucciniomycetes    | Septobasidiales     | Septobasidiaceae     | unidentified          | 3E-32 | 139 | 127 | 92.13 | 5 | 8 |
| OTU739 | GQ999538  | Fungi | Basidiomycota | Tremellomycetes    | Cystofilobasidiales | Cystofilobasidiaceae | <i>Guehomyces</i>     | 1E-51 | 204 | 103 | 100   | 0 | 0 |
| OTU695 | FJ438386  | Fungi | Basidiomycota | Tremellomycetes    | Cystofilobasidiales | Cystofilobasidiaceae | <i>Mrakia</i>         | 8E-90 | 331 | 218 | 96.33 | 5 | 6 |
| OTU619 | JN890113  | Fungi | Basidiomycota | Tremellomycetes    | Tremellales         | Cuniculitremaeae     | <i>Fellomyces</i>     | 9E-21 | 101 | 138 | 86.96 | 4 | 4 |
| OTU661 | JQ009310  | Fungi | Basidiomycota | Tremellomycetes    | Tremellales         | Cuniculitremaeae     | <i>Fellomyces</i>     | 1E-35 | 151 | 88  | 96.59 | 0 | 0 |
| OTU673 | KC857282  | Fungi | Basidiomycota | Tremellomycetes    | Tremellales         | Cuniculitremaeae     | <i>Fellomyces</i>     | 8E-49 | 194 | 155 | 92.26 | 3 | 6 |
| OTU725 | NR_073259 | Fungi | Basidiomycota | Tremellomycetes    | Tremellales         | Cuniculitremaeae     | <i>Fellomyces</i>     | 7E-27 | 121 | 97  | 91.75 | 1 | 1 |
| OTU707 | JQ747716  | Fungi | Basidiomycota | Tremellomycetes    | Tremellales         | Cuniculitremaeae     | unidentified          | 2E-90 | 333 | 180 | 98.33 | 0 | 0 |
| OTU689 | DQ322127  | Fungi | Basidiomycota | Tremellomycetes    | Tremellales         | Cuniculitremaeae     | unidentified          | 7E-38 | 159 | 92  | 97.83 | 1 | 1 |
| OTU694 | EU707864  | Fungi | Basidiomycota | Tremellomycetes    | Tremellales         | Cuniculitremaeae     | unidentified          | 4E-29 | 129 | 125 | 89.6  | 2 | 2 |

---

|        |          |       |               |                 |             |                  |                     |        |      |     |       |   |   |
|--------|----------|-------|---------------|-----------------|-------------|------------------|---------------------|--------|------|-----|-------|---|---|
| OTU656 | HG004557 | Fungi | Basidiomycota | Tremellomycetes | Tremellales | Cuniculitremaeae | unidentified        | 4E-78  | 291  | 147 | 100   | 0 | 0 |
| OTU704 | JN942309 | Fungi | Basidiomycota | Tremellomycetes | Tremellales | Incertae         | <i>Derxomyces</i>   | 2E-93  | 343  | 181 | 99.45 | 1 | 1 |
| OTU604 | KP132440 | Fungi | Basidiomycota | Tremellomycetes | Tremellales | Incertae         | <i>Hannaella</i>    | 2E-90  | 333  | 192 | 98.44 | 3 | 3 |
| OTU618 | JF945479 | Fungi | Basidiomycota | Tremellomycetes | Tremellales | Incertae         | <i>Hannaella</i>    | 7E-28  | 125  | 177 | 85.88 | 4 | 6 |
| OTU650 | FN548160 | Fungi | Basidiomycota | Tremellomycetes | Tremellales | Incertae         | <i>Hannaella</i>    | 4E-20  | 99.6 | 90  | 92.22 | 3 | 3 |
| OTU594 | JX998699 | Fungi | Basidiomycota | Tremellomycetes | Tremellales | Incertae         | <i>Hannaella</i>    | 2E-43  | 176  | 145 | 92.41 | 3 | 3 |
| OTU570 | JF502456 | Fungi | Basidiomycota | Tremellomycetes | Tremellales | Incertae         | <i>Hannaella</i>    | 1E-56  | 220  | 139 | 95.68 | 1 | 1 |
| OTU598 | KJ706359 | Fungi | Basidiomycota | Tremellomycetes | Tremellales | Incertae         | <i>Hannaella</i>    | 6E-71  | 268  | 143 | 99.3  | 1 | 1 |
| OTU698 | GU721275 | Fungi | Basidiomycota | Tremellomycetes | Tremellales | Incertae         | <i>Hannaella</i>    | 2E-54  | 212  | 107 | 100   | 0 | 0 |
| OTU606 | AM901803 | Fungi | Basidiomycota | Tremellomycetes | Tremellales | Incertae         |                     | 2E-68  | 260  | 143 | 97.9  | 0 | 0 |
| OTU636 | KM246756 | Fungi | Basidiomycota | Tremellomycetes | Tremellales | Incertae         |                     | 1E-84  | 313  | 166 | 99.4  | 1 | 1 |
| OTU638 | KP132554 | Fungi | Basidiomycota | Tremellomycetes | Tremellales | Incertae         |                     | 2E-74  | 280  | 177 | 96.05 | 2 | 2 |
| OTU578 | KJ082097 | Fungi | Basidiomycota | Tremellomycetes | Tremellales | Tremellaceae     | <i>Bullera</i>      | 1E-78  | 293  | 156 | 98.72 | 0 | 0 |
| OTU600 | KM051384 | Fungi | Basidiomycota | Tremellomycetes | Tremellales | Tremellaceae     | <i>Bullera</i>      | 8E-77  | 287  | 165 | 96.97 | 0 | 0 |
| OTU569 | HQ631022 | Fungi | Basidiomycota | Tremellomycetes | Tremellales | Tremellaceae     | <i>Bullera</i>      | 5E-100 | 365  | 200 | 98.5  | 1 | 1 |
| OTU677 | KF286985 | Fungi | Basidiomycota | Tremellomycetes | Tremellales | Tremellaceae     | <i>Bullera</i>      | 4E-20  | 99.6 | 126 | 88.1  | 4 | 4 |
| OTU688 | AF325173 | Fungi | Basidiomycota | Tremellomycetes | Tremellales | Tremellaceae     | <i>Bullera</i>      | 9E-48  | 190  | 104 | 98.08 | 0 | 0 |
| OTU610 | GQ999538 | Fungi | Basidiomycota | Tremellomycetes | Tremellales | Tremellaceae     | <i>Bullera</i>      | 8E-44  | 178  | 98  | 98.98 | 1 | 1 |
| OTU614 | HE774495 | Fungi | Basidiomycota | Tremellomycetes | Tremellales | Tremellaceae     | <i>Bullera</i>      | 1E-116 | 420  | 216 | 99.54 | 0 | 0 |
| OTU680 | KJ028784 | Fungi | Basidiomycota | Tremellomycetes | Tremellales | Tremellaceae     | <i>Bullera</i>      | 1E-113 | 410  | 247 | 97.57 | 4 | 4 |
| OTU682 | KM246204 | Fungi | Basidiomycota | Tremellomycetes | Tremellales | Tremellaceae     | <i>Bullera</i>      | 2E-55  | 216  | 141 | 95.04 | 1 | 1 |
| OTU664 | JX014309 | Fungi | Basidiomycota | Tremellomycetes | Tremellales | Tremellaceae     | <i>Cryptococcus</i> | 1E-94  | 347  | 202 | 97.52 | 2 | 3 |
| OTU660 | JQ009310 | Fungi | Basidiomycota | Tremellomycetes | Tremellales | Tremellaceae     | <i>Cryptococcus</i> | 1E-35  | 151  | 88  | 96.59 | 0 | 0 |
| OTU607 | DQ914681 | Fungi | Basidiomycota | Tremellomycetes | Tremellales | Tremellaceae     | <i>Cryptococcus</i> | 5E-41  | 168  | 169 | 89.94 | 4 | 4 |
| OTU657 | HQ154258 | Fungi | Basidiomycota | Tremellomycetes | Tremellales | Tremellaceae     | <i>Cryptococcus</i> | 9E-83  | 307  | 179 | 96.65 | 0 | 0 |
| OTU630 | KJ186952 | Fungi | Basidiomycota | Tremellomycetes | Tremellales | Tremellaceae     | <i>Cryptococcus</i> | 4E-69  | 262  | 140 | 99.29 | 1 | 1 |

---

---

|        |           |       |               |                 |             |              |                       |        |     |     |       |    |    |
|--------|-----------|-------|---------------|-----------------|-------------|--------------|-----------------------|--------|-----|-----|-------|----|----|
| OTU701 | HM487014  | Fungi | Basidiomycota | Tremellomycetes | Tremellales | Tremellaceae | <i>Cryptococcus</i>   | 3E-36  | 153 | 144 | 92.36 | 6  | 7  |
| OTU588 | FJ810799  | Fungi | Basidiomycota | Tremellomycetes | Tremellales | Tremellaceae | <i>Cryptococcus</i>   | 9E-83  | 307 | 171 | 98.25 | 1  | 1  |
| OTU608 | GQ511904  | Fungi | Basidiomycota | Tremellomycetes | Tremellales | Tremellaceae | <i>Cryptococcus</i>   | 3E-29  | 129 | 115 | 92.17 | 4  | 6  |
| OTU674 | KC858999  | Fungi | Basidiomycota | Tremellomycetes | Tremellales | Tremellaceae | <i>Cryptococcus</i>   | 4E-32  | 139 | 94  | 94.68 | 1  | 1  |
| OTU617 | HM992800  | Fungi | Basidiomycota | Tremellomycetes | Tremellales | Tremellaceae | <i>Cryptococcus</i>   | 2E-109 | 396 | 228 | 98.25 | 3  | 3  |
| OTU597 | KJ619990  | Fungi | Basidiomycota | Tremellomycetes | Tremellales | Tremellaceae | <i>Cryptococcus</i>   | 1E-97  | 357 | 184 | 99.46 | 0  | 0  |
| OTU642 | AB255305  | Fungi | Basidiomycota | Tremellomycetes | Tremellales | Tremellaceae | <i>Cryptococcus</i>   | 7E-46  | 184 | 129 | 95.35 | 3  | 3  |
| OTU641 | AB255277  | Fungi | Basidiomycota | Tremellomycetes | Tremellales | Tremellaceae | <i>Cryptococcus</i>   | 9E-64  | 244 | 150 | 97.33 | 3  | 4  |
| OTU724 | NR_073218 | Fungi | Basidiomycota | Tremellomycetes | Tremellales | Tremellaceae | <i>Cryptococcus</i>   | 1E-49  | 196 | 103 | 99.03 | 0  | 0  |
| OTU609 | GQ522634  | Fungi | Basidiomycota | Tremellomycetes | Tremellales | Tremellaceae | <i>Cryptococcus</i>   | 2E-118 | 426 | 247 | 96.76 | 0  | 0  |
| OTU599 | KM013444  | Fungi | Basidiomycota | Tremellomycetes | Tremellales | Tremellaceae | <i>Cryptococcus</i>   | 1E-28  | 127 | 64  | 100   | 0  | 0  |
| OTU705 | JQ009308  | Fungi | Basidiomycota | Tremellomycetes | Tremellales | Tremellaceae | <i>Cryptococcus</i>   | 2E-118 | 426 | 231 | 98.7  | 1  | 1  |
| OTU626 | KC354795  | Fungi | Basidiomycota | Tremellomycetes | Tremellales | Tremellaceae | <i>Cryptococcus</i>   | 9E-58  | 224 | 149 | 95.3  | 2  | 2  |
| OTU631 | KJ775456  | Fungi | Basidiomycota | Tremellomycetes | Tremellales | Tremellaceae | <i>Dioszegia</i>      | 5E-78  | 291 | 155 | 98.71 | 0  | 0  |
| OTU623 | JX502176  | Fungi | Basidiomycota | Tremellomycetes | Tremellales | Tremellaceae | <i>Dioszegia</i>      | 5E-41  | 168 | 149 | 92.62 | 5  | 5  |
| OTU717 | KF001699  | Fungi | Basidiomycota | Tremellomycetes | Tremellales | Tremellaceae | <i>Dioszegia</i>      | 7E-99  | 361 | 182 | 100   | 0  | 0  |
| OTU596 | KF984784  | Fungi | Basidiomycota | Tremellomycetes | Tremellales | Tremellaceae | <i>Dioszegia</i>      | 2E-93  | 343 | 184 | 98.91 | 1  | 2  |
| OTU697 | GQ999423  | Fungi | Basidiomycota | Tremellomycetes | Tremellales | Tremellaceae | <i>Trimorphomyces</i> | 1E-23  | 111 | 190 | 87.37 | 10 | 12 |
| OTU662 | JQ009310  | Fungi | Basidiomycota | Tremellomycetes | Tremellales | Tremellaceae | <i>Trimorphomyces</i> | 2E-28  | 127 | 88  | 94.32 | 1  | 1  |
| OTU568 | HM992800  | Fungi | Basidiomycota | Tremellomycetes | Tremellales | Tremellaceae | unidentified          | 2E-72  | 274 | 233 | 91.85 | 6  | 11 |
| OTU693 | EU520130  | Fungi | Basidiomycota | Tremellomycetes | Tremellales | Tremellaceae | unidentified          | 6E-84  | 311 | 173 | 98.84 | 2  | 2  |
| OTU584 | Z81427    | Fungi | Basidiomycota | Tremellomycetes | Tremellales | Tremellaceae | unidentified          | 4E-26  | 119 | 131 | 87.79 | 2  | 3  |
| OTU565 | FJ627262  | Fungi | Basidiomycota | Tremellomycetes | Tremellales | Tremellaceae | unidentified          | 9E-71  | 268 | 205 | 93.66 | 5  | 7  |
| OTU690 | DQ530216  | Fungi | Basidiomycota | Tremellomycetes | Tremellales | Tremellaceae | unidentified          | 4E-38  | 159 | 144 | 92.36 | 5  | 5  |
| OTU691 | DQ914681  | Fungi | Basidiomycota | Tremellomycetes | Tremellales | Tremellaceae | unidentified          | 5E-35  | 149 | 170 | 88.24 | 4  | 5  |
| OTU721 | KJ494633  | Fungi | Basidiomycota | Wallemiomycetes | Wallemiales | Wallemiaceae | <i>Wallemia</i>       | 6E-52  | 204 | 111 | 98.2  | 0  | 0  |

---

---

|        |          |       |                 |                       |                   |              |                 |        |     |     |       |   |   |
|--------|----------|-------|-----------------|-----------------------|-------------------|--------------|-----------------|--------|-----|-----|-------|---|---|
| OTU632 | KJ780808 | Fungi | Basidiomycota   | Wallemiomycetes       | Wallemiales       | Wallemiaceae | <i>Wallemia</i> | 5E-81  | 301 | 156 | 99.36 | 0 | 0 |
| OTU711 | JX502176 | Fungi | Chytridiomycota | Monoblepharidomycetes | Monoblepharidales | unidentified | unidentified    | 5E-38  | 159 | 132 | 93.18 | 4 | 4 |
| OTU710 | JX496034 | Fungi | Chytridiomycota | unidentified          | unidentified      | unidentified | unidentified    | 2E-102 | 373 | 208 | 98.56 | 2 | 2 |
| OTU713 | KC311472 | Fungi | Rozellomycota   | unidentified          | unidentified      | unidentified | unidentified    | 8E-21  | 101 | 59  | 96.61 | 0 | 0 |
| OTU782 | HE998744 | Fungi | unidentified    | unidentified          | unidentified      | unidentified | unidentified    | 2E-34  | 147 | 149 | 90.6  | 5 | 6 |
| OTU758 | KM100715 | Fungi | unidentified    | unidentified          | unidentified      | unidentified | unidentified    | 2E-71  | 270 | 152 | 97.37 | 0 | 0 |
| OTU763 | AB255241 | Fungi | unidentified    | unidentified          | unidentified      | unidentified | unidentified    | 1E-66  | 254 | 136 | 99.26 | 1 | 1 |
| OTU792 | JX502176 | Fungi | unidentified    | unidentified          | unidentified      | unidentified | unidentified    | 6E-28  | 125 | 151 | 90.73 | 8 | 8 |
| OTU774 | DQ914681 | Fungi | unidentified    | unidentified          | unidentified      | unidentified | unidentified    | 5E-44  | 178 | 170 | 90.59 | 4 | 4 |
| OTU816 | U65610   | Fungi | unidentified    | unidentified          | unidentified      | unidentified | unidentified    | 2E-30  | 133 | 122 | 90.98 | 3 | 4 |
| OTU787 | JF497127 | Fungi | unidentified    | unidentified          | unidentified      | unidentified | unidentified    | 2E-96  | 353 | 178 | 100   | 0 | 0 |
| OTU770 | AF444483 | Fungi | unidentified    | unidentified          | unidentified      | unidentified | unidentified    | 1E-22  | 107 | 74  | 93.24 | 0 | 0 |
| OTU735 | FJ770078 | Fungi | unidentified    | unidentified          | unidentified      | unidentified | unidentified    | 4E-32  | 139 | 146 | 89.73 | 4 | 4 |
| OTU761 | KM265911 | Fungi | unidentified    | unidentified          | unidentified      | unidentified | unidentified    | 2E-53  | 210 | 106 | 100   | 0 | 0 |
| OTU757 | KM066193 | Fungi | unidentified    | unidentified          | unidentified      | unidentified | unidentified    | 7E-96  | 351 | 177 | 100   | 0 | 0 |
| OTU776 | FJ627262 | Fungi | unidentified    | unidentified          | unidentified      | unidentified | unidentified    | 2E-87  | 323 | 205 | 96.1  | 3 | 5 |
| OTU756 | KM051384 | Fungi | unidentified    | unidentified          | unidentified      | unidentified | unidentified    | 7E-65  | 248 | 157 | 96.18 | 2 | 2 |
| OTU759 | KM215637 | Fungi | unidentified    | unidentified          | unidentified      | unidentified | unidentified    | 4E-72  | 272 | 157 | 98.09 | 2 | 2 |
| OTU738 | GQ999538 | Fungi | unidentified    | unidentified          | unidentified      | unidentified | unidentified    | 2E-47  | 190 | 104 | 98.08 | 0 | 0 |
| OTU743 | HF680223 | Fungi | unidentified    | unidentified          | unidentified      | unidentified | unidentified    | 4E-47  | 188 | 119 | 95.8  | 1 | 1 |
| OTU788 | JF691121 | Fungi | unidentified    | unidentified          | unidentified      | unidentified | unidentified    | 6E-34  | 145 | 148 | 89.86 | 4 | 5 |
| OTU741 | GU966493 | Fungi | unidentified    | unidentified          | unidentified      | unidentified | unidentified    | 4E-29  | 129 | 97  | 93.81 | 2 | 2 |
| OTU728 | AB255241 | Fungi | unidentified    | unidentified          | unidentified      | unidentified | unidentified    | 1E-62  | 240 | 129 | 99.22 | 1 | 1 |
| OTU754 | KF269234 | Fungi | unidentified    | unidentified          | unidentified      | unidentified | unidentified    | 2E-52  | 206 | 154 | 94.81 | 5 | 7 |
| OTU766 | AB908129 | Fungi | unidentified    | unidentified          | unidentified      | unidentified | unidentified    | 8E-86  | 317 | 160 | 100   | 0 | 0 |
| OTU730 | AM176691 | Fungi | unidentified    | unidentified          | unidentified      | unidentified | unidentified    | 8E-61  | 234 | 141 | 97.16 | 2 | 3 |

---

---

|        |           |       |              |              |              |              |              |              |       |      |     |       |   |    |
|--------|-----------|-------|--------------|--------------|--------------|--------------|--------------|--------------|-------|------|-----|-------|---|----|
| OTU753 | KF221297  | Fungi | unidentified | unidentified | unidentified | unidentified | unidentified | unidentified | 3E-24 | 113  | 57  | 100   | 0 | 0  |
| OTU748 | KC354795  | Fungi | unidentified | unidentified | unidentified | unidentified | unidentified | unidentified | 1E-50 | 200  | 160 | 93.12 | 4 | 5  |
| OTU737 | GQ999538  | Fungi | unidentified | unidentified | unidentified | unidentified | unidentified | unidentified | 1E-51 | 204  | 103 | 100   | 0 | 0  |
| OTU746 | JQ418381  | Fungi | unidentified | unidentified | unidentified | unidentified | unidentified | unidentified | 1E-44 | 180  | 139 | 94.24 | 4 | 4  |
| OTU791 | JQ666632  | Fungi | unidentified | unidentified | unidentified | unidentified | unidentified | unidentified | 4E-41 | 168  | 132 | 93.18 | 3 | 4  |
| OTU768 | AB998515  | Fungi | unidentified | unidentified | unidentified | unidentified | unidentified | unidentified | 1E-50 | 200  | 125 | 96    | 1 | 1  |
| OTU729 | AB998384  | Fungi | unidentified | unidentified | unidentified | unidentified | unidentified | unidentified | 6E-68 | 258  | 134 | 99.25 | 0 | 0  |
| OTU762 | NR_073337 | Fungi | unidentified | unidentified | unidentified | unidentified | unidentified | unidentified | 3E-23 | 109  | 105 | 89.52 | 2 | 4  |
| OTU786 | HQ914933  | Fungi | unidentified | unidentified | unidentified | unidentified | unidentified | unidentified | 2E-68 | 260  | 178 | 95.51 | 4 | 5  |
| OTU789 | JF718364  | Fungi | unidentified | unidentified | unidentified | unidentified | unidentified | unidentified | 1E-69 | 264  | 179 | 96.09 | 5 | 7  |
| OTU734 | FJ770078  | Fungi | unidentified | unidentified | unidentified | unidentified | unidentified | unidentified | 2E-30 | 133  | 139 | 89.21 | 3 | 3  |
| OTU801 | KC978007  | Fungi | unidentified | unidentified | unidentified | unidentified | unidentified | unidentified | 1E-88 | 327  | 216 | 95.37 | 3 | 4  |
| OTU771 | AM901803  | Fungi | unidentified | unidentified | unidentified | unidentified | unidentified | unidentified | 2E-64 | 246  | 144 | 97.92 | 2 | 2  |
| OTU777 | FJ627262  | Fungi | unidentified | unidentified | unidentified | unidentified | unidentified | unidentified | 4E-85 | 315  | 198 | 96.46 | 3 | 4  |
| OTU802 | KC978007  | Fungi | unidentified | unidentified | unidentified | unidentified | unidentified | unidentified | 2E-96 | 353  | 221 | 96.83 | 4 | 5  |
| OTU790 | JN596348  | Fungi | unidentified | unidentified | unidentified | unidentified | unidentified | unidentified | 5E-56 | 218  | 153 | 94.77 | 3 | 4  |
| OTU733 | EU035415  | Fungi | unidentified | unidentified | unidentified | unidentified | unidentified | unidentified | 3E-49 | 196  | 199 | 89.95 | 6 | 10 |
| OTU744 | JN904871  | Fungi | unidentified | unidentified | unidentified | unidentified | unidentified | unidentified | 4E-25 | 115  | 74  | 95.95 | 1 | 1  |
| OTU727 | AB042224  | Fungi | unidentified | unidentified | unidentified | unidentified | unidentified | unidentified | 3E-20 | 99.6 | 103 | 88.35 | 2 | 5  |
| OTU775 | EU516831  | Fungi | unidentified | unidentified | unidentified | unidentified | unidentified | unidentified | 2E-74 | 280  | 145 | 99.31 | 0 | 0  |
| OTU813 | NR_073218 | Fungi | unidentified | unidentified | unidentified | unidentified | unidentified | unidentified | 1E-52 | 206  | 104 | 100   | 0 | 0  |
| OTU760 | KM246166  | Fungi | unidentified | unidentified | unidentified | unidentified | unidentified | unidentified | 3E-23 | 109  | 144 | 86.81 | 4 | 7  |
| OTU796 | JX998717  | Fungi | unidentified | unidentified | unidentified | unidentified | unidentified | unidentified | 1E-56 | 220  | 150 | 96    | 4 | 5  |
| OTU742 | GU981736  | Fungi | unidentified | unidentified | unidentified | unidentified | unidentified | unidentified | 3E-95 | 349  | 208 | 96.63 | 1 | 1  |
| OTU778 | FJ758367  | Fungi | unidentified | unidentified | unidentified | unidentified | unidentified | unidentified | 2E-67 | 256  | 144 | 97.92 | 1 | 2  |
| OTU781 | GQ515633  | Fungi | unidentified | unidentified | unidentified | unidentified | unidentified | unidentified | 1E-75 | 283  | 163 | 96.93 | 0 | 0  |

---





---

|        |         |
|--------|---------|
| OTU830 | unknown |
| OTU831 | unknown |
| OTU832 | unknown |
| OTU833 | unknown |
| OTU834 | unknown |
| OTU835 | unknown |
| OTU836 | unknown |
| OTU837 | unknown |
| OTU838 | unknown |
| OTU839 | unknown |
| OTU840 | unknown |
| OTU841 | unknown |
| OTU842 | unknown |
| OTU843 | unknown |
| OTU844 | unknown |
| OTU845 | unknown |
| OTU846 | unknown |
| OTU847 | unknown |
| OTU848 | unknown |
| OTU849 | unknown |
| OTU850 | unknown |
| OTU851 | unknown |
| OTU852 | unknown |
| OTU853 | unknown |
| OTU854 | unknown |
| OTU855 | unknown |

---

---

|        |         |
|--------|---------|
| OTU856 | unknown |
| OTU857 | unknown |
| OTU858 | unknown |
| OTU859 | unknown |
| OTU860 | unknown |
| OTU861 | unknown |
| OTU862 | unknown |
| OTU863 | unknown |
| OTU864 | unknown |
| OTU865 | unknown |
| OTU866 | unknown |
| OTU867 | unknown |
| OTU868 | unknown |
| OTU869 | unknown |
| OTU870 | unknown |
| OTU871 | unknown |
| OTU872 | unknown |
| OTU873 | unknown |
| OTU874 | unknown |
| OTU875 | unknown |
| OTU876 | unknown |
| OTU877 | unknown |
| OTU878 | unknown |
| OTU879 | unknown |
| OTU880 | unknown |
| OTU881 | unknown |

---

---

|        |         |
|--------|---------|
| OTU882 | unknown |
| OTU883 | unknown |
| OTU884 | unknown |
| OTU885 | unknown |
| OTU886 | unknown |
| OTU887 | unknown |
| OTU888 | unknown |
| OTU889 | unknown |
| OTU890 | unknown |
| OTU891 | unknown |
| OTU892 | unknown |
| OTU893 | unknown |
| OTU894 | unknown |
| OTU895 | unknown |
| OTU896 | unknown |
| OTU897 | unknown |
| OTU898 | unknown |
| OTU899 | unknown |
| OTU900 | unknown |
| OTU901 | unknown |
| OTU902 | unknown |
| OTU903 | unknown |
| OTU904 | unknown |
| OTU905 | unknown |
| OTU906 | unknown |
| OTU907 | unknown |

---

---

|        |         |
|--------|---------|
| OTU908 | unknown |
| OTU909 | unknown |
| OTU910 | unknown |
| OTU911 | unknown |
| OTU912 | unknown |
| OTU913 | unknown |
| OTU914 | unknown |
| OTU915 | unknown |
| OTU916 | unknown |
| OTU917 | unknown |
| OTU918 | unknown |
| OTU919 | unknown |
| OTU920 | unknown |
| OTU921 | unknown |
| OTU922 | unknown |
| OTU923 | unknown |
| OTU924 | unknown |
| OTU925 | unknown |
| OTU926 | unknown |
| OTU927 | unknown |
| OTU928 | unknown |
| OTU929 | unknown |
| OTU930 | unknown |
| OTU931 | unknown |
| OTU932 | unknown |
| OTU933 | unknown |

---

---

|        |         |
|--------|---------|
| OTU934 | unknown |
| OTU935 | unknown |
| OTU936 | unknown |
| OTU937 | unknown |
| OTU938 | unknown |
| OTU939 | unknown |
| OTU940 | unknown |
| OTU941 | unknown |
| OTU942 | unknown |
| OTU943 | unknown |
| OTU944 | unknown |
| OTU945 | unknown |
| OTU946 | unknown |
| OTU947 | unknown |
| OTU948 | unknown |
| OTU949 | unknown |
| OTU950 | unknown |
| OTU951 | unknown |
| OTU952 | unknown |
| OTU953 | unknown |
| OTU954 | unknown |
| OTU955 | unknown |
| OTU956 | unknown |
| OTU957 | unknown |
| OTU958 | unknown |
| OTU959 | unknown |

---

---

|        |         |
|--------|---------|
| OTU960 | unknown |
| OTU961 | unknown |
| OTU962 | unknown |
| OTU963 | unknown |
| OTU964 | unknown |
| OTU965 | unknown |
| OTU966 | unknown |
| OTU967 | unknown |
| OTU968 | unknown |
| OTU969 | unknown |
| OTU970 | unknown |
| OTU971 | unknown |
| OTU972 | unknown |
| OTU973 | unknown |
| OTU974 | unknown |
| OTU975 | unknown |
| OTU976 | unknown |
| OTU977 | unknown |
| OTU978 | unknown |
| OTU979 | unknown |
| OTU980 | unknown |
| OTU981 | unknown |
| OTU982 | unknown |
| OTU983 | unknown |
| OTU984 | unknown |
| OTU985 | unknown |

---

---

|         |         |
|---------|---------|
| OTU986  | unknown |
| OTU987  | unknown |
| OTU988  | unknown |
| OTU989  | unknown |
| OTU990  | unknown |
| OTU991  | unknown |
| OTU992  | unknown |
| OTU993  | unknown |
| OTU994  | unknown |
| OTU995  | unknown |
| OTU996  | unknown |
| OTU997  | unknown |
| OTU998  | unknown |
| OTU999  | unknown |
| OTU1000 | unknown |
| OTU1001 | unknown |
| OTU1002 | unknown |
| OTU1003 | unknown |
| OTU1004 | unknown |
| OTU1005 | unknown |
| OTU1006 | unknown |
| OTU1007 | unknown |
| OTU1008 | unknown |
| OTU1009 | unknown |
| OTU1010 | unknown |
| OTU1011 | unknown |

---



---

|         |         |
|---------|---------|
| OTU1012 | unknown |
| OTU1013 | unknown |
| OTU1014 | unknown |
| OTU1015 | unknown |
| OTU1016 | unknown |
| OTU1017 | unknown |
| OTU1018 | unknown |
| OTU1019 | unknown |
| OTU1020 | unknown |
| OTU1021 | unknown |
| OTU1022 | unknown |
| OTU1023 | unknown |
| OTU1024 | unknown |
| OTU1025 | unknown |
| OTU1026 | unknown |
| OTU1027 | unknown |
| OTU1028 | unknown |
| OTU1029 | unknown |
| OTU1030 | unknown |
| OTU1031 | unknown |
| OTU1032 | unknown |
| OTU1033 | unknown |
| OTU1034 | unknown |
| OTU1035 | unknown |
| OTU1036 | unknown |
| OTU1037 | unknown |

---

---

|         |         |
|---------|---------|
| OTU1038 | unknown |
| OTU1039 | unknown |
| OTU1040 | unknown |
| OTU1041 | unknown |
| OTU1042 | unknown |
| OTU1043 | unknown |
| OTU1044 | unknown |
| OTU1045 | unknown |
| OTU1046 | unknown |
| OTU1047 | unknown |
| OTU1048 | unknown |
| OTU1049 | unknown |
| OTU1050 | unknown |
| OTU1051 | unknown |
| OTU1052 | unknown |
| OTU1053 | unknown |
| OTU1054 | unknown |
| OTU1055 | unknown |
| OTU1056 | unknown |
| OTU1057 | unknown |
| OTU1058 | unknown |
| OTU1059 | unknown |
| OTU1060 | unknown |
| OTU1061 | unknown |
| OTU1062 | unknown |
| OTU1063 | unknown |

---

---

|         |         |
|---------|---------|
| OTU1064 | unknown |
| OTU1065 | unknown |
| OTU1066 | unknown |
| OTU1067 | unknown |
| OTU1068 | unknown |
| OTU1069 | unknown |
| OTU1070 | unknown |
| OTU1071 | unknown |
| OTU1072 | unknown |
| OTU1073 | unknown |
| OTU1074 | unknown |
| OTU1075 | unknown |
| OTU1076 | unknown |
| OTU1077 | unknown |
| OTU1078 | unknown |
| OTU1079 | unknown |
| OTU1080 | unknown |
| OTU1081 | unknown |
| OTU1082 | unknown |
| OTU1083 | unknown |
| OTU1084 | unknown |
| OTU1085 | unknown |
| OTU1086 | unknown |
| OTU1087 | unknown |
| OTU1088 | unknown |
| OTU1089 | unknown |

---

---

|         |         |
|---------|---------|
| OTU1090 | unknown |
| OTU1091 | unknown |
| OTU1092 | unknown |
| OTU1093 | unknown |
| OTU1094 | unknown |
| OTU1095 | unknown |
| OTU1096 | unknown |
| OTU1097 | unknown |
| OTU1098 | unknown |
| OTU1099 | unknown |
| OTU1100 | unknown |
| OTU1101 | unknown |
| OTU1102 | unknown |
| OTU1103 | unknown |
| OTU1104 | unknown |
| OTU1105 | unknown |
| OTU1106 | unknown |
| OTU1107 | unknown |
| OTU1108 | unknown |
| OTU1109 | unknown |
| OTU1110 | unknown |
| OTU1111 | unknown |
| OTU1112 | unknown |
| OTU1113 | unknown |
| OTU1114 | unknown |
| OTU1115 | unknown |

---

---

|         |         |
|---------|---------|
| OTU1116 | unknown |
| OTU1117 | unknown |
| OTU1118 | unknown |
| OTU1119 | unknown |
| OTU1120 | unknown |
| OTU1121 | unknown |
| OTU1122 | unknown |
| OTU1123 | unknown |
| OTU1124 | unknown |
| OTU1125 | unknown |
| OTU1126 | unknown |
| OTU1127 | unknown |
| OTU1128 | unknown |
| OTU1129 | unknown |
| OTU1130 | unknown |
| OTU1131 | unknown |
| OTU1132 | unknown |
| OTU1133 | unknown |
| OTU1134 | unknown |
| OTU1135 | unknown |
| OTU1136 | unknown |
| OTU1137 | unknown |
| OTU1138 | unknown |
| OTU1139 | unknown |
| OTU1140 | unknown |
| OTU1141 | unknown |

---

---

|         |         |
|---------|---------|
| OTU1142 | unknown |
| OTU1143 | unknown |
| OTU1144 | unknown |
| OTU1145 | unknown |
| OTU1146 | unknown |
| OTU1147 | unknown |
| OTU1148 | unknown |
| OTU1149 | unknown |
| OTU1150 | unknown |
| OTU1151 | unknown |
| OTU1152 | unknown |
| OTU1153 | unknown |
| OTU1154 | unknown |
| OTU1155 | unknown |
| OTU1156 | unknown |
| OTU1157 | unknown |
| OTU1158 | unknown |
| OTU1159 | unknown |
| OTU1160 | unknown |
| OTU1161 | unknown |
| OTU1162 | unknown |
| OTU1163 | unknown |
| OTU1164 | unknown |
| OTU1165 | unknown |
| OTU1166 | unknown |
| OTU1167 | unknown |

---

---

|         |         |
|---------|---------|
| OTU1168 | unknown |
| OTU1169 | unknown |
| OTU1170 | unknown |
| OTU1171 | unknown |
| OTU1172 | unknown |
| OTU1173 | unknown |
| OTU1174 | unknown |
| OTU1175 | unknown |
| OTU1176 | unknown |
| OTU1177 | unknown |
| OTU1178 | unknown |
| OTU1179 | unknown |
| OTU1180 | unknown |
| OTU1181 | unknown |
| OTU1182 | unknown |
| OTU1183 | unknown |
| OTU1184 | unknown |
| OTU1185 | unknown |
| OTU1186 | unknown |
| OTU1187 | unknown |
| OTU1188 | unknown |
| OTU1189 | unknown |
| OTU1190 | unknown |
| OTU1191 | unknown |
| OTU1192 | unknown |
| OTU1193 | unknown |

---

---

|         |         |
|---------|---------|
| OTU1194 | unknown |
| OTU1195 | unknown |
| OTU1196 | unknown |
| OTU1197 | unknown |
| OTU1198 | unknown |
| OTU1199 | unknown |
| OTU1200 | unknown |
| OTU1201 | unknown |
| OTU1202 | unknown |
| OTU1203 | unknown |
| OTU1204 | unknown |
| OTU1205 | unknown |
| OTU1206 | unknown |
| OTU1207 | unknown |
| OTU1208 | unknown |
| OTU1209 | unknown |
| OTU1210 | unknown |
| OTU1211 | unknown |
| OTU1212 | unknown |
| OTU1213 | unknown |
| OTU1214 | unknown |
| OTU1215 | unknown |
| OTU1216 | unknown |
| OTU1217 | unknown |
| OTU1218 | unknown |
| OTU1219 | unknown |

---



---

|         |         |
|---------|---------|
| OTU1220 | unknown |
| OTU1221 | unknown |
| OTU1222 | unknown |
| OTU1223 | unknown |
| OTU1224 | unknown |
| OTU1225 | unknown |
| OTU1226 | unknown |
| OTU1227 | unknown |
| OTU1228 | unknown |
| OTU1229 | unknown |
| OTU1230 | unknown |
| OTU1231 | unknown |
| OTU1232 | unknown |
| OTU1233 | unknown |
| OTU1234 | unknown |
| OTU1235 | unknown |
| OTU1236 | unknown |
| OTU1237 | unknown |
| OTU1238 | unknown |
| OTU1239 | unknown |
| OTU1240 | unknown |
| OTU1241 | unknown |
| OTU1242 | unknown |
| OTU1243 | unknown |
| OTU1244 | unknown |
| OTU1245 | unknown |

---

---

|         |         |
|---------|---------|
| OTU1246 | unknown |
| OTU1247 | unknown |
| OTU1248 | unknown |
| OTU1249 | unknown |
| OTU1250 | unknown |
| OTU1251 | unknown |
| OTU1252 | unknown |
| OTU1253 | unknown |
| OTU1254 | unknown |
| OTU1255 | unknown |
| OTU1256 | unknown |
| OTU1257 | unknown |
| OTU1258 | unknown |
| OTU1259 | unknown |
| OTU1260 | unknown |
| OTU1261 | unknown |
| OTU1262 | unknown |
| OTU1263 | unknown |
| OTU1264 | unknown |
| OTU1265 | unknown |
| OTU1266 | unknown |
| OTU1267 | unknown |
| OTU1268 | unknown |
| OTU1269 | unknown |
| OTU1270 | unknown |
| OTU1271 | unknown |

---

---

|         |         |
|---------|---------|
| OTU1272 | unknown |
| OTU1273 | unknown |
| OTU1274 | unknown |
| OTU1275 | unknown |
| OTU1276 | unknown |
| OTU1277 | unknown |
| OTU1278 | unknown |
| OTU1279 | unknown |
| OTU1280 | unknown |
| OTU1281 | unknown |
| OTU1282 | unknown |
| OTU1283 | unknown |
| OTU1284 | unknown |
| OTU1285 | unknown |
| OTU1286 | unknown |
| OTU1287 | unknown |
| OTU1288 | unknown |
| OTU1289 | unknown |
| OTU1290 | unknown |
| OTU1291 | unknown |
| OTU1292 | unknown |
| OTU1293 | unknown |
| OTU1294 | unknown |
| OTU1295 | unknown |
| OTU1296 | unknown |
| OTU1297 | unknown |

---

---

|         |         |
|---------|---------|
| OTU1298 | unknown |
| OTU1299 | unknown |
| OTU1300 | unknown |
| OTU1301 | unknown |
| OTU1302 | unknown |
| OTU1303 | unknown |
| OTU1304 | unknown |
| OTU1305 | unknown |
| OTU1306 | unknown |
| OTU1307 | unknown |
| OTU1308 | unknown |
| OTU1309 | unknown |
| OTU1310 | unknown |
| OTU1311 | unknown |
| OTU1312 | unknown |
| OTU1313 | unknown |
| OTU1314 | unknown |
| OTU1315 | unknown |
| OTU1316 | unknown |
| OTU1317 | unknown |
| OTU1318 | unknown |
| OTU1319 | unknown |
| OTU1320 | unknown |
| OTU1321 | unknown |
| OTU1322 | unknown |
| OTU1323 | unknown |

---

---

|         |         |
|---------|---------|
| OTU1324 | unknown |
| OTU1325 | unknown |
| OTU1326 | unknown |
| OTU1327 | unknown |
| OTU1328 | unknown |
| OTU1329 | unknown |
| OTU1330 | unknown |
| OTU1331 | unknown |
| OTU1332 | unknown |
| OTU1333 | unknown |
| OTU1334 | unknown |
| OTU1335 | unknown |
| OTU1336 | unknown |
| OTU1337 | unknown |
| OTU1338 | unknown |
| OTU1339 | unknown |
| OTU1340 | unknown |
| OTU1341 | unknown |
| OTU1342 | unknown |
| OTU1343 | unknown |
| OTU1344 | unknown |
| OTU1345 | unknown |
| OTU1346 | unknown |
| OTU1347 | unknown |
| OTU1348 | unknown |
| OTU1349 | unknown |

---

---

|         |         |
|---------|---------|
| OTU1350 | unknown |
| OTU1351 | unknown |
| OTU1352 | unknown |
| OTU1353 | unknown |
| OTU1354 | unknown |
| OTU1355 | unknown |
| OTU1356 | unknown |
| OTU1357 | unknown |
| OTU1358 | unknown |
| OTU1359 | unknown |
| OTU1360 | unknown |
| OTU1361 | unknown |
| OTU1362 | unknown |
| OTU1363 | unknown |
| OTU1364 | unknown |
| OTU1365 | unknown |
| OTU1366 | unknown |
| OTU1367 | unknown |
| OTU1368 | unknown |
| OTU1369 | unknown |
| OTU1370 | unknown |
| OTU1371 | unknown |
| OTU1372 | unknown |
| OTU1373 | unknown |
| OTU1374 | unknown |
| OTU1375 | unknown |

---

---

|         |         |
|---------|---------|
| OTU1376 | unknown |
| OTU1377 | unknown |
| OTU1378 | unknown |
| OTU1379 | unknown |
| OTU1380 | unknown |
| OTU1381 | unknown |
| OTU1382 | unknown |
| OTU1383 | unknown |
| OTU1384 | unknown |
| OTU1385 | unknown |
| OTU1386 | unknown |
| OTU1387 | unknown |
| OTU1388 | unknown |
| OTU1389 | unknown |
| OTU1390 | unknown |
| OTU1391 | unknown |

---

Supplementary Table S4. Relative abundances of read and OTU counts per site at class level.

---

| Relative abundances of read counts |                 |       |       |       |       |       |       |       |       |       |       |       |       |       |       |       |       |       |       |       |       |       |       |       |       |       |       |       |       |       |       |
|------------------------------------|-----------------|-------|-------|-------|-------|-------|-------|-------|-------|-------|-------|-------|-------|-------|-------|-------|-------|-------|-------|-------|-------|-------|-------|-------|-------|-------|-------|-------|-------|-------|-------|
| Phylum                             | Class           | 1     | 2     | 3     | 4     | 5     | 6     | 7     | 8     | 9     | 10    | 11    | 12    | 13    | 14    | 15    | 16    | 17    | 18    | 19    | 20    | 21    | 22    | 23    | 24    | 25    | 26    | 27    | 28    | 29    | 30    |
| Ascomycota                         | Dothideomycetes | 33.06 | 32.40 | 30.30 | 30.37 | 29.71 | 31.06 | 29.35 | 28.87 | 26.87 | 32.84 | 23.25 | 33.33 | 28.97 | 26.64 | 26.56 | 25.88 | 27.67 | 29.04 | 27.94 | 30.22 | 25.66 | 27.81 | 32.14 | 27.37 | 32.63 | 26.07 | 27.65 | 30.18 | 30.05 | 37.53 |
| Ascomycota                         | Eurotiomycetes  | 26.50 | 29.14 | 26.77 | 28.66 | 26.42 | 27.29 | 26.59 | 29.66 | 30.58 | 24.85 | 32.61 | 22.35 | 29.10 | 31.27 | 30.55 | 31.38 | 27.57 | 31.81 | 29.75 | 27.14 | 30.44 | 28.21 | 25.05 | 26.78 | 25.41 | 27.55 | 32.09 | 29.73 | 27.98 | 22.87 |
| Ascomycota                         | Incertae        | 0.00  | 0.00  | 0.00  | 0.00  | 0.05  | 0.00  | 0.00  | 0.00  | 0.03  | 0.00  | 0.00  | 0.03  | 0.04  | 0.03  | 0.00  | 0.00  | 0.00  | 0.00  | 0.00  | 0.00  | 0.00  | 0.00  | 0.00  | 0.00  | 0.00  | 0.00  | 0.00  | 0.00  | 0.00  |       |
| Ascomycota                         | Leotiomycetes   | 0.23  | 0.14  | 0.00  | 0.00  | 0.00  | 0.11  | 0.00  | 0.28  | 0.07  | 0.07  | 0.47  | 0.13  | 0.00  | 0.00  | 0.07  | 0.03  | 0.13  | 0.00  | 0.15  | 0.17  | 0.03  | 0.04  | 0.00  | 0.00  | 0.19  | 0.00  | 0.00  | 0.00  | 0.12  | 0.06  |
| Ascomycota                         | Saccharomycetes | 0.73  | 1.93  | 0.39  | 1.60  | 0.90  | 0.83  | 1.70  | 1.13  | 1.28  | 0.85  | 0.94  | 0.60  | 0.79  | 0.42  | 0.83  | 0.99  | 2.13  | 0.43  | 1.14  | 0.97  | 0.38  | 0.84  | 0.38  | 1.05  | 1.64  | 1.76  | 1.29  | 0.77  | 1.00  | 1.01  |

---

|                        |                       |       |       |       |       |       |       |       |       |       |       |       |       |       |       |       |       |       |       |       |       |       |       |       |       |       |       |       |       |       |       |      |
|------------------------|-----------------------|-------|-------|-------|-------|-------|-------|-------|-------|-------|-------|-------|-------|-------|-------|-------|-------|-------|-------|-------|-------|-------|-------|-------|-------|-------|-------|-------|-------|-------|-------|------|
| <b>Ascomycota</b>      | Sordariomycetes       | 17.74 | 17.35 | 20.91 | 15.80 | 21.78 | 22.43 | 20.79 | 18.38 | 18.32 | 19.16 | 19.89 | 19.55 | 19.88 | 19.62 | 21.58 | 17.36 | 19.91 | 19.30 | 20.19 | 18.71 | 18.94 | 17.55 | 18.69 | 17.19 | 18.00 | 20.57 | 18.38 | 18.42 | 18.10 | 17.21 |      |
| <b>Ascomycota</b>      | Taphrinomycetes       | 0.33  | 0.14  | 0.34  | 0.18  | 0.18  | 0.15  | 0.18  | 0.18  | 0.16  | 0.17  | 0.00  | 0.03  | 0.25  | 0.09  | 0.07  | 0.10  | 0.23  | 0.06  | 0.06  | 0.17  | 0.16  | 0.04  | 0.04  | 0.12  | 0.11  | 0.14  | 0.11  | 0.18  | 0.17  | 0.09  |      |
| <b>Ascomycota</b>      | A_unidentified        | 0.35  | 0.05  | 0.06  | 0.07  | 0.18  | 0.04  | 0.18  | 0.06  | 0.07  | 0.14  | 0.12  | 0.22  | 0.04  | 0.12  | 0.13  | 0.03  | 0.10  | 0.18  | 0.20  | 0.06  | 0.10  | 0.09  | 0.04  | 0.00  | 0.04  | 0.23  | 0.11  | 0.15  | 0.21  | 0.15  |      |
| <b>Basidiomycota</b>   | Agaricomycetes        | 2.05  | 2.29  | 2.85  | 2.83  | 2.34  | 3.32  | 2.67  | 2.60  | 3.35  | 1.49  | 2.35  | 2.36  | 4.09  | 3.02  | 2.66  | 2.49  | 3.92  | 2.22  | 1.93  | 3.22  | 2.42  | 2.89  | 2.56  | 2.22  | 1.26  | 1.85  | 2.09  | 1.95  | 2.57  | 1.48  |      |
| <b>Basidiomycota</b>   | Agaricostilbomycetes  | 0.08  | 0.00  | 0.00  | 0.00  | 0.05  | 0.00  | 0.09  | 0.00  | 0.00  | 0.00  | 0.00  | 0.00  | 0.08  | 0.06  | 0.00  | 0.03  | 0.00  | 0.00  | 0.15  | 0.00  | 0.00  | 0.00  | 0.17  | 0.00  | 0.11  | 0.00  | 0.08  | 0.04  | 0.00  | 0.00  |      |
| <b>Basidiomycota</b>   | Cystobasidiomycetes   | 1.23  | 1.28  | 1.17  | 0.87  | 1.94  | 0.87  | 1.89  | 2.08  | 0.82  | 1.08  | 1.65  | 1.40  | 1.54  | 1.34  | 1.66  | 2.12  | 1.28  | 2.22  | 1.37  | 2.05  | 2.49  | 2.27  | 2.52  | 1.29  | 2.48  | 2.96  | 1.41  | 1.81  | 2.49  | 1.84  |      |
| <b>Basidiomycota</b>   | Microbotryomycetes    | 1.70  | 1.79  | 1.06  | 1.20  | 2.12  | 1.70  | 1.79  | 1.07  | 1.87  | 2.47  | 1.29  | 3.18  | 2.88  | 2.99  | 1.86  | 3.08  | 1.70  | 1.91  | 2.48  | 2.74  | 2.26  | 1.73  | 2.60  | 1.99  | 1.07  | 1.16  | 0.42  | 1.44  | 0.95  | 1.63  |      |
| <b>Basidiomycota</b>   | Pucciniomycetes       | 0.00  | 0.00  | 0.06  | 0.07  | 0.00  | 0.00  | 0.00  | 0.00  | 0.00  | 0.00  | 0.12  | 0.10  | 0.00  | 0.03  | 0.03  | 0.07  | 0.00  | 0.00  | 0.00  | 0.00  | 0.00  | 0.13  | 0.00  | 0.00  | 0.00  | 0.00  | 0.00  | 0.00  | 0.15  | 0.00  | 0.00 |
| <b>Basidiomycota</b>   | Tremellomycetes       | 2.28  | 2.43  | 3.58  | 6.90  | 5.50  | 2.79  | 4.55  | 4.86  | 4.74  | 5.72  | 5.53  | 5.28  | 3.00  | 3.32  | 3.13  | 3.15  | 2.58  | 2.90  | 3.10  | 3.02  | 2.87  | 4.18  | 2.56  | 7.25  | 4.17  | 4.11  | 2.47  | 2.76  | 2.99  | 2.81  |      |
| <b>Basidiomycota</b>   | unidentified          | 0.13  | 0.41  | 0.11  | 0.00  | 0.14  | 0.00  | 0.05  | 0.28  | 0.07  | 0.07  | 0.00  | 0.10  | 0.00  | 0.15  | 0.00  | 0.07  | 0.13  | 0.25  | 0.00  | 0.00  | 0.00  | 0.13  | 0.04  | 0.00  | 0.04  | 0.00  | 0.08  | 0.04  | 0.00  | 0.09  |      |
| <b>Basidiomycota</b>   | Walleniomycetes       | 0.00  | 0.05  | 0.00  | 0.04  | 0.00  | 0.00  | 0.05  | 0.03  | 0.00  | 0.14  | 0.00  | 0.00  | 0.00  | 0.03  | 0.00  | 0.00  | 0.03  | 0.12  | 0.00  | 0.19  | 0.29  | 0.00  | 0.00  | 0.00  | 0.00  | 0.09  | 0.15  | 0.00  | 0.00  | 0.03  |      |
| <b>Chytridiomycota</b> | Monoblepharidomycetes | 0.00  | 0.00  | 0.00  | 0.00  | 0.00  | 0.00  | 0.00  | 0.00  | 0.00  | 0.00  | 0.00  | 0.00  | 0.00  | 0.09  | 0.00  | 0.30  | 0.23  | 0.00  | 0.15  | 0.00  | 0.00  | 0.00  | 0.04  | 0.00  | 0.15  | 0.00  | 0.11  | 0.00  | 0.00  | 0.18  |      |
| <b>Chytridiomycota</b> | unidentified          | 0.60  | 0.37  | 0.61  | 0.91  | 0.14  | 0.49  | 0.23  | 0.31  | 0.72  | 0.71  | 0.35  | 0.45  | 0.25  | 0.24  | 0.40  | 0.17  | 0.52  | 0.37  | 0.32  | 0.25  | 0.38  | 0.40  | 0.13  | 0.35  | 0.34  | 0.88  | 0.99  | 0.33  | 0.66  | 0.36  |      |
| <b>Rozellomycota</b>   | unidentified          | 0.00  | 0.05  | 0.00  | 0.07  | 0.00  | 0.04  | 0.00  | 0.00  | 0.00  | 0.00  | 0.00  | 0.00  | 0.00  | 0.03  | 0.03  | 0.00  | 0.00  | 0.00  | 0.00  | 0.00  | 0.00  | 0.00  | 0.00  | 0.00  | 0.00  | 0.00  | 0.00  | 0.04  | 0.00  | 0.00  |      |
| <b>unidentified</b>    | unidentified          | 12.36 | 9.87  | 11.29 | 9.95  | 8.48  | 8.56  | 9.89  | 9.54  | 10.98 | 9.92  | 11.18 | 10.76 | 8.84  | 10.30 | 9.97  | 12.19 | 11.81 | 8.82  | 10.78 | 10.17 | 13.20 | 12.88 | 12.59 | 14.27 | 11.96 | 12.53 | 12.19 | 11.53 | 12.16 | 12.17 |      |
| <b>Zygomycota</b>      | Incertae              | 0.65  | 0.32  | 0.50  | 0.47  | 0.09  | 0.34  | 0.00  | 0.67  | 0.07  | 0.34  | 0.24  | 0.13  | 0.25  | 0.21  | 0.47  | 0.56  | 0.07  | 0.37  | 0.29  | 0.91  | 0.38  | 0.80  | 0.43  | 0.12  | 0.38  | 0.09  | 0.38  | 0.48  | 0.54  | 0.50  |      |
| <b>Total</b>           |                       | 100   | 100   | 100   | 100   | 100   | 100   | 100   | 100   | 100   | 100   | 100   | 100   | 100   | 100   | 100   | 100   | 100   | 100   | 100   | 100   | 100   | 100   | 100   | 100   | 100   | 100   | 100   | 100   | 100   | 100   |      |

| Relative abundances of read counts |                 |       |       |       |       |       |       |       |       |       |       |       |       |       |       |       |       |       |       |       |       |       |       |       |       |       |       |       |       |       |       |
|------------------------------------|-----------------|-------|-------|-------|-------|-------|-------|-------|-------|-------|-------|-------|-------|-------|-------|-------|-------|-------|-------|-------|-------|-------|-------|-------|-------|-------|-------|-------|-------|-------|-------|
| Phylum                             | Class           | 1     | 2     | 3     | 4     | 5     | 6     | 7     | 8     | 9     | 10    | 11    | 12    | 13    | 14    | 15    | 16    | 17    | 18    | 19    | 20    | 21    | 22    | 23    | 24    | 25    | 26    | 27    | 28    | 29    | 30    |
| <b>Ascomycota</b>                  | Dothideomycetes | 24.55 | 23.21 | 24.31 | 24.40 | 22.09 | 25.72 | 21.47 | 22.44 | 23.10 | 20.76 | 22.09 | 22.52 | 20.54 | 23.35 | 22.99 | 21.41 | 22.29 | 19.22 | 22.89 | 24.38 | 22.16 | 20.00 | 22.88 | 18.48 | 22.74 | 22.01 | 21.36 | 20.72 | 21.57 | 24.73 |
| <b>Ascomycota</b>                  | Eurotiomycetes  | 28.64 | 29.01 | 25.35 | 24.70 | 27.91 | 27.75 | 27.24 | 26.42 | 28.26 | 24.56 | 27.13 | 26.27 | 29.17 | 27.47 | 29.02 | 28.46 | 26.57 | 32.38 | 26.32 | 25.75 | 26.42 | 25.81 | 24.45 | 23.22 | 24.20 | 22.96 | 26.41 | 24.03 | 26.89 | 25.27 |
| <b>Ascomycota</b>                  | Incertae        | 0.00  | 0.00  | 0.00  | 0.00  | 0.29  | 0.00  | 0.00  | 0.00  | 0.27  | 0.00  | 0.00  | 0.27  | 0.30  | 0.27  | 0.00  | 0.00  | 0.00  | 0.00  | 0.00  | 0.00  | 0.00  | 0.00  | 0.00  | 0.00  | 0.00  | 0.00  | 0.00  | 0.00  | 0.00  |       |
| <b>Ascomycota</b>                  | Leotiomycetes   | 1.02  | 0.34  | 0.00  | 0.00  | 0.00  | 0.87  | 0.00  | 0.28  | 0.27  | 0.58  | 1.16  | 0.80  | 0.00  | 0.00  | 0.29  | 0.27  | 0.29  | 0.00  | 0.53  | 0.55  | 0.28  | 0.32  | 0.00  | 0.00  | 0.58  | 0.00  | 0.00  | 0.00  | 0.56  | 0.27  |
| <b>Ascomycota</b>                  | Saccharomycetes | 1.53  | 2.05  | 0.35  | 1.81  | 1.45  | 1.73  | 2.24  | 2.27  | 1.63  | 2.05  | 1.16  | 1.07  | 1.79  | 1.10  | 1.72  | 1.90  | 2.57  | 0.71  | 2.37  | 1.37  | 1.42  | 1.61  | 1.57  | 2.37  | 3.21  | 2.20  | 2.08  | 1.66  | 2.24  | 1.86  |
| <b>Ascomycota</b>                  | Sordariomycetes | 18.93 | 19.80 | 22.22 | 17.77 | 21.22 | 20.81 | 21.15 | 19.32 | 19.84 | 21.64 | 19.77 | 21.18 | 20.24 | 18.96 | 22.41 | 17.89 | 19.71 | 20.28 | 18.68 | 21.37 | 20.45 | 20.97 | 21.32 | 20.38 | 20.12 | 18.24 | 21.07 | 20.99 | 20.17 | 19.68 |
| <b>Ascomycota</b>                  | Taphrinomycetes | 0.26  | 0.34  | 0.35  | 0.30  | 0.29  | 0.29  | 0.32  | 0.28  | 0.27  | 0.29  | 0.00  | 0.27  | 0.30  | 0.27  | 0.29  | 0.27  | 0.29  | 0.36  | 0.26  | 0.27  | 0.28  | 0.32  | 0.31  | 0.47  | 0.29  | 0.31  | 0.30  | 0.28  | 0.28  | 0.27  |





Supplementary Table S5. Read and OTU numbers (and relative abundance) of 130 identified genera.

| <b>Genus</b>           | <b>OTUs</b> | <b>Sequences</b> | <b>percent of OTUs</b> | <b>percent of Sequences</b> |
|------------------------|-------------|------------------|------------------------|-----------------------------|
| <i>Shiraia</i>         | 25          | 7052             | 3.06372549             | 8.831890992                 |
| <i>Perenniporia</i>    | 14          | 4914             | 1.715686275            | 6.154270041                 |
| <i>Penicillium</i>     | 31          | 4619             | 3.799019608            | 5.784813456                 |
| <i>Phialemonium</i>    | 14          | 4417             | 1.715686275            | 5.531829624                 |
| <i>Trichomerium</i>    | 30          | 3904             | 3.676470588            | 4.889350884                 |
| <i>Nigrospora</i>      | 28          | 2875             | 3.431372549            | 3.600636217                 |
| <i>Didymosphaeria</i>  | 4           | 1893             | 0.490196078            | 2.370784125                 |
| <i>Erythrobasidium</i> | 22          | 1645             | 2.696078431            | 2.060190114                 |
| <i>Libertella</i>      | 10          | 1528             | 1.225490196            | 1.913659875                 |
| <i>Sarocladium</i>     | 11          | 1320             | 1.348039216            | 1.653161672                 |
| <i>Ganoderma</i>       | 14          | 1207             | 1.715686275            | 1.511641013                 |
| <i>Rhodotorula</i>     | 17          | 1191             | 2.083333333            | 1.49160269                  |
| <i>Fusarium</i>        | 15          | 1128             | 1.838235294            | 1.412701792                 |
| <i>Mycosphaerella</i>  | 19          | 1114             | 2.328431373            | 1.395168259                 |
| <i>Xylaria</i>         | 10          | 1077             | 1.225490196            | 1.348829637                 |
| <i>Eutypa</i>          | 14          | 997              | 1.715686275            | 1.24863802                  |
| <i>Phialophora</i>     | 11          | 962              | 1.348039216            | 1.204804188                 |
| <i>Alternaria</i>      | 3           | 961              | 0.367647059            | 1.203551793                 |
| <i>Bullera</i>         | 9           | 930              | 1.102941176            | 1.164727541                 |
| <i>Hannaella</i>       | 7           | 740              | 0.857843137            | 0.926772452                 |
| <i>Rhinocladiella</i>  | 7           | 702              | 0.857843137            | 0.879181434                 |
| <i>Cryptococcus</i>    | 18          | 698              | 2.205882353            | 0.874171854                 |
| <i>Dioszegia</i>       | 4           | 526              | 0.490196078            | 0.658759878                 |
| <i>Phyllachora</i>     | 1           | 525              | 0.12254902             | 0.657507483                 |
| <i>Hypoxylon</i>       | 10          | 465              | 1.225490196            | 0.582363771                 |
| <i>Strelitziana</i>    | 4           | 464              | 0.490196078            | 0.581111376                 |
| <i>Cladosporium</i>    | 9           | 441              | 1.102941176            | 0.552306286                 |
| <i>Metschnikowia</i>   | 11          | 368              | 1.348039216            | 0.460881436                 |
| <i>Gliocladium</i>     | 5           | 305              | 0.612745098            | 0.381980538                 |
| <i>Ramichloridium</i>  | 9           | 303              | 1.102941176            | 0.379475747                 |
| <i>Cyphellophora</i>   | 9           | 277              | 1.102941176            | 0.346913472                 |
| <i>Epicoccum</i>       | 2           | 250              | 0.245098039            | 0.313098801                 |
| <i>Arthrinium</i>      | 2           | 247              | 0.245098039            | 0.309341616                 |
| <i>Leptosphaeria</i>   | 8           | 236              | 0.980392157            | 0.295565269                 |
| <i>Zymoseptoria</i>    | 6           | 211              | 0.735294118            | 0.264255388                 |
| <i>Davidiella</i>      | 1           | 199              | 0.12254902             | 0.249226646                 |
| <i>Acrodontium</i>     | 4           | 185              | 0.490196078            | 0.231693113                 |

---

|                          |    |     |             |             |
|--------------------------|----|-----|-------------|-------------|
| <i>Aspergillus</i>       | 10 | 183 | 1.225490196 | 0.229188323 |
| <i>Kernia</i>            | 6  | 158 | 0.735294118 | 0.197878443 |
| <i>Phaeosphaeria</i>     | 4  | 149 | 0.490196078 | 0.186606886 |
| <i>Hypholoma</i>         | 2  | 148 | 0.245098039 | 0.18535449  |
| <i>Rhizopogon</i>        | 2  | 145 | 0.245098039 | 0.181597305 |
| <i>Pyrenochaetopsis</i>  | 2  | 141 | 0.245098039 | 0.176587724 |
| <i>Occultifur</i>        | 2  | 140 | 0.245098039 | 0.175335329 |
| <i>Acremonium</i>        | 4  | 133 | 0.490196078 | 0.166568562 |
| <i>Hypocrea</i>          | 4  | 125 | 0.490196078 | 0.156549401 |
| <i>Aureobasidium</i>     | 2  | 124 | 0.245098039 | 0.155297006 |
| <i>Trichoderma</i>       | 5  | 114 | 0.612745098 | 0.142773053 |
| <i>Myriangium</i>        | 3  | 108 | 0.367647059 | 0.135258682 |
| <i>Ciboria</i>           | 2  | 97  | 0.245098039 | 0.121482335 |
| <i>Talaromyces</i>       | 7  | 96  | 0.857843137 | 0.12022994  |
| <i>Phaeosphaeriopsis</i> | 3  | 84  | 0.367647059 | 0.105201197 |
| <i>Fellomyces</i>        | 4  | 83  | 0.490196078 | 0.103948802 |
| <i>Sporobolomyces</i>    | 4  | 75  | 0.490196078 | 0.09392964  |
| <i>Mortierella</i>       | 7  | 74  | 0.857843137 | 0.092677245 |
| <i>Capnodium</i>         | 2  | 73  | 0.245098039 | 0.09142485  |
| <i>Myrothecium</i>       | 2  | 71  | 0.245098039 | 0.08892006  |
| <i>Paraconiothyrium</i>  | 4  | 69  | 0.490196078 | 0.086415269 |
| <i>Pseudocercospora</i>  | 1  | 66  | 0.12254902  | 0.082658084 |
| <i>Eurotium</i>          | 1  | 64  | 0.12254902  | 0.080153293 |
| <i>Beauveria</i>         | 2  | 64  | 0.245098039 | 0.080153293 |
| <i>Purpureocillium</i>   | 1  | 56  | 0.12254902  | 0.070134132 |
| <i>Didymella</i>         | 3  | 54  | 0.367647059 | 0.067629341 |
| <i>Microascus</i>        | 3  | 53  | 0.367647059 | 0.066376946 |
| <i>Cordyceps</i>         | 1  | 52  | 0.12254902  | 0.065124551 |
| <i>Verticillium</i>      | 1  | 49  | 0.12254902  | 0.061367365 |
| <i>Chaetomium</i>        | 4  | 47  | 0.490196078 | 0.058862575 |
| <i>Trechispora</i>       | 1  | 47  | 0.12254902  | 0.058862575 |
| <i>Lophiostoma</i>       | 2  | 46  | 0.245098039 | 0.057610179 |
| <i>Pichia</i>            | 2  | 45  | 0.245098039 | 0.056357784 |
| <i>Bionectria</i>        | 1  | 44  | 0.12254902  | 0.055105389 |
| <i>Dinemasporium</i>     | 1  | 43  | 0.12254902  | 0.053852994 |
| <i>Stropharia</i>        | 3  | 41  | 0.367647059 | 0.051348203 |
| <i>Nectria</i>           | 2  | 39  | 0.245098039 | 0.048843413 |
| <i>Psathyrella</i>       | 1  | 39  | 0.12254902  | 0.048843413 |
| <i>Coniothyrium</i>      | 1  | 37  | 0.12254902  | 0.046338623 |

---

---

|                           |   |    |             |             |
|---------------------------|---|----|-------------|-------------|
| <i>Massarina</i>          | 1 | 34 | 0.12254902  | 0.042581437 |
| <i>Colletotrichum</i>     | 1 | 33 | 0.12254902  | 0.041329042 |
| <i>Wallemia</i>           | 2 | 33 | 0.245098039 | 0.041329042 |
| <i>Candida</i>            | 2 | 32 | 0.245098039 | 0.040076647 |
| <i>Coprinopsis</i>        | 2 | 32 | 0.245098039 | 0.040076647 |
| <i>Peniophora</i>         | 1 | 32 | 0.12254902  | 0.040076647 |
| <i>Oidiodendron</i>       | 1 | 31 | 0.12254902  | 0.038824251 |
| <i>Passalora</i>          | 2 | 30 | 0.245098039 | 0.037571856 |
| <i>Pestalotiopsis</i>     | 1 | 30 | 0.12254902  | 0.037571856 |
| <i>Guehomyces</i>         | 1 | 29 | 0.12254902  | 0.036319461 |
| <i>Hyalodendriella</i>    | 1 | 26 | 0.12254902  | 0.032562275 |
| <i>Coprinellus</i>        | 2 | 22 | 0.245098039 | 0.027552695 |
| <i>Pseudocercospora</i>   | 1 | 21 | 0.12254902  | 0.026300299 |
| <i>Plectosphaerella</i>   | 1 | 21 | 0.12254902  | 0.026300299 |
| <i>Neosartorya</i>        | 2 | 20 | 0.245098039 | 0.025047904 |
| <i>Xenomeris</i>          | 1 | 19 | 0.12254902  | 0.023795509 |
| <i>Pseudeurotium</i>      | 1 | 19 | 0.12254902  | 0.023795509 |
| <i>Villosiclava</i>       | 1 | 19 | 0.12254902  | 0.023795509 |
| <i>Annulohyphoxylon</i>   | 1 | 19 | 0.12254902  | 0.023795509 |
| <i>Stachybotrys</i>       | 1 | 18 | 0.12254902  | 0.022543114 |
| <i>Devriesia</i>          | 2 | 17 | 0.245098039 | 0.021290718 |
| <i>Phoma</i>              | 2 | 17 | 0.245098039 | 0.021290718 |
| <i>Chrysosporium</i>      | 3 | 17 | 0.367647059 | 0.021290718 |
| <i>Cercospora</i>         | 1 | 16 | 0.12254902  | 0.020038323 |
| <i>Phomopsis</i>          | 1 | 16 | 0.12254902  | 0.020038323 |
| <i>Sebacina</i>           | 2 | 16 | 0.245098039 | 0.020038323 |
| <i>Trimorphomyces</i>     | 2 | 16 | 0.245098039 | 0.020038323 |
| <i>Preussia</i>           | 2 | 15 | 0.245098039 | 0.018785928 |
| <i>Neurospora</i>         | 1 | 15 | 0.12254902  | 0.018785928 |
| <i>Psilocybe</i>          | 1 | 15 | 0.12254902  | 0.018785928 |
| <i>Ophiosphaerella</i>    | 1 | 14 | 0.12254902  | 0.017533533 |
| <i>Mucor</i>              | 2 | 14 | 0.245098039 | 0.017533533 |
| <i>Uwebraunia</i>         | 1 | 13 | 0.12254902  | 0.016281138 |
| <i>Keissleriella</i>      | 1 | 13 | 0.12254902  | 0.016281138 |
| <i>Sclerostagonospora</i> | 1 | 13 | 0.12254902  | 0.016281138 |
| <i>Cercophora</i>         | 1 | 13 | 0.12254902  | 0.016281138 |
| <i>Stagonospora</i>       | 1 | 12 | 0.12254902  | 0.015028742 |
| <i>Bipolaris</i>          | 1 | 12 | 0.12254902  | 0.015028742 |
| <i>Myrmecridium</i>       | 1 | 12 | 0.12254902  | 0.015028742 |

---

---

|                         |   |    |            |             |
|-------------------------|---|----|------------|-------------|
| <i>Eutypella</i>        | 1 | 12 | 0.12254902 | 0.015028742 |
| <i>Cystodendron</i>     | 1 | 11 | 0.12254902 | 0.013776347 |
| <i>Taphrina</i>         | 1 | 11 | 0.12254902 | 0.013776347 |
| <i>Bensingtonia</i>     | 1 | 11 | 0.12254902 | 0.013776347 |
| <i>Cylindrocarpon</i>   | 1 | 10 | 0.12254902 | 0.012523952 |
| <i>Arthrographis</i>    | 1 | 8  | 0.12254902 | 0.010019162 |
| <i>Metacordyceps</i>    | 1 | 8  | 0.12254902 | 0.010019162 |
| <i>Phallus</i>          | 1 | 7  | 0.12254902 | 0.008766766 |
| <i>Dexomyces</i>        | 1 | 7  | 0.12254902 | 0.008766766 |
| <i>Septoria</i>         | 1 | 5  | 0.12254902 | 0.006261976 |
| <i>Leptosphaerulina</i> | 1 | 5  | 0.12254902 | 0.006261976 |
| <i>Camptophora</i>      | 1 | 5  | 0.12254902 | 0.006261976 |
| <i>Myrmaecium</i>       | 1 | 5  | 0.12254902 | 0.006261976 |
| <i>Limonomyces</i>      | 1 | 5  | 0.12254902 | 0.006261976 |
| <i>Mrakia</i>           | 1 | 5  | 0.12254902 | 0.006261976 |

---

Supplementary Table S6. Data of geographical distance (km) between sampled sites.

| site | 1      | 2      | 3      | 4      | 5      | 6      | 7      | 8      | 9      | 10     | 11     | 12     | 13     | 14     | 15     | 16     | 17     | 18     | 19     | 20     | 21     | 22     | 23     | 24     | 25     | 26     | 27     | 28     | 29     | 30     |
|------|--------|--------|--------|--------|--------|--------|--------|--------|--------|--------|--------|--------|--------|--------|--------|--------|--------|--------|--------|--------|--------|--------|--------|--------|--------|--------|--------|--------|--------|--------|
| 1    | 0.00   | 206.36 | 308.62 | 159.46 | 192.58 | 234.60 | 311.69 | 325.49 | 433.16 | 423.01 | 433.16 | 542.31 | 534.33 | 646.37 | 647.43 | 762.72 | 699.67 | 781.72 | 732.98 | 787.65 | 859.62 | 888.25 | 919.62 | 997.47 | 890.38 | 947.99 | 903.95 | 839.04 | 818.58 | 778.06 |
| 2    | 206.36 | 0.00   | 102.26 | 241.72 | 182.38 | 120.43 | 254.19 | 205.85 | 398.39 | 345.78 | 312.38 | 487.82 | 446.41 | 560.84 | 539.02 | 659.66 | 610.52 | 700.04 | 647.40 | 731.63 | 840.58 | 855.02 | 873.27 | 941.89 | 826.34 | 921.69 | 881.20 | 818.27 | 795.98 | 751.46 |
| 3    | 308.62 | 102.26 | 0.00   | 325.48 | 250.07 | 160.24 | 281.79 | 204.77 | 418.23 | 347.59 | 289.45 | 490.35 | 432.43 | 541.78 | 507.03 | 626.48 | 587.28 | 678.14 | 624.91 | 723.01 | 848.42 | 855.34 | 866.40 | 928.87 | 811.02 | 924.24 | 886.32 | 825.76 | 803.08 | 757.68 |
| 4    | 159.46 | 241.72 | 325.48 | 0.00   | 89.22  | 182.04 | 185.15 | 237.64 | 282.37 | 290.74 | 326.29 | 393.48 | 399.46 | 505.95 | 518.09 | 627.25 | 559.35 | 636.76 | 590.43 | 634.72 | 700.59 | 730.45 | 763.64 | 842.86 | 738.50 | 789.30 | 745.07 | 680.17 | 659.90 | 619.93 |
| 5    | 192.58 | 182.38 | 250.07 | 89.22  | 0.00   | 95.95  | 119.11 | 151.03 | 248.23 | 230.43 | 248.23 | 353.85 | 341.75 | 454.07 | 455.54 | 570.19 | 507.29 | 590.22 | 540.93 | 601.19 | 687.39 | 710.11 | 736.89 | 812.28 | 702.49 | 773.09 | 730.33 | 665.86 | 644.41 | 601.79 |
| 6    | 234.60 | 120.43 | 160.24 | 182.04 | 95.95  | 0.00   | 134.10 | 96.85  | 278.10 | 227.67 | 208.17 | 368.33 | 332.37 | 447.51 | 433.02 | 552.69 | 498.63 | 586.80 | 534.81 | 613.60 | 720.16 | 735.10 | 754.50 | 824.50 | 709.96 | 801.51 | 760.86 | 697.87 | 675.59 | 631.12 |
| 7    | 311.69 | 254.19 | 281.79 | 185.15 | 119.11 | 134.10 | 0.00   | 92.29  | 144.25 | 111.32 | 144.25 | 240.58 | 222.64 | 335.29 | 337.27 | 451.13 | 388.40 | 472.22 | 422.39 | 488.24 | 587.20 | 604.35 | 626.82 | 699.72 | 587.79 | 669.76 | 628.48 | 565.04 | 542.92 | 498.82 |
| 8    | 325.49 | 205.85 | 204.77 | 237.64 | 151.03 | 96.85  | 92.29  | 0.00   | 214.60 | 144.25 | 111.32 | 287.78 | 240.58 | 355.03 | 336.78 | 456.84 | 405.06 | 494.29 | 441.76 | 527.44 | 645.13 | 654.85 | 669.91 | 736.89 | 620.84 | 722.88 | 683.93 | 622.53 | 599.93 | 554.71 |
| 9    | 433.16 | 398.39 | 418.23 | 282.37 | 248.23 | 278.10 | 144.25 | 214.60 | 0.00   | 91.19  | 182.37 | 111.32 | 143.54 | 230.67 | 261.35 | 355.55 | 282.94 | 355.47 | 311.22 | 354.52 | 443.30 | 462.60 | 488.71 | 564.86 | 457.33 | 526.86 | 485.02 | 421.25 | 399.27 | 355.59 |
| 10   | 423.01 | 345.78 | 347.59 | 290.74 | 230.43 | 227.67 | 111.32 | 144.25 | 91.19  | 0.00   | 91.19  | 143.54 | 111.32 | 224.61 | 227.51 | 339.91 | 277.47 | 362.59 | 311.99 | 386.04 | 501.08 | 510.83 | 527.50 | 596.83 | 482.52 | 578.68 | 539.69 | 478.45 | 455.82 | 410.54 |
| 11   | 433.16 | 312.38 | 289.45 | 326.29 | 248.23 | 208.17 | 144.25 | 111.32 | 182.37 | 91.19  | 0.00   | 212.70 | 143.54 | 252.81 | 226.80 | 347.35 | 300.07 | 390.57 | 337.45 | 433.99 | 567.09 | 568.99 | 577.45 | 639.48 | 521.80 | 638.69 | 602.61 | 544.39 | 521.66 | 476.13 |
| 12   | 542.31 | 487.82 | 490.35 | 393.48 | 353.85 | 368.33 | 240.58 | 287.78 | 111.32 | 143.54 | 212.70 | 0.00   | 90.06  | 126.44 | 175.76 | 251.14 | 175.87 | 244.31 | 201.43 | 247.80 | 358.11 | 367.52 | 386.60 | 459.24 | 348.66 | 435.15 | 396.23 | 335.43 | 312.74 | 267.33 |
| 13   | 534.33 | 446.41 | 432.43 | 399.46 | 341.75 | 332.37 | 222.64 | 240.58 | 143.54 | 111.32 | 143.54 | 90.06  | 0.00   | 115.17 | 120.65 | 228.76 | 167.06 | 254.43 | 202.61 | 290.60 | 426.75 | 425.94 | 434.03 | 497.56 | 380.70 | 495.90 | 460.76 | 404.14 | 381.51 | 336.20 |
| 14   | 646.37 | 560.84 | 541.78 | 505.95 | 454.07 | 447.51 | 335.29 | 355.03 | 230.67 | 224.61 | 252.81 | 126.44 | 115.17 | 0.00   | 75.57  | 125.26 | 53.46  | 139.34 | 87.52  | 188.20 | 344.45 | 331.45 | 330.00 | 387.40 | 269.28 | 402.00 | 371.99 | 322.85 | 301.36 | 258.89 |
| 15   | 647.43 | 539.02 | 507.03 | 518.09 | 455.54 | 433.02 | 337.27 | 336.78 | 261.35 | 227.51 | 226.80 | 175.76 | 120.65 | 75.57  | 0.00   | 120.68 | 90.92  | 177.53 | 126.38 | 250.26 | 414.37 | 395.68 | 386.41 | 434.18 | 316.06 | 465.64 | 438.85 | 393.37 | 372.51 | 331.38 |
| 16   | 762.72 | 659.66 | 626.48 | 627.25 | 570.19 | 552.69 | 451.13 | 456.84 | 355.55 | 339.91 | 347.35 | 251.14 | 228.76 | 125.26 | 120.68 | 0.00   | 76.72  | 88.95  | 69.71  | 187.59 | 359.46 | 324.90 | 299.99 | 332.12 | 218.92 | 390.48 | 373.01 | 341.79 | 324.68 | 292.56 |
| 17   | 699.67 | 610.52 | 587.28 | 559.35 | 507.29 | 498.63 | 388.40 | 405.06 | 282.94 | 277.47 | 300.07 | 175.87 | 167.06 | 53.46  | 90.92  | 76.72  | 0.00   | 90.87  | 37.66  | 160.26 | 327.81 | 305.69 | 295.56 | 345.66 | 227.14 | 375.33 | 349.89 | 307.57 | 287.65 | 249.06 |
| 18   | 781.72 | 700.04 | 678.14 | 636.76 | 590.22 | 586.80 | 472.22 | 494.29 | 355.47 | 362.59 | 390.57 | 244.31 | 254.43 | 139.34 | 177.53 | 88.95  | 90.87  | 0.00   | 53.23  | 100.43 | 271.18 | 236.10 | 214.39 | 256.67 | 138.85 | 302.38 | 284.07 | 254.14 | 237.98 | 209.14 |
| 19   | 732.98 | 647.40 | 624.91 | 590.43 | 540.93 | 534.81 | 422.39 | 441.76 | 311.22 | 311.99 | 337.45 | 201.43 | 202.61 | 87.52  | 126.38 | 69.71  | 37.66  | 53.23  | 0.00   | 130.51 | 301.57 | 274.73 | 260.73 | 308.47 | 190.05 | 343.50 | 320.47 | 282.34 | 263.61 | 228.14 |
| 20   | 787.65 | 731.63 | 723.01 | 634.72 | 601.19 | 613.60 | 488.24 | 527.44 | 354.52 | 386.04 | 433.99 | 247.80 | 290.60 | 188.20 | 250.26 | 187.59 | 160.26 | 100.43 | 130.51 | 0.00   | 172.18 | 145.47 | 143.46 | 211.48 | 104.70 | 215.40 | 190.08 | 154.20 | 137.56 | 110.76 |
| 21   | 859.62 | 840.58 | 848.42 | 700.59 | 687.39 | 720.16 | 587.20 | 645.13 | 443.30 | 501.08 | 567.09 | 358.11 | 426.75 | 344.45 | 414.37 | 359.46 | 327.81 | 271.18 | 301.57 | 172.18 | 0.00   | 63.31  | 125.60 | 202.51 | 189.76 | 90.91  | 45.55  | 22.71  | 45.45  | 91.00  |
| 22   | 888.25 | 855.02 | 855.34 | 730.45 | 710.11 | 735.10 | 604.35 | 654.85 | 462.60 | 510.83 | 568.99 | 367.52 | 425.94 | 331.45 | 395.68 | 324.90 | 305.69 | 236.10 | 274.73 | 145.47 | 63.31  | 0.00   | 62.29  | 141.59 | 133.11 | 70.57  | 49.76  | 67.39  | 78.10  | 110.93 |
| 23   | 919.62 | 873.27 | 866.40 | 763.64 | 736.89 | 754.50 | 626.82 | 669.91 | 488.71 | 527.50 | 577.45 | 386.60 | 434.03 | 330.00 | 386.41 | 299.99 | 295.56 | 214.39 | 260.73 | 143.46 | 125.60 | 62.29  | 0.00   | 85.23  | 86.70  | 97.99  | 103.49 | 127.74 | 133.69 | 155.09 |
| 24   | 997.47 | 941.89 | 928.87 | 842.86 | 812.28 | 824.50 | 699.72 | 736.89 | 564.86 | 596.83 | 639.48 | 459.24 | 497.56 | 387.40 | 434.18 | 332.12 | 345.66 | 256.67 | 308.47 | 211.48 | 202.51 | 141.59 | 85.23  | 0.00   | 118.56 | 141.73 | 169.05 | 208.97 | 217.57 | 240.24 |

---

|    |        |        |        |        |        |        |        |        |        |        |        |        |        |        |        |        |        |        |        |        |        |        |        |        |        |        |        |        |        |        |
|----|--------|--------|--------|--------|--------|--------|--------|--------|--------|--------|--------|--------|--------|--------|--------|--------|--------|--------|--------|--------|--------|--------|--------|--------|--------|--------|--------|--------|--------|--------|
| 25 | 890.38 | 826.34 | 811.02 | 738.50 | 702.49 | 709.96 | 587.79 | 620.84 | 457.33 | 482.52 | 521.80 | 348.66 | 380.70 | 269.28 | 316.06 | 218.92 | 227.14 | 138.85 | 190.05 | 104.70 | 189.76 | 133.11 | 86.70  | 118.56 | 0.00   | 184.20 | 181.87 | 182.66 | 178.11 | 177.41 |
| 26 | 947.99 | 921.69 | 924.24 | 789.30 | 773.09 | 801.51 | 669.76 | 722.88 | 526.86 | 578.68 | 638.69 | 435.15 | 495.90 | 402.00 | 465.64 | 390.48 | 375.33 | 302.38 | 343.50 | 215.40 | 90.91  | 70.57  | 97.99  | 141.73 | 184.20 | 0.00   | 45.36  | 109.51 | 129.42 | 171.36 |
| 27 | 903.95 | 881.20 | 886.32 | 745.07 | 730.33 | 760.86 | 628.48 | 683.93 | 485.02 | 539.69 | 602.61 | 396.23 | 460.76 | 371.99 | 438.85 | 373.01 | 349.89 | 284.07 | 320.47 | 190.08 | 45.55  | 49.76  | 103.49 | 169.05 | 181.87 | 45.36  | 0.00   | 64.91  | 85.93  | 129.74 |
| 28 | 839.04 | 818.27 | 825.76 | 680.17 | 665.86 | 697.87 | 565.04 | 622.53 | 421.25 | 478.45 | 544.39 | 335.43 | 404.14 | 322.85 | 393.37 | 341.79 | 307.57 | 254.14 | 282.34 | 154.20 | 22.71  | 67.39  | 127.74 | 208.97 | 182.66 | 109.51 | 64.91  | 0.00   | 22.74  | 68.29  |
| 29 | 818.58 | 795.98 | 803.08 | 659.90 | 644.41 | 675.59 | 542.92 | 599.93 | 399.27 | 455.82 | 521.66 | 312.74 | 381.51 | 301.36 | 372.51 | 324.68 | 287.65 | 237.98 | 263.61 | 137.56 | 45.45  | 78.10  | 133.69 | 217.57 | 178.11 | 129.42 | 85.93  | 22.74  | 0.00   | 45.55  |
| 30 | 778.06 | 751.46 | 757.68 | 619.93 | 601.79 | 631.12 | 498.82 | 554.71 | 355.59 | 410.54 | 476.13 | 267.33 | 336.20 | 258.89 | 331.38 | 292.56 | 249.06 | 209.14 | 228.14 | 110.76 | 91.00  | 110.93 | 155.09 | 240.24 | 177.41 | 171.36 | 129.74 | 68.29  | 45.55  | 0.00   |

---
